# Supplementary material for: Comprehensive bioinformatics analysis reveals prognostic significance and immunological roles of WNT gene family in breast cancer
Source: Sci Rep. 2025 Oct 3;15:34490. doi: 10.1038/s41598-025-13315-6 (PMC12494856; doi:10.1038/s41598-025-13315-6)
Supplement: Supplementary file 2 — Supplementary Material 2. [file 41598_2025_13315_MOESM2_ESM.xlsx]

## Sheet: Supplementary Tables S2
PPIN construction and enrichment analysis
AverageShortestPathLength	BetweennessCentrality	ClosenessCentrality	ClusteringCoefficient	Degree	degree.layout	diffusion_input	diffusion_output_heat	diffusion_output_rank	Eccentricity	EdgeCount	Indegree	IsSingleNode	name	NeighborhoodConnectivity	NumberOfUndirectedEdges	Outdegree	Radiality	selected	shared name	Stress	TopologicalCoefficient
1	0	1	0.5	16	16	0	0.0135485	52	1	16	0	FALSE	TMED5	50.875	16	16	0.986686	FALSE	TMED5	0	0.978365
1.53333	0.000448	0.652174	0.494071	23	23	0	0.0156331	51	2	23	9	FALSE	LRP5L	49.6522	23	14	0.989275	FALSE	LRP5L	19	0.954849
1.19355	0	0.837838	0.494652	34	34	0	0.0174948	48	2	34	9	FALSE	GPC3	49.6471	34	25	0.993343	FALSE	GPC3	0	0.954751
1.11538	0.0308363	0.896552	0.479487	40	40	0	0.0178513	47	2	40	17	FALSE	MUSK	48.7	40	23	0.995562	FALSE	MUSK	336	0.936538
1.32653	0	0.753846	0.498106	33	33	0	0.0173931	49	2	33	0	FALSE	CER1	49.7576	33	33	0.992973	FALSE	CER1	0	0.956876
1	0.0225211	1	0.466531	50	50	0	0.0189889	26	1	50	7	FALSE	FRZB	47.54	50	43	0.99926	FALSE	FRZB	493	0.914231
1	0.00444109	1	0.454118	51	51	0	0.0188523	42	1	51	38	FALSE	WNT10B	46.902	51	13	0.99963	FALSE	WNT10B	112	0.901961
1	0.0105496	1	0.48227	48	48	0	0.0191525	5	1	48	29	FALSE	SFRP4	48.375	48	19	0.998521	FALSE	SFRP4	146	0.930288
1	0.00979545	1	0.480053	48	48	0	0.0191422	6	1	48	28	FALSE	SFRP2	48.25	48	20	0.998521	FALSE	SFRP2	147	0.927885
1	0.00268141	1	0.454118	51	51	0	0.0188523	41	1	51	42	FALSE	WNT2B	46.902	51	9	0.99963	FALSE	WNT2B	84	0.901961
1	0.00111027	1	0.476616	49	49	0	0.0190902	11	1	49	33	FALSE	WIF1	48.0612	49	16	0.998891	FALSE	WIF1	39	0.924254
1	0.00444109	1	0.454118	51	51	0	0.0188523	40	1	51	39	FALSE	WNT11	46.902	51	12	0.99963	FALSE	WNT11	112	0.901961
1	0	1	0.463673	50	50	0	0.018948	30	1	50	43	FALSE	WNT5B	47.4	50	7	0.99926	FALSE	WNT5B	0	0.911538
1	0	1	0.463673	50	50	0	0.018948	29	1	50	36	FALSE	WNT10A	47.4	50	14	0.99926	FALSE	WNT10A	0	0.911538
1.04255	0.0204517	0.959184	0.474734	48	48	0	0.019098	10	2	48	3	FALSE	DKK2	48.0208	48	45	0.998521	FALSE	DKK2	353	0.923478
1.07692	0	0.928571	0.493129	44	44	0	0.0192946	1	2	44	20	FALSE	NKD2	49.0909	44	24	0.997041	FALSE	NKD2	0	0.944056
1	0.0015083	1	0.454118	51	51	0	0.0188523	39	1	51	49	FALSE	WNT8B	46.902	51	2	0.99963	FALSE	WNT8B	56	0.901961
1	0.0015083	1	0.454118	51	51	0	0.0188523	38	1	51	48	FALSE	WNT8A	46.902	51	3	0.99963	FALSE	WNT8A	56	0.901961
1	0.000587	1	0.48599	46	46	0	0.0192171	3	1	46	28	FALSE	SFRP5	48.6087	46	18	0.997781	FALSE	SFRP5	14	0.934783
1	0.0371627	1	0.488437	47	47	0	0.0192213	2	1	47	23	FALSE	PORCN	48.7234	47	24	0.998151	FALSE	PORCN	150	0.936989
1	0	1	0.470301	48	48	0	0.0190005	21	1	48	33	FALSE	WLS	47.8125	48	15	0.998521	FALSE	WLS	0	0.919471
1.04	0.0135931	0.961538	0.47828	48	48	0	0.0190902	12	2	48	24	FALSE	NOTUM	48.1458	48	24	0.998521	FALSE	NOTUM	245	0.925881
1	0.0015083	1	0.454118	51	51	0	0.0188523	37	1	51	45	FALSE	WNT6	46.902	51	6	0.99963	FALSE	WNT6	56	0.901961
1	0.0060646	1	0.484615	40	40	0	0.0191953	4	1	40	8	FALSE	FZD10	48.7	40	32	0.995562	FALSE	FZD10	140	0.936538
1	0	1	0.463673	50	50	0	0.018948	28	1	50	39	FALSE	WNT16	47.4	50	11	0.99926	FALSE	WNT16	0	0.911538
1.04348	0.0204517	0.958333	0.474734	48	48	0	0.019098	9	2	48	4	FALSE	DKK4	48.0208	48	44	0.998521	FALSE	DKK4	353	0.923478
1	0.0560051	1	0.460408	50	50	0	0.018898	33	1	50	12	FALSE	FZD4	47.24	50	38	0.99926	FALSE	FZD4	1241	0.908462
1	0.0426235	1	0.463265	50	50	0	0.018962	27	1	50	28	FALSE	RYK	47.38	50	22	0.99926	FALSE	RYK	849	0.911154
1.02222	0.02032	0.978261	0.468537	49	49	0	0.0190195	18	2	49	5	FALSE	DVL1	47.6735	49	44	0.998891	FALSE	DVL1	655	0.916797
1	0.0354382	1	0.471717	45	45	0	0.0190633	13	1	45	22	FALSE	ROR2	48.0222	45	23	0.997411	FALSE	ROR2	756	0.923504
1	0.0633939	1	0.470238	49	49	0	0.018997	23	1	49	16	FALSE	FZD8	47.7551	49	33	0.998891	FALSE	FZD8	1171	0.918367
1	0.0668538	1	0.457647	51	51	0	0.0189053	32	1	51	3	FALSE	DKK1	47.0784	51	48	0.99963	FALSE	DKK1	1129	0.905354
1	0.00678547	1	0.473214	49	49	0	0.0190628	15	1	49	32	FALSE	VANGL2	47.898	49	17	0.998891	FALSE	VANGL2	344	0.921115
1.02703	0.0411735	0.973684	0.470238	49	49	0	0.018997	22	2	49	13	FALSE	FZD5	47.7551	49	36	0.998891	FALSE	FZD5	1110	0.918367
1.02778	0.0540996	0.972973	0.471631	48	48	0	0.0190153	19	2	48	13	FALSE	FZD6	47.8542	48	35	0.998521	FALSE	FZD6	833	0.920272
1	0.0171777	1	0.47463	44	44	0	0.0190614	16	1	44	13	FALSE	FZD9	48.1818	44	31	0.997041	FALSE	FZD9	762	0.926573
1	0.00249197	1	0.445701	52	52	0	0.0187737	46	1	52	48	FALSE	WNT7B	46.4615	52	4	1	FALSE	WNT7B	116	0.893491
1.025	0.0375285	0.97561	0.46131	49	49	0	0.0188937	34	2	49	10	FALSE	FZD2	47.3265	49	39	0.998891	FALSE	FZD2	1083	0.910126
1.02273	0.02032	0.977778	0.468537	49	49	0	0.0190195	17	2	49	6	FALSE	DVL3	47.6735	49	43	0.998891	FALSE	DVL3	655	0.916797
1	0.0426302	1	0.467347	50	50	0	0.019002	20	1	50	20	FALSE	LRP5	47.58	50	30	0.99926	FALSE	LRP5	924	0.915
0	0	0	0.454902	51	51	0	0.0188651	35	0	51	51	FALSE	WNT9B	46.9412	51	0	0.99963	FALSE	WNT9B	0	0.902715
1.04762	0.0217004	0.954545	0.474734	48	48	0	0.0190628	14	2	48	8	FALSE	FZD1	48	48	40	0.998521	FALSE	FZD1	740	0.923077
1.02941	0.0376586	0.971429	0.471188	48	48	0	0.0189951	25	2	48	15	FALSE	FZD7	47.8542	48	33	0.998521	FALSE	FZD7	1015	0.920272
1	0.00249197	1	0.445701	52	52	0	0.0187737	45	1	52	47	FALSE	WNT7A	46.4615	52	5	1	FALSE	WNT7A	116	0.893491
1	0	1	0.454902	51	51	0	0.0188651	36	1	51	50	FALSE	WNT9A	46.9412	51	1	0.99963	FALSE	WNT9A	0	0.902715
1.03704	0.0141229	0.964286	0.476873	47	47	0	0.0191126	8	2	47	21	FALSE	NKD1	48.1489	47	26	0.998151	FALSE	NKD1	660	0.925941
1	0.00530805	1	0.445701	52	52	0	0.0187737	44	1	52	42	FALSE	WNT2	46.4615	52	10	1	FALSE	WNT2	234	0.893491
1	0.101621	1	0.457647	51	51	0	0.0189053	31	1	51	22	FALSE	LRP6	47.0784	51	29	0.99963	FALSE	LRP6	1372	0.905354
1.07692	0.0117102	0.928571	0.483092	46	46	0	0.019125	7	2	46	10	FALSE	FZD3	48.5217	46	36	0.997781	FALSE	FZD3	562	0.93311
1	0.00474244	1	0.445701	52	52	0	0.0187737	43	1	52	44	FALSE	WNT3	46.4615	52	8	1	FALSE	WNT3	204	0.893491
1.04762	0.0132684	0.954545	0.467687	49	49	0	0.0189961	24	2	49	29	FALSE	SFRP1	47.6327	49	20	0.998891	FALSE	SFRP1	507	0.916013
1.4898	0	0.671233	0.491667	25	25	0	0.0162375	50	2	25	0	FALSE	ADGRA2	49.24	25	25	0.990015	FALSE	ADGRA2	0	0.946923
					47	0	0						CCN4					FALSE	CCN4

## Sheet: Data Dictionary
Variable	Description
AverageShortestPathLength	Average length of the shortest paths between all pairs of nodes in the network. Measures network efficiency.
BetweennessCentrality	Number of shortest paths passing through a node. Identifies influential "bridge" nodes in the network.
ClosenessCentrality	Average inverse distance from a node to all other nodes. Measures how central a node is in the network.
ClusteringCoefficient	Likelihood that neighboring nodes are interconnected. Quantifies local "cliquishness" of a node.
Degree	Total number of edges (connections) a node has.
degree.layout	Layout algorithm parameter that scales node size/position based on degree (e.g., in visualization tools).
diffusion_input	Input metric for diffusion-based algorithms (e.g., heat diffusion, information spread) across the network.
diffusion_output_heat	Output value from a diffusion process (e.g., "heat" propagated to a node).
diffusion_output_rank	Rank of nodes based on diffusion output (e.g., prioritization of nodes after diffusion).
Eccentricity	Maximum shortest path length from a node to any other node.
EdgeCount	Total number of edges in the network.
Indegree	Number of incoming edges to a node (in directed networks).
IsSingleNode	Boolean indicating whether a node is isolated (no edges).
name	Label or identifier of a node (e.g., gene name, protein ID).
NeighborhoodConnectivity	Average degree of neighboring nodes. Measures local connectivity around a node.
NumberOfUndirectedEdges	Total edges in an undirected network (non-directional connections).
Outdegree	Number of outgoing edges from a node (in directed networks).
Radiality	Measure of how close a node is to all other nodes (related to closeness centrality).
selected	Flag indicating whether a node/edge is selected (e.g., in visualization or analysis workflows).
shared name	Default node/edge identifier in some tools (e.g., Cytoscape) if no custom "name" is provided.
Stress	Number of shortest paths passing through a node or edge. Similar to betweenness but counts all shortest paths.
TopologicalCoefficient	Measures how interconnected a node's neighbors are relative to all possible connections.
