# Supplementary material for: Comprehensive bioinformatics analysis reveals prognostic significance and immunological roles of WNT gene family in breast cancer
Source: Sci Rep. 2025 Oct 3;15:34490. doi: 10.1038/s41598-025-13315-6 (PMC12494856; doi:10.1038/s41598-025-13315-6)
Supplement: Supplementary file 3 — Supplementary Material 3. [file 41598_2025_13315_MOESM3_ESM.xlsx]

## Sheet: Supplementary Tables S3
PPIN construction and enrichment analysis
automated_textmining	BEND_MAP_ID	coexpression	combined_score	database_annotated	EdgeBetweenness	experimentally_determined_interaction	gene_fusion	homology	interaction	name	neighborhood_on_chromosome	node1_string_id	node2_string_id	phylogenetic_cooccurrence	selected	shared interaction	shared name
0.049	288	0.055	0.432	0.4	29	0.071	0	0	interacts with	TMED5 (interacts with) WNT8A	0	9606.ENSP00000359305	9606.ENSP00000426653	0	FALSE	interacts with	TMED5 (interacts with) WNT8A
0.049	290	0.055	0.432	0.4	29	0.071	0	0	interacts with	TMED5 (interacts with) WNT5B	0	9606.ENSP00000359305	9606.ENSP00000380379	0	FALSE	interacts with	TMED5 (interacts with) WNT5B
0.176	294	0	0.176	0	29	0	0	0	interacts with	TMED5 (interacts with) WLS	0	9606.ENSP00000359305	9606.ENSP00000346829	0	FALSE	interacts with	TMED5 (interacts with) WLS
0.253	296	0.055	0.554	0.4	29	0.071	0	0	interacts with	TMED5 (interacts with) WNT7B	0	9606.ENSP00000359305	9606.ENSP00000341032	0	FALSE	interacts with	TMED5 (interacts with) WNT7B
0.111	298	0.055	0.469	0.4	29	0.071	0	0	interacts with	TMED5 (interacts with) WNT8B	0	9606.ENSP00000359305	9606.ENSP00000340677	0	FALSE	interacts with	TMED5 (interacts with) WNT8B
0.051	300	0.063	0.438	0.4	29	0.071	0	0	interacts with	TMED5 (interacts with) WNT11	0	9606.ENSP00000359305	9606.ENSP00000325526	0	FALSE	interacts with	TMED5 (interacts with) WNT11
0.063	302	0.055	0.438	0.4	29	0.068	0	0	interacts with	TMED5 (interacts with) WNT10B	0	9606.ENSP00000359305	9606.ENSP00000301061	0	FALSE	interacts with	TMED5 (interacts with) WNT10B
0	304	0.055	0.425	0.4	29	0.068	0	0	interacts with	TMED5 (interacts with) WNT9B	0	9606.ENSP00000359305	9606.ENSP00000290015	0	FALSE	interacts with	TMED5 (interacts with) WNT9B
0.049	306	0.055	0.432	0.4	29	0.071	0	0	interacts with	TMED5 (interacts with) WNT7A	0	9606.ENSP00000359305	9606.ENSP00000285018	0	FALSE	interacts with	TMED5 (interacts with) WNT7A
0	308	0.055	0.425	0.4	29	0.068	0	0	interacts with	TMED5 (interacts with) WNT9A	0	9606.ENSP00000359305	9606.ENSP00000272164	0	FALSE	interacts with	TMED5 (interacts with) WNT9A
0.086	310	0.055	0.454	0.4	29	0.071	0	0	interacts with	TMED5 (interacts with) WNT2	0	9606.ENSP00000359305	9606.ENSP00000265441	0	FALSE	interacts with	TMED5 (interacts with) WNT2
0.075	312	0.055	0.445	0.4	29	0.068	0	0	interacts with	TMED5 (interacts with) WNT10A	0	9606.ENSP00000359305	9606.ENSP00000258411	0	FALSE	interacts with	TMED5 (interacts with) WNT10A
0.049	314	0.086	0.45	0.4	29	0.071	0	0	interacts with	TMED5 (interacts with) WNT6	0	9606.ENSP00000359305	9606.ENSP00000233948	0	FALSE	interacts with	TMED5 (interacts with) WNT6
0.066	316	0.055	0.442	0.4	29	0.071	0	0	interacts with	TMED5 (interacts with) WNT3	0	9606.ENSP00000359305	9606.ENSP00000225512	0	FALSE	interacts with	TMED5 (interacts with) WNT3
0.049	318	0.055	0.432	0.4	29	0.071	0	0	interacts with	TMED5 (interacts with) WNT16	0	9606.ENSP00000359305	9606.ENSP00000222462	0	FALSE	interacts with	TMED5 (interacts with) WNT16
0.156	320	0	0.155	0	100.444	0	0	0	interacts with	LRP5L (interacts with) RYK	0	9606.ENSP00000482378	9606.ENSP00000478721	0	FALSE	interacts with	LRP5L (interacts with) RYK
0.118	322	0.055	0.179	0	32	0.095	0	0	interacts with	LRP5L (interacts with) WNT8A	0	9606.ENSP00000482378	9606.ENSP00000426653	0	FALSE	interacts with	LRP5L (interacts with) WNT8A
0.114	324	0.067	0.153	0	100.444	0.057	0	0	interacts with	LRP5L (interacts with) ROR2	0	9606.ENSP00000482378	9606.ENSP00000364860	0	FALSE	interacts with	LRP5L (interacts with) ROR2
0.115	326	0.067	0.169	0	110.965	0.075	0	0	interacts with	LRP5L (interacts with) MUSK	0	9606.ENSP00000482378	9606.ENSP00000363571	0	FALSE	interacts with	LRP5L (interacts with) MUSK
0.143	330	0	0.198	0	32	0.103	0	0	interacts with	LRP5L (interacts with) WNT7B	0	9606.ENSP00000482378	9606.ENSP00000341032	0	FALSE	interacts with	LRP5L (interacts with) WNT7B
0.173	332	0	0.219	0	32	0.095	0	0	interacts with	LRP5L (interacts with) WNT8B	0	9606.ENSP00000482378	9606.ENSP00000340677	0	FALSE	interacts with	LRP5L (interacts with) WNT8B
0.164	334	0	0.211	0	39.7778	0.095	0	0	interacts with	LRP5L (interacts with) WNT11	0	9606.ENSP00000482378	9606.ENSP00000325526	0	FALSE	interacts with	LRP5L (interacts with) WNT11
0.333	336	0	0.367	0	39.7778	0.091	0	0	interacts with	LRP5L (interacts with) WNT10B	0	9606.ENSP00000482378	9606.ENSP00000301061	0	FALSE	interacts with	LRP5L (interacts with) WNT10B
0.143	338	0	0.198	0	32	0.103	0	0	interacts with	LRP5L (interacts with) WNT7A	0	9606.ENSP00000482378	9606.ENSP00000285018	0	FALSE	interacts with	LRP5L (interacts with) WNT7A
0.349	340	0	0.385	0	35.1111	0.095	0	0	interacts with	LRP5L (interacts with) WNT2	0	9606.ENSP00000482378	9606.ENSP00000265441	0	FALSE	interacts with	LRP5L (interacts with) WNT2
0.286	342	0	0.361	0	184.444	0.126	0	0.963	interacts with	LRP5L (interacts with) LRP6	0	9606.ENSP00000482378	9606.ENSP00000261349	0.058	FALSE	interacts with	LRP5L (interacts with) LRP6
0.105	344	0.045	0.158	0	32	0.095	0	0	interacts with	LRP5L (interacts with) WNT6	0	9606.ENSP00000482378	9606.ENSP00000233948	0	FALSE	interacts with	LRP5L (interacts with) WNT6
0.182	346	0	0.228	0	35.1111	0.095	0	0	interacts with	LRP5L (interacts with) WNT3	0	9606.ENSP00000482378	9606.ENSP00000225512	0	FALSE	interacts with	LRP5L (interacts with) WNT3
0.145	348	0	0.92	0.9	27	0.143	0	0	interacts with	GPC3 (interacts with) WNT5B	0	9606.ENSP00000377836	9606.ENSP00000380379	0	FALSE	interacts with	GPC3 (interacts with) WNT5B
0.079	350	0	0.914	0.9	27	0.143	0	0	interacts with	GPC3 (interacts with) WNT8A	0	9606.ENSP00000377836	9606.ENSP00000426653	0	FALSE	interacts with	GPC3 (interacts with) WNT8A
0.482	352	0.106	0.718	0	40.5	0.44	0	0	interacts with	GPC3 (interacts with) NOTUM	0	9606.ENSP00000377836	9606.ENSP00000387310	0	FALSE	interacts with	GPC3 (interacts with) NOTUM
0.378	354	0.054	0.386	0	31.5	0	0	0	interacts with	GPC3 (interacts with) RYK	0	9606.ENSP00000377836	9606.ENSP00000478721	0	FALSE	interacts with	GPC3 (interacts with) RYK
0.106	358	0.105	0.165	0	27	0	0	0	interacts with	GPC3 (interacts with) VANGL2	0	9606.ENSP00000377836	9606.ENSP00000357040	0	FALSE	interacts with	GPC3 (interacts with) VANGL2
0.273	360	0.047	0.277	0	27	0	0	0	interacts with	GPC3 (interacts with) WLS	0	9606.ENSP00000377836	9606.ENSP00000346829	0	FALSE	interacts with	GPC3 (interacts with) WLS
0.132	362	0	0.919	0.9	27	0.143	0	0	interacts with	GPC3 (interacts with) WNT7B	0	9606.ENSP00000377836	9606.ENSP00000341032	0	FALSE	interacts with	GPC3 (interacts with) WNT7B
0.057	364	0	0.912	0.9	27	0.143	0	0	interacts with	GPC3 (interacts with) WNT8B	0	9606.ENSP00000377836	9606.ENSP00000340677	0	FALSE	interacts with	GPC3 (interacts with) WNT8B
0.14	366	0.044	0.92	0.9	27	0.143	0	0	interacts with	GPC3 (interacts with) WNT11	0	9606.ENSP00000377836	9606.ENSP00000325526	0	FALSE	interacts with	GPC3 (interacts with) WNT11
0.094	368	0	0.912	0.9	27	0.115	0	0	interacts with	GPC3 (interacts with) WNT10B	0	9606.ENSP00000377836	9606.ENSP00000301061	0	FALSE	interacts with	GPC3 (interacts with) WNT10B
0.362	370	0.058	0.373	0	94.5	0	0	0	interacts with	GPC3 (interacts with) LRP5	0	9606.ENSP00000377836	9606.ENSP00000294304	0	FALSE	interacts with	GPC3 (interacts with) LRP5
0.123	372	0	0.915	0.9	27	0.115	0	0	interacts with	GPC3 (interacts with) WNT9B	0	9606.ENSP00000377836	9606.ENSP00000290015	0	FALSE	interacts with	GPC3 (interacts with) WNT9B
0.281	374	0.075	0.344	0	27	0.094	0	0	interacts with	GPC3 (interacts with) WIF1	0	9606.ENSP00000377836	9606.ENSP00000286574	0	FALSE	interacts with	GPC3 (interacts with) WIF1
0.126	376	0	0.918	0.9	27	0.143	0	0	interacts with	GPC3 (interacts with) WNT7A	0	9606.ENSP00000377836	9606.ENSP00000285018	0	FALSE	interacts with	GPC3 (interacts with) WNT7A
0.172	378	0.141	0.277	0	31.5	0.065	0	0	interacts with	GPC3 (interacts with) SFRP2	0	9606.ENSP00000377836	9606.ENSP00000274063	0	FALSE	interacts with	GPC3 (interacts with) SFRP2
0.132	380	0	0.916	0.9	27	0.115	0	0	interacts with	GPC3 (interacts with) WNT9A	0	9606.ENSP00000377836	9606.ENSP00000272164	0	FALSE	interacts with	GPC3 (interacts with) WNT9A
0.175	382	0.044	0.198	0	27	0.065	0	0	interacts with	GPC3 (interacts with) SFRP5	0	9606.ENSP00000377836	9606.ENSP00000266066	0	FALSE	interacts with	GPC3 (interacts with) SFRP5
0.216	384	0.042	0.927	0.9	27	0.143	0	0	interacts with	GPC3 (interacts with) WNT2	0	9606.ENSP00000377836	9606.ENSP00000265441	0	FALSE	interacts with	GPC3 (interacts with) WNT2
0.162	386	0.059	0.177	0	94.5	0	0	0	interacts with	GPC3 (interacts with) LRP6	0	9606.ENSP00000377836	9606.ENSP00000261349	0	FALSE	interacts with	GPC3 (interacts with) LRP6
0.078	388	0	0.911	0.9	27	0.115	0	0	interacts with	GPC3 (interacts with) WNT10A	0	9606.ENSP00000377836	9606.ENSP00000258411	0	FALSE	interacts with	GPC3 (interacts with) WNT10A
0.14	390	0	0.919	0.9	27	0.143	0	0	interacts with	GPC3 (interacts with) WNT6	0	9606.ENSP00000377836	9606.ENSP00000233948	0	FALSE	interacts with	GPC3 (interacts with) WNT6
0.159	392	0	0.921	0.9	27	0.143	0	0	interacts with	GPC3 (interacts with) WNT3	0	9606.ENSP00000377836	9606.ENSP00000225512	0	FALSE	interacts with	GPC3 (interacts with) WNT3
0.129	394	0	0.918	0.9	27	0.143	0	0	interacts with	GPC3 (interacts with) WNT16	0	9606.ENSP00000377836	9606.ENSP00000222462	0	FALSE	interacts with	GPC3 (interacts with) WNT16
0.235	396	0.118	0.314	0	31.5	0.065	0	0	interacts with	GPC3 (interacts with) SFRP1	0	9606.ENSP00000377836	9606.ENSP00000220772	0	FALSE	interacts with	GPC3 (interacts with) SFRP1
0.269	398	0	0.307	0	39	0.091	0	0.655	interacts with	MUSK (interacts with) RYK	0	9606.ENSP00000363571	9606.ENSP00000478721	0	FALSE	interacts with	MUSK (interacts with) RYK
0.197	400	0.065	0.271	0	29.1111	0.106	0	0	interacts with	MUSK (interacts with) WNT5B	0	9606.ENSP00000363571	9606.ENSP00000380379	0	FALSE	interacts with	MUSK (interacts with) WNT5B
0.173	402	0.063	0.248	0	26	0.106	0	0	interacts with	MUSK (interacts with) WNT8A	0	9606.ENSP00000363571	9606.ENSP00000426653	0	FALSE	interacts with	MUSK (interacts with) WNT8A
0.162	404	0	0.162	0	53	0	0	0	interacts with	MUSK (interacts with) NOTUM	0	9606.ENSP00000363571	9606.ENSP00000387310	0	FALSE	interacts with	MUSK (interacts with) NOTUM
0.094	406	0	0.159	0	39.5	0.11	0	0	interacts with	MUSK (interacts with) SFRP4	0	9606.ENSP00000363571	9606.ENSP00000410715	0	FALSE	interacts with	MUSK (interacts with) SFRP4
0.249	410	0	0.249	0	33	0	0	0	interacts with	MUSK (interacts with) VANGL2	0	9606.ENSP00000363571	9606.ENSP00000357040	0	FALSE	interacts with	MUSK (interacts with) VANGL2
0.249	412	0	0.249	0	33	0	0	0	interacts with	MUSK (interacts with) WLS	0	9606.ENSP00000363571	9606.ENSP00000346829	0	FALSE	interacts with	MUSK (interacts with) WLS
0.484	414	0.065	0.531	0	26	0.106	0	0	interacts with	MUSK (interacts with) WNT7B	0	9606.ENSP00000363571	9606.ENSP00000341032	0	FALSE	interacts with	MUSK (interacts with) WNT7B
0.183	416	0.076	0.267	0	26	0.106	0	0	interacts with	MUSK (interacts with) WNT8B	0	9606.ENSP00000363571	9606.ENSP00000340677	0	FALSE	interacts with	MUSK (interacts with) WNT8B
0.623	418	0.063	0.657	0	26	0.106	0	0	interacts with	MUSK (interacts with) WNT11	0	9606.ENSP00000363571	9606.ENSP00000325526	0	FALSE	interacts with	MUSK (interacts with) WNT11
0.158	420	0	0.158	0	79	0	0	0	interacts with	MUSK (interacts with) PORCN	0	9606.ENSP00000363571	9606.ENSP00000322304	0	FALSE	interacts with	MUSK (interacts with) PORCN
0.154	422	0.054	0.223	0	26	0.106	0	0	interacts with	MUSK (interacts with) WNT10B	0	9606.ENSP00000363571	9606.ENSP00000301061	0	FALSE	interacts with	MUSK (interacts with) WNT10B
0.2	424	0.052	0.263	0	28	0.106	0	0	interacts with	MUSK (interacts with) WNT9B	0	9606.ENSP00000363571	9606.ENSP00000290015	0	FALSE	interacts with	MUSK (interacts with) WNT9B
0.114	426	0.1	0.168	0	33	0	0	0	interacts with	MUSK (interacts with) WIF1	0	9606.ENSP00000363571	9606.ENSP00000286574	0	FALSE	interacts with	MUSK (interacts with) WIF1
0.261	428	0.063	0.327	0	26	0.106	0	0	interacts with	MUSK (interacts with) WNT7A	0	9606.ENSP00000363571	9606.ENSP00000285018	0	FALSE	interacts with	MUSK (interacts with) WNT7A
0.54	430	0.052	0.576	0	28	0.106	0	0	interacts with	MUSK (interacts with) WNT9A	0	9606.ENSP00000363571	9606.ENSP00000272164	0	FALSE	interacts with	MUSK (interacts with) WNT9A
0.504	432	0.063	0.548	0	26	0.106	0	0	interacts with	MUSK (interacts with) WNT2	0	9606.ENSP00000363571	9606.ENSP00000265441	0	FALSE	interacts with	MUSK (interacts with) WNT2
0.12	434	0.052	0.189	0	33	0.106	0	0	interacts with	MUSK (interacts with) WNT10A	0	9606.ENSP00000363571	9606.ENSP00000258411	0	FALSE	interacts with	MUSK (interacts with) WNT10A
0.469	436	0.11	0.541	0	26	0.106	0	0	interacts with	MUSK (interacts with) WNT6	0	9606.ENSP00000363571	9606.ENSP00000233948	0	FALSE	interacts with	MUSK (interacts with) WNT6
0.566	438	0.063	0.605	0	26	0.106	0	0	interacts with	MUSK (interacts with) WNT3	0	9606.ENSP00000363571	9606.ENSP00000225512	0	FALSE	interacts with	MUSK (interacts with) WNT3
0.208	440	0.063	0.279	0	30.6667	0.106	0	0	interacts with	MUSK (interacts with) WNT16	0	9606.ENSP00000363571	9606.ENSP00000222462	0	FALSE	interacts with	MUSK (interacts with) WNT16
0.14	442	0.042	0.203	0	39.5	0.11	0	0	interacts with	MUSK (interacts with) SFRP1	0	9606.ENSP00000363571	9606.ENSP00000220772	0	FALSE	interacts with	MUSK (interacts with) SFRP1
0.19	444	0.156	0.925	0.9	25	0	0	0	interacts with	CER1 (interacts with) WNT8A	0	9606.ENSP00000370297	9606.ENSP00000426653	0	FALSE	interacts with	CER1 (interacts with) WNT8A
0.104	446	0.055	0.907	0.9	25	0	0	0	interacts with	CER1 (interacts with) WNT5B	0	9606.ENSP00000370297	9606.ENSP00000380379	0	FALSE	interacts with	CER1 (interacts with) WNT5B
0.176	448	0.042	0.176	0	32.9934	0	0	0	interacts with	CER1 (interacts with) NOTUM	0	9606.ENSP00000370297	9606.ENSP00000387310	0	FALSE	interacts with	CER1 (interacts with) NOTUM
0.156	450	0.052	0.166	0	50.8093	0	0	0	interacts with	CER1 (interacts with) FZD4	0	9606.ENSP00000370297	9606.ENSP00000434034	0	FALSE	interacts with	CER1 (interacts with) FZD4
0.16	452	0	0.16	0	29.422	0	0	0	interacts with	CER1 (interacts with) SFRP4	0	9606.ENSP00000370297	9606.ENSP00000410715	0	FALSE	interacts with	CER1 (interacts with) SFRP4
0.393	454	0	0.393	0	43.0712	0	0	0	interacts with	CER1 (interacts with) FZD8	0	9606.ENSP00000370297	9606.ENSP00000363826	0	FALSE	interacts with	CER1 (interacts with) FZD8
0.428	456	0.132	0.482	0	84.976	0	0	0	interacts with	CER1 (interacts with) DKK1	0	9606.ENSP00000370297	9606.ENSP00000363081	0	FALSE	interacts with	CER1 (interacts with) DKK1
0.196	460	0	0.196	0	46.6427	0	0	0	interacts with	CER1 (interacts with) FZD5	0	9606.ENSP00000370297	9606.ENSP00000354607	0	FALSE	interacts with	CER1 (interacts with) FZD5
0.149	462	0.067	0.172	0	39.4998	0	0	0	interacts with	CER1 (interacts with) FZD9	0	9606.ENSP00000370297	9606.ENSP00000345785	0	FALSE	interacts with	CER1 (interacts with) FZD9
0.141	464	0.055	0.911	0.9	25	0	0	0	interacts with	CER1 (interacts with) WNT7B	0	9606.ENSP00000370297	9606.ENSP00000341032	0	FALSE	interacts with	CER1 (interacts with) WNT7B
0.076	466	0.122	0.911	0.9	25	0	0	0	interacts with	CER1 (interacts with) WNT8B	0	9606.ENSP00000370297	9606.ENSP00000340677	0	FALSE	interacts with	CER1 (interacts with) WNT8B
0.226	468	0.108	0.924	0.9	25	0	0	0	interacts with	CER1 (interacts with) WNT11	0	9606.ENSP00000370297	9606.ENSP00000325526	0	FALSE	interacts with	CER1 (interacts with) WNT11
0.184	470	0	0.184	0	55.8093	0	0	0	interacts with	CER1 (interacts with) FZD2	0	9606.ENSP00000370297	9606.ENSP00000323901	0	FALSE	interacts with	CER1 (interacts with) FZD2
0.129	472	0	0.909	0.9	25	0	0	0	interacts with	CER1 (interacts with) WNT10B	0	9606.ENSP00000370297	9606.ENSP00000301061	0	FALSE	interacts with	CER1 (interacts with) WNT10B
0.181	474	0.048	0.187	0	68.3093	0	0	0	interacts with	CER1 (interacts with) FRZB	0	9606.ENSP00000370297	9606.ENSP00000295113	0	FALSE	interacts with	CER1 (interacts with) FRZB
0.192	476	0	0.192	0	39.4998	0	0	0	interacts with	CER1 (interacts with) LRP5	0	9606.ENSP00000370297	9606.ENSP00000294304	0	FALSE	interacts with	CER1 (interacts with) LRP5
0.187	478	0.042	0.915	0.9	25	0	0	0	interacts with	CER1 (interacts with) WNT9B	0	9606.ENSP00000370297	9606.ENSP00000290015	0	FALSE	interacts with	CER1 (interacts with) WNT9B
0.178	480	0.042	0.179	0	26.3889	0	0	0	interacts with	CER1 (interacts with) WIF1	0	9606.ENSP00000370297	9606.ENSP00000286574	0	FALSE	interacts with	CER1 (interacts with) WIF1
0.151	482	0.067	0.174	0	43.0712	0	0	0	interacts with	CER1 (interacts with) FZD7	0	9606.ENSP00000370297	9606.ENSP00000286201	0	FALSE	interacts with	CER1 (interacts with) FZD7
0.22	484	0.042	0.22	0	78.9046	0	0	0	interacts with	CER1 (interacts with) DKK2	0	9606.ENSP00000370297	9606.ENSP00000285311	0	FALSE	interacts with	CER1 (interacts with) DKK2
0.1	486	0.062	0.908	0.9	25	0	0	0	interacts with	CER1 (interacts with) WNT7A	0	9606.ENSP00000370297	9606.ENSP00000285018	0	FALSE	interacts with	CER1 (interacts with) WNT7A
0.193	488	0.042	0.194	0	29.422	0	0	0	interacts with	CER1 (interacts with) SFRP2	0	9606.ENSP00000370297	9606.ENSP00000274063	0	FALSE	interacts with	CER1 (interacts with) SFRP2
0.081	490	0	0.904	0.9	25	0	0	0	interacts with	CER1 (interacts with) WNT9A	0	9606.ENSP00000370297	9606.ENSP00000272164	0	FALSE	interacts with	CER1 (interacts with) WNT9A
0.26	492	0.056	0.272	0	34.9165	0	0	0	interacts with	CER1 (interacts with) NKD1	0	9606.ENSP00000370297	9606.ENSP00000268459	0	FALSE	interacts with	CER1 (interacts with) NKD1
0.137	494	0.055	0.911	0.9	25	0	0	0	interacts with	CER1 (interacts with) WNT2	0	9606.ENSP00000370297	9606.ENSP00000265441	0	FALSE	interacts with	CER1 (interacts with) WNT2
0.165	496	0	0.165	0	39.4998	0	0	0	interacts with	CER1 (interacts with) LRP6	0	9606.ENSP00000370297	9606.ENSP00000261349	0	FALSE	interacts with	CER1 (interacts with) LRP6
0.055	498	0	0.901	0.9	25	0	0	0	interacts with	CER1 (interacts with) WNT10A	0	9606.ENSP00000370297	9606.ENSP00000258411	0	FALSE	interacts with	CER1 (interacts with) WNT10A
0.117	500	0.055	0.909	0.9	25	0	0	0	interacts with	CER1 (interacts with) WNT6	0	9606.ENSP00000370297	9606.ENSP00000233948	0	FALSE	interacts with	CER1 (interacts with) WNT6
0.438	502	0.06	0.942	0.9	25	0	0	0	interacts with	CER1 (interacts with) WNT3	0	9606.ENSP00000370297	9606.ENSP00000225512	0	FALSE	interacts with	CER1 (interacts with) WNT3
0.055	504	0.055	0.902	0.9	25	0	0	0	interacts with	CER1 (interacts with) WNT16	0	9606.ENSP00000370297	9606.ENSP00000222462	0	FALSE	interacts with	CER1 (interacts with) WNT16
0.22	506	0.11	0.276	0	78.9046	0	0	0	interacts with	CER1 (interacts with) DKK4	0	9606.ENSP00000370297	9606.ENSP00000220812	0	FALSE	interacts with	CER1 (interacts with) DKK4
0.243	508	0	0.243	0	27.8595	0	0	0	interacts with	CER1 (interacts with) SFRP1	0	9606.ENSP00000370297	9606.ENSP00000220772	0	FALSE	interacts with	CER1 (interacts with) SFRP1
0.576	510	0.088	0.652	0	25.4706	0.172	0	0	interacts with	FRZB (interacts with) VANGL2	0	9606.ENSP00000295113	9606.ENSP00000357040	0	FALSE	interacts with	FRZB (interacts with) VANGL2
0.588	512	0.049	0.648	0	24	0.173	0	0	interacts with	FRZB (interacts with) WNT11	0	9606.ENSP00000295113	9606.ENSP00000325526	0	FALSE	interacts with	FRZB (interacts with) WNT11
0.531	514	0	0.595	0	24	0.173	0	0	interacts with	FRZB (interacts with) WNT5B	0	9606.ENSP00000295113	9606.ENSP00000380379	0	FALSE	interacts with	FRZB (interacts with) WNT5B
0.503	518	0	0.571	0	24	0.173	0	0	interacts with	FRZB (interacts with) WNT7B	0	9606.ENSP00000295113	9606.ENSP00000341032	0	FALSE	interacts with	FRZB (interacts with) WNT7B
0.549	520	0.078	0.567	0	24	0	0	0.732	interacts with	FRZB (interacts with) FZD8	0	9606.ENSP00000295113	9606.ENSP00000363826	0	FALSE	interacts with	FRZB (interacts with) FZD8
0.466	522	0	0.539	0	24	0.173	0	0	interacts with	FRZB (interacts with) WNT10B	0	9606.ENSP00000295113	9606.ENSP00000301061	0	FALSE	interacts with	FRZB (interacts with) WNT10B
0.459	524	0	0.533	0	24	0.173	0	0	interacts with	FRZB (interacts with) WNT8A	0	9606.ENSP00000295113	9606.ENSP00000426653	0	FALSE	interacts with	FRZB (interacts with) WNT8A
0.485	526	0	0.512	0	25.7857	0.091	0	0	interacts with	FRZB (interacts with) RYK	0	9606.ENSP00000295113	9606.ENSP00000478721	0	FALSE	interacts with	FRZB (interacts with) RYK
0.391	528	0	0.474	0	24	0.173	0	0	interacts with	FRZB (interacts with) WNT8B	0	9606.ENSP00000295113	9606.ENSP00000340677	0	FALSE	interacts with	FRZB (interacts with) WNT8B
0.322	530	0.09	0.403	0	26.0833	0.11	0	0	interacts with	FRZB (interacts with) ROR2	0	9606.ENSP00000295113	9606.ENSP00000364860	0	FALSE	interacts with	FRZB (interacts with) ROR2
0.348	532	0.062	0.362	0	25.3889	0	0	0	interacts with	FRZB (interacts with) WLS	0	9606.ENSP00000295113	9606.ENSP00000346829	0	FALSE	interacts with	FRZB (interacts with) WLS
0.317	534	0	0.317	0	24	0	0	0	interacts with	FRZB (interacts with) NOTUM	0	9606.ENSP00000295113	9606.ENSP00000387310	0	FALSE	interacts with	FRZB (interacts with) NOTUM
0.296	536	0.045	0.312	0	25.9231	0.06	0	0	interacts with	FRZB (interacts with) NKD2	0	9606.ENSP00000295113	9606.ENSP00000296849	0	FALSE	interacts with	FRZB (interacts with) NKD2
0.286	538	0	0.286	0	25.7857	0	0	0	interacts with	FRZB (interacts with) PORCN	0	9606.ENSP00000295113	9606.ENSP00000322304	0	FALSE	interacts with	FRZB (interacts with) PORCN
0.264	540	0.054	0.274	0	24	0	0	0.719	interacts with	FRZB (interacts with) FZD2	0	9606.ENSP00000295113	9606.ENSP00000323901	0	FALSE	interacts with	FRZB (interacts with) FZD2
0.197	542	0	0.254	0	27.875	0.11	0	0	interacts with	FRZB (interacts with) MUSK	0	9606.ENSP00000295113	9606.ENSP00000363571	0	FALSE	interacts with	FRZB (interacts with) MUSK
0.209	544	0.06	0.224	0	24	0	0	0.744	interacts with	FRZB (interacts with) FZD5	0	9606.ENSP00000295113	9606.ENSP00000354607	0	FALSE	interacts with	FRZB (interacts with) FZD5
0.188	546	0.074	0.216	0	24	0	0	0.681	interacts with	FRZB (interacts with) FZD4	0	9606.ENSP00000295113	9606.ENSP00000434034	0	FALSE	interacts with	FRZB (interacts with) FZD4
0.102	548	0.141	0.212	0	24	0	0	0.932	interacts with	FRZB (interacts with) SFRP4	0	9606.ENSP00000295113	9606.ENSP00000410715	0.061	FALSE	interacts with	FRZB (interacts with) SFRP4
0.204	550	0	0.204	0	27.5714	0	0	0.635	interacts with	FRZB (interacts with) FZD6	0	9606.ENSP00000295113	9606.ENSP00000351605	0	FALSE	interacts with	FRZB (interacts with) FZD6
0.189	552	0	0.189	0	24	0	0	0.677	interacts with	FRZB (interacts with) FZD9	0	9606.ENSP00000295113	9606.ENSP00000345785	0	FALSE	interacts with	FRZB (interacts with) FZD9
0.138	554	0.084	0.186	0	42.2798	0.052	0	0	interacts with	FRZB (interacts with) GPC3	0	9606.ENSP00000295113	9606.ENSP00000377836	0	FALSE	interacts with	FRZB (interacts with) GPC3
0.142	556	0.043	0.178	0	28.5	0.08	0	0	interacts with	FRZB (interacts with) LRP5L	0	9606.ENSP00000295113	9606.ENSP00000482378	0	FALSE	interacts with	FRZB (interacts with) LRP5L
0.784	558	0	0.793	0	24	0.08	0	0	interacts with	FRZB (interacts with) LRP5	0	9606.ENSP00000295113	9606.ENSP00000294304	0	FALSE	interacts with	FRZB (interacts with) LRP5
0.352	560	0	0.441	0	24	0.173	0	0	interacts with	FRZB (interacts with) WNT9B	0	9606.ENSP00000295113	9606.ENSP00000290015	0	FALSE	interacts with	FRZB (interacts with) WNT9B
0.188	562	0.056	0.201	0	30.25	0	0	0.721	interacts with	FRZB (interacts with) FZD1	0	9606.ENSP00000295113	9606.ENSP00000287934	0	FALSE	interacts with	FRZB (interacts with) FZD1
0.893	564	0.072	0.898	0	24	0.053	0	0	interacts with	FRZB (interacts with) WIF1	0	9606.ENSP00000295113	9606.ENSP00000286574	0	FALSE	interacts with	FRZB (interacts with) WIF1
0.167	566	0.08	0.201	0	24	0	0	0.727	interacts with	FRZB (interacts with) FZD7	0	9606.ENSP00000295113	9606.ENSP00000286201	0	FALSE	interacts with	FRZB (interacts with) FZD7
0.544	568	0	0.607	0	24	0.173	0	0	interacts with	FRZB (interacts with) WNT7A	0	9606.ENSP00000295113	9606.ENSP00000285018	0	FALSE	interacts with	FRZB (interacts with) WNT7A
0.4	570	0.087	0.429	0	24	0	0	0.66	interacts with	FRZB (interacts with) SFRP2	0	9606.ENSP00000295113	9606.ENSP00000274063	0	FALSE	interacts with	FRZB (interacts with) SFRP2
0.544	572	0	0.607	0	24	0.173	0	0	interacts with	FRZB (interacts with) WNT9A	0	9606.ENSP00000295113	9606.ENSP00000272164	0	FALSE	interacts with	FRZB (interacts with) WNT9A
0.327	574	0.042	0.341	0	24	0.06	0	0	interacts with	FRZB (interacts with) NKD1	0	9606.ENSP00000295113	9606.ENSP00000268459	0	FALSE	interacts with	FRZB (interacts with) NKD1
0.389	576	0.08	0.414	0	25.5625	0	0	0.66	interacts with	FRZB (interacts with) SFRP5	0	9606.ENSP00000295113	9606.ENSP00000266066	0	FALSE	interacts with	FRZB (interacts with) SFRP5
0.574	578	0.062	0.641	0	24	0.173	0	0	interacts with	FRZB (interacts with) WNT2	0	9606.ENSP00000295113	9606.ENSP00000265441	0	FALSE	interacts with	FRZB (interacts with) WNT2
0.539	580	0	0.558	0	24	0.08	0	0	interacts with	FRZB (interacts with) LRP6	0	9606.ENSP00000295113	9606.ENSP00000261349	0	FALSE	interacts with	FRZB (interacts with) LRP6
0.453	582	0	0.529	0	24	0.173	0	0	interacts with	FRZB (interacts with) WNT10A	0	9606.ENSP00000295113	9606.ENSP00000258411	0	FALSE	interacts with	FRZB (interacts with) WNT10A
0.173	584	0	0.173	0	29	0	0	0.653	interacts with	FRZB (interacts with) FZD3	0	9606.ENSP00000295113	9606.ENSP00000240093	0	FALSE	interacts with	FRZB (interacts with) FZD3
0.636	586	0.042	0.686	0	24	0.173	0	0	interacts with	FRZB (interacts with) WNT6	0	9606.ENSP00000295113	9606.ENSP00000233948	0	FALSE	interacts with	FRZB (interacts with) WNT6
0.151	588	0.042	0.152	0	30.25	0	0	0.672	interacts with	FRZB (interacts with) FZD10	0	9606.ENSP00000295113	9606.ENSP00000229030	0	FALSE	interacts with	FRZB (interacts with) FZD10
0.522	590	0	0.588	0	24	0.173	0	0	interacts with	FRZB (interacts with) WNT3	0	9606.ENSP00000295113	9606.ENSP00000225512	0	FALSE	interacts with	FRZB (interacts with) WNT3
0.545	592	0	0.607	0	24	0.173	0	0	interacts with	FRZB (interacts with) WNT16	0	9606.ENSP00000295113	9606.ENSP00000222462	0	FALSE	interacts with	FRZB (interacts with) WNT16
0.416	594	0.123	0.466	0	24	0	0	0.644	interacts with	FRZB (interacts with) SFRP1	0	9606.ENSP00000295113	9606.ENSP00000220772	0	FALSE	interacts with	FRZB (interacts with) SFRP1
0.466	596	0.057	0.726	0.5	23	0	0	0.788	interacts with	WNT10B (interacts with) WNT8A	0	9606.ENSP00000301061	9606.ENSP00000426653	0	FALSE	interacts with	WNT10B (interacts with) WNT8A
0.425	598	0.059	0.706	0.5	23	0	0	0.89	interacts with	WNT10B (interacts with) WNT7B	0	9606.ENSP00000301061	9606.ENSP00000341032	0	FALSE	interacts with	WNT10B (interacts with) WNT7B
0.192	602	0.059	0.587	0.5	23	0	0	0.801	interacts with	WNT10B (interacts with) WNT8B	0	9606.ENSP00000301061	9606.ENSP00000340677	0	FALSE	interacts with	WNT10B (interacts with) WNT8B
0.164	604	0.057	0.571	0.5	26.1111	0	0	0.854	interacts with	WNT10B (interacts with) WNT5B	0	9606.ENSP00000301061	9606.ENSP00000380379	0	FALSE	interacts with	WNT10B (interacts with) WNT5B
0.137	606	0.057	0.558	0.5	23	0	0	0.853	interacts with	WNT10B (interacts with) WNT11	0	9606.ENSP00000301061	9606.ENSP00000325526	0	FALSE	interacts with	WNT10B (interacts with) WNT11
0.16	608	0.042	0.562	0.5	25	0	0	0.849	interacts with	WNT10B (interacts with) WNT9B	0	9606.ENSP00000301061	9606.ENSP00000290015	0	FALSE	interacts with	WNT10B (interacts with) WNT9B
0.436	610	0.063	0.712	0.5	23	0	0	0.891	interacts with	WNT10B (interacts with) WNT7A	0	9606.ENSP00000301061	9606.ENSP00000285018	0	FALSE	interacts with	WNT10B (interacts with) WNT7A
0.179	612	0	0.572	0.5	25	0	0	0.823	interacts with	WNT10B (interacts with) WNT9A	0	9606.ENSP00000301061	9606.ENSP00000272164	0	FALSE	interacts with	WNT10B (interacts with) WNT9A
0.445	614	0.058	0.716	0.5	23	0	0	0.862	interacts with	WNT10B (interacts with) WNT2	0	9606.ENSP00000301061	9606.ENSP00000265441	0	FALSE	interacts with	WNT10B (interacts with) WNT2
0.191	616	0.133	0.619	0.5	23	0	0	0.882	interacts with	WNT10B (interacts with) WNT6	0	9606.ENSP00000301061	9606.ENSP00000233948	0	FALSE	interacts with	WNT10B (interacts with) WNT6
0.465	618	0.057	0.731	0.5	23	0	0	0.878	interacts with	WNT10B (interacts with) WNT3	0	9606.ENSP00000301061	9606.ENSP00000225512	0.062	FALSE	interacts with	WNT10B (interacts with) WNT3
0.151	620	0.057	0.564	0.5	27.6667	0	0	0.833	interacts with	WNT10B (interacts with) WNT16	0	9606.ENSP00000301061	9606.ENSP00000222462	0	FALSE	interacts with	WNT10B (interacts with) WNT16
0.413	622	0	0.815	0.65	22	0.173	0	0	interacts with	SFRP4 (interacts with) WNT8A	0	9606.ENSP00000410715	9606.ENSP00000426653	0	FALSE	interacts with	SFRP4 (interacts with) WNT8A
0.662	624	0	0.893	0.65	22	0.173	0	0	interacts with	SFRP4 (interacts with) WNT5B	0	9606.ENSP00000410715	9606.ENSP00000380379	0	FALSE	interacts with	SFRP4 (interacts with) WNT5B
0.262	628	0.048	0.368	0	23.4706	0.172	0	0	interacts with	SFRP4 (interacts with) VANGL2	0	9606.ENSP00000410715	9606.ENSP00000357040	0	FALSE	interacts with	SFRP4 (interacts with) VANGL2
0.267	630	0.043	0.268	0	24.9444	0	0	0	interacts with	SFRP4 (interacts with) WLS	0	9606.ENSP00000410715	9606.ENSP00000346829	0	FALSE	interacts with	SFRP4 (interacts with) WLS
0.505	632	0	0.844	0.65	22	0.173	0	0	interacts with	SFRP4 (interacts with) WNT7B	0	9606.ENSP00000410715	9606.ENSP00000341032	0	FALSE	interacts with	SFRP4 (interacts with) WNT7B
0.375	634	0	0.803	0.65	22	0.173	0	0	interacts with	SFRP4 (interacts with) WNT8B	0	9606.ENSP00000410715	9606.ENSP00000340677	0	FALSE	interacts with	SFRP4 (interacts with) WNT8B
0.468	636	0.049	0.834	0.65	22	0.173	0	0	interacts with	SFRP4 (interacts with) WNT11	0	9606.ENSP00000410715	9606.ENSP00000325526	0	FALSE	interacts with	SFRP4 (interacts with) WNT11
0.497	638	0	0.841	0.65	22	0.173	0	0	interacts with	SFRP4 (interacts with) WNT10B	0	9606.ENSP00000410715	9606.ENSP00000301061	0	FALSE	interacts with	SFRP4 (interacts with) WNT10B
0.313	640	0	0.784	0.65	22	0.173	0	0	interacts with	SFRP4 (interacts with) WNT9B	0	9606.ENSP00000410715	9606.ENSP00000290015	0	FALSE	interacts with	SFRP4 (interacts with) WNT9B
0.671	642	0.049	0.678	0	22	0.053	0	0	interacts with	SFRP4 (interacts with) WIF1	0	9606.ENSP00000410715	9606.ENSP00000286574	0	FALSE	interacts with	SFRP4 (interacts with) WIF1
0.674	644	0	0.897	0.65	22	0.173	0	0	interacts with	SFRP4 (interacts with) WNT7A	0	9606.ENSP00000410715	9606.ENSP00000285018	0	FALSE	interacts with	SFRP4 (interacts with) WNT7A
0.412	646	0	0.815	0.65	22	0.173	0	0	interacts with	SFRP4 (interacts with) WNT9A	0	9606.ENSP00000410715	9606.ENSP00000272164	0	FALSE	interacts with	SFRP4 (interacts with) WNT9A
0.397	648	0.067	0.413	0	45.5625	0	0	0.624	interacts with	SFRP4 (interacts with) SFRP5	0	9606.ENSP00000410715	9606.ENSP00000266066	0	FALSE	interacts with	SFRP4 (interacts with) SFRP5
0.646	650	0.147	0.9	0.65	22	0.173	0	0	interacts with	SFRP4 (interacts with) WNT2	0	9606.ENSP00000410715	9606.ENSP00000265441	0	FALSE	interacts with	SFRP4 (interacts with) WNT2
0.42	652	0	0.817	0.65	22	0.173	0	0	interacts with	SFRP4 (interacts with) WNT10A	0	9606.ENSP00000410715	9606.ENSP00000258411	0	FALSE	interacts with	SFRP4 (interacts with) WNT10A
0.607	654	0	0.876	0.65	22	0.173	0	0	interacts with	SFRP4 (interacts with) WNT6	0	9606.ENSP00000410715	9606.ENSP00000233948	0	FALSE	interacts with	SFRP4 (interacts with) WNT6
0.66	656	0	0.893	0.65	22	0.173	0	0	interacts with	SFRP4 (interacts with) WNT3	0	9606.ENSP00000410715	9606.ENSP00000225512	0	FALSE	interacts with	SFRP4 (interacts with) WNT3
0.603	658	0	0.875	0.65	22	0.173	0	0	interacts with	SFRP4 (interacts with) WNT16	0	9606.ENSP00000410715	9606.ENSP00000222462	0	FALSE	interacts with	SFRP4 (interacts with) WNT16
0.694	660	0	0.91	0.65	21	0.234	0	0	interacts with	SFRP2 (interacts with) WNT7B	0	9606.ENSP00000274063	9606.ENSP00000341032	0	FALSE	interacts with	SFRP2 (interacts with) WNT7B
0.564	662	0.096	0.88	0.65	21	0.234	0	0	interacts with	SFRP2 (interacts with) WNT11	0	9606.ENSP00000274063	9606.ENSP00000325526	0	FALSE	interacts with	SFRP2 (interacts with) WNT11
0.552	666	0	0.869	0.65	21	0.234	0	0	interacts with	SFRP2 (interacts with) WNT7A	0	9606.ENSP00000274063	9606.ENSP00000285018	0	FALSE	interacts with	SFRP2 (interacts with) WNT7A
0.498	668	0	0.853	0.65	21	0.234	0	0	interacts with	SFRP2 (interacts with) WNT5B	0	9606.ENSP00000274063	9606.ENSP00000380379	0	FALSE	interacts with	SFRP2 (interacts with) WNT5B
0.497	670	0	0.841	0.65	21	0.173	0	0	interacts with	SFRP2 (interacts with) WNT10B	0	9606.ENSP00000274063	9606.ENSP00000301061	0	FALSE	interacts with	SFRP2 (interacts with) WNT10B
0.446	672	0	0.838	0.65	21	0.234	0	0	interacts with	SFRP2 (interacts with) WNT8B	0	9606.ENSP00000274063	9606.ENSP00000340677	0	FALSE	interacts with	SFRP2 (interacts with) WNT8B
0.356	674	0	0.812	0.65	21	0.234	0	0	interacts with	SFRP2 (interacts with) WNT8A	0	9606.ENSP00000274063	9606.ENSP00000426653	0	FALSE	interacts with	SFRP2 (interacts with) WNT8A
0.363	676	0	0.799	0.65	21	0.173	0	0	interacts with	SFRP2 (interacts with) WNT9B	0	9606.ENSP00000274063	9606.ENSP00000290015	0	FALSE	interacts with	SFRP2 (interacts with) WNT9B
0.736	678	0.077	0.753	0	21	0.067	0	0	interacts with	SFRP2 (interacts with) WIF1	0	9606.ENSP00000274063	9606.ENSP00000286574	0	FALSE	interacts with	SFRP2 (interacts with) WIF1
0.427	680	0.425	0.656	0	25.5	0	0	0.632	interacts with	SFRP2 (interacts with) SFRP4	0	9606.ENSP00000274063	9606.ENSP00000410715	0	FALSE	interacts with	SFRP2 (interacts with) SFRP4
0.377	682	0.115	0.504	0	22.4706	0.172	0	0	interacts with	SFRP2 (interacts with) VANGL2	0	9606.ENSP00000274063	9606.ENSP00000357040	0	FALSE	interacts with	SFRP2 (interacts with) VANGL2
0.287	684	0.044	0.289	0	23.9444	0	0	0	interacts with	SFRP2 (interacts with) WLS	0	9606.ENSP00000274063	9606.ENSP00000346829	0	FALSE	interacts with	SFRP2 (interacts with) WLS
0.525	686	0	0.85	0.65	21	0.173	0	0	interacts with	SFRP2 (interacts with) WNT9A	0	9606.ENSP00000274063	9606.ENSP00000272164	0	FALSE	interacts with	SFRP2 (interacts with) WNT9A
0.155	688	0	0.359	0	38.0625	0.272	0	0.898	interacts with	SFRP2 (interacts with) SFRP5	0	9606.ENSP00000274063	9606.ENSP00000266066	0	FALSE	interacts with	SFRP2 (interacts with) SFRP5
0.664	690	0.057	0.903	0.65	21	0.234	0	0	interacts with	SFRP2 (interacts with) WNT2	0	9606.ENSP00000274063	9606.ENSP00000265441	0	FALSE	interacts with	SFRP2 (interacts with) WNT2
0.452	692	0	0.827	0.65	21	0.173	0	0	interacts with	SFRP2 (interacts with) WNT10A	0	9606.ENSP00000274063	9606.ENSP00000258411	0	FALSE	interacts with	SFRP2 (interacts with) WNT10A
0.519	694	0	0.859	0.65	21	0.234	0	0	interacts with	SFRP2 (interacts with) WNT6	0	9606.ENSP00000274063	9606.ENSP00000233948	0	FALSE	interacts with	SFRP2 (interacts with) WNT6
0.475	696	0	0.847	0.65	21	0.234	0	0	interacts with	SFRP2 (interacts with) WNT3	0	9606.ENSP00000274063	9606.ENSP00000225512	0	FALSE	interacts with	SFRP2 (interacts with) WNT3
0.43	698	0	0.834	0.65	21	0.234	0	0	interacts with	SFRP2 (interacts with) WNT16	0	9606.ENSP00000274063	9606.ENSP00000222462	0	FALSE	interacts with	SFRP2 (interacts with) WNT16
0.527	718	0.058	0.969	0.9	19	0.405	0	0	interacts with	WIF1 (interacts with) WNT11	0	9606.ENSP00000286574	9606.ENSP00000325526	0	FALSE	interacts with	WIF1 (interacts with) WNT11
0.516	720	0	0.949	0.9	19	0	0	0	interacts with	WIF1 (interacts with) WNT10B	0	9606.ENSP00000286574	9606.ENSP00000301061	0	FALSE	interacts with	WIF1 (interacts with) WNT10B
0.494	724	0	0.947	0.9	19	0	0	0	interacts with	WIF1 (interacts with) WNT7B	0	9606.ENSP00000286574	9606.ENSP00000341032	0	FALSE	interacts with	WIF1 (interacts with) WNT7B
0.447	726	0	0.942	0.9	19	0	0	0	interacts with	WIF1 (interacts with) WNT5B	0	9606.ENSP00000286574	9606.ENSP00000380379	0	FALSE	interacts with	WIF1 (interacts with) WNT5B
0.357	728	0	0.933	0.9	19	0	0	0	interacts with	WIF1 (interacts with) WNT9B	0	9606.ENSP00000286574	9606.ENSP00000290015	0	FALSE	interacts with	WIF1 (interacts with) WNT9B
0.353	730	0	0.932	0.9	19	0	0	0	interacts with	WIF1 (interacts with) WNT8A	0	9606.ENSP00000286574	9606.ENSP00000426653	0	FALSE	interacts with	WIF1 (interacts with) WNT8A
0.355	732	0	0.932	0.9	19	0	0	0	interacts with	WIF1 (interacts with) WNT8B	0	9606.ENSP00000286574	9606.ENSP00000340677	0	FALSE	interacts with	WIF1 (interacts with) WNT8B
0.259	734	0.048	0.264	0	21.9444	0	0	0	interacts with	WIF1 (interacts with) WLS	0	9606.ENSP00000286574	9606.ENSP00000346829	0	FALSE	interacts with	WIF1 (interacts with) WLS
0.701	736	0	0.987	0.9	19	0.622	0	0	interacts with	WIF1 (interacts with) WNT7A	0	9606.ENSP00000286574	9606.ENSP00000285018	0	FALSE	interacts with	WIF1 (interacts with) WNT7A
0.487	738	0	0.946	0.9	19	0	0	0	interacts with	WIF1 (interacts with) WNT9A	0	9606.ENSP00000286574	9606.ENSP00000272164	0	FALSE	interacts with	WIF1 (interacts with) WNT9A
0.641	740	0.062	0.963	0.9	19	0	0	0	interacts with	WIF1 (interacts with) WNT2	0	9606.ENSP00000286574	9606.ENSP00000265441	0	FALSE	interacts with	WIF1 (interacts with) WNT2
0.479	742	0	0.945	0.9	19	0	0	0	interacts with	WIF1 (interacts with) WNT10A	0	9606.ENSP00000286574	9606.ENSP00000258411	0	FALSE	interacts with	WIF1 (interacts with) WNT10A
0.499	744	0	0.947	0.9	19	0	0	0	interacts with	WIF1 (interacts with) WNT6	0	9606.ENSP00000286574	9606.ENSP00000233948	0	FALSE	interacts with	WIF1 (interacts with) WNT6
0.449	746	0	0.942	0.9	19	0	0	0	interacts with	WIF1 (interacts with) WNT3	0	9606.ENSP00000286574	9606.ENSP00000225512	0	FALSE	interacts with	WIF1 (interacts with) WNT3
0.505	748	0	0.948	0.9	19	0	0	0	interacts with	WIF1 (interacts with) WNT16	0	9606.ENSP00000286574	9606.ENSP00000222462	0	FALSE	interacts with	WIF1 (interacts with) WNT16
0.153	752	0.122	0.611	0.5	18	0	0	0.82	interacts with	WNT11 (interacts with) WNT8B	0	9606.ENSP00000325526	9606.ENSP00000340677	0.078	FALSE	interacts with	WNT11 (interacts with) WNT8B
0.162	754	0	0.563	0.5	18	0	0	0.822	interacts with	WNT11 (interacts with) WNT8A	0	9606.ENSP00000325526	9606.ENSP00000426653	0	FALSE	interacts with	WNT11 (interacts with) WNT8A
0.126	756	0.042	0.559	0.5	18	0	0	0.879	interacts with	WNT11 (interacts with) WNT7B	0	9606.ENSP00000325526	9606.ENSP00000341032	0.07	FALSE	interacts with	WNT11 (interacts with) WNT7B
0.122	758	0	0.551	0.5	21.1111	0	0	0.888	interacts with	WNT11 (interacts with) WNT5B	0	9606.ENSP00000325526	9606.ENSP00000380379	0.059	FALSE	interacts with	WNT11 (interacts with) WNT5B
0.166	760	0.055	0.588	0.5	20	0.08	0	0.816	interacts with	WNT11 (interacts with) WNT9B	0	9606.ENSP00000325526	9606.ENSP00000290015	0	FALSE	interacts with	WNT11 (interacts with) WNT9B
0.129	762	0	0.546	0.5	18	0	0	0.875	interacts with	WNT11 (interacts with) WNT7A	0	9606.ENSP00000325526	9606.ENSP00000285018	0	FALSE	interacts with	WNT11 (interacts with) WNT7A
0.472	764	0.055	0.739	0.5	20	0.08	0	0.816	interacts with	WNT11 (interacts with) WNT9A	0	9606.ENSP00000325526	9606.ENSP00000272164	0	FALSE	interacts with	WNT11 (interacts with) WNT9A
0.127	766	0.056	0.561	0.5	18	0	0	0.868	interacts with	WNT11 (interacts with) WNT2	0	9606.ENSP00000325526	9606.ENSP00000265441	0.061	FALSE	interacts with	WNT11 (interacts with) WNT2
0.148	768	0.082	0.575	0.5	18	0	0	0.856	interacts with	WNT11 (interacts with) WNT6	0	9606.ENSP00000325526	9606.ENSP00000233948	0	FALSE	interacts with	WNT11 (interacts with) WNT6
0.131	770	0.067	0.569	0.5	18	0	0	0.884	interacts with	WNT11 (interacts with) WNT3	0	9606.ENSP00000325526	9606.ENSP00000225512	0.062	FALSE	interacts with	WNT11 (interacts with) WNT3
0.439	772	0	0.889	0.5	22.6667	0.639	0	0.879	interacts with	WNT11 (interacts with) WNT16	0	9606.ENSP00000325526	9606.ENSP00000222462	0	FALSE	interacts with	WNT11 (interacts with) WNT16
0.129	774	0	0.545	0.5	17	0	0	0.86	interacts with	WNT5B (interacts with) WNT8A	0	9606.ENSP00000380379	9606.ENSP00000426653	0	FALSE	interacts with	WNT5B (interacts with) WNT8A
0.098	776	0.044	0.538	0.5	17	0	0	0.931	interacts with	WNT5B (interacts with) WNT7B	0	9606.ENSP00000380379	9606.ENSP00000341032	0.056	FALSE	interacts with	WNT5B (interacts with) WNT7B
0.131	778	0	0.546	0.5	17	0	0	0.863	interacts with	WNT5B (interacts with) WNT8B	0	9606.ENSP00000380379	9606.ENSP00000340677	0	FALSE	interacts with	WNT5B (interacts with) WNT8B
0.157	780	0.055	0.584	0.5	17	0.08	0	0.822	interacts with	WNT5B (interacts with) WNT9B	0	9606.ENSP00000380379	9606.ENSP00000290015	0	FALSE	interacts with	WNT5B (interacts with) WNT9B
0.105	782	0.042	0.54	0.5	17	0	0	0.924	interacts with	WNT5B (interacts with) WNT7A	0	9606.ENSP00000380379	9606.ENSP00000285018	0.054	FALSE	interacts with	WNT5B (interacts with) WNT7A
0.164	784	0.057	0.589	0.5	17	0.08	0	0.822	interacts with	WNT5B (interacts with) WNT9A	0	9606.ENSP00000380379	9606.ENSP00000272164	0	FALSE	interacts with	WNT5B (interacts with) WNT9A
0.138	786	0.056	0.557	0.5	17	0	0	0.884	interacts with	WNT5B (interacts with) WNT6	0	9606.ENSP00000380379	9606.ENSP00000233948	0	FALSE	interacts with	WNT5B (interacts with) WNT6
0.173	788	0.044	0.581	0.5	16	0	0	0.845	interacts with	WNT10A (interacts with) WNT9A	0	9606.ENSP00000258411	9606.ENSP00000272164	0.065	FALSE	interacts with	WNT10A (interacts with) WNT9A
0.173	790	0.057	0.576	0.5	16	0	0	0.816	interacts with	WNT10A (interacts with) WNT8B	0	9606.ENSP00000258411	9606.ENSP00000340677	0	FALSE	interacts with	WNT10A (interacts with) WNT8B
0.168	792	0.057	0.573	0.5	16	0	0	0.806	interacts with	WNT10A (interacts with) WNT8A	0	9606.ENSP00000258411	9606.ENSP00000426653	0	FALSE	interacts with	WNT10A (interacts with) WNT8A
0.167	794	0.042	0.566	0.5	16	0	0	0.843	interacts with	WNT10A (interacts with) WNT9B	0	9606.ENSP00000258411	9606.ENSP00000290015	0	FALSE	interacts with	WNT10A (interacts with) WNT9B
0.143	796	0.062	0.563	0.5	16	0	0	0.845	interacts with	WNT10A (interacts with) WNT11	0	9606.ENSP00000258411	9606.ENSP00000325526	0	FALSE	interacts with	WNT10A (interacts with) WNT11
0.113	798	0.078	0.555	0.5	16	0	0	0.894	interacts with	WNT10A (interacts with) WNT7A	0	9606.ENSP00000258411	9606.ENSP00000285018	0	FALSE	interacts with	WNT10A (interacts with) WNT7A
0.116	800	0.062	0.549	0.5	16	0	0	0.896	interacts with	WNT10A (interacts with) WNT7B	0	9606.ENSP00000258411	9606.ENSP00000341032	0	FALSE	interacts with	WNT10A (interacts with) WNT7B
0.12	804	0.057	0.548	0.5	16	0	0	0.88	interacts with	WNT10A (interacts with) WNT5B	0	9606.ENSP00000258411	9606.ENSP00000380379	0	FALSE	interacts with	WNT10A (interacts with) WNT5B
0.111	806	0.057	0.544	0.5	16	0	0	0.871	interacts with	WNT10A (interacts with) WNT2	0	9606.ENSP00000258411	9606.ENSP00000265441	0	FALSE	interacts with	WNT10A (interacts with) WNT2
0.074	808	0.049	0.53	0.5	16	0	0	0.964	interacts with	WNT10A (interacts with) WNT10B	0	9606.ENSP00000258411	9606.ENSP00000301061	0.058	FALSE	interacts with	WNT10A (interacts with) WNT10B
0.165	810	0.137	0.608	0.5	16	0	0	0.877	interacts with	WNT10A (interacts with) WNT6	0	9606.ENSP00000258411	9606.ENSP00000233948	0	FALSE	interacts with	WNT10A (interacts with) WNT6
0.116	812	0.064	0.56	0.5	16	0	0	0.889	interacts with	WNT10A (interacts with) WNT3	0	9606.ENSP00000258411	9606.ENSP00000225512	0.061	FALSE	interacts with	WNT10A (interacts with) WNT3
0.14	814	0.057	0.616	0.5	16	0.164	0	0.847	interacts with	WNT10A (interacts with) WNT16	0	9606.ENSP00000258411	9606.ENSP00000222462	0	FALSE	interacts with	WNT10A (interacts with) WNT16
0.997	816	0	0.999	0.9	15.9375	0.183	0	0	interacts with	DKK2 (interacts with) LRP5	0	9606.ENSP00000285311	9606.ENSP00000294304	0	FALSE	interacts with	DKK2 (interacts with) LRP5
0.75	820	0.072	0.848	0.4	24.0625	0	0	0	interacts with	DKK2 (interacts with) FZD1	0	9606.ENSP00000285311	9606.ENSP00000287934	0	FALSE	interacts with	DKK2 (interacts with) FZD1
0.555	822	0	0.838	0.65	15	0.045	0	0	interacts with	DKK2 (interacts with) WNT10B	0	9606.ENSP00000285311	9606.ENSP00000301061	0	FALSE	interacts with	DKK2 (interacts with) WNT10B
0.827	824	0.067	0.832	0	17.8125	0	0	0	interacts with	DKK2 (interacts with) FRZB	0	9606.ENSP00000285311	9606.ENSP00000295113	0	FALSE	interacts with	DKK2 (interacts with) FRZB
0.529	826	0	0.829	0.65	15	0.045	0	0	interacts with	DKK2 (interacts with) WNT7B	0	9606.ENSP00000285311	9606.ENSP00000341032	0	FALSE	interacts with	DKK2 (interacts with) WNT7B
0.518	828	0.064	0.829	0.65	15	0.045	0	0	interacts with	DKK2 (interacts with) WNT11	0	9606.ENSP00000285311	9606.ENSP00000325526	0	FALSE	interacts with	DKK2 (interacts with) WNT11
0.493	830	0.042	0.816	0.65	15	0.045	0	0	interacts with	DKK2 (interacts with) WNT5B	0	9606.ENSP00000285311	9606.ENSP00000380379	0	FALSE	interacts with	DKK2 (interacts with) WNT5B
0.778	832	0.141	0.802	0	15	0	0	0	interacts with	DKK2 (interacts with) WIF1	0	9606.ENSP00000285311	9606.ENSP00000286574	0	FALSE	interacts with	DKK2 (interacts with) WIF1
0.776	834	0.045	0.777	0	17.8125	0	0	0	interacts with	DKK2 (interacts with) FZD8	0	9606.ENSP00000285311	9606.ENSP00000363826	0	FALSE	interacts with	DKK2 (interacts with) FZD8
0.376	836	0	0.773	0.65	15	0.045	0	0	interacts with	DKK2 (interacts with) WNT9B	0	9606.ENSP00000285311	9606.ENSP00000290015	0	FALSE	interacts with	DKK2 (interacts with) WNT9B
0.355	838	0	0.765	0.65	15	0.045	0	0	interacts with	DKK2 (interacts with) WNT8B	0	9606.ENSP00000285311	9606.ENSP00000340677	0	FALSE	interacts with	DKK2 (interacts with) WNT8B
0.336	840	0	0.758	0.65	15	0.045	0	0	interacts with	DKK2 (interacts with) WNT8A	0	9606.ENSP00000285311	9606.ENSP00000426653	0	FALSE	interacts with	DKK2 (interacts with) WNT8A
0.705	842	0	0.708	0	24.2708	0.051	0	0	interacts with	DKK2 (interacts with) DVL1	0	9606.ENSP00000285311	9606.ENSP00000368166	0	FALSE	interacts with	DKK2 (interacts with) DVL1
0.469	844	0.044	0.669	0.4	17.8125	0	0	0	interacts with	DKK2 (interacts with) FZD2	0	9606.ENSP00000285311	9606.ENSP00000323901	0	FALSE	interacts with	DKK2 (interacts with) FZD2
0.599	846	0.109	0.628	0	15	0	0	0	interacts with	DKK2 (interacts with) SFRP4	0	9606.ENSP00000285311	9606.ENSP00000410715	0	FALSE	interacts with	DKK2 (interacts with) SFRP4
0.499	848	0	0.499	0	17.8125	0	0	0	interacts with	DKK2 (interacts with) FZD4	0	9606.ENSP00000285311	9606.ENSP00000434034	0	FALSE	interacts with	DKK2 (interacts with) FZD4
0.486	850	0	0.486	0	16.7857	0	0	0	interacts with	DKK2 (interacts with) RYK	0	9606.ENSP00000285311	9606.ENSP00000478721	0	FALSE	interacts with	DKK2 (interacts with) RYK
0.457	852	0.056	0.465	0	17.8125	0	0	0	interacts with	DKK2 (interacts with) FZD7	0	9606.ENSP00000285311	9606.ENSP00000286201	0	FALSE	interacts with	DKK2 (interacts with) FZD7
0.453	854	0	0.453	0	17.8125	0	0	0	interacts with	DKK2 (interacts with) FZD5	0	9606.ENSP00000285311	9606.ENSP00000354607	0	FALSE	interacts with	DKK2 (interacts with) FZD5
0.434	856	0.056	0.443	0	15	0	0	0	interacts with	DKK2 (interacts with) NOTUM	0	9606.ENSP00000285311	9606.ENSP00000387310	0	FALSE	interacts with	DKK2 (interacts with) NOTUM
0.424	858	0	0.424	0	15.9375	0	0	0	interacts with	DKK2 (interacts with) FZD9	0	9606.ENSP00000285311	9606.ENSP00000345785	0	FALSE	interacts with	DKK2 (interacts with) FZD9
0.348	860	0	0.41	0	20.4375	0.133	0	0	interacts with	DKK2 (interacts with) LRP5L	0	9606.ENSP00000285311	9606.ENSP00000482378	0	FALSE	interacts with	DKK2 (interacts with) LRP5L
0.404	862	0	0.404	0	19.5089	0	0	0	interacts with	DKK2 (interacts with) FZD6	0	9606.ENSP00000285311	9606.ENSP00000351605	0	FALSE	interacts with	DKK2 (interacts with) FZD6
0.321	864	0.067	0.339	0	16.3889	0	0	0	interacts with	DKK2 (interacts with) WLS	0	9606.ENSP00000285311	9606.ENSP00000346829	0	FALSE	interacts with	DKK2 (interacts with) WLS
0.334	866	0	0.334	0	16.7857	0	0	0	interacts with	DKK2 (interacts with) PORCN	0	9606.ENSP00000285311	9606.ENSP00000322304	0	FALSE	interacts with	DKK2 (interacts with) PORCN
0.315	868	0	0.322	0	24.2708	0.051	0	0	interacts with	DKK2 (interacts with) DVL3	0	9606.ENSP00000285311	9606.ENSP00000316054	0	FALSE	interacts with	DKK2 (interacts with) DVL3
0.269	870	0.047	0.297	0	17.0833	0.071	0	0	interacts with	DKK2 (interacts with) ROR2	0	9606.ENSP00000285311	9606.ENSP00000364860	0	FALSE	interacts with	DKK2 (interacts with) ROR2
0.261	872	0.044	0.263	0	16.9231	0	0	0	interacts with	DKK2 (interacts with) NKD2	0	9606.ENSP00000285311	9606.ENSP00000296849	0	FALSE	interacts with	DKK2 (interacts with) NKD2
0.249	874	0	0.249	0	16.4706	0	0	0	interacts with	DKK2 (interacts with) VANGL2	0	9606.ENSP00000285311	9606.ENSP00000357040	0	FALSE	interacts with	DKK2 (interacts with) VANGL2
0.504	876	0	0.82	0.65	15	0.045	0	0	interacts with	DKK2 (interacts with) WNT7A	0	9606.ENSP00000285311	9606.ENSP00000285018	0	FALSE	interacts with	DKK2 (interacts with) WNT7A
0.724	878	0.059	0.73	0	15	0	0	0	interacts with	DKK2 (interacts with) SFRP2	0	9606.ENSP00000285311	9606.ENSP00000274063	0	FALSE	interacts with	DKK2 (interacts with) SFRP2
0.424	880	0	0.79	0.65	15	0.045	0	0	interacts with	DKK2 (interacts with) WNT9A	0	9606.ENSP00000285311	9606.ENSP00000272164	0	FALSE	interacts with	DKK2 (interacts with) WNT9A
0.417	882	0.058	0.427	0	15	0	0	0	interacts with	DKK2 (interacts with) NKD1	0	9606.ENSP00000285311	9606.ENSP00000268459	0	FALSE	interacts with	DKK2 (interacts with) NKD1
0.598	884	0	0.598	0	16.5625	0	0	0	interacts with	DKK2 (interacts with) SFRP5	0	9606.ENSP00000285311	9606.ENSP00000266066	0	FALSE	interacts with	DKK2 (interacts with) SFRP5
0.694	886	0.085	0.894	0.65	15	0.045	0	0	interacts with	DKK2 (interacts with) WNT2	0	9606.ENSP00000285311	9606.ENSP00000265441	0	FALSE	interacts with	DKK2 (interacts with) WNT2
0.997	888	0	0.999	0.9	15.9375	0.471	0	0	interacts with	DKK2 (interacts with) LRP6	0	9606.ENSP00000285311	9606.ENSP00000261349	0	FALSE	interacts with	DKK2 (interacts with) LRP6
0.491	890	0	0.815	0.65	15	0.045	0	0	interacts with	DKK2 (interacts with) WNT10A	0	9606.ENSP00000285311	9606.ENSP00000258411	0	FALSE	interacts with	DKK2 (interacts with) WNT10A
0.436	892	0	0.436	0	20.9375	0	0	0	interacts with	DKK2 (interacts with) FZD3	0	9606.ENSP00000285311	9606.ENSP00000240093	0	FALSE	interacts with	DKK2 (interacts with) FZD3
0.874	894	0	0.954	0.65	15	0.045	0	0	interacts with	DKK2 (interacts with) WNT6	0	9606.ENSP00000285311	9606.ENSP00000233948	0	FALSE	interacts with	DKK2 (interacts with) WNT6
0.397	896	0.064	0.411	0	24.0625	0	0	0	interacts with	DKK2 (interacts with) FZD10	0	9606.ENSP00000285311	9606.ENSP00000229030	0	FALSE	interacts with	DKK2 (interacts with) FZD10
0.513	898	0	0.823	0.65	15	0.045	0	0	interacts with	DKK2 (interacts with) WNT3	0	9606.ENSP00000285311	9606.ENSP00000225512	0	FALSE	interacts with	DKK2 (interacts with) WNT3
0.461	900	0.045	0.805	0.65	15	0.045	0	0	interacts with	DKK2 (interacts with) WNT16	0	9606.ENSP00000285311	9606.ENSP00000222462	0	FALSE	interacts with	DKK2 (interacts with) WNT16
0.16	902	0.058	0.913	0.9	15	0	0	0.853	interacts with	DKK2 (interacts with) DKK4	0	9606.ENSP00000285311	9606.ENSP00000220812	0	FALSE	interacts with	DKK2 (interacts with) DKK4
0.829	904	0.06	0.832	0	15	0	0	0	interacts with	DKK2 (interacts with) SFRP1	0	9606.ENSP00000285311	9606.ENSP00000220772	0	FALSE	interacts with	DKK2 (interacts with) SFRP1
0.352	906	0.082	0.418	0	14	0.1	0	0	interacts with	NKD2 (interacts with) WNT11	0	9606.ENSP00000296849	9606.ENSP00000325526	0	FALSE	interacts with	NKD2 (interacts with) WNT11
0.349	908	0	0.389	0	14	0.1	0	0	interacts with	NKD2 (interacts with) WNT5B	0	9606.ENSP00000296849	9606.ENSP00000380379	0	FALSE	interacts with	NKD2 (interacts with) WNT5B
0.333	910	0	0.374	0	14	0.1	0	0	interacts with	NKD2 (interacts with) WNT10B	0	9606.ENSP00000296849	9606.ENSP00000301061	0	FALSE	interacts with	NKD2 (interacts with) WNT10B
0.312	912	0.105	0.358	0	15.5556	0	0	0	interacts with	NKD2 (interacts with) NOTUM	0	9606.ENSP00000296849	9606.ENSP00000387310	0	FALSE	interacts with	NKD2 (interacts with) NOTUM
0.302	914	0	0.345	0	14	0.1	0	0	interacts with	NKD2 (interacts with) WNT7B	0	9606.ENSP00000296849	9606.ENSP00000341032	0	FALSE	interacts with	NKD2 (interacts with) WNT7B
0.301	916	0	0.329	0	29.5556	0.079	0	0	interacts with	NKD2 (interacts with) PORCN	0	9606.ENSP00000296849	9606.ENSP00000322304	0	FALSE	interacts with	NKD2 (interacts with) PORCN
0.298	918	0.06	0.326	0	15.5556	0.06	0	0	interacts with	NKD2 (interacts with) SFRP4	0	9606.ENSP00000296849	9606.ENSP00000410715	0	FALSE	interacts with	NKD2 (interacts with) SFRP4
0.254	920	0	0.3	0	14	0.1	0	0	interacts with	NKD2 (interacts with) WNT8A	0	9606.ENSP00000296849	9606.ENSP00000426653	0	FALSE	interacts with	NKD2 (interacts with) WNT8A
0.251	922	0	0.297	0	14	0.1	0	0	interacts with	NKD2 (interacts with) WNT8B	0	9606.ENSP00000296849	9606.ENSP00000340677	0	FALSE	interacts with	NKD2 (interacts with) WNT8B
0.231	926	0.063	0.249	0	15.5556	0	0	0	interacts with	NKD2 (interacts with) VANGL2	0	9606.ENSP00000296849	9606.ENSP00000357040	0	FALSE	interacts with	NKD2 (interacts with) VANGL2
0.164	928	0.063	0.183	0	15.5556	0	0	0	interacts with	NKD2 (interacts with) RYK	0	9606.ENSP00000296849	9606.ENSP00000478721	0	FALSE	interacts with	NKD2 (interacts with) RYK
0.255	930	0	0.301	0	14	0.1	0	0	interacts with	NKD2 (interacts with) WNT9B	0	9606.ENSP00000296849	9606.ENSP00000290015	0	FALSE	interacts with	NKD2 (interacts with) WNT9B
0.376	932	0	0.376	0	15.5556	0	0	0	interacts with	NKD2 (interacts with) WIF1	0	9606.ENSP00000296849	9606.ENSP00000286574	0	FALSE	interacts with	NKD2 (interacts with) WIF1
0.232	934	0	0.279	0	14	0.1	0	0	interacts with	NKD2 (interacts with) WNT7A	0	9606.ENSP00000296849	9606.ENSP00000285018	0	FALSE	interacts with	NKD2 (interacts with) WNT7A
0.392	936	0.105	0.444	0	15.5556	0.06	0	0	interacts with	NKD2 (interacts with) SFRP2	0	9606.ENSP00000296849	9606.ENSP00000274063	0	FALSE	interacts with	NKD2 (interacts with) SFRP2
0.275	938	0.042	0.32	0	14	0.1	0	0	interacts with	NKD2 (interacts with) WNT9A	0	9606.ENSP00000296849	9606.ENSP00000272164	0	FALSE	interacts with	NKD2 (interacts with) WNT9A
0.301	940	0.042	0.315	0	15.5556	0.06	0	0	interacts with	NKD2 (interacts with) SFRP5	0	9606.ENSP00000296849	9606.ENSP00000266066	0	FALSE	interacts with	NKD2 (interacts with) SFRP5
0.305	942	0.064	0.363	0	14	0.1	0	0	interacts with	NKD2 (interacts with) WNT2	0	9606.ENSP00000296849	9606.ENSP00000265441	0	FALSE	interacts with	NKD2 (interacts with) WNT2
0.324	944	0.048	0.37	0	14	0.1	0	0	interacts with	NKD2 (interacts with) WNT10A	0	9606.ENSP00000296849	9606.ENSP00000258411	0	FALSE	interacts with	NKD2 (interacts with) WNT10A
0.318	946	0.062	0.374	0	14	0.1	0	0	interacts with	NKD2 (interacts with) WNT6	0	9606.ENSP00000296849	9606.ENSP00000233948	0	FALSE	interacts with	NKD2 (interacts with) WNT6
0.262	948	0	0.307	0	14	0.1	0	0	interacts with	NKD2 (interacts with) WNT3	0	9606.ENSP00000296849	9606.ENSP00000225512	0	FALSE	interacts with	NKD2 (interacts with) WNT3
0.284	950	0	0.328	0	14	0.1	0	0	interacts with	NKD2 (interacts with) WNT16	0	9606.ENSP00000296849	9606.ENSP00000222462	0	FALSE	interacts with	NKD2 (interacts with) WNT16
0.408	952	0	0.42	0	15.5556	0.06	0	0	interacts with	NKD2 (interacts with) SFRP1	0	9606.ENSP00000296849	9606.ENSP00000220772	0	FALSE	interacts with	NKD2 (interacts with) SFRP1
0.16	954	0.057	0.602	0.5	15	0.08	0	0.811	interacts with	WNT8B (interacts with) WNT9B	0	9606.ENSP00000340677	9606.ENSP00000290015	0.077	FALSE	interacts with	WNT8B (interacts with) WNT9B
0.163	956	0.072	0.595	0.5	15	0.08	0	0.819	interacts with	WNT8B (interacts with) WNT9A	0	9606.ENSP00000340677	9606.ENSP00000272164	0	FALSE	interacts with	WNT8B (interacts with) WNT9A
0.304	958	0.062	0.651	0.5	12	0	0	0.964	interacts with	WNT8A (interacts with) WNT8B	0	9606.ENSP00000426653	9606.ENSP00000340677	0.057	FALSE	interacts with	WNT8A (interacts with) WNT8B
0.162	960	0.096	0.617	0.5	14	0.08	0	0.815	interacts with	WNT8A (interacts with) WNT9B	0	9606.ENSP00000426653	9606.ENSP00000290015	0.072	FALSE	interacts with	WNT8A (interacts with) WNT9B
0.187	962	0.069	0.619	0.5	14	0.08	0	0.783	interacts with	WNT8A (interacts with) WNT9A	0	9606.ENSP00000426653	9606.ENSP00000272164	0.075	FALSE	interacts with	WNT8A (interacts with) WNT9A
0.909	964	0.056	0.974	0.65	11	0.234	0	0	interacts with	SFRP5 (interacts with) WNT11	0	9606.ENSP00000266066	9606.ENSP00000325526	0	FALSE	interacts with	SFRP5 (interacts with) WNT11
0.849	966	0.061	0.956	0.65	11	0.234	0	0	interacts with	SFRP5 (interacts with) WNT8B	0	9606.ENSP00000266066	9606.ENSP00000340677	0	FALSE	interacts with	SFRP5 (interacts with) WNT8B
0.654	968	0	0.899	0.65	11	0.234	0	0	interacts with	SFRP5 (interacts with) WNT5B	0	9606.ENSP00000266066	9606.ENSP00000380379	0	FALSE	interacts with	SFRP5 (interacts with) WNT5B
0.676	970	0	0.898	0.65	11	0.173	0	0	interacts with	SFRP5 (interacts with) WNT10B	0	9606.ENSP00000266066	9606.ENSP00000301061	0	FALSE	interacts with	SFRP5 (interacts with) WNT10B
0.43	974	0.042	0.834	0.65	11	0.234	0	0	interacts with	SFRP5 (interacts with) WNT7B	0	9606.ENSP00000266066	9606.ENSP00000341032	0	FALSE	interacts with	SFRP5 (interacts with) WNT7B
0.385	976	0	0.82	0.65	11	0.234	0	0	interacts with	SFRP5 (interacts with) WNT7A	0	9606.ENSP00000266066	9606.ENSP00000285018	0	FALSE	interacts with	SFRP5 (interacts with) WNT7A
0.325	978	0	0.803	0.65	11	0.234	0	0	interacts with	SFRP5 (interacts with) WNT8A	0	9606.ENSP00000266066	9606.ENSP00000426653	0	FALSE	interacts with	SFRP5 (interacts with) WNT8A
0.344	980	0.047	0.795	0.65	11	0.173	0	0	interacts with	SFRP5 (interacts with) WNT9A	0	9606.ENSP00000266066	9606.ENSP00000272164	0	FALSE	interacts with	SFRP5 (interacts with) WNT9A
0.306	982	0	0.781	0.65	11	0.173	0	0	interacts with	SFRP5 (interacts with) WNT9B	0	9606.ENSP00000266066	9606.ENSP00000290015	0	FALSE	interacts with	SFRP5 (interacts with) WNT9B
0.703	984	0.071	0.721	0	11	0.067	0	0	interacts with	SFRP5 (interacts with) WIF1	0	9606.ENSP00000266066	9606.ENSP00000286574	0	FALSE	interacts with	SFRP5 (interacts with) WIF1
0.286	986	0.048	0.388	0	11	0.172	0	0	interacts with	SFRP5 (interacts with) VANGL2	0	9606.ENSP00000266066	9606.ENSP00000357040	0	FALSE	interacts with	SFRP5 (interacts with) VANGL2
0.274	988	0	0.274	0	12.5556	0	0	0	interacts with	SFRP5 (interacts with) WLS	0	9606.ENSP00000266066	9606.ENSP00000346829	0	FALSE	interacts with	SFRP5 (interacts with) WLS
0.608	990	0	0.885	0.65	11	0.234	0	0	interacts with	SFRP5 (interacts with) WNT2	0	9606.ENSP00000266066	9606.ENSP00000265441	0	FALSE	interacts with	SFRP5 (interacts with) WNT2
0.37	992	0.044	0.802	0.65	11	0.173	0	0	interacts with	SFRP5 (interacts with) WNT10A	0	9606.ENSP00000266066	9606.ENSP00000258411	0	FALSE	interacts with	SFRP5 (interacts with) WNT10A
0.403	994	0	0.826	0.65	11	0.234	0	0	interacts with	SFRP5 (interacts with) WNT6	0	9606.ENSP00000266066	9606.ENSP00000233948	0	FALSE	interacts with	SFRP5 (interacts with) WNT6
0.429	996	0	0.833	0.65	11	0.234	0	0	interacts with	SFRP5 (interacts with) WNT3	0	9606.ENSP00000266066	9606.ENSP00000225512	0	FALSE	interacts with	SFRP5 (interacts with) WNT3
0.35	998	0	0.81	0.65	11	0.234	0	0	interacts with	SFRP5 (interacts with) WNT16	0	9606.ENSP00000266066	9606.ENSP00000222462	0	FALSE	interacts with	SFRP5 (interacts with) WNT16
0.464	1000	0	0.961	0.9	10	0.334	0	0	interacts with	PORCN (interacts with) WNT5B	0	9606.ENSP00000322304	9606.ENSP00000380379	0	FALSE	interacts with	PORCN (interacts with) WNT5B
0.435	1004	0.042	0.959	0.9	10	0.334	0	0	interacts with	PORCN (interacts with) WNT7B	0	9606.ENSP00000322304	9606.ENSP00000341032	0	FALSE	interacts with	PORCN (interacts with) WNT7B
0.411	1006	0	0.957	0.9	10	0.334	0	0	interacts with	PORCN (interacts with) WNT11	0	9606.ENSP00000322304	9606.ENSP00000325526	0	FALSE	interacts with	PORCN (interacts with) WNT11
0.357	1008	0	0.953	0.9	10	0.334	0	0	interacts with	PORCN (interacts with) WNT8A	0	9606.ENSP00000322304	9606.ENSP00000426653	0	FALSE	interacts with	PORCN (interacts with) WNT8A
0.288	1010	0	0.948	0.9	10	0.334	0	0	interacts with	PORCN (interacts with) WNT8B	0	9606.ENSP00000322304	9606.ENSP00000340677	0	FALSE	interacts with	PORCN (interacts with) WNT8B
0.709	1012	0	0.785	0	11.5556	0.292	0	0	interacts with	PORCN (interacts with) WLS	0	9606.ENSP00000322304	9606.ENSP00000346829	0	FALSE	interacts with	PORCN (interacts with) WLS
0.414	1014	0	0.414	0	10	0	0	0	interacts with	PORCN (interacts with) RYK	0	9606.ENSP00000322304	9606.ENSP00000478721	0	FALSE	interacts with	PORCN (interacts with) RYK
0.297	1016	0	0.297	0	10	0	0	0	interacts with	PORCN (interacts with) SFRP4	0	9606.ENSP00000322304	9606.ENSP00000410715	0	FALSE	interacts with	PORCN (interacts with) SFRP4
0.286	1018	0	0.286	0	94	0	0	0	interacts with	PORCN (interacts with) ROR2	0	9606.ENSP00000322304	9606.ENSP00000364860	0	FALSE	interacts with	PORCN (interacts with) ROR2
0.26	1020	0	0.26	0	10	0	0	0	interacts with	PORCN (interacts with) VANGL2	0	9606.ENSP00000322304	9606.ENSP00000357040	0	FALSE	interacts with	PORCN (interacts with) VANGL2
0.398	1022	0.049	0.954	0.9	10	0.306	0	0	interacts with	PORCN (interacts with) WNT10B	0	9606.ENSP00000322304	9606.ENSP00000301061	0	FALSE	interacts with	PORCN (interacts with) WNT10B
0.321	1024	0	0.948	0.9	10	0.306	0	0	interacts with	PORCN (interacts with) WNT9B	0	9606.ENSP00000322304	9606.ENSP00000290015	0	FALSE	interacts with	PORCN (interacts with) WNT9B
0.303	1026	0	0.303	0	10	0	0	0	interacts with	PORCN (interacts with) WIF1	0	9606.ENSP00000322304	9606.ENSP00000286574	0	FALSE	interacts with	PORCN (interacts with) WIF1
0.759	1028	0.047	0.982	0.9	10	0.334	0	0	interacts with	PORCN (interacts with) WNT7A	0	9606.ENSP00000322304	9606.ENSP00000285018	0	FALSE	interacts with	PORCN (interacts with) WNT7A
0.369	1030	0	0.369	0	16.5	0	0	0	interacts with	PORCN (interacts with) SFRP2	0	9606.ENSP00000322304	9606.ENSP00000274063	0	FALSE	interacts with	PORCN (interacts with) SFRP2
0.386	1032	0	0.953	0.9	10	0.306	0	0	interacts with	PORCN (interacts with) WNT9A	0	9606.ENSP00000322304	9606.ENSP00000272164	0	FALSE	interacts with	PORCN (interacts with) WNT9A
0.279	1034	0	0.279	0	16.5	0	0	0	interacts with	PORCN (interacts with) SFRP5	0	9606.ENSP00000322304	9606.ENSP00000266066	0	FALSE	interacts with	PORCN (interacts with) SFRP5
0.53	1036	0	0.965	0.9	10	0.334	0	0	interacts with	PORCN (interacts with) WNT2	0	9606.ENSP00000322304	9606.ENSP00000265441	0	FALSE	interacts with	PORCN (interacts with) WNT2
0.455	1038	0	0.958	0.9	10	0.306	0	0	interacts with	PORCN (interacts with) WNT10A	0	9606.ENSP00000322304	9606.ENSP00000258411	0	FALSE	interacts with	PORCN (interacts with) WNT10A
0.41	1040	0	0.957	0.9	10	0.334	0	0	interacts with	PORCN (interacts with) WNT6	0	9606.ENSP00000322304	9606.ENSP00000233948	0	FALSE	interacts with	PORCN (interacts with) WNT6
0.69	1042	0	0.983	0.9	10	0.502	0	0	interacts with	PORCN (interacts with) WNT3	0	9606.ENSP00000322304	9606.ENSP00000225512	0	FALSE	interacts with	PORCN (interacts with) WNT3
0.358	1044	0	0.953	0.9	10	0.334	0	0	interacts with	PORCN (interacts with) WNT16	0	9606.ENSP00000322304	9606.ENSP00000222462	0	FALSE	interacts with	PORCN (interacts with) WNT16
0.41	1046	0	0.41	0	10	0	0	0	interacts with	PORCN (interacts with) SFRP1	0	9606.ENSP00000322304	9606.ENSP00000220772	0	FALSE	interacts with	PORCN (interacts with) SFRP1
0.348	1048	0	0.991	0.5	9	0.975	0	0	interacts with	WLS (interacts with) WNT8A	0	9606.ENSP00000346829	9606.ENSP00000426653	0	FALSE	interacts with	WLS (interacts with) WNT8A
0.43	1050	0.117	0.853	0.5	9	0.484	0	0	interacts with	WLS (interacts with) WNT5B	0	9606.ENSP00000346829	9606.ENSP00000380379	0	FALSE	interacts with	WLS (interacts with) WNT5B
0.5	1054	0.042	0.86	0.5	9	0.484	0	0	interacts with	WLS (interacts with) WNT7B	0	9606.ENSP00000346829	9606.ENSP00000341032	0	FALSE	interacts with	WLS (interacts with) WNT7B
0.328	1056	0	0.811	0.5	9	0.484	0	0	interacts with	WLS (interacts with) WNT8B	0	9606.ENSP00000346829	9606.ENSP00000340677	0	FALSE	interacts with	WLS (interacts with) WNT8B
0.554	1058	0	0.83	0.5	9	0.302	0	0	interacts with	WLS (interacts with) WNT11	0	9606.ENSP00000346829	9606.ENSP00000325526	0	FALSE	interacts with	WLS (interacts with) WNT11
0.464	1060	0	0.793	0.5	9	0.292	0	0	interacts with	WLS (interacts with) WNT10B	0	9606.ENSP00000346829	9606.ENSP00000301061	0	FALSE	interacts with	WLS (interacts with) WNT10B
0.492	1062	0	0.855	0.5	9	0.477	0	0	interacts with	WLS (interacts with) WNT9B	0	9606.ENSP00000346829	9606.ENSP00000290015	0	FALSE	interacts with	WLS (interacts with) WNT9B
0.454	1064	0	0.897	0.5	9	0.654	0	0	interacts with	WLS (interacts with) WNT7A	0	9606.ENSP00000346829	9606.ENSP00000285018	0	FALSE	interacts with	WLS (interacts with) WNT7A
0.47	1066	0	0.849	0.5	9	0.477	0	0	interacts with	WLS (interacts with) WNT9A	0	9606.ENSP00000346829	9606.ENSP00000272164	0	FALSE	interacts with	WLS (interacts with) WNT9A
0.433	1068	0	0.814	0.5	9	0.396	0	0	interacts with	WLS (interacts with) WNT2	0	9606.ENSP00000346829	9606.ENSP00000265441	0	FALSE	interacts with	WLS (interacts with) WNT2
0.516	1070	0	0.814	0.5	9	0.292	0	0	interacts with	WLS (interacts with) WNT10A	0	9606.ENSP00000346829	9606.ENSP00000258411	0	FALSE	interacts with	WLS (interacts with) WNT10A
0.472	1072	0	0.799	0.5	9	0.302	0	0	interacts with	WLS (interacts with) WNT6	0	9606.ENSP00000346829	9606.ENSP00000233948	0	FALSE	interacts with	WLS (interacts with) WNT6
0.558	1074	0	0.873	0.5	9	0.474	0	0	interacts with	WLS (interacts with) WNT3	0	9606.ENSP00000346829	9606.ENSP00000225512	0	FALSE	interacts with	WLS (interacts with) WNT3
0.474	1076	0	0.881	0.5	9	0.585	0	0	interacts with	WLS (interacts with) WNT16	0	9606.ENSP00000346829	9606.ENSP00000222462	0	FALSE	interacts with	WLS (interacts with) WNT16
0.291	1078	0.047	0.932	0.9	8	0.113	0	0	interacts with	NOTUM (interacts with) WNT8A	0	9606.ENSP00000387310	9606.ENSP00000426653	0	FALSE	interacts with	NOTUM (interacts with) WNT8A
0.314	1080	0	0.314	0	12.5	0	0	0	interacts with	NOTUM (interacts with) SFRP4	0	9606.ENSP00000387310	9606.ENSP00000410715	0	FALSE	interacts with	NOTUM (interacts with) SFRP4
0.249	1082	0	0.248	0	9.78571	0	0	0	interacts with	NOTUM (interacts with) RYK	0	9606.ENSP00000387310	9606.ENSP00000478721	0	FALSE	interacts with	NOTUM (interacts with) RYK
0.261	1084	0	0.928	0.9	8	0.113	0	0	interacts with	NOTUM (interacts with) WNT5B	0	9606.ENSP00000387310	9606.ENSP00000380379	0	FALSE	interacts with	NOTUM (interacts with) WNT5B
0.206	1088	0	0.206	0	9.47059	0	0	0	interacts with	NOTUM (interacts with) VANGL2	0	9606.ENSP00000387310	9606.ENSP00000357040	0	FALSE	interacts with	NOTUM (interacts with) VANGL2
0.482	1090	0	0.482	0	10.9444	0	0	0	interacts with	NOTUM (interacts with) WLS	0	9606.ENSP00000387310	9606.ENSP00000346829	0	FALSE	interacts with	NOTUM (interacts with) WLS
0.332	1092	0.042	0.935	0.9	8	0.113	0	0	interacts with	NOTUM (interacts with) WNT7B	0	9606.ENSP00000387310	9606.ENSP00000341032	0	FALSE	interacts with	NOTUM (interacts with) WNT7B
0.248	1094	0	0.927	0.9	8	0.113	0	0	interacts with	NOTUM (interacts with) WNT8B	0	9606.ENSP00000387310	9606.ENSP00000340677	0	FALSE	interacts with	NOTUM (interacts with) WNT8B
0.399	1096	0.083	0.944	0.9	8	0.113	0	0	interacts with	NOTUM (interacts with) WNT11	0	9606.ENSP00000387310	9606.ENSP00000325526	0	FALSE	interacts with	NOTUM (interacts with) WNT11
0.514	1098	0	0.514	0	26.7857	0	0	0	interacts with	NOTUM (interacts with) PORCN	0	9606.ENSP00000387310	9606.ENSP00000322304	0	FALSE	interacts with	NOTUM (interacts with) PORCN
0.317	1100	0	0.933	0.9	8	0.105	0	0	interacts with	NOTUM (interacts with) WNT10B	0	9606.ENSP00000387310	9606.ENSP00000301061	0	FALSE	interacts with	NOTUM (interacts with) WNT10B
0.297	1102	0	0.931	0.9	8	0.105	0	0	interacts with	NOTUM (interacts with) WNT9B	0	9606.ENSP00000387310	9606.ENSP00000290015	0	FALSE	interacts with	NOTUM (interacts with) WNT9B
0.529	1104	0.074	0.545	0	8	0	0	0	interacts with	NOTUM (interacts with) WIF1	0	9606.ENSP00000387310	9606.ENSP00000286574	0	FALSE	interacts with	NOTUM (interacts with) WIF1
0.324	1106	0	0.965	0.9	8	0.526	0	0	interacts with	NOTUM (interacts with) WNT7A	0	9606.ENSP00000387310	9606.ENSP00000285018	0	FALSE	interacts with	NOTUM (interacts with) WNT7A
0.339	1108	0	0.339	0	14.5	0	0	0	interacts with	NOTUM (interacts with) SFRP2	0	9606.ENSP00000387310	9606.ENSP00000274063	0	FALSE	interacts with	NOTUM (interacts with) SFRP2
0.247	1110	0.042	0.926	0.9	8	0.105	0	0	interacts with	NOTUM (interacts with) WNT9A	0	9606.ENSP00000387310	9606.ENSP00000272164	0	FALSE	interacts with	NOTUM (interacts with) WNT9A
0.404	1112	0.042	0.404	0	16.0625	0	0	0	interacts with	NOTUM (interacts with) SFRP5	0	9606.ENSP00000387310	9606.ENSP00000266066	0	FALSE	interacts with	NOTUM (interacts with) SFRP5
0.275	1114	0.048	0.93	0.9	8	0.113	0	0	interacts with	NOTUM (interacts with) WNT2	0	9606.ENSP00000387310	9606.ENSP00000265441	0	FALSE	interacts with	NOTUM (interacts with) WNT2
0.288	1116	0	0.93	0.9	8	0.105	0	0	interacts with	NOTUM (interacts with) WNT10A	0	9606.ENSP00000387310	9606.ENSP00000258411	0	FALSE	interacts with	NOTUM (interacts with) WNT10A
0.378	1118	0.074	0.942	0.9	8	0.113	0	0	interacts with	NOTUM (interacts with) WNT6	0	9606.ENSP00000387310	9606.ENSP00000233948	0	FALSE	interacts with	NOTUM (interacts with) WNT6
0.386	1120	0.042	0.94	0.9	8	0.113	0	0	interacts with	NOTUM (interacts with) WNT3	0	9606.ENSP00000387310	9606.ENSP00000225512	0	FALSE	interacts with	NOTUM (interacts with) WNT3
0.399	1122	0	0.942	0.9	8	0.113	0	0	interacts with	NOTUM (interacts with) WNT16	0	9606.ENSP00000387310	9606.ENSP00000222462	0	FALSE	interacts with	NOTUM (interacts with) WNT16
0.486	1124	0	0.486	0	8	0	0	0	interacts with	NOTUM (interacts with) SFRP1	0	9606.ENSP00000387310	9606.ENSP00000220772	0	FALSE	interacts with	NOTUM (interacts with) SFRP1
0.454	1126	0.055	0.731	0.5	9	0.08	0	0.841	interacts with	WNT6 (interacts with) WNT9A	0	9606.ENSP00000233948	9606.ENSP00000272164	0	FALSE	interacts with	WNT6 (interacts with) WNT9A
0.329	1128	0	0.65	0.5	7	0	0	0.83	interacts with	WNT6 (interacts with) WNT8A	0	9606.ENSP00000233948	9606.ENSP00000426653	0	FALSE	interacts with	WNT6 (interacts with) WNT8A
0.155	1130	0.06	0.586	0.5	9	0.08	0	0.844	interacts with	WNT6 (interacts with) WNT9B	0	9606.ENSP00000233948	9606.ENSP00000290015	0	FALSE	interacts with	WNT6 (interacts with) WNT9B
0.16	1132	0.05	0.566	0.5	7	0	0	0.828	interacts with	WNT6 (interacts with) WNT8B	0	9606.ENSP00000233948	9606.ENSP00000340677	0	FALSE	interacts with	WNT6 (interacts with) WNT8B
0.127	1134	0.042	0.553	0.5	7	0	0	0.9	interacts with	WNT6 (interacts with) WNT7B	0	9606.ENSP00000233948	9606.ENSP00000341032	0.058	FALSE	interacts with	WNT6 (interacts with) WNT7B
0.135	1136	0.042	0.549	0.5	7	0	0	0.894	interacts with	WNT6 (interacts with) WNT7A	0	9606.ENSP00000233948	9606.ENSP00000285018	0	FALSE	interacts with	WNT6 (interacts with) WNT7A
0.954	1138	0	0.986	0.65	6	0.234	0	0	interacts with	FZD10 (interacts with) WNT7A	0	9606.ENSP00000229030	9606.ENSP00000285018	0	FALSE	interacts with	FZD10 (interacts with) WNT7A
0.879	1140	0	0.964	0.65	6	0.234	0	0	interacts with	FZD10 (interacts with) WNT7B	0	9606.ENSP00000229030	9606.ENSP00000341032	0	FALSE	interacts with	FZD10 (interacts with) WNT7B
0.546	1142	0.094	0.964	0.9	6	0.234	0	0	interacts with	FZD10 (interacts with) WNT11	0	9606.ENSP00000229030	9606.ENSP00000325526	0	FALSE	interacts with	FZD10 (interacts with) WNT11
0.448	1144	0	0.945	0.9	6	0.091	0	0	interacts with	FZD10 (interacts with) RYK	0	9606.ENSP00000229030	9606.ENSP00000478721	0	FALSE	interacts with	FZD10 (interacts with) RYK
0.679	1146	0	0.936	0.8	6	0.093	0	0	interacts with	FZD10 (interacts with) LRP5	0	9606.ENSP00000229030	9606.ENSP00000294304	0	FALSE	interacts with	FZD10 (interacts with) LRP5
0.644	1148	0.042	0.93	0.8	6	0.093	0	0	interacts with	FZD10 (interacts with) LRP6	0	9606.ENSP00000229030	9606.ENSP00000261349	0	FALSE	interacts with	FZD10 (interacts with) LRP6
0.658	1152	0.063	0.902	0.65	6	0.234	0	0	interacts with	FZD10 (interacts with) WNT2	0	9606.ENSP00000229030	9606.ENSP00000265441	0	FALSE	interacts with	FZD10 (interacts with) WNT2
0.629	1154	0	0.883	0.65	6	0.173	0	0	interacts with	FZD10 (interacts with) WNT9B	0	9606.ENSP00000229030	9606.ENSP00000290015	0	FALSE	interacts with	FZD10 (interacts with) WNT9B
0.628	1156	0	0.883	0.65	6	0.173	0	0	interacts with	FZD10 (interacts with) WNT10A	0	9606.ENSP00000229030	9606.ENSP00000258411	0	FALSE	interacts with	FZD10 (interacts with) WNT10A
0.623	1158	0	0.881	0.65	6	0.173	0	0	interacts with	FZD10 (interacts with) WNT10B	0	9606.ENSP00000229030	9606.ENSP00000301061	0	FALSE	interacts with	FZD10 (interacts with) WNT10B
0.472	1160	0.078	0.852	0.65	6	0.234	0	0	interacts with	FZD10 (interacts with) WNT6	0	9606.ENSP00000229030	9606.ENSP00000233948	0	FALSE	interacts with	FZD10 (interacts with) WNT6
0.43	1162	0	0.834	0.65	6	0.234	0	0	interacts with	FZD10 (interacts with) WNT8A	0	9606.ENSP00000229030	9606.ENSP00000426653	0	FALSE	interacts with	FZD10 (interacts with) WNT8A
0.43	1164	0	0.834	0.65	6	0.234	0	0	interacts with	FZD10 (interacts with) WNT8B	0	9606.ENSP00000229030	9606.ENSP00000340677	0	FALSE	interacts with	FZD10 (interacts with) WNT8B
0.402	1166	0	0.825	0.65	6	0.234	0	0	interacts with	FZD10 (interacts with) WNT5B	0	9606.ENSP00000229030	9606.ENSP00000380379	0	FALSE	interacts with	FZD10 (interacts with) WNT5B
0.418	1168	0	0.817	0.65	6	0.173	0	0	interacts with	FZD10 (interacts with) WNT9A	0	9606.ENSP00000229030	9606.ENSP00000272164	0	FALSE	interacts with	FZD10 (interacts with) WNT9A
0.253	1170	0.075	0.757	0.65	6	0.113	0	0	interacts with	FZD10 (interacts with) ROR2	0	9606.ENSP00000229030	9606.ENSP00000364860	0	FALSE	interacts with	FZD10 (interacts with) ROR2
0.159	1172	0	0.693	0.65	6	0	0	0.678	interacts with	FZD10 (interacts with) SFRP5	0	9606.ENSP00000229030	9606.ENSP00000266066	0	FALSE	interacts with	FZD10 (interacts with) SFRP5
0.139	1174	0.066	0.693	0.65	6	0	0	0.691	interacts with	FZD10 (interacts with) SFRP2	0	9606.ENSP00000229030	9606.ENSP00000274063	0	FALSE	interacts with	FZD10 (interacts with) SFRP2
0.151	1176	0.042	0.69	0.65	6	0	0	0.68	interacts with	FZD10 (interacts with) SFRP4	0	9606.ENSP00000229030	9606.ENSP00000410715	0	FALSE	interacts with	FZD10 (interacts with) SFRP4
0.494	1178	0.076	0.526	0	6	0.067	0	0	interacts with	FZD10 (interacts with) WIF1	0	9606.ENSP00000229030	9606.ENSP00000286574	0	FALSE	interacts with	FZD10 (interacts with) WIF1
0.49	1180	0.074	0.518	0	6	0.06	0	0	interacts with	FZD10 (interacts with) NKD1	0	9606.ENSP00000229030	9606.ENSP00000268459	0	FALSE	interacts with	FZD10 (interacts with) NKD1
0.305	1182	0.081	0.425	0	6	0.172	0	0	interacts with	FZD10 (interacts with) VANGL2	0	9606.ENSP00000229030	9606.ENSP00000357040	0	FALSE	interacts with	FZD10 (interacts with) VANGL2
0.369	1184	0.042	0.37	0	6	0	0	0	interacts with	FZD10 (interacts with) PORCN	0	9606.ENSP00000229030	9606.ENSP00000322304	0	FALSE	interacts with	FZD10 (interacts with) PORCN
0.306	1186	0.063	0.322	0	6	0	0	0	interacts with	FZD10 (interacts with) NOTUM	0	9606.ENSP00000229030	9606.ENSP00000387310	0	FALSE	interacts with	FZD10 (interacts with) NOTUM
0.257	1188	0.043	0.259	0	6	0	0	0	interacts with	FZD10 (interacts with) WLS	0	9606.ENSP00000229030	9606.ENSP00000346829	0	FALSE	interacts with	FZD10 (interacts with) WLS
0.235	1190	0.049	0.256	0	6	0.06	0	0	interacts with	FZD10 (interacts with) NKD2	0	9606.ENSP00000229030	9606.ENSP00000296849	0	FALSE	interacts with	FZD10 (interacts with) NKD2
0.146	1192	0	0.208	0	7.375	0.11	0	0	interacts with	FZD10 (interacts with) MUSK	0	9606.ENSP00000229030	9606.ENSP00000363571	0	FALSE	interacts with	FZD10 (interacts with) MUSK
0.104	1194	0.073	0.155	0	20.7083	0.065	0	0	interacts with	FZD10 (interacts with) GPC3	0	9606.ENSP00000229030	9606.ENSP00000377836	0	FALSE	interacts with	FZD10 (interacts with) GPC3
0.475	1196	0	0.847	0.65	6	0.234	0	0	interacts with	FZD10 (interacts with) WNT3	0	9606.ENSP00000229030	9606.ENSP00000225512	0	FALSE	interacts with	FZD10 (interacts with) WNT3
0.474	1198	0.044	0.847	0.65	6	0.234	0	0	interacts with	FZD10 (interacts with) WNT16	0	9606.ENSP00000229030	9606.ENSP00000222462	0	FALSE	interacts with	FZD10 (interacts with) WNT16
0.203	1200	0.064	0.716	0.65	6	0	0	0.666	interacts with	FZD10 (interacts with) SFRP1	0	9606.ENSP00000229030	9606.ENSP00000220772	0	FALSE	interacts with	FZD10 (interacts with) SFRP1
0.425	1202	0.042	0.738	0.5	5	0.164	0	0.914	interacts with	WNT16 (interacts with) WNT7A	0	9606.ENSP00000222462	9606.ENSP00000285018	0	FALSE	interacts with	WNT16 (interacts with) WNT7A
0.459	1204	0.054	0.721	0.5	5	0	0	0.891	interacts with	WNT16 (interacts with) WNT2	0	9606.ENSP00000222462	9606.ENSP00000265441	0	FALSE	interacts with	WNT16 (interacts with) WNT2
0.436	1206	0.049	0.708	0.5	5	0	0	0.9	interacts with	WNT16 (interacts with) WNT5B	0	9606.ENSP00000222462	9606.ENSP00000380379	0	FALSE	interacts with	WNT16 (interacts with) WNT5B
0.431	1208	0.044	0.704	0.5	5	0	0	0.826	interacts with	WNT16 (interacts with) WNT8A	0	9606.ENSP00000222462	9606.ENSP00000426653	0	FALSE	interacts with	WNT16 (interacts with) WNT8A
0.415	1210	0	0.694	0.5	5	0	0	0.92	interacts with	WNT16 (interacts with) WNT7B	0	9606.ENSP00000222462	9606.ENSP00000341032	0	FALSE	interacts with	WNT16 (interacts with) WNT7B
0.321	1212	0.069	0.656	0.5	5	0	0	0.894	interacts with	WNT16 (interacts with) WNT3	0	9606.ENSP00000222462	9606.ENSP00000225512	0	FALSE	interacts with	WNT16 (interacts with) WNT3
0.187	1214	0.055	0.599	0.5	5	0.08	0	0.834	interacts with	WNT16 (interacts with) WNT9A	0	9606.ENSP00000222462	9606.ENSP00000272164	0	FALSE	interacts with	WNT16 (interacts with) WNT9A
0.136	1216	0.055	0.574	0.5	5	0.08	0	0.869	interacts with	WNT16 (interacts with) WNT9B	0	9606.ENSP00000222462	9606.ENSP00000290015	0	FALSE	interacts with	WNT16 (interacts with) WNT9B
0.149	1218	0	0.556	0.5	5	0	0	0.838	interacts with	WNT16 (interacts with) WNT8B	0	9606.ENSP00000222462	9606.ENSP00000340677	0	FALSE	interacts with	WNT16 (interacts with) WNT8B
0.145	1220	0	0.554	0.5	5	0	0	0.864	interacts with	WNT16 (interacts with) WNT6	0	9606.ENSP00000222462	9606.ENSP00000233948	0	FALSE	interacts with	WNT16 (interacts with) WNT6
0.994	1224	0	0.999	0.9	4.25	0.133	0	0	interacts with	DKK4 (interacts with) LRP6	0	9606.ENSP00000220812	9606.ENSP00000261349	0	FALSE	interacts with	DKK4 (interacts with) LRP6
0.996	1226	0	0.999	0.9	4.25	0.393	0	0	interacts with	DKK4 (interacts with) LRP5	0	9606.ENSP00000220812	9606.ENSP00000294304	0	FALSE	interacts with	DKK4 (interacts with) LRP5
0.86	1228	0	0.949	0.65	4	0.045	0	0	interacts with	DKK4 (interacts with) WNT6	0	9606.ENSP00000220812	9606.ENSP00000233948	0	FALSE	interacts with	DKK4 (interacts with) WNT6
0.648	1232	0	0.872	0.65	4	0.045	0	0	interacts with	DKK4 (interacts with) WNT2	0	9606.ENSP00000220812	9606.ENSP00000265441	0	FALSE	interacts with	DKK4 (interacts with) WNT2
0.545	1234	0	0.834	0.65	4	0.045	0	0	interacts with	DKK4 (interacts with) WNT10B	0	9606.ENSP00000220812	9606.ENSP00000301061	0	FALSE	interacts with	DKK4 (interacts with) WNT10B
0.822	1236	0	0.822	0	4.75	0	0	0	interacts with	DKK4 (interacts with) FRZB	0	9606.ENSP00000220812	9606.ENSP00000295113	0	FALSE	interacts with	DKK4 (interacts with) FRZB
0.475	1238	0.062	0.813	0.65	4	0.045	0	0	interacts with	DKK4 (interacts with) WNT11	0	9606.ENSP00000220812	9606.ENSP00000325526	0	FALSE	interacts with	DKK4 (interacts with) WNT11
0.447	1240	0.042	0.799	0.65	4	0.045	0	0	interacts with	DKK4 (interacts with) WNT10A	0	9606.ENSP00000220812	9606.ENSP00000258411	0	FALSE	interacts with	DKK4 (interacts with) WNT10A
0.444	1242	0.042	0.798	0.65	4	0.045	0	0	interacts with	DKK4 (interacts with) WNT3	0	9606.ENSP00000220812	9606.ENSP00000225512	0	FALSE	interacts with	DKK4 (interacts with) WNT3
0.445	1244	0.044	0.798	0.65	4	0.045	0	0	interacts with	DKK4 (interacts with) WNT7A	0	9606.ENSP00000220812	9606.ENSP00000285018	0	FALSE	interacts with	DKK4 (interacts with) WNT7A
0.786	1246	0.059	0.79	0	4	0	0	0	interacts with	DKK4 (interacts with) WIF1	0	9606.ENSP00000220812	9606.ENSP00000286574	0	FALSE	interacts with	DKK4 (interacts with) WIF1
0.787	1248	0	0.787	0	4.75	0	0	0	interacts with	DKK4 (interacts with) FZD8	0	9606.ENSP00000220812	9606.ENSP00000363826	0	FALSE	interacts with	DKK4 (interacts with) FZD8
0.416	1250	0	0.787	0.65	4	0.045	0	0	interacts with	DKK4 (interacts with) WNT7B	0	9606.ENSP00000220812	9606.ENSP00000341032	0	FALSE	interacts with	DKK4 (interacts with) WNT7B
0.396	1252	0.044	0.781	0.65	4	0.045	0	0	interacts with	DKK4 (interacts with) WNT16	0	9606.ENSP00000220812	9606.ENSP00000222462	0	FALSE	interacts with	DKK4 (interacts with) WNT16
0.391	1254	0	0.778	0.65	4	0.045	0	0	interacts with	DKK4 (interacts with) WNT5B	0	9606.ENSP00000220812	9606.ENSP00000380379	0	FALSE	interacts with	DKK4 (interacts with) WNT5B
0.376	1256	0.042	0.773	0.65	4	0.045	0	0	interacts with	DKK4 (interacts with) WNT9A	0	9606.ENSP00000220812	9606.ENSP00000272164	0	FALSE	interacts with	DKK4 (interacts with) WNT9A
0.31	1258	0.055	0.752	0.65	4	0.045	0	0	interacts with	DKK4 (interacts with) WNT8B	0	9606.ENSP00000220812	9606.ENSP00000340677	0	FALSE	interacts with	DKK4 (interacts with) WNT8B
0.31	1260	0	0.749	0.65	4	0.045	0	0	interacts with	DKK4 (interacts with) WNT9B	0	9606.ENSP00000220812	9606.ENSP00000290015	0	FALSE	interacts with	DKK4 (interacts with) WNT9B
0.3	1262	0.047	0.747	0.65	4	0.045	0	0	interacts with	DKK4 (interacts with) WNT8A	0	9606.ENSP00000220812	9606.ENSP00000426653	0	FALSE	interacts with	DKK4 (interacts with) WNT8A
0.497	1264	0	0.685	0.4	11	0	0	0	interacts with	DKK4 (interacts with) FZD1	0	9606.ENSP00000220812	9606.ENSP00000287934	0	FALSE	interacts with	DKK4 (interacts with) FZD1
0.44	1266	0	0.65	0.4	4.75	0	0	0	interacts with	DKK4 (interacts with) FZD2	0	9606.ENSP00000220812	9606.ENSP00000323901	0	FALSE	interacts with	DKK4 (interacts with) FZD2
0.548	1268	0	0.548	0	4	0	0	0	interacts with	DKK4 (interacts with) SFRP2	0	9606.ENSP00000220812	9606.ENSP00000274063	0	FALSE	interacts with	DKK4 (interacts with) SFRP2
0.542	1270	0	0.546	0	12.5833	0.051	0	0	interacts with	DKK4 (interacts with) DVL1	0	9606.ENSP00000220812	9606.ENSP00000368166	0	FALSE	interacts with	DKK4 (interacts with) DVL1
0.497	1272	0.042	0.497	0	4	0	0	0	interacts with	DKK4 (interacts with) SFRP4	0	9606.ENSP00000220812	9606.ENSP00000410715	0	FALSE	interacts with	DKK4 (interacts with) SFRP4
0.496	1274	0.042	0.496	0	5.5625	0	0	0	interacts with	DKK4 (interacts with) SFRP5	0	9606.ENSP00000220812	9606.ENSP00000266066	0	FALSE	interacts with	DKK4 (interacts with) SFRP5
0.397	1276	0.18	0.485	0	4	0	0	0	interacts with	DKK4 (interacts with) NOTUM	0	9606.ENSP00000220812	9606.ENSP00000387310	0	FALSE	interacts with	DKK4 (interacts with) NOTUM
0.37	1278	0.212	0.482	0	4	0	0	0	interacts with	DKK4 (interacts with) NKD1	0	9606.ENSP00000220812	9606.ENSP00000268459	0	FALSE	interacts with	DKK4 (interacts with) NKD1
0.476	1280	0	0.476	0	5.78571	0	0	0	interacts with	DKK4 (interacts with) RYK	0	9606.ENSP00000220812	9606.ENSP00000478721	0	FALSE	interacts with	DKK4 (interacts with) RYK
0.441	1282	0	0.441	0	4.75	0	0	0	interacts with	DKK4 (interacts with) FZD4	0	9606.ENSP00000220812	9606.ENSP00000434034	0	FALSE	interacts with	DKK4 (interacts with) FZD4
0.405	1284	0.064	0.419	0	11	0	0	0	interacts with	DKK4 (interacts with) FZD10	0	9606.ENSP00000220812	9606.ENSP00000229030	0	FALSE	interacts with	DKK4 (interacts with) FZD10
0.417	1286	0	0.417	0	4.75	0	0	0	interacts with	DKK4 (interacts with) FZD7	0	9606.ENSP00000220812	9606.ENSP00000286201	0	FALSE	interacts with	DKK4 (interacts with) FZD7
0.347	1288	0	0.409	0	8.75	0.133	0	0	interacts with	DKK4 (interacts with) LRP5L	0	9606.ENSP00000220812	9606.ENSP00000482378	0	FALSE	interacts with	DKK4 (interacts with) LRP5L
0.404	1290	0	0.404	0	4.75	0	0	0	interacts with	DKK4 (interacts with) FZD5	0	9606.ENSP00000220812	9606.ENSP00000354607	0	FALSE	interacts with	DKK4 (interacts with) FZD5
0.383	1292	0.042	0.383	0	4.25	0	0	0	interacts with	DKK4 (interacts with) FZD9	0	9606.ENSP00000220812	9606.ENSP00000345785	0	FALSE	interacts with	DKK4 (interacts with) FZD9
0.374	1294	0	0.374	0	9.25	0	0	0	interacts with	DKK4 (interacts with) FZD3	0	9606.ENSP00000220812	9606.ENSP00000240093	0	FALSE	interacts with	DKK4 (interacts with) FZD3
0.342	1296	0	0.342	0	7.82143	0	0	0	interacts with	DKK4 (interacts with) FZD6	0	9606.ENSP00000220812	9606.ENSP00000351605	0	FALSE	interacts with	DKK4 (interacts with) FZD6
0.314	1298	0	0.314	0	5.78571	0	0	0	interacts with	DKK4 (interacts with) PORCN	0	9606.ENSP00000220812	9606.ENSP00000322304	0	FALSE	interacts with	DKK4 (interacts with) PORCN
0.29	1300	0	0.297	0	12.5833	0.051	0	0	interacts with	DKK4 (interacts with) DVL3	0	9606.ENSP00000220812	9606.ENSP00000316054	0	FALSE	interacts with	DKK4 (interacts with) DVL3
0.288	1302	0	0.288	0	5.38889	0	0	0	interacts with	DKK4 (interacts with) WLS	0	9606.ENSP00000220812	9606.ENSP00000346829	0	FALSE	interacts with	DKK4 (interacts with) WLS
0.203	1304	0.045	0.231	0	6.08333	0.071	0	0	interacts with	DKK4 (interacts with) ROR2	0	9606.ENSP00000220812	9606.ENSP00000364860	0	FALSE	interacts with	DKK4 (interacts with) ROR2
0.174	1306	0.056	0.187	0	5.92308	0	0	0	interacts with	DKK4 (interacts with) NKD2	0	9606.ENSP00000220812	9606.ENSP00000296849	0	FALSE	interacts with	DKK4 (interacts with) NKD2
0.155	1308	0	0.155	0	5.47059	0	0	0	interacts with	DKK4 (interacts with) VANGL2	0	9606.ENSP00000220812	9606.ENSP00000357040	0	FALSE	interacts with	DKK4 (interacts with) VANGL2
0.771	1310	0	0.771	0	4	0	0	0	interacts with	DKK4 (interacts with) SFRP1	0	9606.ENSP00000220812	9606.ENSP00000220772	0	FALSE	interacts with	DKK4 (interacts with) SFRP1
0.755	1404	0	0.975	0.9	3.78571	0.091	0	0	interacts with	FZD4 (interacts with) RYK	0	9606.ENSP00000434034	9606.ENSP00000478721	0	FALSE	interacts with	FZD4 (interacts with) RYK
0.334	1406	0	0.37	0	41.3333	0.093	0	0	interacts with	FZD4 (interacts with) LRP5L	0	9606.ENSP00000434034	9606.ENSP00000482378	0	FALSE	interacts with	FZD4 (interacts with) LRP5L
0.676	1408	0	0.923	0.65	3.30435	0.234	0	0	interacts with	FZD4 (interacts with) WNT8A	0	9606.ENSP00000434034	9606.ENSP00000426653	0.226	FALSE	interacts with	FZD4 (interacts with) WNT8A
0.178	1410	0.057	0.705	0.65	3.66667	0	0	0.671	interacts with	FZD4 (interacts with) SFRP4	0	9606.ENSP00000434034	9606.ENSP00000410715	0	FALSE	interacts with	FZD4 (interacts with) SFRP4
0.359	1412	0	0.359	0	4	0	0	0	interacts with	FZD4 (interacts with) NOTUM	0	9606.ENSP00000434034	9606.ENSP00000387310	0	FALSE	interacts with	FZD4 (interacts with) NOTUM
0.9	1414	0	0.97	0.65	3.42857	0.234	0	0	interacts with	FZD4 (interacts with) WNT5B	0	9606.ENSP00000434034	9606.ENSP00000380379	0	FALSE	interacts with	FZD4 (interacts with) WNT5B
0.213	1416	0.092	0.273	0	32.8155	0.065	0	0	interacts with	FZD4 (interacts with) GPC3	0	9606.ENSP00000434034	9606.ENSP00000377836	0	FALSE	interacts with	FZD4 (interacts with) GPC3
0.453	1418	0.063	0.819	0.65	4.08333	0.113	0	0	interacts with	FZD4 (interacts with) ROR2	0	9606.ENSP00000434034	9606.ENSP00000364860	0	FALSE	interacts with	FZD4 (interacts with) ROR2
0.134	1420	0.06	0.557	0.5	2	0	0	0.905	interacts with	FZD4 (interacts with) FZD8	0	9606.ENSP00000434034	9606.ENSP00000363826	0	FALSE	interacts with	FZD4 (interacts with) FZD8
0.204	1422	0	0.261	0	8.01786	0.11	0	0	interacts with	FZD4 (interacts with) MUSK	0	9606.ENSP00000434034	9606.ENSP00000363571	0	FALSE	interacts with	FZD4 (interacts with) MUSK
0.662	1426	0.048	0.71	0	3.47059	0.172	0	0	interacts with	FZD4 (interacts with) VANGL2	0	9606.ENSP00000434034	9606.ENSP00000357040	0	FALSE	interacts with	FZD4 (interacts with) VANGL2
0.136	1428	0.049	0.553	0.5	2	0	0	0.908	interacts with	FZD4 (interacts with) FZD5	0	9606.ENSP00000434034	9606.ENSP00000354607	0	FALSE	interacts with	FZD4 (interacts with) FZD5
0.176	1430	0.042	0.571	0.5	5.57143	0	0	0.839	interacts with	FZD4 (interacts with) FZD6	0	9606.ENSP00000434034	9606.ENSP00000351605	0	FALSE	interacts with	FZD4 (interacts with) FZD6
0.394	1432	0	0.394	0	4.96784	0	0	0	interacts with	FZD4 (interacts with) WLS	0	9606.ENSP00000434034	9606.ENSP00000346829	0	FALSE	interacts with	FZD4 (interacts with) WLS
0.365	1434	0.043	0.366	0	31.25	0	0	0.943	interacts with	FZD4 (interacts with) FZD9	0	9606.ENSP00000434034	9606.ENSP00000345785	0	FALSE	interacts with	FZD4 (interacts with) FZD9
0.958	1436	0	0.99	0.65	2	0.234	0	0	interacts with	FZD4 (interacts with) WNT7B	0	9606.ENSP00000434034	9606.ENSP00000341032	0.219	FALSE	interacts with	FZD4 (interacts with) WNT7B
0.475	1438	0	0.847	0.65	3.30435	0.234	0	0	interacts with	FZD4 (interacts with) WNT8B	0	9606.ENSP00000434034	9606.ENSP00000340677	0	FALSE	interacts with	FZD4 (interacts with) WNT8B
0.932	1440	0.058	0.995	0.9	3.57895	0.234	0	0	interacts with	FZD4 (interacts with) WNT11	0	9606.ENSP00000434034	9606.ENSP00000325526	0.208	FALSE	interacts with	FZD4 (interacts with) WNT11
0.369	1442	0	0.369	0	5.78571	0	0	0	interacts with	FZD4 (interacts with) PORCN	0	9606.ENSP00000434034	9606.ENSP00000322304	0	FALSE	interacts with	FZD4 (interacts with) PORCN
0.677	1444	0	0.898	0.65	3.57895	0.173	0	0	interacts with	FZD4 (interacts with) WNT10B	0	9606.ENSP00000434034	9606.ENSP00000301061	0	FALSE	interacts with	FZD4 (interacts with) WNT10B
0.286	1446	0	0.3	0	5.92308	0.06	0	0	interacts with	FZD4 (interacts with) NKD2	0	9606.ENSP00000434034	9606.ENSP00000296849	0	FALSE	interacts with	FZD4 (interacts with) NKD2
0.998	1448	0.06	0.999	0.8	2	0.093	0	0	interacts with	FZD4 (interacts with) LRP5	0	9606.ENSP00000434034	9606.ENSP00000294304	0	FALSE	interacts with	FZD4 (interacts with) LRP5
0.619	1450	0	0.907	0.65	2	0.173	0	0	interacts with	FZD4 (interacts with) WNT9B	0	9606.ENSP00000434034	9606.ENSP00000290015	0.261	FALSE	interacts with	FZD4 (interacts with) WNT9B
0.524	1452	0.046	0.539	0	3.57895	0.067	0	0	interacts with	FZD4 (interacts with) WIF1	0	9606.ENSP00000434034	9606.ENSP00000286574	0	FALSE	interacts with	FZD4 (interacts with) WIF1
0.126	1454	0.057	0.562	0.5	2	0	0	0.909	interacts with	FZD4 (interacts with) FZD7	0	9606.ENSP00000434034	9606.ENSP00000286201	0.063	FALSE	interacts with	FZD4 (interacts with) FZD7
0.972	1456	0	0.993	0.65	2	0.234	0	0	interacts with	FZD4 (interacts with) WNT7A	0	9606.ENSP00000434034	9606.ENSP00000285018	0.202	FALSE	interacts with	FZD4 (interacts with) WNT7A
0.163	1458	0.056	0.699	0.65	3.66667	0	0	0.7	interacts with	FZD4 (interacts with) SFRP2	0	9606.ENSP00000434034	9606.ENSP00000274063	0	FALSE	interacts with	FZD4 (interacts with) SFRP2
0.518	1460	0.049	0.875	0.65	2	0.173	0	0	interacts with	FZD4 (interacts with) WNT9A	0	9606.ENSP00000434034	9606.ENSP00000272164	0.203	FALSE	interacts with	FZD4 (interacts with) WNT9A
0.396	1462	0.043	0.409	0	2	0.06	0	0	interacts with	FZD4 (interacts with) NKD1	0	9606.ENSP00000434034	9606.ENSP00000268459	0	FALSE	interacts with	FZD4 (interacts with) NKD1
0.208	1464	0	0.711	0.65	5.32721	0	0	0.67	interacts with	FZD4 (interacts with) SFRP5	0	9606.ENSP00000434034	9606.ENSP00000266066	0	FALSE	interacts with	FZD4 (interacts with) SFRP5
0.818	1466	0.048	0.959	0.65	2	0.234	0	0	interacts with	FZD4 (interacts with) WNT2	0	9606.ENSP00000434034	9606.ENSP00000265441	0.258	FALSE	interacts with	FZD4 (interacts with) WNT2
0.995	1468	0.062	0.999	0.8	2	0.093	0	0	interacts with	FZD4 (interacts with) LRP6	0	9606.ENSP00000434034	9606.ENSP00000261349	0	FALSE	interacts with	FZD4 (interacts with) LRP6
0.495	1470	0	0.841	0.65	3.57895	0.173	0	0	interacts with	FZD4 (interacts with) WNT10A	0	9606.ENSP00000434034	9606.ENSP00000258411	0	FALSE	interacts with	FZD4 (interacts with) WNT10A
0.762	1472	0.057	0.931	0.65	3.42857	0.234	0	0	interacts with	FZD4 (interacts with) WNT6	0	9606.ENSP00000434034	9606.ENSP00000233948	0	FALSE	interacts with	FZD4 (interacts with) WNT6
0.553	1474	0	0.897	0.65	2	0.234	0	0	interacts with	FZD4 (interacts with) WNT3	0	9606.ENSP00000434034	9606.ENSP00000225512	0.244	FALSE	interacts with	FZD4 (interacts with) WNT3
0.712	1476	0	0.916	0.65	3.57895	0.234	0	0	interacts with	FZD4 (interacts with) WNT16	0	9606.ENSP00000434034	9606.ENSP00000222462	0	FALSE	interacts with	FZD4 (interacts with) WNT16
0.275	1478	0.067	0.742	0.65	2	0	0	0.671	interacts with	FZD4 (interacts with) SFRP1	0	9606.ENSP00000434034	9606.ENSP00000220772	0	FALSE	interacts with	FZD4 (interacts with) SFRP1
0.663	1480	0	0.728	0	2.30435	0.226	0	0	interacts with	RYK (interacts with) WNT8A	0	9606.ENSP00000478721	9606.ENSP00000426653	0	FALSE	interacts with	RYK (interacts with) WNT8A
0.368	1482	0	0.401	0	14.1667	0.091	0	0	interacts with	RYK (interacts with) SFRP4	0	9606.ENSP00000478721	9606.ENSP00000410715	0	FALSE	interacts with	RYK (interacts with) SFRP4
0.79	1484	0	0.982	0.9	5.53968	0.226	0	0	interacts with	RYK (interacts with) WNT5B	0	9606.ENSP00000478721	9606.ENSP00000380379	0	FALSE	interacts with	RYK (interacts with) WNT5B
0.638	1488	0.047	0.925	0.8	8	0	0	0	interacts with	RYK (interacts with) VANGL2	0	9606.ENSP00000478721	9606.ENSP00000357040	0	FALSE	interacts with	RYK (interacts with) VANGL2
0.416	1490	0.049	0.421	0	11.1345	0	0	0	interacts with	RYK (interacts with) WLS	0	9606.ENSP00000478721	9606.ENSP00000346829	0	FALSE	interacts with	RYK (interacts with) WLS
0.732	1492	0	0.784	0	1	0.226	0	0	interacts with	RYK (interacts with) WNT7B	0	9606.ENSP00000478721	9606.ENSP00000341032	0	FALSE	interacts with	RYK (interacts with) WNT7B
0.786	1494	0	0.827	0	2.30435	0.226	0	0	interacts with	RYK (interacts with) WNT8B	0	9606.ENSP00000478721	9606.ENSP00000340677	0	FALSE	interacts with	RYK (interacts with) WNT8B
0.992	1496	0	0.994	0	2.57895	0.226	0	0	interacts with	RYK (interacts with) WNT11	0	9606.ENSP00000478721	9606.ENSP00000325526	0	FALSE	interacts with	RYK (interacts with) WNT11
0.472	1498	0	0.549	0	2.57895	0.18	0	0	interacts with	RYK (interacts with) WNT10B	0	9606.ENSP00000478721	9606.ENSP00000301061	0	FALSE	interacts with	RYK (interacts with) WNT10B
0.41	1500	0	0.495	0	3	0.18	0	0	interacts with	RYK (interacts with) WNT9B	0	9606.ENSP00000478721	9606.ENSP00000290015	0	FALSE	interacts with	RYK (interacts with) WNT9B
0.366	1502	0.055	0.375	0	9.57895	0	0	0.577	interacts with	RYK (interacts with) WIF1	0	9606.ENSP00000478721	9606.ENSP00000286574	0	FALSE	interacts with	RYK (interacts with) WIF1
0.958	1504	0.048	0.966	0	1	0.226	0	0	interacts with	RYK (interacts with) WNT7A	0	9606.ENSP00000478721	9606.ENSP00000285018	0	FALSE	interacts with	RYK (interacts with) WNT7A
0.464	1506	0	0.492	0	18.5	0.091	0	0	interacts with	RYK (interacts with) SFRP2	0	9606.ENSP00000478721	9606.ENSP00000274063	0	FALSE	interacts with	RYK (interacts with) SFRP2
0.428	1508	0	0.511	0	3	0.18	0	0	interacts with	RYK (interacts with) WNT9A	0	9606.ENSP00000478721	9606.ENSP00000272164	0	FALSE	interacts with	RYK (interacts with) WNT9A
0.403	1510	0	0.434	0	18.598	0.091	0	0	interacts with	RYK (interacts with) SFRP5	0	9606.ENSP00000478721	9606.ENSP00000266066	0	FALSE	interacts with	RYK (interacts with) SFRP5
0.588	1512	0	0.667	0	1	0.226	0	0	interacts with	RYK (interacts with) WNT2	0	9606.ENSP00000478721	9606.ENSP00000265441	0	FALSE	interacts with	RYK (interacts with) WNT2
0.43	1514	0	0.512	0	9.57895	0.18	0	0	interacts with	RYK (interacts with) WNT10A	0	9606.ENSP00000478721	9606.ENSP00000258411	0	FALSE	interacts with	RYK (interacts with) WNT10A
0.526	1516	0	0.617	0	2.42857	0.226	0	0	interacts with	RYK (interacts with) WNT6	0	9606.ENSP00000478721	9606.ENSP00000233948	0	FALSE	interacts with	RYK (interacts with) WNT6
0.879	1518	0	0.949	0.5	1	0.226	0	0	interacts with	RYK (interacts with) WNT3	0	9606.ENSP00000478721	9606.ENSP00000225512	0	FALSE	interacts with	RYK (interacts with) WNT3
0.448	1520	0	0.555	0	7.24561	0.226	0	0	interacts with	RYK (interacts with) WNT16	0	9606.ENSP00000478721	9606.ENSP00000222462	0	FALSE	interacts with	RYK (interacts with) WNT16
0.706	1522	0.049	0.724	0	8	0.091	0	0	interacts with	RYK (interacts with) SFRP1	0	9606.ENSP00000478721	9606.ENSP00000220772	0	FALSE	interacts with	RYK (interacts with) SFRP1
0.849	1524	0.059	0.953	0.65	59.625	0.169	0	0	interacts with	DVL1 (interacts with) FZD4	0	9606.ENSP00000368166	9606.ENSP00000434034	0	FALSE	interacts with	DVL1 (interacts with) FZD4
0.908	1526	0.049	0.917	0	53	0.129	0	0	interacts with	DVL1 (interacts with) RYK	0	9606.ENSP00000368166	9606.ENSP00000478721	0	FALSE	interacts with	DVL1 (interacts with) RYK
0.52	1528	0	0.773	0.5	54.4286	0.132	0	0	interacts with	DVL1 (interacts with) WNT5B	0	9606.ENSP00000368166	9606.ENSP00000380379	0	FALSE	interacts with	DVL1 (interacts with) WNT5B
0.457	1530	0	0.743	0.5	54.3043	0.132	0	0	interacts with	DVL1 (interacts with) WNT8A	0	9606.ENSP00000368166	9606.ENSP00000426653	0	FALSE	interacts with	DVL1 (interacts with) WNT8A
0.444	1532	0	0.503	0	54.6667	0.143	0	0	interacts with	DVL1 (interacts with) SFRP4	0	9606.ENSP00000368166	9606.ENSP00000410715	0	FALSE	interacts with	DVL1 (interacts with) SFRP4
0.348	1534	0.053	0.401	0	58.3333	0.108	0	0	interacts with	DVL1 (interacts with) LRP5L	0	9606.ENSP00000368166	9606.ENSP00000482378	0	FALSE	interacts with	DVL1 (interacts with) LRP5L
0.318	1536	0.067	0.337	0	55	0	0	0	interacts with	DVL1 (interacts with) NOTUM	0	9606.ENSP00000368166	9606.ENSP00000387310	0	FALSE	interacts with	DVL1 (interacts with) NOTUM
0.517	1538	0	0.58	0	53	0.166	0	0	interacts with	DVL1 (interacts with) ROR2	0	9606.ENSP00000368166	9606.ENSP00000364860	0	FALSE	interacts with	DVL1 (interacts with) ROR2
0.609	1540	0.067	0.879	0.65	59.625	0.169	0	0	interacts with	DVL1 (interacts with) FZD8	0	9606.ENSP00000368166	9606.ENSP00000363826	0	FALSE	interacts with	DVL1 (interacts with) FZD8
0.904	1542	0	0.913	0	56.5179	0.133	0	0	interacts with	DVL1 (interacts with) MUSK	0	9606.ENSP00000368166	9606.ENSP00000363571	0	FALSE	interacts with	DVL1 (interacts with) MUSK
0.976	1546	0	0.998	0.9	53	0.409	0	0	interacts with	DVL1 (interacts with) VANGL2	0	9606.ENSP00000368166	9606.ENSP00000357040	0	FALSE	interacts with	DVL1 (interacts with) VANGL2
0.878	1548	0	0.961	0.65	59.625	0.169	0	0	interacts with	DVL1 (interacts with) FZD5	0	9606.ENSP00000368166	9606.ENSP00000354607	0	FALSE	interacts with	DVL1 (interacts with) FZD5
0.888	1550	0	0.964	0.65	53	0.165	0	0	interacts with	DVL1 (interacts with) FZD6	0	9606.ENSP00000368166	9606.ENSP00000351605	0	FALSE	interacts with	DVL1 (interacts with) FZD6
0.451	1552	0	0.451	0	54.5789	0	0	0	interacts with	DVL1 (interacts with) WLS	0	9606.ENSP00000368166	9606.ENSP00000346829	0	FALSE	interacts with	DVL1 (interacts with) WLS
0.655	1554	0.094	0.897	0.65	53	0.169	0	0	interacts with	DVL1 (interacts with) FZD9	0	9606.ENSP00000368166	9606.ENSP00000345785	0	FALSE	interacts with	DVL1 (interacts with) FZD9
0.767	1556	0.048	0.791	0	53	0.132	0	0	interacts with	DVL1 (interacts with) WNT7B	0	9606.ENSP00000368166	9606.ENSP00000341032	0	FALSE	interacts with	DVL1 (interacts with) WNT7B
0.417	1558	0	0.725	0.5	54.3043	0.132	0	0	interacts with	DVL1 (interacts with) WNT8B	0	9606.ENSP00000368166	9606.ENSP00000340677	0	FALSE	interacts with	DVL1 (interacts with) WNT8B
0.908	1560	0	0.956	0.5	54.5789	0.132	0	0	interacts with	DVL1 (interacts with) WNT11	0	9606.ENSP00000368166	9606.ENSP00000325526	0	FALSE	interacts with	DVL1 (interacts with) WNT11
0.802	1562	0.067	0.939	0.65	59.625	0.169	0	0	interacts with	DVL1 (interacts with) FZD2	0	9606.ENSP00000368166	9606.ENSP00000323901	0	FALSE	interacts with	DVL1 (interacts with) FZD2
0.533	1564	0.072	0.548	0	55	0	0	0	interacts with	DVL1 (interacts with) PORCN	0	9606.ENSP00000368166	9606.ENSP00000322304	0	FALSE	interacts with	DVL1 (interacts with) PORCN
0.501	1566	0.062	0.966	0.9	53	0.367	0	0.966	interacts with	DVL1 (interacts with) DVL3	0	9606.ENSP00000368166	9606.ENSP00000316054	0.056	FALSE	interacts with	DVL1 (interacts with) DVL3
0.542	1568	0.076	0.599	0	54.5789	0.129	0	0	interacts with	DVL1 (interacts with) WNT10B	0	9606.ENSP00000368166	9606.ENSP00000301061	0	FALSE	interacts with	DVL1 (interacts with) WNT10B
0.929	1570	0.067	0.996	0.9	55	0.506	0	0	interacts with	DVL1 (interacts with) NKD2	0	9606.ENSP00000368166	9606.ENSP00000296849	0	FALSE	interacts with	DVL1 (interacts with) NKD2
0.555	1572	0	0.602	0	69.625	0.143	0	0	interacts with	DVL1 (interacts with) FRZB	0	9606.ENSP00000368166	9606.ENSP00000295113	0	FALSE	interacts with	DVL1 (interacts with) FRZB
0.997	1574	0.128	0.999	0.65	53	0.108	0	0	interacts with	DVL1 (interacts with) LRP5	0	9606.ENSP00000368166	9606.ENSP00000294304	0	FALSE	interacts with	DVL1 (interacts with) LRP5
0.517	1576	0	0.561	0	53	0.129	0	0	interacts with	DVL1 (interacts with) WNT9B	0	9606.ENSP00000368166	9606.ENSP00000290015	0	FALSE	interacts with	DVL1 (interacts with) WNT9B
0.936	1578	0.067	0.98	0.65	59.625	0.169	0	0	interacts with	DVL1 (interacts with) FZD1	0	9606.ENSP00000368166	9606.ENSP00000287934	0	FALSE	interacts with	DVL1 (interacts with) FZD1
0.533	1580	0	0.533	0	54.5789	0	0	0	interacts with	DVL1 (interacts with) WIF1	0	9606.ENSP00000368166	9606.ENSP00000286574	0	FALSE	interacts with	DVL1 (interacts with) WIF1
0.969	1582	0	0.992	0.65	59.625	0.386	0	0	interacts with	DVL1 (interacts with) FZD7	0	9606.ENSP00000368166	9606.ENSP00000286201	0	FALSE	interacts with	DVL1 (interacts with) FZD7
0.858	1584	0.042	0.872	0	53	0.132	0	0	interacts with	DVL1 (interacts with) WNT7A	0	9606.ENSP00000368166	9606.ENSP00000285018	0	FALSE	interacts with	DVL1 (interacts with) WNT7A
0.524	1586	0	0.587	0	54.6667	0.169	0	0	interacts with	DVL1 (interacts with) SFRP2	0	9606.ENSP00000368166	9606.ENSP00000274063	0	FALSE	interacts with	DVL1 (interacts with) SFRP2
0.518	1588	0.049	0.566	0	53	0.129	0	0	interacts with	DVL1 (interacts with) WNT9A	0	9606.ENSP00000368166	9606.ENSP00000272164	0	FALSE	interacts with	DVL1 (interacts with) WNT9A
0.889	1590	0	0.991	0.9	53	0.332	0	0	interacts with	DVL1 (interacts with) NKD1	0	9606.ENSP00000368166	9606.ENSP00000268459	0	FALSE	interacts with	DVL1 (interacts with) NKD1
0.436	1592	0	0.511	0	54.7647	0.169	0	0	interacts with	DVL1 (interacts with) SFRP5	0	9606.ENSP00000368166	9606.ENSP00000266066	0	FALSE	interacts with	DVL1 (interacts with) SFRP5
0.7	1594	0	0.819	0.36	53	0.132	0	0	interacts with	DVL1 (interacts with) WNT2	0	9606.ENSP00000368166	9606.ENSP00000265441	0	FALSE	interacts with	DVL1 (interacts with) WNT2
0.994	1596	0.053	0.998	0.65	53	0.108	0	0	interacts with	DVL1 (interacts with) LRP6	0	9606.ENSP00000368166	9606.ENSP00000261349	0	FALSE	interacts with	DVL1 (interacts with) LRP6
0.462	1598	0	0.511	0	54.5789	0.129	0	0	interacts with	DVL1 (interacts with) WNT10A	0	9606.ENSP00000368166	9606.ENSP00000258411	0	FALSE	interacts with	DVL1 (interacts with) WNT10A
0.867	1600	0	0.958	0.65	53	0.169	0	0	interacts with	DVL1 (interacts with) FZD3	0	9606.ENSP00000368166	9606.ENSP00000240093	0	FALSE	interacts with	DVL1 (interacts with) FZD3
0.517	1602	0	0.563	0	54.4286	0.132	0	0	interacts with	DVL1 (interacts with) WNT6	0	9606.ENSP00000368166	9606.ENSP00000233948	0	FALSE	interacts with	DVL1 (interacts with) WNT6
0.465	1604	0.052	0.832	0.65	67.125	0.169	0	0	interacts with	DVL1 (interacts with) FZD10	0	9606.ENSP00000368166	9606.ENSP00000229030	0	FALSE	interacts with	DVL1 (interacts with) FZD10
0.614	1606	0	0.767	0.36	53	0.132	0	0	interacts with	DVL1 (interacts with) WNT3	0	9606.ENSP00000368166	9606.ENSP00000225512	0	FALSE	interacts with	DVL1 (interacts with) WNT3
0.476	1608	0	0.526	0	54.5789	0.132	0	0	interacts with	DVL1 (interacts with) WNT16	0	9606.ENSP00000368166	9606.ENSP00000222462	0	FALSE	interacts with	DVL1 (interacts with) WNT16
0.771	1610	0	0.802	0	53	0.169	0	0	interacts with	DVL1 (interacts with) SFRP1	0	9606.ENSP00000368166	9606.ENSP00000220772	0	FALSE	interacts with	DVL1 (interacts with) SFRP1
0.54	1612	0.052	0.588	0	53.3043	0.131	0	0	interacts with	ROR2 (interacts with) WNT8A	0	9606.ENSP00000364860	9606.ENSP00000426653	0	FALSE	interacts with	ROR2 (interacts with) WNT8A
0.426	1614	0	0.491	0	52	0.091	0	0.631	interacts with	ROR2 (interacts with) RYK	0	9606.ENSP00000364860	9606.ENSP00000478721	0.102	FALSE	interacts with	ROR2 (interacts with) RYK
0.409	1616	0.072	0.482	0	56.5397	0.131	0	0	interacts with	ROR2 (interacts with) WNT5B	0	9606.ENSP00000364860	9606.ENSP00000380379	0	FALSE	interacts with	ROR2 (interacts with) WNT5B
0.227	1618	0.076	0.309	0	60.6667	0.11	0	0	interacts with	ROR2 (interacts with) SFRP4	0	9606.ENSP00000364860	9606.ENSP00000410715	0	FALSE	interacts with	ROR2 (interacts with) SFRP4
0.458	1622	0.067	0.89	0.8	59	0	0	0	interacts with	ROR2 (interacts with) VANGL2	0	9606.ENSP00000364860	9606.ENSP00000357040	0	FALSE	interacts with	ROR2 (interacts with) VANGL2
0.337	1624	0.064	0.353	0	60.5789	0	0	0	interacts with	ROR2 (interacts with) WLS	0	9606.ENSP00000364860	9606.ENSP00000346829	0	FALSE	interacts with	ROR2 (interacts with) WLS
0.35	1626	0.052	0.417	0	52	0.131	0	0	interacts with	ROR2 (interacts with) WNT7B	0	9606.ENSP00000364860	9606.ENSP00000341032	0	FALSE	interacts with	ROR2 (interacts with) WNT7B
0.307	1628	0.052	0.38	0	53.3043	0.131	0	0	interacts with	ROR2 (interacts with) WNT8B	0	9606.ENSP00000364860	9606.ENSP00000340677	0	FALSE	interacts with	ROR2 (interacts with) WNT8B
0.853	1630	0.068	0.871	0	53.5789	0.131	0	0	interacts with	ROR2 (interacts with) WNT11	0	9606.ENSP00000364860	9606.ENSP00000325526	0	FALSE	interacts with	ROR2 (interacts with) WNT11
0.277	1632	0.052	0.334	0	53.5789	0.106	0	0	interacts with	ROR2 (interacts with) WNT10B	0	9606.ENSP00000364860	9606.ENSP00000301061	0	FALSE	interacts with	ROR2 (interacts with) WNT10B
0.238	1634	0.052	0.298	0	54	0.106	0	0	interacts with	ROR2 (interacts with) WNT9B	0	9606.ENSP00000364860	9606.ENSP00000290015	0	FALSE	interacts with	ROR2 (interacts with) WNT9B
0.286	1636	0.1	0.33	0	60.5789	0	0	0	interacts with	ROR2 (interacts with) WIF1	0	9606.ENSP00000364860	9606.ENSP00000286574	0	FALSE	interacts with	ROR2 (interacts with) WIF1
0.615	1638	0.052	0.655	0	52	0.131	0	0	interacts with	ROR2 (interacts with) WNT7A	0	9606.ENSP00000364860	9606.ENSP00000285018	0	FALSE	interacts with	ROR2 (interacts with) WNT7A
0.362	1640	0.121	0.46	0	63	0.113	0	0	interacts with	ROR2 (interacts with) SFRP2	0	9606.ENSP00000364860	9606.ENSP00000274063	0	FALSE	interacts with	ROR2 (interacts with) SFRP2
0.262	1642	0.052	0.32	0	54	0.106	0	0	interacts with	ROR2 (interacts with) WNT9A	0	9606.ENSP00000364860	9606.ENSP00000272164	0	FALSE	interacts with	ROR2 (interacts with) WNT9A
0.269	1644	0.062	0.34	0	63.098	0.113	0	0	interacts with	ROR2 (interacts with) SFRP5	0	9606.ENSP00000364860	9606.ENSP00000266066	0	FALSE	interacts with	ROR2 (interacts with) SFRP5
0.433	1646	0.093	0.514	0	52	0.131	0	0	interacts with	ROR2 (interacts with) WNT2	0	9606.ENSP00000364860	9606.ENSP00000265441	0	FALSE	interacts with	ROR2 (interacts with) WNT2
0.202	1648	0.052	0.265	0	60.5789	0.106	0	0	interacts with	ROR2 (interacts with) WNT10A	0	9606.ENSP00000364860	9606.ENSP00000258411	0	FALSE	interacts with	ROR2 (interacts with) WNT10A
0.278	1650	0.052	0.353	0	53.4286	0.131	0	0	interacts with	ROR2 (interacts with) WNT6	0	9606.ENSP00000364860	9606.ENSP00000233948	0	FALSE	interacts with	ROR2 (interacts with) WNT6
0.311	1652	0.052	0.383	0	52	0.131	0	0	interacts with	ROR2 (interacts with) WNT3	0	9606.ENSP00000364860	9606.ENSP00000225512	0	FALSE	interacts with	ROR2 (interacts with) WNT3
0.314	1654	0.052	0.385	0	58.2456	0.131	0	0	interacts with	ROR2 (interacts with) WNT16	0	9606.ENSP00000364860	9606.ENSP00000222462	0	FALSE	interacts with	ROR2 (interacts with) WNT16
0.352	1656	0.092	0.433	0	59	0.113	0	0	interacts with	ROR2 (interacts with) SFRP1	0	9606.ENSP00000364860	9606.ENSP00000220772	0	FALSE	interacts with	ROR2 (interacts with) SFRP1
0.621	1658	0	0.962	0.9	52.7857	0.091	0	0	interacts with	FZD8 (interacts with) RYK	0	9606.ENSP00000363826	9606.ENSP00000478721	0	FALSE	interacts with	FZD8 (interacts with) RYK
0.863	1660	0.064	0.961	0.65	52.4286	0.234	0	0	interacts with	FZD8 (interacts with) WNT5B	0	9606.ENSP00000363826	9606.ENSP00000380379	0	FALSE	interacts with	FZD8 (interacts with) WNT5B
0.677	1662	0	0.951	0.65	52.3043	0.602	0	0	interacts with	FZD8 (interacts with) WNT8A	0	9606.ENSP00000363826	9606.ENSP00000426653	0	FALSE	interacts with	FZD8 (interacts with) WNT8A
0.405	1664	0.072	0.805	0.65	53.0833	0.113	0	0	interacts with	FZD8 (interacts with) ROR2	0	9606.ENSP00000363826	9606.ENSP00000364860	0	FALSE	interacts with	FZD8 (interacts with) ROR2
0.205	1666	0.06	0.715	0.65	52.6667	0	0	0.697	interacts with	FZD8 (interacts with) SFRP4	0	9606.ENSP00000363826	9606.ENSP00000410715	0	FALSE	interacts with	FZD8 (interacts with) SFRP4
0.382	1668	0	0.382	0	53	0	0	0	interacts with	FZD8 (interacts with) NOTUM	0	9606.ENSP00000363826	9606.ENSP00000387310	0	FALSE	interacts with	FZD8 (interacts with) NOTUM
0.15	1670	0.062	0.19	0	105.315	0.065	0	0	interacts with	FZD8 (interacts with) GPC3	0	9606.ENSP00000363826	9606.ENSP00000377836	0	FALSE	interacts with	FZD8 (interacts with) GPC3
0.213	1672	0	0.269	0	57.0179	0.11	0	0	interacts with	FZD8 (interacts with) MUSK	0	9606.ENSP00000363826	9606.ENSP00000363571	0	FALSE	interacts with	FZD8 (interacts with) MUSK
0.602	1676	0.065	0.665	0	52.4706	0.172	0	0	interacts with	FZD8 (interacts with) VANGL2	0	9606.ENSP00000363826	9606.ENSP00000357040	0	FALSE	interacts with	FZD8 (interacts with) VANGL2
0.327	1678	0.062	0.342	0	53.9678	0	0	0	interacts with	FZD8 (interacts with) WLS	0	9606.ENSP00000363826	9606.ENSP00000346829	0	FALSE	interacts with	FZD8 (interacts with) WLS
0.112	1680	0.067	0.153	0	119.25	0	0	0.896	interacts with	FZD8 (interacts with) FZD9	0	9606.ENSP00000363826	9606.ENSP00000345785	0.06	FALSE	interacts with	FZD8 (interacts with) FZD9
0.738	1682	0.044	0.923	0.65	51	0.234	0	0	interacts with	FZD8 (interacts with) WNT7B	0	9606.ENSP00000363826	9606.ENSP00000341032	0	FALSE	interacts with	FZD8 (interacts with) WNT7B
0.502	1684	0	0.855	0.65	52.3043	0.234	0	0	interacts with	FZD8 (interacts with) WNT8B	0	9606.ENSP00000363826	9606.ENSP00000340677	0	FALSE	interacts with	FZD8 (interacts with) WNT8B
0.928	1686	0	0.994	0.9	52.5789	0.234	0	0	interacts with	FZD8 (interacts with) WNT11	0	9606.ENSP00000363826	9606.ENSP00000325526	0	FALSE	interacts with	FZD8 (interacts with) WNT11
0.539	1688	0	0.539	0	54.7857	0	0	0	interacts with	FZD8 (interacts with) PORCN	0	9606.ENSP00000363826	9606.ENSP00000322304	0	FALSE	interacts with	FZD8 (interacts with) PORCN
0.7	1690	0	0.905	0.65	52.5789	0.173	0	0	interacts with	FZD8 (interacts with) WNT10B	0	9606.ENSP00000363826	9606.ENSP00000301061	0	FALSE	interacts with	FZD8 (interacts with) WNT10B
0.367	1692	0	0.379	0	54.9231	0.06	0	0	interacts with	FZD8 (interacts with) NKD2	0	9606.ENSP00000363826	9606.ENSP00000296849	0	FALSE	interacts with	FZD8 (interacts with) NKD2
0.817	1694	0.08	0.974	0.8	51	0.33	0	0	interacts with	FZD8 (interacts with) LRP5	0	9606.ENSP00000363826	9606.ENSP00000294304	0	FALSE	interacts with	FZD8 (interacts with) LRP5
0.489	1696	0	0.839	0.65	51	0.173	0	0	interacts with	FZD8 (interacts with) WNT9B	0	9606.ENSP00000363826	9606.ENSP00000290015	0	FALSE	interacts with	FZD8 (interacts with) WNT9B
0.481	1698	0.046	0.498	0	52.5789	0.067	0	0	interacts with	FZD8 (interacts with) WIF1	0	9606.ENSP00000363826	9606.ENSP00000286574	0	FALSE	interacts with	FZD8 (interacts with) WIF1
0.532	1700	0	0.863	0.65	51	0.234	0	0	interacts with	FZD8 (interacts with) WNT7A	0	9606.ENSP00000363826	9606.ENSP00000285018	0	FALSE	interacts with	FZD8 (interacts with) WNT7A
0.448	1702	0.093	0.809	0.65	52.6667	0	0	0.703	interacts with	FZD8 (interacts with) SFRP2	0	9606.ENSP00000363826	9606.ENSP00000274063	0	FALSE	interacts with	FZD8 (interacts with) SFRP2
0.544	1704	0.074	0.861	0.65	51	0.173	0	0	interacts with	FZD8 (interacts with) WNT9A	0	9606.ENSP00000363826	9606.ENSP00000272164	0	FALSE	interacts with	FZD8 (interacts with) WNT9A
0.321	1706	0	0.335	0	51	0.06	0	0	interacts with	FZD8 (interacts with) NKD1	0	9606.ENSP00000363826	9606.ENSP00000268459	0	FALSE	interacts with	FZD8 (interacts with) NKD1
0.143	1708	0.057	0.692	0.65	54.3272	0	0	0.675	interacts with	FZD8 (interacts with) SFRP5	0	9606.ENSP00000363826	9606.ENSP00000266066	0	FALSE	interacts with	FZD8 (interacts with) SFRP5
0.872	1710	0	0.962	0.65	51	0.234	0	0	interacts with	FZD8 (interacts with) WNT2	0	9606.ENSP00000363826	9606.ENSP00000265441	0	FALSE	interacts with	FZD8 (interacts with) WNT2
0.947	1712	0.062	0.994	0.8	51	0.536	0	0	interacts with	FZD8 (interacts with) LRP6	0	9606.ENSP00000363826	9606.ENSP00000261349	0	FALSE	interacts with	FZD8 (interacts with) LRP6
0.709	1714	0	0.908	0.65	52.5789	0.173	0	0	interacts with	FZD8 (interacts with) WNT10A	0	9606.ENSP00000363826	9606.ENSP00000258411	0	FALSE	interacts with	FZD8 (interacts with) WNT10A
0.678	1716	0	0.906	0.65	52.4286	0.234	0	0	interacts with	FZD8 (interacts with) WNT6	0	9606.ENSP00000363826	9606.ENSP00000233948	0	FALSE	interacts with	FZD8 (interacts with) WNT6
0.937	1718	0	0.998	0.65	51	0.92	0	0	interacts with	FZD8 (interacts with) WNT3	0	9606.ENSP00000363826	9606.ENSP00000225512	0	FALSE	interacts with	FZD8 (interacts with) WNT3
0.649	1720	0	0.897	0.65	52.5789	0.234	0	0	interacts with	FZD8 (interacts with) WNT16	0	9606.ENSP00000363826	9606.ENSP00000222462	0	FALSE	interacts with	FZD8 (interacts with) WNT16
0.304	1722	0.123	0.768	0.65	51	0	0	0.648	interacts with	FZD8 (interacts with) SFRP1	0	9606.ENSP00000363826	9606.ENSP00000220772	0	FALSE	interacts with	FZD8 (interacts with) SFRP1
0.588	1724	0.083	0.859	0.65	51.4286	0.061	0	0	interacts with	DKK1 (interacts with) WNT5B	0	9606.ENSP00000363081	9606.ENSP00000380379	0	FALSE	interacts with	DKK1 (interacts with) WNT5B
0.574	1726	0	0.847	0.65	51.3043	0.061	0	0	interacts with	DKK1 (interacts with) WNT8A	0	9606.ENSP00000363081	9606.ENSP00000426653	0	FALSE	interacts with	DKK1 (interacts with) WNT8A
0.757	1728	0.097	0.776	0	50	0.063	0	0	interacts with	DKK1 (interacts with) FZD8	0	9606.ENSP00000363081	9606.ENSP00000363826	0	FALSE	interacts with	DKK1 (interacts with) FZD8
0.68	1730	0	0.68	0	51.6667	0	0	0	interacts with	DKK1 (interacts with) SFRP4	0	9606.ENSP00000363081	9606.ENSP00000410715	0	FALSE	interacts with	DKK1 (interacts with) SFRP4
0.662	1732	0	0.665	0	58.3333	0.051	0	0	interacts with	DKK1 (interacts with) DVL1	0	9606.ENSP00000363081	9606.ENSP00000368166	0	FALSE	interacts with	DKK1 (interacts with) DVL1
0.607	1734	0.054	0.621	0	50	0.063	0	0	interacts with	DKK1 (interacts with) FZD4	0	9606.ENSP00000363081	9606.ENSP00000434034	0	FALSE	interacts with	DKK1 (interacts with) FZD4
0.556	1736	0.042	0.557	0	51.7857	0	0	0	interacts with	DKK1 (interacts with) RYK	0	9606.ENSP00000363081	9606.ENSP00000478721	0	FALSE	interacts with	DKK1 (interacts with) RYK
0.393	1738	0	0.518	0	59.5	0.239	0	0	interacts with	DKK1 (interacts with) LRP5L	0	9606.ENSP00000363081	9606.ENSP00000482378	0	FALSE	interacts with	DKK1 (interacts with) LRP5L
0.434	1740	0	0.434	0	52	0	0	0	interacts with	DKK1 (interacts with) NOTUM	0	9606.ENSP00000363081	9606.ENSP00000387310	0	FALSE	interacts with	DKK1 (interacts with) NOTUM
0.407	1742	0.068	0.424	0	58.1905	0	0	0	interacts with	DKK1 (interacts with) GPC3	0	9606.ENSP00000363081	9606.ENSP00000377836	0	FALSE	interacts with	DKK1 (interacts with) GPC3
0.36	1744	0.045	0.382	0	52.0833	0.071	0	0	interacts with	DKK1 (interacts with) ROR2	0	9606.ENSP00000363081	9606.ENSP00000364860	0	FALSE	interacts with	DKK1 (interacts with) ROR2
0.155	1746	0.045	0.184	0	54.8304	0.071	0	0	interacts with	DKK1 (interacts with) MUSK	0	9606.ENSP00000363081	9606.ENSP00000363571	0	FALSE	interacts with	DKK1 (interacts with) MUSK
0.327	1750	0	0.327	0	51.4706	0	0	0	interacts with	DKK1 (interacts with) VANGL2	0	9606.ENSP00000363081	9606.ENSP00000357040	0	FALSE	interacts with	DKK1 (interacts with) VANGL2
0.562	1752	0.078	0.589	0	50	0.063	0	0	interacts with	DKK1 (interacts with) FZD5	0	9606.ENSP00000363081	9606.ENSP00000354607	0	FALSE	interacts with	DKK1 (interacts with) FZD5
0.5	1754	0.107	0.544	0	53.5714	0.062	0	0	interacts with	DKK1 (interacts with) FZD6	0	9606.ENSP00000363081	9606.ENSP00000351605	0	FALSE	interacts with	DKK1 (interacts with) FZD6
0.38	1756	0.084	0.408	0	52.9678	0	0	0	interacts with	DKK1 (interacts with) WLS	0	9606.ENSP00000363081	9606.ENSP00000346829	0	FALSE	interacts with	DKK1 (interacts with) WLS
0.526	1758	0.054	0.543	0	50	0.063	0	0	interacts with	DKK1 (interacts with) FZD9	0	9606.ENSP00000363081	9606.ENSP00000345785	0	FALSE	interacts with	DKK1 (interacts with) FZD9
0.641	1760	0.06	0.876	0.65	50	0.073	0	0	interacts with	DKK1 (interacts with) WNT7B	0	9606.ENSP00000363081	9606.ENSP00000341032	0	FALSE	interacts with	DKK1 (interacts with) WNT7B
0.553	1762	0	0.84	0.65	51.3043	0.061	0	0	interacts with	DKK1 (interacts with) WNT8B	0	9606.ENSP00000363081	9606.ENSP00000340677	0	FALSE	interacts with	DKK1 (interacts with) WNT8B
0.64	1764	0	0.871	0.65	51.5789	0.061	0	0	interacts with	DKK1 (interacts with) WNT11	0	9606.ENSP00000363081	9606.ENSP00000325526	0	FALSE	interacts with	DKK1 (interacts with) WNT11
0.592	1766	0.096	0.765	0.4	50	0.063	0	0	interacts with	DKK1 (interacts with) FZD2	0	9606.ENSP00000363081	9606.ENSP00000323901	0	FALSE	interacts with	DKK1 (interacts with) FZD2
0.484	1768	0	0.484	0	53.7857	0	0	0	interacts with	DKK1 (interacts with) PORCN	0	9606.ENSP00000363081	9606.ENSP00000322304	0	FALSE	interacts with	DKK1 (interacts with) PORCN
0.418	1770	0	0.424	0	58.3333	0.051	0	0	interacts with	DKK1 (interacts with) DVL3	0	9606.ENSP00000363081	9606.ENSP00000316054	0	FALSE	interacts with	DKK1 (interacts with) DVL3
0.685	1772	0	0.885	0.65	51.5789	0.045	0	0	interacts with	DKK1 (interacts with) WNT10B	0	9606.ENSP00000363081	9606.ENSP00000301061	0	FALSE	interacts with	DKK1 (interacts with) WNT10B
0.384	1774	0	0.384	0	53.9231	0	0	0	interacts with	DKK1 (interacts with) NKD2	0	9606.ENSP00000363081	9606.ENSP00000296849	0	FALSE	interacts with	DKK1 (interacts with) NKD2
0.869	1776	0	0.869	0	60	0	0	0	interacts with	DKK1 (interacts with) FRZB	0	9606.ENSP00000363081	9606.ENSP00000295113	0	FALSE	interacts with	DKK1 (interacts with) FRZB
0.998	1778	0.072	0.999	0.9	50	0.677	0	0	interacts with	DKK1 (interacts with) LRP5	0	9606.ENSP00000363081	9606.ENSP00000294304	0	FALSE	interacts with	DKK1 (interacts with) LRP5
0.616	1780	0	0.86	0.65	50	0.045	0	0	interacts with	DKK1 (interacts with) WNT9B	0	9606.ENSP00000363081	9606.ENSP00000290015	0	FALSE	interacts with	DKK1 (interacts with) WNT9B
0.838	1782	0.071	0.904	0.4	56.25	0.063	0	0	interacts with	DKK1 (interacts with) FZD1	0	9606.ENSP00000363081	9606.ENSP00000287934	0	FALSE	interacts with	DKK1 (interacts with) FZD1
0.882	1784	0.045	0.882	0	51.5789	0	0	0	interacts with	DKK1 (interacts with) WIF1	0	9606.ENSP00000363081	9606.ENSP00000286574	0	FALSE	interacts with	DKK1 (interacts with) WIF1
0.542	1786	0.08	0.571	0	50	0.063	0	0	interacts with	DKK1 (interacts with) FZD7	0	9606.ENSP00000363081	9606.ENSP00000286201	0	FALSE	interacts with	DKK1 (interacts with) FZD7
0.406	1788	0.044	0.938	0.9	80	0	0	0.88	interacts with	DKK1 (interacts with) DKK2	0	9606.ENSP00000363081	9606.ENSP00000285311	0	FALSE	interacts with	DKK1 (interacts with) DKK2
0.656	1790	0.042	0.878	0.65	50	0.073	0	0	interacts with	DKK1 (interacts with) WNT7A	0	9606.ENSP00000363081	9606.ENSP00000285018	0	FALSE	interacts with	DKK1 (interacts with) WNT7A
0.83	1792	0.1	0.848	0	51.6667	0.088	0	0	interacts with	DKK1 (interacts with) SFRP2	0	9606.ENSP00000363081	9606.ENSP00000274063	0	FALSE	interacts with	DKK1 (interacts with) SFRP2
0.553	1794	0.062	0.841	0.65	50	0.045	0	0	interacts with	DKK1 (interacts with) WNT9A	0	9606.ENSP00000363081	9606.ENSP00000272164	0	FALSE	interacts with	DKK1 (interacts with) WNT9A
0.685	1796	0.067	0.693	0	50	0	0	0	interacts with	DKK1 (interacts with) NKD1	0	9606.ENSP00000363081	9606.ENSP00000268459	0	FALSE	interacts with	DKK1 (interacts with) NKD1
0.613	1798	0.059	0.633	0	53.3272	0.073	0	0	interacts with	DKK1 (interacts with) SFRP5	0	9606.ENSP00000363081	9606.ENSP00000266066	0	FALSE	interacts with	DKK1 (interacts with) SFRP5
0.747	1800	0.044	0.909	0.65	50	0.061	0	0	interacts with	DKK1 (interacts with) WNT2	0	9606.ENSP00000363081	9606.ENSP00000265441	0	FALSE	interacts with	DKK1 (interacts with) WNT2
0.998	1802	0	0.999	0.9	50	0.987	0	0	interacts with	DKK1 (interacts with) LRP6	0	9606.ENSP00000363081	9606.ENSP00000261349	0	FALSE	interacts with	DKK1 (interacts with) LRP6
0.574	1804	0	0.845	0.65	51.5789	0.045	0	0	interacts with	DKK1 (interacts with) WNT10A	0	9606.ENSP00000363081	9606.ENSP00000258411	0	FALSE	interacts with	DKK1 (interacts with) WNT10A
0.468	1806	0.054	0.487	0	55	0.063	0	0	interacts with	DKK1 (interacts with) FZD3	0	9606.ENSP00000363081	9606.ENSP00000240093	0	FALSE	interacts with	DKK1 (interacts with) FZD3
0.846	1808	0	0.945	0.65	51.4286	0.061	0	0	interacts with	DKK1 (interacts with) WNT6	0	9606.ENSP00000363081	9606.ENSP00000233948	0	FALSE	interacts with	DKK1 (interacts with) WNT6
0.455	1810	0.061	0.479	0	63.75	0.063	0	0	interacts with	DKK1 (interacts with) FZD10	0	9606.ENSP00000363081	9606.ENSP00000229030	0	FALSE	interacts with	DKK1 (interacts with) FZD10
0.689	1812	0	0.89	0.65	50	0.073	0	0	interacts with	DKK1 (interacts with) WNT3	0	9606.ENSP00000363081	9606.ENSP00000225512	0	FALSE	interacts with	DKK1 (interacts with) WNT3
0.663	1814	0.043	0.879	0.65	51.5789	0.061	0	0	interacts with	DKK1 (interacts with) WNT16	0	9606.ENSP00000363081	9606.ENSP00000222462	0	FALSE	interacts with	DKK1 (interacts with) WNT16
0.281	1816	0	0.927	0.9	80	0	0	0.835	interacts with	DKK1 (interacts with) DKK4	0	9606.ENSP00000363081	9606.ENSP00000220812	0.07	FALSE	interacts with	DKK1 (interacts with) DKK4
0.873	1818	0.067	0.883	0	50	0.088	0	0	interacts with	DKK1 (interacts with) SFRP1	0	9606.ENSP00000363081	9606.ENSP00000220772	0	FALSE	interacts with	DKK1 (interacts with) SFRP1
0.412	1820	0	0.425	0	50.4286	0.062	0	0	interacts with	VANGL2 (interacts with) WNT5B	0	9606.ENSP00000357040	9606.ENSP00000380379	0	FALSE	interacts with	VANGL2 (interacts with) WNT5B
0.305	1824	0	0.32	0	50.3043	0.062	0	0	interacts with	VANGL2 (interacts with) WNT8A	0	9606.ENSP00000357040	9606.ENSP00000426653	0	FALSE	interacts with	VANGL2 (interacts with) WNT8A
0.228	1826	0.042	0.229	0	52.1345	0	0	0	interacts with	VANGL2 (interacts with) WLS	0	9606.ENSP00000357040	9606.ENSP00000346829	0	FALSE	interacts with	VANGL2 (interacts with) WLS
0.731	1828	0	0.737	0	49	0.062	0	0	interacts with	VANGL2 (interacts with) WNT7B	0	9606.ENSP00000357040	9606.ENSP00000341032	0	FALSE	interacts with	VANGL2 (interacts with) WNT7B
0.227	1830	0	0.244	0	50.3043	0.062	0	0	interacts with	VANGL2 (interacts with) WNT8B	0	9606.ENSP00000357040	9606.ENSP00000340677	0	FALSE	interacts with	VANGL2 (interacts with) WNT8B
0.816	1832	0	0.823	0	50.5789	0.079	0	0	interacts with	VANGL2 (interacts with) WNT11	0	9606.ENSP00000357040	9606.ENSP00000325526	0	FALSE	interacts with	VANGL2 (interacts with) WNT11
0.218	1834	0	0.234	0	50.5789	0.06	0	0	interacts with	VANGL2 (interacts with) WNT10B	0	9606.ENSP00000357040	9606.ENSP00000301061	0	FALSE	interacts with	VANGL2 (interacts with) WNT10B
0.418	1836	0	0.429	0	49	0.06	0	0	interacts with	VANGL2 (interacts with) WNT9B	0	9606.ENSP00000357040	9606.ENSP00000290015	0	FALSE	interacts with	VANGL2 (interacts with) WNT9B
0.225	1838	0.063	0.243	0	50.5789	0	0	0	interacts with	VANGL2 (interacts with) WIF1	0	9606.ENSP00000357040	9606.ENSP00000286574	0	FALSE	interacts with	VANGL2 (interacts with) WIF1
0.516	1840	0	0.526	0	49	0.062	0	0	interacts with	VANGL2 (interacts with) WNT7A	0	9606.ENSP00000357040	9606.ENSP00000285018	0	FALSE	interacts with	VANGL2 (interacts with) WNT7A
0.282	1842	0	0.297	0	49	0.06	0	0	interacts with	VANGL2 (interacts with) WNT9A	0	9606.ENSP00000357040	9606.ENSP00000272164	0	FALSE	interacts with	VANGL2 (interacts with) WNT9A
0.321	1844	0	0.336	0	49	0.062	0	0	interacts with	VANGL2 (interacts with) WNT2	0	9606.ENSP00000357040	9606.ENSP00000265441	0	FALSE	interacts with	VANGL2 (interacts with) WNT2
0.224	1846	0.042	0.24	0	50.5789	0.06	0	0	interacts with	VANGL2 (interacts with) WNT10A	0	9606.ENSP00000357040	9606.ENSP00000258411	0	FALSE	interacts with	VANGL2 (interacts with) WNT10A
0.347	1848	0	0.361	0	50.4286	0.062	0	0	interacts with	VANGL2 (interacts with) WNT6	0	9606.ENSP00000357040	9606.ENSP00000233948	0	FALSE	interacts with	VANGL2 (interacts with) WNT6
0.237	1850	0	0.254	0	49	0.062	0	0	interacts with	VANGL2 (interacts with) WNT3	0	9606.ENSP00000357040	9606.ENSP00000225512	0	FALSE	interacts with	VANGL2 (interacts with) WNT3
0.299	1852	0	0.314	0	50.5789	0.062	0	0	interacts with	VANGL2 (interacts with) WNT16	0	9606.ENSP00000357040	9606.ENSP00000222462	0	FALSE	interacts with	VANGL2 (interacts with) WNT16
0.63	1854	0	0.963	0.9	49.7857	0.091	0	0	interacts with	FZD5 (interacts with) RYK	0	9606.ENSP00000354607	9606.ENSP00000478721	0	FALSE	interacts with	FZD5 (interacts with) RYK
0.656	1856	0	0.947	0.65	49.3043	0.602	0	0	interacts with	FZD5 (interacts with) WNT8A	0	9606.ENSP00000354607	9606.ENSP00000426653	0	FALSE	interacts with	FZD5 (interacts with) WNT8A
0.799	1858	0	0.941	0.65	49.4286	0.234	0	0	interacts with	FZD5 (interacts with) WNT5B	0	9606.ENSP00000354607	9606.ENSP00000380379	0	FALSE	interacts with	FZD5 (interacts with) WNT5B
0.471	1862	0	0.821	0.65	50.0833	0.113	0	0	interacts with	FZD5 (interacts with) ROR2	0	9606.ENSP00000354607	9606.ENSP00000364860	0	FALSE	interacts with	FZD5 (interacts with) ROR2
0.145	1864	0.06	0.694	0.65	49.6667	0	0	0.721	interacts with	FZD5 (interacts with) SFRP4	0	9606.ENSP00000354607	9606.ENSP00000410715	0	FALSE	interacts with	FZD5 (interacts with) SFRP4
0.394	1866	0.044	0.69	0.5	48	0	0	0.967	interacts with	FZD5 (interacts with) FZD8	0	9606.ENSP00000354607	9606.ENSP00000363826	0.056	FALSE	interacts with	FZD5 (interacts with) FZD8
0.455	1868	0.048	0.533	0	49.4706	0.172	0	0	interacts with	FZD5 (interacts with) VANGL2	0	9606.ENSP00000354607	9606.ENSP00000357040	0	FALSE	interacts with	FZD5 (interacts with) VANGL2
0.316	1870	0	0.316	0	50	0	0	0	interacts with	FZD5 (interacts with) NOTUM	0	9606.ENSP00000354607	9606.ENSP00000387310	0	FALSE	interacts with	FZD5 (interacts with) NOTUM
0.195	1872	0	0.253	0	54.0179	0.11	0	0	interacts with	FZD5 (interacts with) MUSK	0	9606.ENSP00000354607	9606.ENSP00000363571	0	FALSE	interacts with	FZD5 (interacts with) MUSK
0.148	1874	0.081	0.204	0	78.8155	0.065	0	0	interacts with	FZD5 (interacts with) GPC3	0	9606.ENSP00000354607	9606.ENSP00000377836	0	FALSE	interacts with	FZD5 (interacts with) GPC3
0.476	1876	0	0.726	0.5	99.5714	0	0	0.849	interacts with	FZD5 (interacts with) FZD6	0	9606.ENSP00000354607	9606.ENSP00000351605	0	FALSE	interacts with	FZD5 (interacts with) FZD6
0.376	1878	0	0.376	0	50.9678	0	0	0	interacts with	FZD5 (interacts with) WLS	0	9606.ENSP00000354607	9606.ENSP00000346829	0	FALSE	interacts with	FZD5 (interacts with) WLS
0.458	1880	0.042	0.471	0	77.25	0	0	0.906	interacts with	FZD5 (interacts with) FZD9	0	9606.ENSP00000354607	9606.ENSP00000345785	0.063	FALSE	interacts with	FZD5 (interacts with) FZD9
0.795	1882	0	0.94	0.65	48	0.234	0	0	interacts with	FZD5 (interacts with) WNT7B	0	9606.ENSP00000354607	9606.ENSP00000341032	0	FALSE	interacts with	FZD5 (interacts with) WNT7B
0.505	1884	0	0.855	0.65	49.3043	0.234	0	0	interacts with	FZD5 (interacts with) WNT8B	0	9606.ENSP00000354607	9606.ENSP00000340677	0	FALSE	interacts with	FZD5 (interacts with) WNT8B
0.758	1886	0	0.979	0.9	49.5789	0.234	0	0	interacts with	FZD5 (interacts with) WNT11	0	9606.ENSP00000354607	9606.ENSP00000325526	0	FALSE	interacts with	FZD5 (interacts with) WNT11
0.484	1888	0	0.484	0	51.7857	0	0	0	interacts with	FZD5 (interacts with) PORCN	0	9606.ENSP00000354607	9606.ENSP00000322304	0	FALSE	interacts with	FZD5 (interacts with) PORCN
0.695	1890	0	0.904	0.65	49.5789	0.173	0	0	interacts with	FZD5 (interacts with) WNT10B	0	9606.ENSP00000354607	9606.ENSP00000301061	0	FALSE	interacts with	FZD5 (interacts with) WNT10B
0.241	1892	0	0.256	0	51.9231	0.06	0	0	interacts with	FZD5 (interacts with) NKD2	0	9606.ENSP00000354607	9606.ENSP00000296849	0	FALSE	interacts with	FZD5 (interacts with) NKD2
0.771	1894	0.049	0.955	0.8	48	0.093	0	0	interacts with	FZD5 (interacts with) LRP5	0	9606.ENSP00000354607	9606.ENSP00000294304	0	FALSE	interacts with	FZD5 (interacts with) LRP5
0.686	1896	0	0.901	0.65	48	0.173	0	0	interacts with	FZD5 (interacts with) WNT9B	0	9606.ENSP00000354607	9606.ENSP00000290015	0	FALSE	interacts with	FZD5 (interacts with) WNT9B
0.421	1898	0.046	0.439	0	49.5789	0.067	0	0	interacts with	FZD5 (interacts with) WIF1	0	9606.ENSP00000354607	9606.ENSP00000286574	0	FALSE	interacts with	FZD5 (interacts with) WIF1
0.392	1900	0.092	0.704	0.5	48	0	0	0.928	interacts with	FZD5 (interacts with) FZD7	0	9606.ENSP00000354607	9606.ENSP00000286201	0.055	FALSE	interacts with	FZD5 (interacts with) FZD7
0.981	1902	0	0.994	0.65	48	0.234	0	0	interacts with	FZD5 (interacts with) WNT7A	0	9606.ENSP00000354607	9606.ENSP00000285018	0	FALSE	interacts with	FZD5 (interacts with) WNT7A
0.454	1904	0.091	0.811	0.65	49.6667	0	0	0.693	interacts with	FZD5 (interacts with) SFRP2	0	9606.ENSP00000354607	9606.ENSP00000274063	0	FALSE	interacts with	FZD5 (interacts with) SFRP2
0.49	1906	0	0.839	0.65	48	0.173	0	0	interacts with	FZD5 (interacts with) WNT9A	0	9606.ENSP00000354607	9606.ENSP00000272164	0	FALSE	interacts with	FZD5 (interacts with) WNT9A
0.325	1908	0.068	0.357	0	48	0.06	0	0	interacts with	FZD5 (interacts with) NKD1	0	9606.ENSP00000354607	9606.ENSP00000268459	0	FALSE	interacts with	FZD5 (interacts with) NKD1
0.164	1910	0.057	0.7	0.65	51.3272	0	0	0.677	interacts with	FZD5 (interacts with) SFRP5	0	9606.ENSP00000354607	9606.ENSP00000266066	0	FALSE	interacts with	FZD5 (interacts with) SFRP5
0.746	1912	0	0.926	0.65	48	0.234	0	0	interacts with	FZD5 (interacts with) WNT2	0	9606.ENSP00000354607	9606.ENSP00000265441	0	FALSE	interacts with	FZD5 (interacts with) WNT2
0.839	1914	0.044	0.976	0.8	48	0.33	0	0	interacts with	FZD5 (interacts with) LRP6	0	9606.ENSP00000354607	9606.ENSP00000261349	0	FALSE	interacts with	FZD5 (interacts with) LRP6
0.689	1916	0	0.902	0.65	49.5789	0.173	0	0	interacts with	FZD5 (interacts with) WNT10A	0	9606.ENSP00000354607	9606.ENSP00000258411	0	FALSE	interacts with	FZD5 (interacts with) WNT10A
0.747	1918	0	0.926	0.65	49.4286	0.234	0	0	interacts with	FZD5 (interacts with) WNT6	0	9606.ENSP00000354607	9606.ENSP00000233948	0	FALSE	interacts with	FZD5 (interacts with) WNT6
0.717	1920	0	0.917	0.65	48	0.234	0	0	interacts with	FZD5 (interacts with) WNT3	0	9606.ENSP00000354607	9606.ENSP00000225512	0	FALSE	interacts with	FZD5 (interacts with) WNT3
0.669	1922	0	0.903	0.65	49.5789	0.234	0	0	interacts with	FZD5 (interacts with) WNT16	0	9606.ENSP00000354607	9606.ENSP00000222462	0	FALSE	interacts with	FZD5 (interacts with) WNT16
0.237	1924	0.064	0.728	0.65	48	0	0	0.646	interacts with	FZD5 (interacts with) SFRP1	0	9606.ENSP00000354607	9606.ENSP00000220772	0	FALSE	interacts with	FZD5 (interacts with) SFRP1
0.965	1926	0.055	0.97	0	47	0.172	0	0	interacts with	FZD6 (interacts with) VANGL2	0	9606.ENSP00000351605	9606.ENSP00000357040	0	FALSE	interacts with	FZD6 (interacts with) VANGL2
0.893	1928	0	0.968	0.65	48.4286	0.221	0	0	interacts with	FZD6 (interacts with) WNT5B	0	9606.ENSP00000351605	9606.ENSP00000380379	0	FALSE	interacts with	FZD6 (interacts with) WNT5B
0.568	1930	0.082	0.959	0.9	47	0.091	0	0	interacts with	FZD6 (interacts with) RYK	0	9606.ENSP00000351605	9606.ENSP00000478721	0	FALSE	interacts with	FZD6 (interacts with) RYK
0.411	1934	0	0.825	0.65	48.3043	0.221	0	0	interacts with	FZD6 (interacts with) WNT8A	0	9606.ENSP00000351605	9606.ENSP00000426653	0	FALSE	interacts with	FZD6 (interacts with) WNT8A
0.385	1936	0	0.792	0.65	47	0.113	0	0	interacts with	FZD6 (interacts with) ROR2	0	9606.ENSP00000351605	9606.ENSP00000364860	0	FALSE	interacts with	FZD6 (interacts with) ROR2
0.172	1938	0	0.698	0.65	48.6667	0	0	0.626	interacts with	FZD6 (interacts with) SFRP4	0	9606.ENSP00000351605	9606.ENSP00000410715	0	FALSE	interacts with	FZD6 (interacts with) SFRP4
0.188	1940	0.06	0.585	0.5	70.5	0	0	0.783	interacts with	FZD6 (interacts with) FZD8	0	9606.ENSP00000351605	9606.ENSP00000363826	0	FALSE	interacts with	FZD6 (interacts with) FZD8
0.255	1942	0	0.255	0	49	0	0	0	interacts with	FZD6 (interacts with) NOTUM	0	9606.ENSP00000351605	9606.ENSP00000387310	0	FALSE	interacts with	FZD6 (interacts with) NOTUM
0.146	1944	0	0.208	0	50.5179	0.11	0	0	interacts with	FZD6 (interacts with) MUSK	0	9606.ENSP00000351605	9606.ENSP00000363571	0	FALSE	interacts with	FZD6 (interacts with) MUSK
0.116	1946	0.052	0.173	0	130.167	0.093	0	0	interacts with	FZD6 (interacts with) LRP5L	0	9606.ENSP00000351605	9606.ENSP00000482378	0	FALSE	interacts with	FZD6 (interacts with) LRP5L
0.348	1948	0.063	0.363	0	48.5789	0	0	0	interacts with	FZD6 (interacts with) WLS	0	9606.ENSP00000351605	9606.ENSP00000346829	0	FALSE	interacts with	FZD6 (interacts with) WLS
0.455	1950	0	0.455	0	76.25	0	0	0.844	interacts with	FZD6 (interacts with) FZD9	0	9606.ENSP00000351605	9606.ENSP00000345785	0	FALSE	interacts with	FZD6 (interacts with) FZD9
0.797	1952	0	0.939	0.65	47	0.221	0	0	interacts with	FZD6 (interacts with) WNT7B	0	9606.ENSP00000351605	9606.ENSP00000341032	0	FALSE	interacts with	FZD6 (interacts with) WNT7B
0.462	1954	0	0.84	0.65	48.3043	0.221	0	0	interacts with	FZD6 (interacts with) WNT8B	0	9606.ENSP00000351605	9606.ENSP00000340677	0	FALSE	interacts with	FZD6 (interacts with) WNT8B
0.985	1956	0	0.998	0.9	48.5789	0.221	0	0	interacts with	FZD6 (interacts with) WNT11	0	9606.ENSP00000351605	9606.ENSP00000325526	0	FALSE	interacts with	FZD6 (interacts with) WNT11
0.614	1958	0.061	0.622	0	49	0	0	0	interacts with	FZD6 (interacts with) PORCN	0	9606.ENSP00000351605	9606.ENSP00000322304	0	FALSE	interacts with	FZD6 (interacts with) PORCN
0.496	1960	0	0.841	0.65	48.5789	0.173	0	0	interacts with	FZD6 (interacts with) WNT10B	0	9606.ENSP00000351605	9606.ENSP00000301061	0	FALSE	interacts with	FZD6 (interacts with) WNT10B
0.275	1962	0	0.289	0	49	0.06	0	0	interacts with	FZD6 (interacts with) NKD2	0	9606.ENSP00000351605	9606.ENSP00000296849	0	FALSE	interacts with	FZD6 (interacts with) NKD2
0.748	1964	0.084	0.952	0.8	47	0.093	0	0	interacts with	FZD6 (interacts with) LRP5	0	9606.ENSP00000351605	9606.ENSP00000294304	0	FALSE	interacts with	FZD6 (interacts with) LRP5
0.587	1966	0	0.87	0.65	47	0.173	0	0	interacts with	FZD6 (interacts with) WNT9B	0	9606.ENSP00000351605	9606.ENSP00000290015	0	FALSE	interacts with	FZD6 (interacts with) WNT9B
0.424	1968	0	0.439	0	48.5789	0.067	0	0	interacts with	FZD6 (interacts with) WIF1	0	9606.ENSP00000351605	9606.ENSP00000286574	0	FALSE	interacts with	FZD6 (interacts with) WIF1
0.105	1970	0.056	0.554	0.5	70.5	0	0	0.906	interacts with	FZD6 (interacts with) FZD7	0	9606.ENSP00000351605	9606.ENSP00000286201	0.069	FALSE	interacts with	FZD6 (interacts with) FZD7
0.882	1972	0.043	0.965	0.65	47	0.221	0	0	interacts with	FZD6 (interacts with) WNT7A	0	9606.ENSP00000351605	9606.ENSP00000285018	0	FALSE	interacts with	FZD6 (interacts with) WNT7A
0.189	1974	0	0.704	0.65	48.6667	0	0	0.635	interacts with	FZD6 (interacts with) SFRP2	0	9606.ENSP00000351605	9606.ENSP00000274063	0	FALSE	interacts with	FZD6 (interacts with) SFRP2
0.544	1976	0	0.856	0.65	47	0.173	0	0	interacts with	FZD6 (interacts with) WNT9A	0	9606.ENSP00000351605	9606.ENSP00000272164	0	FALSE	interacts with	FZD6 (interacts with) WNT9A
0.383	1978	0	0.396	0	47	0.06	0	0	interacts with	FZD6 (interacts with) NKD1	0	9606.ENSP00000351605	9606.ENSP00000268459	0	FALSE	interacts with	FZD6 (interacts with) NKD1
0.128	1980	0	0.683	0.65	48.7647	0.045	0	0.617	interacts with	FZD6 (interacts with) SFRP5	0	9606.ENSP00000351605	9606.ENSP00000266066	0	FALSE	interacts with	FZD6 (interacts with) SFRP5
0.707	1982	0	0.913	0.65	47	0.221	0	0	interacts with	FZD6 (interacts with) WNT2	0	9606.ENSP00000351605	9606.ENSP00000265441	0	FALSE	interacts with	FZD6 (interacts with) WNT2
0.79	1984	0.072	0.959	0.8	47	0.093	0	0	interacts with	FZD6 (interacts with) LRP6	0	9606.ENSP00000351605	9606.ENSP00000261349	0	FALSE	interacts with	FZD6 (interacts with) LRP6
0.688	1986	0	0.902	0.65	48.5789	0.173	0	0	interacts with	FZD6 (interacts with) WNT10A	0	9606.ENSP00000351605	9606.ENSP00000258411	0	FALSE	interacts with	FZD6 (interacts with) WNT10A
0.696	1988	0	0.91	0.65	48.4286	0.221	0	0	interacts with	FZD6 (interacts with) WNT6	0	9606.ENSP00000351605	9606.ENSP00000233948	0	FALSE	interacts with	FZD6 (interacts with) WNT6
0.697	1990	0	0.91	0.65	47	0.221	0	0	interacts with	FZD6 (interacts with) WNT3	0	9606.ENSP00000351605	9606.ENSP00000225512	0	FALSE	interacts with	FZD6 (interacts with) WNT3
0.781	1992	0	0.935	0.65	48.5789	0.221	0	0	interacts with	FZD6 (interacts with) WNT16	0	9606.ENSP00000351605	9606.ENSP00000222462	0	FALSE	interacts with	FZD6 (interacts with) WNT16
0.534	1994	0.045	0.875	0.65	47	0.295	0	0.624	interacts with	FZD6 (interacts with) SFRP1	0	9606.ENSP00000351605	9606.ENSP00000220772	0	FALSE	interacts with	FZD6 (interacts with) SFRP1
0.565	1996	0	0.957	0.9	47.7857	0.091	0	0	interacts with	FZD9 (interacts with) RYK	0	9606.ENSP00000345785	9606.ENSP00000478721	0	FALSE	interacts with	FZD9 (interacts with) RYK
0.846	1998	0	0.955	0.65	47.4286	0.234	0	0	interacts with	FZD9 (interacts with) WNT5B	0	9606.ENSP00000345785	9606.ENSP00000380379	0	FALSE	interacts with	FZD9 (interacts with) WNT5B
0.64	2002	0	0.895	0.65	47.3043	0.234	0	0	interacts with	FZD9 (interacts with) WNT8A	0	9606.ENSP00000345785	9606.ENSP00000426653	0	FALSE	interacts with	FZD9 (interacts with) WNT8A
0.847	2004	0.051	0.869	0	47.4706	0.172	0	0	interacts with	FZD9 (interacts with) VANGL2	0	9606.ENSP00000345785	9606.ENSP00000357040	0	FALSE	interacts with	FZD9 (interacts with) VANGL2
0.372	2006	0.085	0.797	0.65	48.0833	0.113	0	0	interacts with	FZD9 (interacts with) ROR2	0	9606.ENSP00000345785	9606.ENSP00000364860	0	FALSE	interacts with	FZD9 (interacts with) ROR2
0.147	2008	0	0.689	0.65	47.6667	0	0	0.701	interacts with	FZD9 (interacts with) SFRP4	0	9606.ENSP00000345785	9606.ENSP00000410715	0	FALSE	interacts with	FZD9 (interacts with) SFRP4
0.355	2010	0.08	0.381	0	48	0	0	0	interacts with	FZD9 (interacts with) NOTUM	0	9606.ENSP00000345785	9606.ENSP00000387310	0	FALSE	interacts with	FZD9 (interacts with) NOTUM
0.36	2012	0	0.36	0	48.9678	0	0	0	interacts with	FZD9 (interacts with) WLS	0	9606.ENSP00000345785	9606.ENSP00000346829	0	FALSE	interacts with	FZD9 (interacts with) WLS
0.172	2014	0	0.231	0	52.0179	0.11	0	0	interacts with	FZD9 (interacts with) MUSK	0	9606.ENSP00000345785	9606.ENSP00000363571	0	FALSE	interacts with	FZD9 (interacts with) MUSK
0.832	2016	0	0.951	0.65	46	0.234	0	0	interacts with	FZD9 (interacts with) WNT7B	0	9606.ENSP00000345785	9606.ENSP00000341032	0	FALSE	interacts with	FZD9 (interacts with) WNT7B
0.531	2018	0.049	0.864	0.65	47.3043	0.234	0	0	interacts with	FZD9 (interacts with) WNT8B	0	9606.ENSP00000345785	9606.ENSP00000340677	0	FALSE	interacts with	FZD9 (interacts with) WNT8B
0.951	2020	0.08	0.996	0.9	47.5789	0.234	0	0	interacts with	FZD9 (interacts with) WNT11	0	9606.ENSP00000345785	9606.ENSP00000325526	0.218	FALSE	interacts with	FZD9 (interacts with) WNT11
0.37	2022	0	0.37	0	49.7857	0	0	0	interacts with	FZD9 (interacts with) PORCN	0	9606.ENSP00000345785	9606.ENSP00000322304	0	FALSE	interacts with	FZD9 (interacts with) PORCN
0.522	2024	0.067	0.853	0.65	47.5789	0.173	0	0	interacts with	FZD9 (interacts with) WNT10B	0	9606.ENSP00000345785	9606.ENSP00000301061	0	FALSE	interacts with	FZD9 (interacts with) WNT10B
0.319	2026	0.072	0.354	0	49.9231	0.06	0	0	interacts with	FZD9 (interacts with) NKD2	0	9606.ENSP00000345785	9606.ENSP00000296849	0	FALSE	interacts with	FZD9 (interacts with) NKD2
0.605	2028	0.074	0.924	0.8	46	0.093	0	0	interacts with	FZD9 (interacts with) LRP5	0	9606.ENSP00000345785	9606.ENSP00000294304	0	FALSE	interacts with	FZD9 (interacts with) LRP5
0.455	2030	0	0.828	0.65	46	0.173	0	0	interacts with	FZD9 (interacts with) WNT9B	0	9606.ENSP00000345785	9606.ENSP00000290015	0	FALSE	interacts with	FZD9 (interacts with) WNT9B
0.518	2032	0.046	0.533	0	47.5789	0.067	0	0	interacts with	FZD9 (interacts with) WIF1	0	9606.ENSP00000345785	9606.ENSP00000286574	0	FALSE	interacts with	FZD9 (interacts with) WIF1
0.955	2034	0.042	0.987	0.65	46	0.234	0	0	interacts with	FZD9 (interacts with) WNT7A	0	9606.ENSP00000345785	9606.ENSP00000285018	0	FALSE	interacts with	FZD9 (interacts with) WNT7A
0.161	2036	0	0.693	0.65	47.6667	0	0	0.706	interacts with	FZD9 (interacts with) SFRP2	0	9606.ENSP00000345785	9606.ENSP00000274063	0	FALSE	interacts with	FZD9 (interacts with) SFRP2
0.576	2038	0	0.866	0.65	46	0.173	0	0	interacts with	FZD9 (interacts with) WNT9A	0	9606.ENSP00000345785	9606.ENSP00000272164	0	FALSE	interacts with	FZD9 (interacts with) WNT9A
0.433	2040	0.05	0.449	0	46	0.06	0	0	interacts with	FZD9 (interacts with) NKD1	0	9606.ENSP00000345785	9606.ENSP00000268459	0	FALSE	interacts with	FZD9 (interacts with) NKD1
0.154	2042	0.049	0.694	0.65	49.3272	0	0	0.683	interacts with	FZD9 (interacts with) SFRP5	0	9606.ENSP00000345785	9606.ENSP00000266066	0	FALSE	interacts with	FZD9 (interacts with) SFRP5
0.896	2044	0	0.969	0.65	46	0.234	0	0	interacts with	FZD9 (interacts with) WNT2	0	9606.ENSP00000345785	9606.ENSP00000265441	0	FALSE	interacts with	FZD9 (interacts with) WNT2
0.596	2046	0.042	0.92	0.8	46	0.093	0	0	interacts with	FZD9 (interacts with) LRP6	0	9606.ENSP00000345785	9606.ENSP00000261349	0	FALSE	interacts with	FZD9 (interacts with) LRP6
0.677	2048	0	0.898	0.65	47.5789	0.173	0	0	interacts with	FZD9 (interacts with) WNT10A	0	9606.ENSP00000345785	9606.ENSP00000258411	0	FALSE	interacts with	FZD9 (interacts with) WNT10A
0.787	2050	0.086	0.94	0.65	47.4286	0.234	0	0	interacts with	FZD9 (interacts with) WNT6	0	9606.ENSP00000345785	9606.ENSP00000233948	0	FALSE	interacts with	FZD9 (interacts with) WNT6
0.567	2052	0.047	0.874	0.65	46	0.234	0	0	interacts with	FZD9 (interacts with) WNT3	0	9606.ENSP00000345785	9606.ENSP00000225512	0	FALSE	interacts with	FZD9 (interacts with) WNT3
0.531	2054	0	0.863	0.65	47.5789	0.234	0	0	interacts with	FZD9 (interacts with) WNT16	0	9606.ENSP00000345785	9606.ENSP00000222462	0	FALSE	interacts with	FZD9 (interacts with) WNT16
0.235	2056	0.062	0.726	0.65	46	0	0	0.663	interacts with	FZD9 (interacts with) SFRP1	0	9606.ENSP00000345785	9606.ENSP00000220772	0	FALSE	interacts with	FZD9 (interacts with) SFRP1
0.131	2058	0	0.561	0.5	46.3043	0	0	0.856	interacts with	WNT7B (interacts with) WNT8A	0	9606.ENSP00000341032	9606.ENSP00000426653	0.071	FALSE	interacts with	WNT7B (interacts with) WNT8A
0.414	2060	0.061	0.7	0.5	46.3043	0	0	0.878	interacts with	WNT7B (interacts with) WNT8B	0	9606.ENSP00000341032	9606.ENSP00000340677	0	FALSE	interacts with	WNT7B (interacts with) WNT8B
0.153	2062	0.055	0.582	0.5	47	0.08	0	0.854	interacts with	WNT7B (interacts with) WNT9B	0	9606.ENSP00000341032	9606.ENSP00000290015	0	FALSE	interacts with	WNT7B (interacts with) WNT9B
0.149	2064	0.073	0.588	0.5	47	0.08	0	0.852	interacts with	WNT7B (interacts with) WNT9A	0	9606.ENSP00000341032	9606.ENSP00000272164	0	FALSE	interacts with	WNT7B (interacts with) WNT9A
0.813	2066	0.087	0.985	0.9	45.5789	0.234	0	0	interacts with	FZD2 (interacts with) WNT11	0	9606.ENSP00000323901	9606.ENSP00000325526	0	FALSE	interacts with	FZD2 (interacts with) WNT11
0.851	2068	0.092	0.966	0.65	45.4286	0.234	0	0	interacts with	FZD2 (interacts with) WNT5B	0	9606.ENSP00000323901	9606.ENSP00000380379	0.216	FALSE	interacts with	FZD2 (interacts with) WNT5B
0.632	2070	0	0.963	0.9	45.7857	0.091	0	0	interacts with	FZD2 (interacts with) RYK	0	9606.ENSP00000323901	9606.ENSP00000478721	0	FALSE	interacts with	FZD2 (interacts with) RYK
0.836	2072	0.043	0.96	0.65	44	0.234	0	0	interacts with	FZD2 (interacts with) WNT7B	0	9606.ENSP00000323901	9606.ENSP00000341032	0.204	FALSE	interacts with	FZD2 (interacts with) WNT7B
0.712	2074	0	0.916	0.65	45.3043	0.234	0	0	interacts with	FZD2 (interacts with) WNT8B	0	9606.ENSP00000323901	9606.ENSP00000340677	0	FALSE	interacts with	FZD2 (interacts with) WNT8B
0.475	2078	0	0.847	0.65	45.3043	0.234	0	0	interacts with	FZD2 (interacts with) WNT8A	0	9606.ENSP00000323901	9606.ENSP00000426653	0	FALSE	interacts with	FZD2 (interacts with) WNT8A
0.516	2080	0.102	0.847	0.65	46.0833	0.113	0	0	interacts with	FZD2 (interacts with) ROR2	0	9606.ENSP00000323901	9606.ENSP00000364860	0	FALSE	interacts with	FZD2 (interacts with) ROR2
0.726	2082	0.048	0.765	0	45.4706	0.172	0	0	interacts with	FZD2 (interacts with) VANGL2	0	9606.ENSP00000323901	9606.ENSP00000357040	0	FALSE	interacts with	FZD2 (interacts with) VANGL2
0.31	2084	0	0.748	0.65	45.6667	0	0	0.69	interacts with	FZD2 (interacts with) SFRP4	0	9606.ENSP00000323901	9606.ENSP00000410715	0	FALSE	interacts with	FZD2 (interacts with) SFRP4
0.397	2086	0.087	0.705	0.5	55	0	0	0.933	interacts with	FZD2 (interacts with) FZD5	0	9606.ENSP00000323901	9606.ENSP00000354607	0.057	FALSE	interacts with	FZD2 (interacts with) FZD5
0.367	2088	0.126	0.704	0.5	55	0	0	0.927	interacts with	FZD2 (interacts with) FZD8	0	9606.ENSP00000323901	9606.ENSP00000363826	0.057	FALSE	interacts with	FZD2 (interacts with) FZD8
0.122	2090	0	0.552	0.5	55	0	0	0.915	interacts with	FZD2 (interacts with) FZD4	0	9606.ENSP00000323901	9606.ENSP00000434034	0.06	FALSE	interacts with	FZD2 (interacts with) FZD4
0.103	2092	0	0.542	0.5	58.5714	0	0	0.908	interacts with	FZD2 (interacts with) FZD6	0	9606.ENSP00000323901	9606.ENSP00000351605	0.06	FALSE	interacts with	FZD2 (interacts with) FZD6
0.39	2094	0.062	0.403	0	46.9678	0	0	0	interacts with	FZD2 (interacts with) WLS	0	9606.ENSP00000323901	9606.ENSP00000346829	0	FALSE	interacts with	FZD2 (interacts with) WLS
0.401	2096	0	0.401	0	46	0	0	0	interacts with	FZD2 (interacts with) NOTUM	0	9606.ENSP00000323901	9606.ENSP00000387310	0	FALSE	interacts with	FZD2 (interacts with) NOTUM
0.218	2098	0	0.274	0	50.0179	0.11	0	0	interacts with	FZD2 (interacts with) MUSK	0	9606.ENSP00000323901	9606.ENSP00000363571	0	FALSE	interacts with	FZD2 (interacts with) MUSK
0.186	2100	0.049	0.213	0	66.5655	0.065	0	0	interacts with	FZD2 (interacts with) GPC3	0	9606.ENSP00000323901	9606.ENSP00000377836	0	FALSE	interacts with	FZD2 (interacts with) GPC3
0.102	2102	0	0.15	0	66.8333	0.093	0	0	interacts with	FZD2 (interacts with) LRP5L	0	9606.ENSP00000323901	9606.ENSP00000482378	0	FALSE	interacts with	FZD2 (interacts with) LRP5L
0.473	2104	0	0.473	0	47.7857	0	0	0	interacts with	FZD2 (interacts with) PORCN	0	9606.ENSP00000323901	9606.ENSP00000322304	0	FALSE	interacts with	FZD2 (interacts with) PORCN
0.585	2106	0	0.869	0.65	45.5789	0.173	0	0	interacts with	FZD2 (interacts with) WNT10B	0	9606.ENSP00000323901	9606.ENSP00000301061	0	FALSE	interacts with	FZD2 (interacts with) WNT10B
0.309	2108	0.049	0.328	0	47.9231	0.06	0	0	interacts with	FZD2 (interacts with) NKD2	0	9606.ENSP00000323901	9606.ENSP00000296849	0	FALSE	interacts with	FZD2 (interacts with) NKD2
0.782	2110	0.083	0.959	0.8	44	0.093	0	0	interacts with	FZD2 (interacts with) LRP5	0	9606.ENSP00000323901	9606.ENSP00000294304	0	FALSE	interacts with	FZD2 (interacts with) LRP5
0.493	2112	0	0.84	0.65	44	0.173	0	0	interacts with	FZD2 (interacts with) WNT9B	0	9606.ENSP00000323901	9606.ENSP00000290015	0	FALSE	interacts with	FZD2 (interacts with) WNT9B
0.47	2114	0.066	0.685	0.4	45.5789	0.067	0	0	interacts with	FZD2 (interacts with) WIF1	0	9606.ENSP00000323901	9606.ENSP00000286574	0	FALSE	interacts with	FZD2 (interacts with) WIF1
0.453	2116	0.087	0.787	0.5	44	0.24	0	0.978	interacts with	FZD2 (interacts with) FZD7	0	9606.ENSP00000323901	9606.ENSP00000286201	0.051	FALSE	interacts with	FZD2 (interacts with) FZD7
0.802	2118	0	0.942	0.65	44	0.234	0	0	interacts with	FZD2 (interacts with) WNT7A	0	9606.ENSP00000323901	9606.ENSP00000285018	0	FALSE	interacts with	FZD2 (interacts with) WNT7A
0.335	2120	0.098	0.772	0.65	45.6667	0	0	0.68	interacts with	FZD2 (interacts with) SFRP2	0	9606.ENSP00000323901	9606.ENSP00000274063	0	FALSE	interacts with	FZD2 (interacts with) SFRP2
0.545	2122	0	0.856	0.65	44	0.173	0	0	interacts with	FZD2 (interacts with) WNT9A	0	9606.ENSP00000323901	9606.ENSP00000272164	0	FALSE	interacts with	FZD2 (interacts with) WNT9A
0.295	2124	0.048	0.314	0	44	0.06	0	0	interacts with	FZD2 (interacts with) NKD1	0	9606.ENSP00000323901	9606.ENSP00000268459	0	FALSE	interacts with	FZD2 (interacts with) NKD1
0.158	2126	0.053	0.696	0.65	47.3272	0	0	0.671	interacts with	FZD2 (interacts with) SFRP5	0	9606.ENSP00000323901	9606.ENSP00000266066	0	FALSE	interacts with	FZD2 (interacts with) SFRP5
0.833	2128	0.047	0.963	0.65	44	0.234	0	0	interacts with	FZD2 (interacts with) WNT2	0	9606.ENSP00000323901	9606.ENSP00000265441	0.268	FALSE	interacts with	FZD2 (interacts with) WNT2
0.751	2130	0	0.95	0.8	44	0.093	0	0	interacts with	FZD2 (interacts with) LRP6	0	9606.ENSP00000323901	9606.ENSP00000261349	0	FALSE	interacts with	FZD2 (interacts with) LRP6
0.566	2132	0	0.863	0.65	45.5789	0.173	0	0	interacts with	FZD2 (interacts with) WNT10A	0	9606.ENSP00000323901	9606.ENSP00000258411	0	FALSE	interacts with	FZD2 (interacts with) WNT10A
0.401	2134	0	0.693	0.5	49	0	0	0.913	interacts with	FZD2 (interacts with) FZD3	0	9606.ENSP00000323901	9606.ENSP00000240093	0.059	FALSE	interacts with	FZD2 (interacts with) FZD3
0.864	2136	0.044	0.96	0.65	45.4286	0.234	0	0	interacts with	FZD2 (interacts with) WNT6	0	9606.ENSP00000323901	9606.ENSP00000233948	0	FALSE	interacts with	FZD2 (interacts with) WNT6
0.553	2138	0.045	0.87	0.65	44	0.234	0	0	interacts with	FZD2 (interacts with) WNT3	0	9606.ENSP00000323901	9606.ENSP00000225512	0	FALSE	interacts with	FZD2 (interacts with) WNT3
0.669	2140	0	0.903	0.65	45.5789	0.234	0	0	interacts with	FZD2 (interacts with) WNT16	0	9606.ENSP00000323901	9606.ENSP00000222462	0	FALSE	interacts with	FZD2 (interacts with) WNT16
0.825	2142	0.081	0.938	0.65	44	0	0	0.668	interacts with	FZD2 (interacts with) SFRP1	0	9606.ENSP00000323901	9606.ENSP00000220772	0	FALSE	interacts with	FZD2 (interacts with) SFRP1
0.871	2144	0.074	0.993	0.9	43	0.529	0	0	interacts with	DVL3 (interacts with) VANGL2	0	9606.ENSP00000316054	9606.ENSP00000357040	0	FALSE	interacts with	DVL3 (interacts with) VANGL2
0.828	2146	0.059	0.946	0.65	48.375	0.169	0	0	interacts with	DVL3 (interacts with) FZD4	0	9606.ENSP00000316054	9606.ENSP00000434034	0	FALSE	interacts with	DVL3 (interacts with) FZD4
0.683	2148	0	0.926	0.65	48.375	0.386	0	0	interacts with	DVL3 (interacts with) FZD8	0	9606.ENSP00000316054	9606.ENSP00000363826	0	FALSE	interacts with	DVL3 (interacts with) FZD8
0.758	2150	0	0.923	0.65	43	0.165	0	0	interacts with	DVL3 (interacts with) FZD6	0	9606.ENSP00000316054	9606.ENSP00000351605	0	FALSE	interacts with	DVL3 (interacts with) FZD6
0.699	2152	0	0.905	0.65	48.375	0.169	0	0	interacts with	DVL3 (interacts with) FZD5	0	9606.ENSP00000316054	9606.ENSP00000354607	0	FALSE	interacts with	DVL3 (interacts with) FZD5
0.549	2154	0.052	0.859	0.65	43	0.169	0	0	interacts with	DVL3 (interacts with) FZD9	0	9606.ENSP00000316054	9606.ENSP00000345785	0	FALSE	interacts with	DVL3 (interacts with) FZD9
0.551	2156	0.042	0.858	0.65	48.375	0.169	0	0	interacts with	DVL3 (interacts with) FZD2	0	9606.ENSP00000316054	9606.ENSP00000323901	0	FALSE	interacts with	DVL3 (interacts with) FZD2
0.518	2158	0	0.772	0.5	44.5789	0.132	0	0	interacts with	DVL3 (interacts with) WNT11	0	9606.ENSP00000316054	9606.ENSP00000325526	0	FALSE	interacts with	DVL3 (interacts with) WNT11
0.419	2160	0.044	0.726	0.5	44.4286	0.132	0	0	interacts with	DVL3 (interacts with) WNT5B	0	9606.ENSP00000316054	9606.ENSP00000380379	0	FALSE	interacts with	DVL3 (interacts with) WNT5B
0.654	2162	0.042	0.687	0	43	0.132	0	0	interacts with	DVL3 (interacts with) WNT7B	0	9606.ENSP00000316054	9606.ENSP00000341032	0	FALSE	interacts with	DVL3 (interacts with) WNT7B
0.265	2164	0	0.653	0.5	44.3043	0.132	0	0	interacts with	DVL3 (interacts with) WNT8B	0	9606.ENSP00000316054	9606.ENSP00000340677	0	FALSE	interacts with	DVL3 (interacts with) WNT8B
0.255	2166	0	0.648	0.5	44.3043	0.132	0	0	interacts with	DVL3 (interacts with) WNT8A	0	9606.ENSP00000316054	9606.ENSP00000426653	0	FALSE	interacts with	DVL3 (interacts with) WNT8A
0.445	2168	0.074	0.492	0	43	0.091	0	0	interacts with	DVL3 (interacts with) RYK	0	9606.ENSP00000316054	9606.ENSP00000478721	0	FALSE	interacts with	DVL3 (interacts with) RYK
0.345	2172	0.043	0.409	0	43	0.133	0	0	interacts with	DVL3 (interacts with) ROR2	0	9606.ENSP00000316054	9606.ENSP00000364860	0	FALSE	interacts with	DVL3 (interacts with) ROR2
0.36	2174	0.044	0.362	0	45	0	0	0	interacts with	DVL3 (interacts with) PORCN	0	9606.ENSP00000316054	9606.ENSP00000322304	0	FALSE	interacts with	DVL3 (interacts with) PORCN
0.28	2176	0	0.356	0	44.6667	0.143	0	0	interacts with	DVL3 (interacts with) SFRP4	0	9606.ENSP00000316054	9606.ENSP00000410715	0	FALSE	interacts with	DVL3 (interacts with) SFRP4
0.315	2178	0.042	0.316	0	44.5789	0	0	0	interacts with	DVL3 (interacts with) WLS	0	9606.ENSP00000316054	9606.ENSP00000346829	0	FALSE	interacts with	DVL3 (interacts with) WLS
0.241	2180	0	0.241	0	45	0	0	0	interacts with	DVL3 (interacts with) NOTUM	0	9606.ENSP00000316054	9606.ENSP00000387310	0	FALSE	interacts with	DVL3 (interacts with) NOTUM
0.116	2182	0.06	0.194	0	48.3333	0.108	0	0	interacts with	DVL3 (interacts with) LRP5L	0	9606.ENSP00000316054	9606.ENSP00000482378	0	FALSE	interacts with	DVL3 (interacts with) LRP5L
0.094	2184	0	0.181	0	46.5179	0.133	0	0	interacts with	DVL3 (interacts with) MUSK	0	9606.ENSP00000316054	9606.ENSP00000363571	0	FALSE	interacts with	DVL3 (interacts with) MUSK
0.367	2186	0	0.425	0	44.5789	0.129	0	0	interacts with	DVL3 (interacts with) WNT10B	0	9606.ENSP00000316054	9606.ENSP00000301061	0	FALSE	interacts with	DVL3 (interacts with) WNT10B
0.433	2188	0	0.958	0.9	45	0.332	0	0	interacts with	DVL3 (interacts with) NKD2	0	9606.ENSP00000316054	9606.ENSP00000296849	0	FALSE	interacts with	DVL3 (interacts with) NKD2
0.397	2190	0	0.461	0	58.375	0.143	0	0	interacts with	DVL3 (interacts with) FRZB	0	9606.ENSP00000316054	9606.ENSP00000295113	0	FALSE	interacts with	DVL3 (interacts with) FRZB
0.544	2192	0.083	0.852	0.65	43	0.108	0	0	interacts with	DVL3 (interacts with) LRP5	0	9606.ENSP00000316054	9606.ENSP00000294304	0	FALSE	interacts with	DVL3 (interacts with) LRP5
0.409	2194	0	0.463	0	43	0.129	0	0	interacts with	DVL3 (interacts with) WNT9B	0	9606.ENSP00000316054	9606.ENSP00000290015	0	FALSE	interacts with	DVL3 (interacts with) WNT9B
0.55	2196	0.049	0.859	0.65	48.375	0.169	0	0	interacts with	DVL3 (interacts with) FZD1	0	9606.ENSP00000316054	9606.ENSP00000287934	0	FALSE	interacts with	DVL3 (interacts with) FZD1
0.333	2198	0	0.333	0	44.5789	0	0	0	interacts with	DVL3 (interacts with) WIF1	0	9606.ENSP00000316054	9606.ENSP00000286574	0	FALSE	interacts with	DVL3 (interacts with) WIF1
0.879	2200	0.042	0.962	0.65	48.375	0.169	0	0	interacts with	DVL3 (interacts with) FZD7	0	9606.ENSP00000316054	9606.ENSP00000286201	0	FALSE	interacts with	DVL3 (interacts with) FZD7
0.441	2202	0.042	0.494	0	43	0.132	0	0	interacts with	DVL3 (interacts with) WNT7A	0	9606.ENSP00000316054	9606.ENSP00000285018	0	FALSE	interacts with	DVL3 (interacts with) WNT7A
0.342	2204	0	0.43	0	44.6667	0.169	0	0	interacts with	DVL3 (interacts with) SFRP2	0	9606.ENSP00000316054	9606.ENSP00000274063	0	FALSE	interacts with	DVL3 (interacts with) SFRP2
0.354	2206	0	0.413	0	43	0.129	0	0	interacts with	DVL3 (interacts with) WNT9A	0	9606.ENSP00000316054	9606.ENSP00000272164	0	FALSE	interacts with	DVL3 (interacts with) WNT9A
0.672	2208	0	0.977	0.9	43	0.357	0	0	interacts with	DVL3 (interacts with) NKD1	0	9606.ENSP00000316054	9606.ENSP00000268459	0	FALSE	interacts with	DVL3 (interacts with) NKD1
0.289	2210	0	0.384	0	44.7647	0.169	0	0	interacts with	DVL3 (interacts with) SFRP5	0	9606.ENSP00000316054	9606.ENSP00000266066	0	FALSE	interacts with	DVL3 (interacts with) SFRP5
0.347	2212	0	0.409	0	43	0.132	0	0	interacts with	DVL3 (interacts with) WNT2	0	9606.ENSP00000316054	9606.ENSP00000265441	0	FALSE	interacts with	DVL3 (interacts with) WNT2
0.748	2214	0.053	0.915	0.65	43	0.108	0	0	interacts with	DVL3 (interacts with) LRP6	0	9606.ENSP00000316054	9606.ENSP00000261349	0	FALSE	interacts with	DVL3 (interacts with) LRP6
0.323	2216	0	0.385	0	44.5789	0.129	0	0	interacts with	DVL3 (interacts with) WNT10A	0	9606.ENSP00000316054	9606.ENSP00000258411	0	FALSE	interacts with	DVL3 (interacts with) WNT10A
0.551	2218	0	0.858	0.65	43	0.169	0	0	interacts with	DVL3 (interacts with) FZD3	0	9606.ENSP00000316054	9606.ENSP00000240093	0	FALSE	interacts with	DVL3 (interacts with) FZD3
0.364	2220	0	0.425	0	44.4286	0.132	0	0	interacts with	DVL3 (interacts with) WNT6	0	9606.ENSP00000316054	9606.ENSP00000233948	0	FALSE	interacts with	DVL3 (interacts with) WNT6
0.385	2222	0.052	0.807	0.65	55.875	0.169	0	0	interacts with	DVL3 (interacts with) FZD10	0	9606.ENSP00000316054	9606.ENSP00000229030	0	FALSE	interacts with	DVL3 (interacts with) FZD10
0.487	2224	0	0.536	0	43	0.132	0	0	interacts with	DVL3 (interacts with) WNT3	0	9606.ENSP00000316054	9606.ENSP00000225512	0	FALSE	interacts with	DVL3 (interacts with) WNT3
0.346	2226	0	0.408	0	44.5789	0.132	0	0	interacts with	DVL3 (interacts with) WNT16	0	9606.ENSP00000316054	9606.ENSP00000222462	0	FALSE	interacts with	DVL3 (interacts with) WNT16
0.657	2228	0	0.702	0	43	0.169	0	0	interacts with	DVL3 (interacts with) SFRP1	0	9606.ENSP00000316054	9606.ENSP00000220772	0	FALSE	interacts with	DVL3 (interacts with) SFRP1
0.992	2230	0	0.997	0.65	43.5789	0.204	0	0	interacts with	LRP5 (interacts with) WNT10B	0	9606.ENSP00000294304	9606.ENSP00000301061	0	FALSE	interacts with	LRP5 (interacts with) WNT10B
0.943	2232	0.042	0.98	0.65	42	0.103	0	0	interacts with	LRP5 (interacts with) WNT7B	0	9606.ENSP00000294304	9606.ENSP00000341032	0	FALSE	interacts with	LRP5 (interacts with) WNT7B
0.84	2236	0.067	0.946	0.65	43.5789	0.095	0	0	interacts with	LRP5 (interacts with) WNT11	0	9606.ENSP00000294304	9606.ENSP00000325526	0	FALSE	interacts with	LRP5 (interacts with) WNT11
0.708	2238	0.055	0.901	0.65	43.3043	0.095	0	0	interacts with	LRP5 (interacts with) WNT8A	0	9606.ENSP00000294304	9606.ENSP00000426653	0	FALSE	interacts with	LRP5 (interacts with) WNT8A
0.637	2240	0	0.875	0.65	43.3043	0.095	0	0	interacts with	LRP5 (interacts with) WNT8B	0	9606.ENSP00000294304	9606.ENSP00000340677	0	FALSE	interacts with	LRP5 (interacts with) WNT8B
0.604	2242	0	0.863	0.65	43.4286	0.095	0	0	interacts with	LRP5 (interacts with) WNT5B	0	9606.ENSP00000294304	9606.ENSP00000380379	0	FALSE	interacts with	LRP5 (interacts with) WNT5B
0.862	2244	0.042	0.862	0	43.7857	0	0	0	interacts with	LRP5 (interacts with) RYK	0	9606.ENSP00000294304	9606.ENSP00000478721	0	FALSE	interacts with	LRP5 (interacts with) RYK
0.713	2246	0	0.724	0	48.1667	0.08	0	0	interacts with	LRP5 (interacts with) SFRP4	0	9606.ENSP00000294304	9606.ENSP00000410715	0	FALSE	interacts with	LRP5 (interacts with) SFRP4
0.692	2248	0	0.692	0	44.9678	0	0	0	interacts with	LRP5 (interacts with) WLS	0	9606.ENSP00000294304	9606.ENSP00000346829	0	FALSE	interacts with	LRP5 (interacts with) WLS
0.558	2250	0	0.558	0	54.7857	0	0	0	interacts with	LRP5 (interacts with) PORCN	0	9606.ENSP00000294304	9606.ENSP00000322304	0	FALSE	interacts with	LRP5 (interacts with) PORCN
0.514	2252	0.088	0.545	0	57.5833	0.057	0	0	interacts with	LRP5 (interacts with) ROR2	0	9606.ENSP00000294304	9606.ENSP00000364860	0	FALSE	interacts with	LRP5 (interacts with) ROR2
0.417	2254	0	0.417	0	43.4706	0	0	0	interacts with	LRP5 (interacts with) VANGL2	0	9606.ENSP00000294304	9606.ENSP00000357040	0	FALSE	interacts with	LRP5 (interacts with) VANGL2
0.384	2256	0.086	0.413	0	44	0	0	0	interacts with	LRP5 (interacts with) NOTUM	0	9606.ENSP00000294304	9606.ENSP00000387310	0	FALSE	interacts with	LRP5 (interacts with) NOTUM
0.311	2258	0.067	0.353	0	61.5179	0.075	0	0	interacts with	LRP5 (interacts with) MUSK	0	9606.ENSP00000294304	9606.ENSP00000363571	0	FALSE	interacts with	LRP5 (interacts with) MUSK
0.294	2260	0.086	0.33	0	59.4231	0.046	0	0	interacts with	LRP5 (interacts with) NKD2	0	9606.ENSP00000294304	9606.ENSP00000296849	0	FALSE	interacts with	LRP5 (interacts with) NKD2
0.695	2262	0	0.894	0.65	42	0.091	0	0	interacts with	LRP5 (interacts with) WNT9B	0	9606.ENSP00000294304	9606.ENSP00000290015	0	FALSE	interacts with	LRP5 (interacts with) WNT9B
0.775	2264	0.086	0.865	0.4	43.5789	0	0	0	interacts with	LRP5 (interacts with) WIF1	0	9606.ENSP00000294304	9606.ENSP00000286574	0	FALSE	interacts with	LRP5 (interacts with) WIF1
0.991	2266	0	0.996	0.65	42	0.103	0	0	interacts with	LRP5 (interacts with) WNT7A	0	9606.ENSP00000294304	9606.ENSP00000285018	0	FALSE	interacts with	LRP5 (interacts with) WNT7A
0.808	2268	0	0.886	0.4	43.6667	0.093	0	0	interacts with	LRP5 (interacts with) SFRP2	0	9606.ENSP00000294304	9606.ENSP00000274063	0	FALSE	interacts with	LRP5 (interacts with) SFRP2
0.694	2270	0.062	0.896	0.65	42	0.091	0	0	interacts with	LRP5 (interacts with) WNT9A	0	9606.ENSP00000294304	9606.ENSP00000272164	0	FALSE	interacts with	LRP5 (interacts with) WNT9A
0.419	2272	0.049	0.426	0	55.5	0.046	0	0	interacts with	LRP5 (interacts with) NKD1	0	9606.ENSP00000294304	9606.ENSP00000268459	0	FALSE	interacts with	LRP5 (interacts with) NKD1
0.659	2274	0	0.678	0	45.3272	0.093	0	0	interacts with	LRP5 (interacts with) SFRP5	0	9606.ENSP00000294304	9606.ENSP00000266066	0	FALSE	interacts with	LRP5 (interacts with) SFRP5
0.949	2276	0	0.982	0.65	42	0.095	0	0	interacts with	LRP5 (interacts with) WNT2	0	9606.ENSP00000294304	9606.ENSP00000265441	0	FALSE	interacts with	LRP5 (interacts with) WNT2
0.986	2278	0.081	0.999	0.9	42	0.354	0	0.974	interacts with	LRP5 (interacts with) LRP6	0	9606.ENSP00000294304	9606.ENSP00000261349	0.053	FALSE	interacts with	LRP5 (interacts with) LRP6
0.781	2280	0	0.931	0.65	43.5789	0.173	0	0	interacts with	LRP5 (interacts with) WNT10A	0	9606.ENSP00000294304	9606.ENSP00000258411	0	FALSE	interacts with	LRP5 (interacts with) WNT10A
0.814	2282	0.044	0.936	0.65	43.4286	0.095	0	0	interacts with	LRP5 (interacts with) WNT6	0	9606.ENSP00000294304	9606.ENSP00000233948	0	FALSE	interacts with	LRP5 (interacts with) WNT6
0.984	2284	0	0.995	0.72	42	0.095	0	0	interacts with	LRP5 (interacts with) WNT3	0	9606.ENSP00000294304	9606.ENSP00000225512	0	FALSE	interacts with	LRP5 (interacts with) WNT3
0.765	2286	0	0.919	0.65	43.5789	0.095	0	0	interacts with	LRP5 (interacts with) WNT16	0	9606.ENSP00000294304	9606.ENSP00000222462	0	FALSE	interacts with	LRP5 (interacts with) WNT16
0.847	2288	0.043	0.91	0.4	42	0.093	0	0	interacts with	LRP5 (interacts with) SFRP1	0	9606.ENSP00000294304	9606.ENSP00000220772	0	FALSE	interacts with	LRP5 (interacts with) SFRP1
0.993	2290	0.08	0.998	0.8	40	0.093	0	0	interacts with	FZD1 (interacts with) LRP5	0	9606.ENSP00000287934	9606.ENSP00000294304	0	FALSE	interacts with	FZD1 (interacts with) LRP5
0.774	2292	0.087	0.982	0.9	41.5789	0.234	0	0	interacts with	FZD1 (interacts with) WNT11	0	9606.ENSP00000287934	9606.ENSP00000325526	0	FALSE	interacts with	FZD1 (interacts with) WNT11
0.764	2294	0.049	0.976	0.9	40	0.091	0	0	interacts with	FZD1 (interacts with) RYK	0	9606.ENSP00000287934	9606.ENSP00000478721	0	FALSE	interacts with	FZD1 (interacts with) RYK
0.834	2296	0	0.951	0.65	40	0.234	0	0	interacts with	FZD1 (interacts with) WNT7B	0	9606.ENSP00000287934	9606.ENSP00000341032	0	FALSE	interacts with	FZD1 (interacts with) WNT7B
0.833	2298	0	0.947	0.65	41.5789	0.173	0	0	interacts with	FZD1 (interacts with) WNT10B	0	9606.ENSP00000287934	9606.ENSP00000301061	0	FALSE	interacts with	FZD1 (interacts with) WNT10B
0.599	2302	0.074	0.908	0.65	41.4286	0.234	0	0	interacts with	FZD1 (interacts with) WNT5B	0	9606.ENSP00000287934	9606.ENSP00000380379	0.221	FALSE	interacts with	FZD1 (interacts with) WNT5B
0.702	2304	0.094	0.905	0.65	40	0.113	0	0	interacts with	FZD1 (interacts with) ROR2	0	9606.ENSP00000287934	9606.ENSP00000364860	0	FALSE	interacts with	FZD1 (interacts with) ROR2
0.544	2306	0	0.867	0.65	41.3043	0.234	0	0	interacts with	FZD1 (interacts with) WNT8B	0	9606.ENSP00000287934	9606.ENSP00000340677	0	FALSE	interacts with	FZD1 (interacts with) WNT8B
0.507	2308	0	0.856	0.65	41.3043	0.234	0	0	interacts with	FZD1 (interacts with) WNT8A	0	9606.ENSP00000287934	9606.ENSP00000426653	0	FALSE	interacts with	FZD1 (interacts with) WNT8A
0.518	2310	0	0.848	0.65	40	0.173	0	0	interacts with	FZD1 (interacts with) WNT9B	0	9606.ENSP00000287934	9606.ENSP00000290015	0	FALSE	interacts with	FZD1 (interacts with) WNT9B
0.509	2312	0.062	0.824	0.65	41.6667	0	0	0.702	interacts with	FZD1 (interacts with) SFRP4	0	9606.ENSP00000287934	9606.ENSP00000410715	0	FALSE	interacts with	FZD1 (interacts with) SFRP4
0.449	2314	0.147	0.744	0.5	50	0	0	0.899	interacts with	FZD1 (interacts with) FZD8	0	9606.ENSP00000287934	9606.ENSP00000363826	0	FALSE	interacts with	FZD1 (interacts with) FZD8
0.395	2316	0.083	0.714	0.5	53.3333	0.082	0	0.978	interacts with	FZD1 (interacts with) FZD2	0	9606.ENSP00000287934	9606.ENSP00000323901	0.051	FALSE	interacts with	FZD1 (interacts with) FZD2
0.411	2318	0.089	0.708	0.5	50	0	0	0.923	interacts with	FZD1 (interacts with) FZD5	0	9606.ENSP00000287934	9606.ENSP00000354607	0	FALSE	interacts with	FZD1 (interacts with) FZD5
0.649	2320	0.048	0.699	0	40	0.172	0	0	interacts with	FZD1 (interacts with) VANGL2	0	9606.ENSP00000287934	9606.ENSP00000357040	0	FALSE	interacts with	FZD1 (interacts with) VANGL2
0.125	2322	0.062	0.568	0.5	63.3333	0	0	0.884	interacts with	FZD1 (interacts with) FZD6	0	9606.ENSP00000287934	9606.ENSP00000351605	0.073	FALSE	interacts with	FZD1 (interacts with) FZD6
0.127	2324	0.047	0.559	0.5	63.3333	0	0	0.911	interacts with	FZD1 (interacts with) FZD4	0	9606.ENSP00000287934	9606.ENSP00000434034	0.064	FALSE	interacts with	FZD1 (interacts with) FZD4
0.486	2326	0	0.486	0	42	0	0	0	interacts with	FZD1 (interacts with) PORCN	0	9606.ENSP00000287934	9606.ENSP00000322304	0	FALSE	interacts with	FZD1 (interacts with) PORCN
0.373	2328	0.086	0.403	0	41.5789	0	0	0	interacts with	FZD1 (interacts with) WLS	0	9606.ENSP00000287934	9606.ENSP00000346829	0	FALSE	interacts with	FZD1 (interacts with) WLS
0.374	2330	0	0.374	0	42	0	0	0	interacts with	FZD1 (interacts with) NOTUM	0	9606.ENSP00000287934	9606.ENSP00000387310	0	FALSE	interacts with	FZD1 (interacts with) NOTUM
0.319	2332	0	0.333	0	42	0.06	0	0	interacts with	FZD1 (interacts with) NKD2	0	9606.ENSP00000287934	9606.ENSP00000296849	0	FALSE	interacts with	FZD1 (interacts with) NKD2
0.245	2334	0	0.299	0	43.5179	0.11	0	0	interacts with	FZD1 (interacts with) MUSK	0	9606.ENSP00000287934	9606.ENSP00000363571	0	FALSE	interacts with	FZD1 (interacts with) MUSK
0.22	2336	0	0.24	0	58.994	0.065	0	0	interacts with	FZD1 (interacts with) GPC3	0	9606.ENSP00000287934	9606.ENSP00000377836	0	FALSE	interacts with	FZD1 (interacts with) GPC3
0.527	2338	0.066	0.72	0.4	41.5789	0.067	0	0	interacts with	FZD1 (interacts with) WIF1	0	9606.ENSP00000287934	9606.ENSP00000286574	0	FALSE	interacts with	FZD1 (interacts with) WIF1
0.422	2340	0.122	0.727	0.5	40	0	0	0.978	interacts with	FZD1 (interacts with) FZD7	0	9606.ENSP00000287934	9606.ENSP00000286201	0.051	FALSE	interacts with	FZD1 (interacts with) FZD7
0.769	2342	0	0.932	0.65	40	0.234	0	0	interacts with	FZD1 (interacts with) WNT7A	0	9606.ENSP00000287934	9606.ENSP00000285018	0	FALSE	interacts with	FZD1 (interacts with) WNT7A
0.218	2344	0.106	0.734	0.65	41.6667	0	0	0.692	interacts with	FZD1 (interacts with) SFRP2	0	9606.ENSP00000287934	9606.ENSP00000274063	0	FALSE	interacts with	FZD1 (interacts with) SFRP2
0.604	2346	0	0.875	0.65	40	0.173	0	0	interacts with	FZD1 (interacts with) WNT9A	0	9606.ENSP00000287934	9606.ENSP00000272164	0	FALSE	interacts with	FZD1 (interacts with) WNT9A
0.584	2348	0	0.592	0	40	0.06	0	0	interacts with	FZD1 (interacts with) NKD1	0	9606.ENSP00000287934	9606.ENSP00000268459	0	FALSE	interacts with	FZD1 (interacts with) NKD1
0.143	2350	0.053	0.691	0.65	41.7647	0	0	0.678	interacts with	FZD1 (interacts with) SFRP5	0	9606.ENSP00000287934	9606.ENSP00000266066	0	FALSE	interacts with	FZD1 (interacts with) SFRP5
0.779	2352	0.049	0.953	0.65	40	0.234	0	0	interacts with	FZD1 (interacts with) WNT2	0	9606.ENSP00000287934	9606.ENSP00000265441	0.304	FALSE	interacts with	FZD1 (interacts with) WNT2
0.878	2354	0	0.976	0.8	40	0.093	0	0	interacts with	FZD1 (interacts with) LRP6	0	9606.ENSP00000287934	9606.ENSP00000261349	0	FALSE	interacts with	FZD1 (interacts with) LRP6
0.75	2356	0	0.921	0.65	41.5789	0.173	0	0	interacts with	FZD1 (interacts with) WNT10A	0	9606.ENSP00000287934	9606.ENSP00000258411	0	FALSE	interacts with	FZD1 (interacts with) WNT10A
0.121	2358	0.043	0.554	0.5	40	0	0	0.894	interacts with	FZD1 (interacts with) FZD3	0	9606.ENSP00000287934	9606.ENSP00000240093	0.065	FALSE	interacts with	FZD1 (interacts with) FZD3
0.753	2360	0	0.928	0.65	41.4286	0.234	0	0	interacts with	FZD1 (interacts with) WNT6	0	9606.ENSP00000287934	9606.ENSP00000233948	0	FALSE	interacts with	FZD1 (interacts with) WNT6
0.405	2362	0	0.405	0	47.5	0	0	0.915	interacts with	FZD1 (interacts with) FZD10	0	9606.ENSP00000287934	9606.ENSP00000229030	0	FALSE	interacts with	FZD1 (interacts with) FZD10
0.749	2364	0	0.926	0.65	40	0.234	0	0	interacts with	FZD1 (interacts with) WNT3	0	9606.ENSP00000287934	9606.ENSP00000225512	0	FALSE	interacts with	FZD1 (interacts with) WNT3
0.702	2366	0	0.913	0.65	41.5789	0.234	0	0	interacts with	FZD1 (interacts with) WNT16	0	9606.ENSP00000287934	9606.ENSP00000222462	0	FALSE	interacts with	FZD1 (interacts with) WNT16
0.221	2368	0.053	0.719	0.65	40	0	0	0.674	interacts with	FZD1 (interacts with) SFRP1	0	9606.ENSP00000287934	9606.ENSP00000220772	0	FALSE	interacts with	FZD1 (interacts with) SFRP1
0.969	2370	0.093	0.997	0.9	40.5789	0.234	0	0	interacts with	FZD7 (interacts with) WNT11	0	9606.ENSP00000286201	9606.ENSP00000325526	0	FALSE	interacts with	FZD7 (interacts with) WNT11
0.877	2372	0	0.964	0.65	39	0.234	0	0	interacts with	FZD7 (interacts with) WNT7B	0	9606.ENSP00000286201	9606.ENSP00000341032	0	FALSE	interacts with	FZD7 (interacts with) WNT7B
0.595	2374	0.058	0.96	0.9	40.7857	0.091	0	0	interacts with	FZD7 (interacts with) RYK	0	9606.ENSP00000286201	9606.ENSP00000478721	0	FALSE	interacts with	FZD7 (interacts with) RYK
0.803	2376	0.062	0.955	0.65	40.4286	0.234	0	0	interacts with	FZD7 (interacts with) WNT5B	0	9606.ENSP00000286201	9606.ENSP00000380379	0.239	FALSE	interacts with	FZD7 (interacts with) WNT5B
0.823	2378	0	0.944	0.65	40.5789	0.173	0	0	interacts with	FZD7 (interacts with) WNT10B	0	9606.ENSP00000286201	9606.ENSP00000301061	0	FALSE	interacts with	FZD7 (interacts with) WNT10B
0.704	2380	0.059	0.942	0.8	39	0.093	0	0	interacts with	FZD7 (interacts with) LRP5	0	9606.ENSP00000286201	9606.ENSP00000294304	0	FALSE	interacts with	FZD7 (interacts with) LRP5
0.648	2384	0	0.889	0.65	39	0.173	0	0	interacts with	FZD7 (interacts with) WNT9B	0	9606.ENSP00000286201	9606.ENSP00000290015	0	FALSE	interacts with	FZD7 (interacts with) WNT9B
0.426	2386	0	0.832	0.65	40.3043	0.234	0	0	interacts with	FZD7 (interacts with) WNT8B	0	9606.ENSP00000286201	9606.ENSP00000340677	0	FALSE	interacts with	FZD7 (interacts with) WNT8B
0.422	2388	0	0.831	0.65	40.3043	0.234	0	0	interacts with	FZD7 (interacts with) WNT8A	0	9606.ENSP00000286201	9606.ENSP00000426653	0	FALSE	interacts with	FZD7 (interacts with) WNT8A
0.384	2390	0.114	0.808	0.65	41.0833	0.113	0	0	interacts with	FZD7 (interacts with) ROR2	0	9606.ENSP00000286201	9606.ENSP00000364860	0	FALSE	interacts with	FZD7 (interacts with) ROR2
0.75	2392	0.093	0.796	0	40.4706	0.172	0	0	interacts with	FZD7 (interacts with) VANGL2	0	9606.ENSP00000286201	9606.ENSP00000357040	0	FALSE	interacts with	FZD7 (interacts with) VANGL2
0.158	2394	0.049	0.695	0.65	40.6667	0	0	0.696	interacts with	FZD7 (interacts with) SFRP4	0	9606.ENSP00000286201	9606.ENSP00000410715	0	FALSE	interacts with	FZD7 (interacts with) SFRP4
0.111	2396	0.141	0.584	0.5	78	0	0	0.92	interacts with	FZD7 (interacts with) FZD8	0	9606.ENSP00000286201	9606.ENSP00000363826	0	FALSE	interacts with	FZD7 (interacts with) FZD8
0.443	2398	0.084	0.482	0	40.5789	0.067	0	0	interacts with	FZD7 (interacts with) WIF1	0	9606.ENSP00000286201	9606.ENSP00000286574	0	FALSE	interacts with	FZD7 (interacts with) WIF1
0.441	2400	0	0.441	0	42.7857	0	0	0	interacts with	FZD7 (interacts with) PORCN	0	9606.ENSP00000286201	9606.ENSP00000322304	0	FALSE	interacts with	FZD7 (interacts with) PORCN
0.336	2402	0.056	0.347	0	41.9678	0	0	0	interacts with	FZD7 (interacts with) WLS	0	9606.ENSP00000286201	9606.ENSP00000346829	0	FALSE	interacts with	FZD7 (interacts with) WLS
0.309	2404	0	0.309	0	41	0	0	0	interacts with	FZD7 (interacts with) NOTUM	0	9606.ENSP00000286201	9606.ENSP00000387310	0	FALSE	interacts with	FZD7 (interacts with) NOTUM
0.267	2406	0	0.281	0	42.9231	0.06	0	0	interacts with	FZD7 (interacts with) NKD2	0	9606.ENSP00000286201	9606.ENSP00000296849	0	FALSE	interacts with	FZD7 (interacts with) NKD2
0.211	2408	0.08	0.262	0	93.3155	0.065	0	0	interacts with	FZD7 (interacts with) GPC3	0	9606.ENSP00000286201	9606.ENSP00000377836	0	FALSE	interacts with	FZD7 (interacts with) GPC3
0.18	2410	0	0.239	0	45.0179	0.11	0	0	interacts with	FZD7 (interacts with) MUSK	0	9606.ENSP00000286201	9606.ENSP00000363571	0	FALSE	interacts with	FZD7 (interacts with) MUSK
0.985	2412	0	0.995	0.65	39	0.234	0	0	interacts with	FZD7 (interacts with) WNT7A	0	9606.ENSP00000286201	9606.ENSP00000285018	0	FALSE	interacts with	FZD7 (interacts with) WNT7A
0.194	2414	0.154	0.74	0.65	40.6667	0	0	0.687	interacts with	FZD7 (interacts with) SFRP2	0	9606.ENSP00000286201	9606.ENSP00000274063	0	FALSE	interacts with	FZD7 (interacts with) SFRP2
0.542	2416	0	0.855	0.65	39	0.173	0	0	interacts with	FZD7 (interacts with) WNT9A	0	9606.ENSP00000286201	9606.ENSP00000272164	0	FALSE	interacts with	FZD7 (interacts with) WNT9A
0.296	2418	0	0.31	0	39	0.06	0	0	interacts with	FZD7 (interacts with) NKD1	0	9606.ENSP00000286201	9606.ENSP00000268459	0	FALSE	interacts with	FZD7 (interacts with) NKD1
0.143	2420	0.053	0.691	0.65	42.3272	0	0	0.688	interacts with	FZD7 (interacts with) SFRP5	0	9606.ENSP00000286201	9606.ENSP00000266066	0	FALSE	interacts with	FZD7 (interacts with) SFRP5
0.79	2422	0.043	0.955	0.65	39	0.234	0	0	interacts with	FZD7 (interacts with) WNT2	0	9606.ENSP00000286201	9606.ENSP00000265441	0.298	FALSE	interacts with	FZD7 (interacts with) WNT2
0.945	2424	0.075	0.989	0.8	39	0.093	0	0	interacts with	FZD7 (interacts with) LRP6	0	9606.ENSP00000286201	9606.ENSP00000261349	0	FALSE	interacts with	FZD7 (interacts with) LRP6
0.721	2426	0	0.912	0.65	40.5789	0.173	0	0	interacts with	FZD7 (interacts with) WNT10A	0	9606.ENSP00000286201	9606.ENSP00000258411	0	FALSE	interacts with	FZD7 (interacts with) WNT10A
0.69	2428	0	0.909	0.65	40.4286	0.234	0	0	interacts with	FZD7 (interacts with) WNT6	0	9606.ENSP00000286201	9606.ENSP00000233948	0	FALSE	interacts with	FZD7 (interacts with) WNT6
0.846	2430	0	0.977	0.65	39	0.608	0	0	interacts with	FZD7 (interacts with) WNT3	0	9606.ENSP00000286201	9606.ENSP00000225512	0	FALSE	interacts with	FZD7 (interacts with) WNT3
0.369	2432	0	0.816	0.65	40.5789	0.234	0	0	interacts with	FZD7 (interacts with) WNT16	0	9606.ENSP00000286201	9606.ENSP00000222462	0	FALSE	interacts with	FZD7 (interacts with) WNT16
0.268	2434	0.172	0.769	0.65	39	0	0	0.678	interacts with	FZD7 (interacts with) SFRP1	0	9606.ENSP00000286201	9606.ENSP00000220772	0	FALSE	interacts with	FZD7 (interacts with) SFRP1
0.059	2436	0.08	0.689	0.5	38	0.361	0	0.98	interacts with	WNT7A (interacts with) WNT7B	0	9606.ENSP00000285018	9606.ENSP00000341032	0.05	FALSE	interacts with	WNT7A (interacts with) WNT7B
0.403	2438	0	0.688	0.5	39.3043	0	0	0.878	interacts with	WNT7A (interacts with) WNT8B	0	9606.ENSP00000285018	9606.ENSP00000340677	0	FALSE	interacts with	WNT7A (interacts with) WNT8B
0.361	2440	0	0.677	0.5	39.3043	0	0	0.85	interacts with	WNT7A (interacts with) WNT8A	0	9606.ENSP00000285018	9606.ENSP00000426653	0.071	FALSE	interacts with	WNT7A (interacts with) WNT8A
0.147	2442	0.055	0.58	0.5	40	0.08	0	0.852	interacts with	WNT7A (interacts with) WNT9B	0	9606.ENSP00000285018	9606.ENSP00000290015	0	FALSE	interacts with	WNT7A (interacts with) WNT9B
0.156	2444	0.06	0.587	0.5	40	0.08	0	0.84	interacts with	WNT7A (interacts with) WNT9A	0	9606.ENSP00000285018	9606.ENSP00000272164	0	FALSE	interacts with	WNT7A (interacts with) WNT9A
0.077	2446	0.062	0.538	0.5	37	0	0	0.96	interacts with	WNT9A (interacts with) WNT9B	0	9606.ENSP00000272164	9606.ENSP00000290015	0.059	FALSE	interacts with	WNT9A (interacts with) WNT9B
0.16	2448	0.072	0.915	0.9	39.9231	0	0	0.864	interacts with	NKD1 (interacts with) NKD2	0	9606.ENSP00000268459	9606.ENSP00000296849	0	FALSE	interacts with	NKD1 (interacts with) NKD2
0.558	2450	0.611	0.82	0	38	0	0	0	interacts with	NKD1 (interacts with) NOTUM	0	9606.ENSP00000268459	9606.ENSP00000387310	0	FALSE	interacts with	NKD1 (interacts with) NOTUM
0.589	2452	0	0.614	0	36	0.1	0	0	interacts with	NKD1 (interacts with) WNT7B	0	9606.ENSP00000268459	9606.ENSP00000341032	0	FALSE	interacts with	NKD1 (interacts with) WNT7B
0.57	2454	0.062	0.58	0	37.4706	0	0	0	interacts with	NKD1 (interacts with) VANGL2	0	9606.ENSP00000268459	9606.ENSP00000357040	0	FALSE	interacts with	NKD1 (interacts with) VANGL2
0.546	2456	0	0.564	0	75.7857	0.079	0	0	interacts with	NKD1 (interacts with) PORCN	0	9606.ENSP00000268459	9606.ENSP00000322304	0	FALSE	interacts with	NKD1 (interacts with) PORCN
0.457	2458	0.074	0.507	0	37.5789	0.1	0	0	interacts with	NKD1 (interacts with) WNT11	0	9606.ENSP00000268459	9606.ENSP00000325526	0	FALSE	interacts with	NKD1 (interacts with) WNT11
0.448	2460	0.064	0.461	0	37.5789	0	0	0	interacts with	NKD1 (interacts with) WIF1	0	9606.ENSP00000268459	9606.ENSP00000286574	0	FALSE	interacts with	NKD1 (interacts with) WIF1
0.394	2462	0	0.431	0	37.4286	0.1	0	0	interacts with	NKD1 (interacts with) WNT5B	0	9606.ENSP00000268459	9606.ENSP00000380379	0	FALSE	interacts with	NKD1 (interacts with) WNT5B
0.375	2464	0.067	0.404	0	37.6667	0.06	0	0	interacts with	NKD1 (interacts with) SFRP2	0	9606.ENSP00000268459	9606.ENSP00000274063	0	FALSE	interacts with	NKD1 (interacts with) SFRP2
0.339	2466	0	0.379	0	37.3043	0.1	0	0	interacts with	NKD1 (interacts with) WNT8B	0	9606.ENSP00000268459	9606.ENSP00000340677	0	FALSE	interacts with	NKD1 (interacts with) WNT8B
0.325	2468	0	0.367	0	36	0.1	0	0	interacts with	NKD1 (interacts with) WNT9A	0	9606.ENSP00000268459	9606.ENSP00000272164	0	FALSE	interacts with	NKD1 (interacts with) WNT9A
0.302	2470	0.048	0.35	0	37.3043	0.1	0	0	interacts with	NKD1 (interacts with) WNT8A	0	9606.ENSP00000268459	9606.ENSP00000426653	0	FALSE	interacts with	NKD1 (interacts with) WNT8A
0.299	2472	0.049	0.348	0	36	0.1	0	0	interacts with	NKD1 (interacts with) WNT7A	0	9606.ENSP00000268459	9606.ENSP00000285018	0	FALSE	interacts with	NKD1 (interacts with) WNT7A
0.299	2476	0	0.342	0	37.5789	0.1	0	0	interacts with	NKD1 (interacts with) WNT10B	0	9606.ENSP00000268459	9606.ENSP00000301061	0	FALSE	interacts with	NKD1 (interacts with) WNT10B
0.312	2478	0	0.326	0	37.6667	0.06	0	0	interacts with	NKD1 (interacts with) SFRP4	0	9606.ENSP00000268459	9606.ENSP00000410715	0	FALSE	interacts with	NKD1 (interacts with) SFRP4
0.278	2480	0.042	0.323	0	36	0.1	0	0	interacts with	NKD1 (interacts with) WNT9B	0	9606.ENSP00000268459	9606.ENSP00000290015	0	FALSE	interacts with	NKD1 (interacts with) WNT9B
0.256	2482	0.063	0.273	0	37.7857	0	0	0	interacts with	NKD1 (interacts with) RYK	0	9606.ENSP00000268459	9606.ENSP00000478721	0	FALSE	interacts with	NKD1 (interacts with) RYK
0.205	2484	0	0.205	0	38.9678	0	0	0	interacts with	NKD1 (interacts with) WLS	0	9606.ENSP00000268459	9606.ENSP00000346829	0	FALSE	interacts with	NKD1 (interacts with) WLS
0.421	2486	0.044	0.434	0	39.3272	0.06	0	0	interacts with	NKD1 (interacts with) SFRP5	0	9606.ENSP00000268459	9606.ENSP00000266066	0	FALSE	interacts with	NKD1 (interacts with) SFRP5
0.323	2488	0.053	0.372	0	36	0.1	0	0	interacts with	NKD1 (interacts with) WNT2	0	9606.ENSP00000268459	9606.ENSP00000265441	0	FALSE	interacts with	NKD1 (interacts with) WNT2
0.338	2490	0	0.378	0	37.5789	0.1	0	0	interacts with	NKD1 (interacts with) WNT10A	0	9606.ENSP00000268459	9606.ENSP00000258411	0	FALSE	interacts with	NKD1 (interacts with) WNT10A
0.424	2492	0.042	0.46	0	37.4286	0.1	0	0	interacts with	NKD1 (interacts with) WNT6	0	9606.ENSP00000268459	9606.ENSP00000233948	0	FALSE	interacts with	NKD1 (interacts with) WNT6
0.352	2494	0.048	0.396	0	36	0.1	0	0	interacts with	NKD1 (interacts with) WNT3	0	9606.ENSP00000268459	9606.ENSP00000225512	0	FALSE	interacts with	NKD1 (interacts with) WNT3
0.334	2496	0	0.375	0	37.5789	0.1	0	0	interacts with	NKD1 (interacts with) WNT16	0	9606.ENSP00000268459	9606.ENSP00000222462	0	FALSE	interacts with	NKD1 (interacts with) WNT16
0.421	2498	0.044	0.434	0	36	0.06	0	0	interacts with	NKD1 (interacts with) SFRP1	0	9606.ENSP00000268459	9606.ENSP00000220772	0	FALSE	interacts with	NKD1 (interacts with) SFRP1
0.438	2500	0.042	0.715	0.5	36.3043	0	0	0.865	interacts with	WNT2 (interacts with) WNT8B	0	9606.ENSP00000265441	9606.ENSP00000340677	0.067	FALSE	interacts with	WNT2 (interacts with) WNT8B
0.152	2502	0.087	0.584	0.5	39.5397	0	0	0.927	interacts with	WNT2 (interacts with) WNT5B	0	9606.ENSP00000265441	9606.ENSP00000380379	0.052	FALSE	interacts with	WNT2 (interacts with) WNT5B
0.149	2504	0.055	0.58	0.5	37	0.08	0	0.852	interacts with	WNT2 (interacts with) WNT9B	0	9606.ENSP00000265441	9606.ENSP00000290015	0	FALSE	interacts with	WNT2 (interacts with) WNT9B
0.132	2506	0.055	0.572	0.5	37	0.08	0	0.841	interacts with	WNT2 (interacts with) WNT9A	0	9606.ENSP00000265441	9606.ENSP00000272164	0	FALSE	interacts with	WNT2 (interacts with) WNT9A
0.12	2510	0.042	0.555	0.5	36.3043	0	0	0.854	interacts with	WNT2 (interacts with) WNT8A	0	9606.ENSP00000265441	9606.ENSP00000426653	0.07	FALSE	interacts with	WNT2 (interacts with) WNT8A
0.092	2512	0	0.535	0.5	35	0	0	0.917	interacts with	WNT2 (interacts with) WNT7A	0	9606.ENSP00000265441	9606.ENSP00000285018	0.059	FALSE	interacts with	WNT2 (interacts with) WNT7A
0.091	2514	0	0.534	0.5	35	0	0	0.923	interacts with	WNT2 (interacts with) WNT7B	0	9606.ENSP00000265441	9606.ENSP00000341032	0.057	FALSE	interacts with	WNT2 (interacts with) WNT7B
0.109	2516	0.042	0.535	0.5	36.4286	0	0	0.891	interacts with	WNT2 (interacts with) WNT6	0	9606.ENSP00000265441	9606.ENSP00000233948	0	FALSE	interacts with	WNT2 (interacts with) WNT6
0.465	2518	0	0.743	0.54	35	0	0	0.92	interacts with	WNT2 (interacts with) WNT3	0	9606.ENSP00000265441	9606.ENSP00000225512	0	FALSE	interacts with	WNT2 (interacts with) WNT3
0.963	2520	0	0.987	0.65	34	0.097	0	0	interacts with	LRP6 (interacts with) WNT7A	0	9606.ENSP00000261349	9606.ENSP00000285018	0	FALSE	interacts with	LRP6 (interacts with) WNT7A
0.948	2522	0	0.982	0.65	34	0.095	0	0	interacts with	LRP6 (interacts with) WNT2	0	9606.ENSP00000261349	9606.ENSP00000265441	0	FALSE	interacts with	LRP6 (interacts with) WNT2
0.936	2524	0	0.981	0.65	35.5789	0.229	0	0	interacts with	LRP6 (interacts with) WNT10B	0	9606.ENSP00000261349	9606.ENSP00000301061	0	FALSE	interacts with	LRP6 (interacts with) WNT10B
0.865	2526	0	0.953	0.65	34	0.097	0	0	interacts with	LRP6 (interacts with) WNT7B	0	9606.ENSP00000261349	9606.ENSP00000341032	0	FALSE	interacts with	LRP6 (interacts with) WNT7B
0.713	2530	0	0.901	0.65	38.5397	0.095	0	0	interacts with	LRP6 (interacts with) WNT5B	0	9606.ENSP00000261349	9606.ENSP00000380379	0	FALSE	interacts with	LRP6 (interacts with) WNT5B
0.707	2532	0	0.898	0.65	36	0.091	0	0	interacts with	LRP6 (interacts with) WNT9B	0	9606.ENSP00000261349	9606.ENSP00000290015	0	FALSE	interacts with	LRP6 (interacts with) WNT9B
0.701	2534	0.055	0.898	0.65	35.3043	0.095	0	0	interacts with	LRP6 (interacts with) WNT8A	0	9606.ENSP00000261349	9606.ENSP00000426653	0	FALSE	interacts with	LRP6 (interacts with) WNT8A
0.608	2536	0	0.865	0.65	35.3043	0.095	0	0	interacts with	LRP6 (interacts with) WNT8B	0	9606.ENSP00000261349	9606.ENSP00000340677	0	FALSE	interacts with	LRP6 (interacts with) WNT8B
0.601	2538	0.042	0.862	0.65	35.5789	0.095	0	0	interacts with	LRP6 (interacts with) WNT11	0	9606.ENSP00000261349	9606.ENSP00000325526	0	FALSE	interacts with	LRP6 (interacts with) WNT11
0.693	2540	0.086	0.817	0.4	42.5789	0	0	0	interacts with	LRP6 (interacts with) WIF1	0	9606.ENSP00000261349	9606.ENSP00000286574	0	FALSE	interacts with	LRP6 (interacts with) WIF1
0.448	2542	0	0.809	0.65	36	0.091	0	0	interacts with	LRP6 (interacts with) WNT9A	0	9606.ENSP00000261349	9606.ENSP00000272164	0	FALSE	interacts with	LRP6 (interacts with) WNT9A
0.658	2544	0	0.797	0.4	45	0.093	0	0	interacts with	LRP6 (interacts with) SFRP2	0	9606.ENSP00000261349	9606.ENSP00000274063	0	FALSE	interacts with	LRP6 (interacts with) SFRP2
0.68	2546	0	0.693	0	47.1667	0.08	0	0	interacts with	LRP6 (interacts with) SFRP4	0	9606.ENSP00000261349	9606.ENSP00000410715	0	FALSE	interacts with	LRP6 (interacts with) SFRP4
0.631	2548	0.06	0.638	0	35.7857	0	0	0	interacts with	LRP6 (interacts with) RYK	0	9606.ENSP00000261349	9606.ENSP00000478721	0	FALSE	interacts with	LRP6 (interacts with) RYK
0.587	2550	0	0.609	0	46.6605	0.093	0	0	interacts with	LRP6 (interacts with) SFRP5	0	9606.ENSP00000261349	9606.ENSP00000266066	0	FALSE	interacts with	LRP6 (interacts with) SFRP5
0.547	2552	0	0.547	0	60.7857	0	0	0	interacts with	LRP6 (interacts with) PORCN	0	9606.ENSP00000261349	9606.ENSP00000322304	0	FALSE	interacts with	LRP6 (interacts with) PORCN
0.434	2554	0.067	0.459	0	49.5833	0.057	0	0	interacts with	LRP6 (interacts with) ROR2	0	9606.ENSP00000261349	9606.ENSP00000364860	0	FALSE	interacts with	LRP6 (interacts with) ROR2
0.423	2556	0.042	0.423	0	43.9678	0	0	0	interacts with	LRP6 (interacts with) WLS	0	9606.ENSP00000261349	9606.ENSP00000346829	0	FALSE	interacts with	LRP6 (interacts with) WLS
0.402	2558	0.072	0.422	0	42.4706	0	0	0	interacts with	LRP6 (interacts with) VANGL2	0	9606.ENSP00000261349	9606.ENSP00000357040	0	FALSE	interacts with	LRP6 (interacts with) VANGL2
0.37	2560	0	0.373	0	75.5	0.046	0	0	interacts with	LRP6 (interacts with) NKD1	0	9606.ENSP00000261349	9606.ENSP00000268459	0	FALSE	interacts with	LRP6 (interacts with) NKD1
0.296	2562	0.067	0.339	0	53.5179	0.075	0	0	interacts with	LRP6 (interacts with) MUSK	0	9606.ENSP00000261349	9606.ENSP00000363571	0	FALSE	interacts with	LRP6 (interacts with) MUSK
0.306	2564	0	0.309	0	79.4231	0.046	0	0	interacts with	LRP6 (interacts with) NKD2	0	9606.ENSP00000261349	9606.ENSP00000296849	0	FALSE	interacts with	LRP6 (interacts with) NKD2
0.287	2566	0	0.287	0	50	0	0	0	interacts with	LRP6 (interacts with) NOTUM	0	9606.ENSP00000261349	9606.ENSP00000387310	0	FALSE	interacts with	LRP6 (interacts with) NOTUM
0.752	2568	0	0.914	0.65	42.5789	0.091	0	0	interacts with	LRP6 (interacts with) WNT10A	0	9606.ENSP00000261349	9606.ENSP00000258411	0	FALSE	interacts with	LRP6 (interacts with) WNT10A
0.705	2570	0	0.898	0.65	35.4286	0.095	0	0	interacts with	LRP6 (interacts with) WNT6	0	9606.ENSP00000261349	9606.ENSP00000233948	0	FALSE	interacts with	LRP6 (interacts with) WNT6
0.928	2572	0	0.987	0.72	34	0.438	0	0	interacts with	LRP6 (interacts with) WNT3	0	9606.ENSP00000261349	9606.ENSP00000225512	0	FALSE	interacts with	LRP6 (interacts with) WNT3
0.658	2574	0	0.882	0.65	40.2456	0.095	0	0	interacts with	LRP6 (interacts with) WNT16	0	9606.ENSP00000261349	9606.ENSP00000222462	0	FALSE	interacts with	LRP6 (interacts with) WNT16
0.826	2576	0.083	0.901	0.4	41	0.093	0	0	interacts with	LRP6 (interacts with) SFRP1	0	9606.ENSP00000261349	9606.ENSP00000220772	0	FALSE	interacts with	LRP6 (interacts with) SFRP1
0.962	2578	0	0.996	0.9	34.5789	0.234	0	0	interacts with	FZD3 (interacts with) WNT11	0	9606.ENSP00000240093	9606.ENSP00000325526	0	FALSE	interacts with	FZD3 (interacts with) WNT11
0.833	2580	0	0.986	0.9	34.4286	0.234	0	0	interacts with	FZD3 (interacts with) WNT5B	0	9606.ENSP00000240093	9606.ENSP00000380379	0	FALSE	interacts with	FZD3 (interacts with) WNT5B
0.569	2582	0.053	0.957	0.9	33	0.091	0	0	interacts with	FZD3 (interacts with) RYK	0	9606.ENSP00000240093	9606.ENSP00000478721	0	FALSE	interacts with	FZD3 (interacts with) RYK
0.892	2584	0.078	0.953	0.5	33	0.172	0	0	interacts with	FZD3 (interacts with) VANGL2	0	9606.ENSP00000240093	9606.ENSP00000357040	0	FALSE	interacts with	FZD3 (interacts with) VANGL2
0.818	2586	0	0.947	0.65	33	0.234	0	0	interacts with	FZD3 (interacts with) WNT7B	0	9606.ENSP00000240093	9606.ENSP00000341032	0	FALSE	interacts with	FZD3 (interacts with) WNT7B
0.811	2588	0	0.945	0.65	33	0.234	0	0	interacts with	FZD3 (interacts with) WNT7A	0	9606.ENSP00000240093	9606.ENSP00000285018	0	FALSE	interacts with	FZD3 (interacts with) WNT7A
0.695	2590	0	0.939	0.8	33	0.093	0	0	interacts with	FZD3 (interacts with) LRP5	0	9606.ENSP00000240093	9606.ENSP00000294304	0	FALSE	interacts with	FZD3 (interacts with) LRP5
0.748	2594	0	0.926	0.65	33	0.234	0	0	interacts with	FZD3 (interacts with) WNT2	0	9606.ENSP00000240093	9606.ENSP00000265441	0	FALSE	interacts with	FZD3 (interacts with) WNT2
0.55	2596	0.061	0.913	0.8	33	0.093	0	0	interacts with	FZD3 (interacts with) LRP6	0	9606.ENSP00000240093	9606.ENSP00000261349	0	FALSE	interacts with	FZD3 (interacts with) LRP6
0.488	2598	0	0.839	0.65	33	0.173	0	0	interacts with	FZD3 (interacts with) WNT9A	0	9606.ENSP00000240093	9606.ENSP00000272164	0	FALSE	interacts with	FZD3 (interacts with) WNT9A
0.434	2600	0	0.835	0.65	34.3043	0.234	0	0	interacts with	FZD3 (interacts with) WNT8B	0	9606.ENSP00000240093	9606.ENSP00000340677	0	FALSE	interacts with	FZD3 (interacts with) WNT8B
0.45	2602	0	0.827	0.65	34.5789	0.173	0	0	interacts with	FZD3 (interacts with) WNT10A	0	9606.ENSP00000240093	9606.ENSP00000258411	0	FALSE	interacts with	FZD3 (interacts with) WNT10A
0.401	2604	0	0.825	0.65	34.3043	0.234	0	0	interacts with	FZD3 (interacts with) WNT8A	0	9606.ENSP00000240093	9606.ENSP00000426653	0	FALSE	interacts with	FZD3 (interacts with) WNT8A
0.418	2606	0	0.817	0.65	33	0.173	0	0	interacts with	FZD3 (interacts with) WNT9B	0	9606.ENSP00000240093	9606.ENSP00000290015	0	FALSE	interacts with	FZD3 (interacts with) WNT9B
0.418	2608	0	0.816	0.65	34.5789	0.173	0	0	interacts with	FZD3 (interacts with) WNT10B	0	9606.ENSP00000240093	9606.ENSP00000301061	0	FALSE	interacts with	FZD3 (interacts with) WNT10B
0.374	2610	0.063	0.793	0.65	33	0.113	0	0	interacts with	FZD3 (interacts with) ROR2	0	9606.ENSP00000240093	9606.ENSP00000364860	0	FALSE	interacts with	FZD3 (interacts with) ROR2
0.18	2612	0	0.7	0.65	34.6667	0	0	0.649	interacts with	FZD3 (interacts with) SFRP2	0	9606.ENSP00000240093	9606.ENSP00000274063	0	FALSE	interacts with	FZD3 (interacts with) SFRP2
0.415	2614	0	0.695	0.5	66	0	0	0.844	interacts with	FZD3 (interacts with) FZD4	0	9606.ENSP00000240093	9606.ENSP00000434034	0	FALSE	interacts with	FZD3 (interacts with) FZD4
0.163	2616	0	0.694	0.65	34.7647	0	0	0.631	interacts with	FZD3 (interacts with) SFRP5	0	9606.ENSP00000240093	9606.ENSP00000266066	0	FALSE	interacts with	FZD3 (interacts with) SFRP5
0.408	2618	0.045	0.692	0.5	57.75	0	0	0.944	interacts with	FZD3 (interacts with) FZD6	0	9606.ENSP00000240093	9606.ENSP00000351605	0	FALSE	interacts with	FZD3 (interacts with) FZD6
0.153	2620	0	0.691	0.65	34.6667	0	0	0.661	interacts with	FZD3 (interacts with) SFRP4	0	9606.ENSP00000240093	9606.ENSP00000410715	0	FALSE	interacts with	FZD3 (interacts with) SFRP4
0.394	2622	0.043	0.684	0.5	49.5	0	0	0.855	interacts with	FZD3 (interacts with) FZD5	0	9606.ENSP00000240093	9606.ENSP00000354607	0	FALSE	interacts with	FZD3 (interacts with) FZD5
0.164	2624	0	0.564	0.5	49.5	0	0	0.804	interacts with	FZD3 (interacts with) FZD8	0	9606.ENSP00000240093	9606.ENSP00000363826	0	FALSE	interacts with	FZD3 (interacts with) FZD8
0.095	2626	0.056	0.542	0.5	41.25	0	0	0.914	interacts with	FZD3 (interacts with) FZD7	0	9606.ENSP00000240093	9606.ENSP00000286201	0.055	FALSE	interacts with	FZD3 (interacts with) FZD7
0.416	2628	0.047	0.436	0	34.5789	0.067	0	0	interacts with	FZD3 (interacts with) WIF1	0	9606.ENSP00000240093	9606.ENSP00000286574	0	FALSE	interacts with	FZD3 (interacts with) WIF1
0.375	2630	0.049	0.392	0	33	0.06	0	0	interacts with	FZD3 (interacts with) NKD1	0	9606.ENSP00000240093	9606.ENSP00000268459	0	FALSE	interacts with	FZD3 (interacts with) NKD1
0.348	2632	0	0.348	0	35	0	0	0	interacts with	FZD3 (interacts with) NOTUM	0	9606.ENSP00000240093	9606.ENSP00000387310	0	FALSE	interacts with	FZD3 (interacts with) NOTUM
0.321	2634	0	0.321	0	35	0	0	0	interacts with	FZD3 (interacts with) PORCN	0	9606.ENSP00000240093	9606.ENSP00000322304	0	FALSE	interacts with	FZD3 (interacts with) PORCN
0.318	2636	0.042	0.319	0	34.5789	0	0	0	interacts with	FZD3 (interacts with) WLS	0	9606.ENSP00000240093	9606.ENSP00000346829	0	FALSE	interacts with	FZD3 (interacts with) WLS
0.18	2638	0	0.239	0	36.5179	0.11	0	0	interacts with	FZD3 (interacts with) MUSK	0	9606.ENSP00000240093	9606.ENSP00000363571	0	FALSE	interacts with	FZD3 (interacts with) MUSK
0.224	2640	0	0.239	0	35	0.06	0	0	interacts with	FZD3 (interacts with) NKD2	0	9606.ENSP00000240093	9606.ENSP00000296849	0	FALSE	interacts with	FZD3 (interacts with) NKD2
0.724	2642	0	0.919	0.65	34.4286	0.234	0	0	interacts with	FZD3 (interacts with) WNT6	0	9606.ENSP00000240093	9606.ENSP00000233948	0	FALSE	interacts with	FZD3 (interacts with) WNT6
0.53	2644	0	0.863	0.65	33	0.234	0	0	interacts with	FZD3 (interacts with) WNT3	0	9606.ENSP00000240093	9606.ENSP00000225512	0	FALSE	interacts with	FZD3 (interacts with) WNT3
0.647	2646	0.042	0.897	0.65	34.5789	0.234	0	0	interacts with	FZD3 (interacts with) WNT16	0	9606.ENSP00000240093	9606.ENSP00000222462	0	FALSE	interacts with	FZD3 (interacts with) WNT16
0.236	2648	0.047	0.723	0.65	33	0	0	0.64	interacts with	FZD3 (interacts with) SFRP1	0	9606.ENSP00000240093	9606.ENSP00000220772	0	FALSE	interacts with	FZD3 (interacts with) SFRP1
0.456	2650	0.067	0.724	0.5	33.3043	0	0	0.854	interacts with	WNT3 (interacts with) WNT8B	0	9606.ENSP00000225512	9606.ENSP00000340677	0	FALSE	interacts with	WNT3 (interacts with) WNT8B
0.193	2652	0.098	0.632	0.5	34	0.08	0	0.819	interacts with	WNT3 (interacts with) WNT9B	0	9606.ENSP00000225512	9606.ENSP00000290015	0.071	FALSE	interacts with	WNT3 (interacts with) WNT9B
0.185	2654	0.087	0.611	0.5	34	0.08	0	0.805	interacts with	WNT3 (interacts with) WNT9A	0	9606.ENSP00000225512	9606.ENSP00000272164	0	FALSE	interacts with	WNT3 (interacts with) WNT9A
0.141	2656	0	0.581	0.5	33.3043	0.079	0	0.852	interacts with	WNT3 (interacts with) WNT8A	0	9606.ENSP00000225512	9606.ENSP00000426653	0.066	FALSE	interacts with	WNT3 (interacts with) WNT8A
0.124	2658	0.042	0.553	0.5	33.4286	0	0	0.888	interacts with	WNT3 (interacts with) WNT6	0	9606.ENSP00000225512	9606.ENSP00000233948	0.06	FALSE	interacts with	WNT3 (interacts with) WNT6
0.094	2660	0.054	0.542	0.5	32	0	0	0.922	interacts with	WNT3 (interacts with) WNT7B	0	9606.ENSP00000225512	9606.ENSP00000341032	0.059	FALSE	interacts with	WNT3 (interacts with) WNT7B
0.097	2662	0	0.535	0.5	32	0	0	0.918	interacts with	WNT3 (interacts with) WNT7A	0	9606.ENSP00000225512	9606.ENSP00000285018	0.054	FALSE	interacts with	WNT3 (interacts with) WNT7A
0.105	2664	0.042	0.533	0.5	36.5397	0	0	0.922	interacts with	WNT3 (interacts with) WNT5B	0	9606.ENSP00000225512	9606.ENSP00000380379	0	FALSE	interacts with	WNT3 (interacts with) WNT5B
0.874	2666	0	0.963	0.65	31	0.234	0	0	interacts with	SFRP1 (interacts with) WNT7B	0	9606.ENSP00000220772	9606.ENSP00000341032	0	FALSE	interacts with	SFRP1 (interacts with) WNT7B
0.8	2668	0	0.941	0.65	32.3043	0.234	0	0	interacts with	SFRP1 (interacts with) WNT8B	0	9606.ENSP00000220772	9606.ENSP00000340677	0	FALSE	interacts with	SFRP1 (interacts with) WNT8B
0.76	2670	0	0.93	0.65	31	0.234	0	0	interacts with	SFRP1 (interacts with) WNT7A	0	9606.ENSP00000220772	9606.ENSP00000285018	0	FALSE	interacts with	SFRP1 (interacts with) WNT7A
0.667	2672	0	0.928	0.65	31	0.434	0	0	interacts with	SFRP1 (interacts with) WNT2	0	9606.ENSP00000220772	9606.ENSP00000265441	0	FALSE	interacts with	SFRP1 (interacts with) WNT2
0.919	2674	0.071	0.924	0	32.5789	0.067	0	0	interacts with	SFRP1 (interacts with) WIF1	0	9606.ENSP00000220772	9606.ENSP00000286574	0	FALSE	interacts with	SFRP1 (interacts with) WIF1
0.73	2676	0	0.921	0.65	31	0.234	0	0	interacts with	SFRP1 (interacts with) WNT3	0	9606.ENSP00000220772	9606.ENSP00000225512	0	FALSE	interacts with	SFRP1 (interacts with) WNT3
0.719	2678	0.043	0.918	0.65	32.4286	0.234	0	0	interacts with	SFRP1 (interacts with) WNT6	0	9606.ENSP00000220772	9606.ENSP00000233948	0	FALSE	interacts with	SFRP1 (interacts with) WNT6
0.702	2680	0.067	0.915	0.65	32.4286	0.234	0	0	interacts with	SFRP1 (interacts with) WNT5B	0	9606.ENSP00000220772	9606.ENSP00000380379	0	FALSE	interacts with	SFRP1 (interacts with) WNT5B
0.68	2682	0	0.906	0.65	32.5789	0.234	0	0	interacts with	SFRP1 (interacts with) WNT16	0	9606.ENSP00000220772	9606.ENSP00000222462	0	FALSE	interacts with	SFRP1 (interacts with) WNT16
0.594	2686	0	0.881	0.65	32.5789	0.234	0	0	interacts with	SFRP1 (interacts with) WNT11	0	9606.ENSP00000220772	9606.ENSP00000325526	0	FALSE	interacts with	SFRP1 (interacts with) WNT11
0.594	2688	0	0.872	0.65	32.5789	0.173	0	0	interacts with	SFRP1 (interacts with) WNT10B	0	9606.ENSP00000220772	9606.ENSP00000301061	0	FALSE	interacts with	SFRP1 (interacts with) WNT10B
0.518	2690	0	0.848	0.65	31	0.173	0	0	interacts with	SFRP1 (interacts with) WNT9A	0	9606.ENSP00000220772	9606.ENSP00000272164	0	FALSE	interacts with	SFRP1 (interacts with) WNT9A
0.494	2692	0	0.84	0.65	32.5789	0.173	0	0	interacts with	SFRP1 (interacts with) WNT10A	0	9606.ENSP00000220772	9606.ENSP00000258411	0	FALSE	interacts with	SFRP1 (interacts with) WNT10A
0.402	2694	0	0.825	0.65	32.3043	0.234	0	0	interacts with	SFRP1 (interacts with) WNT8A	0	9606.ENSP00000220772	9606.ENSP00000426653	0	FALSE	interacts with	SFRP1 (interacts with) WNT8A
0.405	2696	0	0.812	0.65	31	0.173	0	0	interacts with	SFRP1 (interacts with) WNT9B	0	9606.ENSP00000220772	9606.ENSP00000290015	0	FALSE	interacts with	SFRP1 (interacts with) WNT9B
0.592	2698	0.126	0.679	0	32.4706	0.172	0	0	interacts with	SFRP1 (interacts with) VANGL2	0	9606.ENSP00000220772	9606.ENSP00000357040	0	FALSE	interacts with	SFRP1 (interacts with) VANGL2
0.442	2700	0.072	0.461	0	52.6667	0	0	0.639	interacts with	SFRP1 (interacts with) SFRP4	0	9606.ENSP00000220772	9606.ENSP00000410715	0	FALSE	interacts with	SFRP1 (interacts with) SFRP4
0.329	2702	0.064	0.345	0	35.5234	0	0	0	interacts with	SFRP1 (interacts with) WLS	0	9606.ENSP00000220772	9606.ENSP00000346829	0	FALSE	interacts with	SFRP1 (interacts with) WLS
0.162	2704	0.143	0.317	0	54.6667	0.126	0	0.892	interacts with	SFRP1 (interacts with) SFRP2	0	9606.ENSP00000220772	9606.ENSP00000274063	0	FALSE	interacts with	SFRP1 (interacts with) SFRP2
0.785	2706	0.116	0.802	0	68.9661	0	0	0	interacts with	ADGRA2 (interacts with) FZD4	0	9606.ENSP00000406367	9606.ENSP00000434034	0	FALSE	interacts with	ADGRA2 (interacts with) FZD4
0.183	2708	0.059	0.319	0	51.5376	0.184	0	0	interacts with	ADGRA2 (interacts with) RYK	0	9606.ENSP00000406367	9606.ENSP00000478721	0	FALSE	interacts with	ADGRA2 (interacts with) RYK
0.27	2710	0	0.517	0.36	82.1804	0.05	0	0	interacts with	ADGRA2 (interacts with) DVL1	0	9606.ENSP00000406367	9606.ENSP00000368166	0	FALSE	interacts with	ADGRA2 (interacts with) DVL1
0.092	2712	0.084	0.186	0	51.5376	0.1	0	0	interacts with	ADGRA2 (interacts with) ROR2	0	9606.ENSP00000406367	9606.ENSP00000364860	0	FALSE	interacts with	ADGRA2 (interacts with) ROR2
0.235	2714	0.067	0.256	0	63.9661	0	0	0	interacts with	ADGRA2 (interacts with) FZD8	0	9606.ENSP00000406367	9606.ENSP00000363826	0	FALSE	interacts with	ADGRA2 (interacts with) FZD8
0.202	2716	0	0.202	0	146.466	0	0	0	interacts with	ADGRA2 (interacts with) DKK1	0	9606.ENSP00000406367	9606.ENSP00000363081	0	FALSE	interacts with	ADGRA2 (interacts with) DKK1
0.182	2718	0.06	0.223	0	46.4395	0.071	0	0	interacts with	ADGRA2 (interacts with) VANGL2	0	9606.ENSP00000406367	9606.ENSP00000357040	0	FALSE	interacts with	ADGRA2 (interacts with) VANGL2
0.215	2720	0.067	0.236	0	63.9661	0	0	0	interacts with	ADGRA2 (interacts with) FZD5	0	9606.ENSP00000406367	9606.ENSP00000354607	0	FALSE	interacts with	ADGRA2 (interacts with) FZD5
0.295	2722	0.042	0.295	0	64.6804	0	0	0	interacts with	ADGRA2 (interacts with) FZD6	0	9606.ENSP00000406367	9606.ENSP00000351605	0	FALSE	interacts with	ADGRA2 (interacts with) FZD6
0.188	2724	0.058	0.203	0	59.6804	0	0	0	interacts with	ADGRA2 (interacts with) FZD9	0	9606.ENSP00000406367	9606.ENSP00000345785	0	FALSE	interacts with	ADGRA2 (interacts with) FZD9
0.683	2726	0	0.683	0	32.6087	0	0	0	interacts with	ADGRA2 (interacts with) WNT7B	0	9606.ENSP00000406367	9606.ENSP00000341032	0	FALSE	interacts with	ADGRA2 (interacts with) WNT7B
0.199	2728	0.127	0.271	0	68.9661	0	0	0	interacts with	ADGRA2 (interacts with) FZD2	0	9606.ENSP00000406367	9606.ENSP00000323901	0	FALSE	interacts with	ADGRA2 (interacts with) FZD2
0.151	2730	0.045	0.162	0	82.1804	0.05	0	0	interacts with	ADGRA2 (interacts with) DVL3	0	9606.ENSP00000406367	9606.ENSP00000316054	0	FALSE	interacts with	ADGRA2 (interacts with) DVL3
0.682	2732	0.057	0.908	0.72	59.6804	0.042	0	0	interacts with	ADGRA2 (interacts with) LRP5	0	9606.ENSP00000406367	9606.ENSP00000294304	0	FALSE	interacts with	ADGRA2 (interacts with) LRP5
0.17	2734	0	0.17	0	30	0	0	0	interacts with	ADGRA2 (interacts with) WNT9B	0	9606.ENSP00000406367	9606.ENSP00000290015	0	FALSE	interacts with	ADGRA2 (interacts with) WNT9B
0.256	2736	0.097	0.664	0.54	71.4661	0	0	0	interacts with	ADGRA2 (interacts with) FZD1	0	9606.ENSP00000406367	9606.ENSP00000287934	0	FALSE	interacts with	ADGRA2 (interacts with) FZD1
0.227	2738	0.062	0.244	0	63.9661	0	0	0	interacts with	ADGRA2 (interacts with) FZD7	0	9606.ENSP00000406367	9606.ENSP00000286201	0	FALSE	interacts with	ADGRA2 (interacts with) FZD7
0.747	2740	0	0.747	0	32.6087	0	0	0	interacts with	ADGRA2 (interacts with) WNT7A	0	9606.ENSP00000406367	9606.ENSP00000285018	0	FALSE	interacts with	ADGRA2 (interacts with) WNT7A
0.167	2742	0	0.167	0	30	0	0	0	interacts with	ADGRA2 (interacts with) WNT9A	0	9606.ENSP00000406367	9606.ENSP00000272164	0	FALSE	interacts with	ADGRA2 (interacts with) WNT9A
0.219	2744	0.042	0.219	0	57.5376	0	0	0	interacts with	ADGRA2 (interacts with) NKD1	0	9606.ENSP00000406367	9606.ENSP00000268459	0	FALSE	interacts with	ADGRA2 (interacts with) NKD1
0.15	2746	0.082	0.609	0.54	36.9658	0	0	0	interacts with	ADGRA2 (interacts with) WNT2	0	9606.ENSP00000406367	9606.ENSP00000265441	0	FALSE	interacts with	ADGRA2 (interacts with) WNT2
0.333	2748	0	0.805	0.72	59.6804	0.042	0	0	interacts with	ADGRA2 (interacts with) LRP6	0	9606.ENSP00000406367	9606.ENSP00000261349	0	FALSE	interacts with	ADGRA2 (interacts with) LRP6
0.171	2750	0	0.171	0	59.6804	0	0	0	interacts with	ADGRA2 (interacts with) FZD3	0	9606.ENSP00000406367	9606.ENSP00000240093	0	FALSE	interacts with	ADGRA2 (interacts with) FZD3
0.167	2752	0	0.756	0.72	35.4658	0	0	0	interacts with	ADGRA2 (interacts with) WNT3	0	9606.ENSP00000406367	9606.ENSP00000225512	0	FALSE	interacts with	ADGRA2 (interacts with) WNT3
0.147	2754	0.062	0.165	0	49.7729	0	0	0	interacts with	ADGRA2 (interacts with) SFRP1	0	9606.ENSP00000406367	9606.ENSP00000220772	0	FALSE	interacts with	ADGRA2 (interacts with) SFRP1
0.398	1392	0	0.398	0		0	0	0	interacts with	CCN4 (interacts with) WNT6	0	9606.ENSP00000250160	9606.ENSP00000233948	0	FALSE	interacts with	CCN4 (interacts with) WNT6
0.421	1328	0	0.421	0		0	0	0	interacts with	CCN4 (interacts with) LRP6	0	9606.ENSP00000250160	9606.ENSP00000261349	0	FALSE	interacts with	CCN4 (interacts with) LRP6
0.16	1394	0.056	0.173	0		0	0	0	interacts with	CCN4 (interacts with) FZD10	0	9606.ENSP00000250160	9606.ENSP00000229030	0	FALSE	interacts with	CCN4 (interacts with) FZD10
0.323	1396	0	0.323	0		0	0	0	interacts with	CCN4 (interacts with) WNT3	0	9606.ENSP00000250160	9606.ENSP00000225512	0	FALSE	interacts with	CCN4 (interacts with) WNT3
0.417	1332	0	0.417	0		0	0	0	interacts with	CCN4 (interacts with) WIF1	0	9606.ENSP00000250160	9606.ENSP00000286574	0	FALSE	interacts with	CCN4 (interacts with) WIF1
0.41	1398	0	0.41	0		0	0	0	interacts with	CCN4 (interacts with) WNT16	0	9606.ENSP00000250160	9606.ENSP00000222462	0	FALSE	interacts with	CCN4 (interacts with) WNT16
0.403	1334	0	0.403	0		0	0	0	interacts with	CCN4 (interacts with) WNT11	0	9606.ENSP00000250160	9606.ENSP00000325526	0	FALSE	interacts with	CCN4 (interacts with) WNT11
0.246	1400	0.048	0.252	0		0	0	0	interacts with	CCN4 (interacts with) DKK4	0	9606.ENSP00000250160	9606.ENSP00000220812	0	FALSE	interacts with	CCN4 (interacts with) DKK4
0.371	1336	0.074	0.392	0		0	0	0	interacts with	CCN4 (interacts with) FZD1	0	9606.ENSP00000250160	9606.ENSP00000287934	0	FALSE	interacts with	CCN4 (interacts with) FZD1
0.442	1402	0.072	0.46	0		0	0	0	interacts with	CCN4 (interacts with) SFRP1	0	9606.ENSP00000250160	9606.ENSP00000220772	0	FALSE	interacts with	CCN4 (interacts with) SFRP1
0.377	1338	0	0.377	0		0	0	0	interacts with	CCN4 (interacts with) WNT7B	0	9606.ENSP00000250160	9606.ENSP00000341032	0	FALSE	interacts with	CCN4 (interacts with) WNT7B
0.341	1340	0.072	0.363	0		0	0	0	interacts with	CCN4 (interacts with) WNT5B	0	9606.ENSP00000250160	9606.ENSP00000380379	0	FALSE	interacts with	CCN4 (interacts with) WNT5B
0.311	1342	0.092	0.348	0		0	0	0	interacts with	CCN4 (interacts with) WNT9A	0	9606.ENSP00000250160	9606.ENSP00000272164	0	FALSE	interacts with	CCN4 (interacts with) WNT9A
0.348	1344	0	0.347	0		0	0	0	interacts with	CCN4 (interacts with) FZD9	0	9606.ENSP00000250160	9606.ENSP00000345785	0	FALSE	interacts with	CCN4 (interacts with) FZD9
0.348	1346	0	0.347	0		0	0	0	interacts with	CCN4 (interacts with) DVL1	0	9606.ENSP00000250160	9606.ENSP00000368166	0	FALSE	interacts with	CCN4 (interacts with) DVL1
0.325	1348	0.069	0.346	0		0	0	0	interacts with	CCN4 (interacts with) FZD6	0	9606.ENSP00000250160	9606.ENSP00000351605	0	FALSE	interacts with	CCN4 (interacts with) FZD6
0.337	1350	0	0.337	0		0	0	0	interacts with	CCN4 (interacts with) WNT10A	0	9606.ENSP00000250160	9606.ENSP00000258411	0	FALSE	interacts with	CCN4 (interacts with) WNT10A
0.323	1352	0.042	0.323	0		0	0	0	interacts with	CCN4 (interacts with) FZD2	0	9606.ENSP00000250160	9606.ENSP00000323901	0	FALSE	interacts with	CCN4 (interacts with) FZD2
0.304	1354	0.061	0.319	0		0	0	0	interacts with	CCN4 (interacts with) FZD4	0	9606.ENSP00000250160	9606.ENSP00000434034	0	FALSE	interacts with	CCN4 (interacts with) FZD4
0.3	1356	0.059	0.313	0		0	0	0	interacts with	CCN4 (interacts with) FZD8	0	9606.ENSP00000250160	9606.ENSP00000363826	0	FALSE	interacts with	CCN4 (interacts with) FZD8
0.272	1358	0.09	0.309	0		0	0	0	interacts with	CCN4 (interacts with) DKK2	0	9606.ENSP00000250160	9606.ENSP00000285311	0	FALSE	interacts with	CCN4 (interacts with) DKK2
0.298	1360	0.049	0.303	0		0	0	0	interacts with	CCN4 (interacts with) NKD2	0	9606.ENSP00000250160	9606.ENSP00000296849	0	FALSE	interacts with	CCN4 (interacts with) NKD2
0.297	1362	0	0.297	0		0	0	0	interacts with	CCN4 (interacts with) WNT7A	0	9606.ENSP00000250160	9606.ENSP00000285018	0	FALSE	interacts with	CCN4 (interacts with) WNT7A
0.284	1364	0	0.284	0		0	0	0	interacts with	CCN4 (interacts with) WNT8B	0	9606.ENSP00000250160	9606.ENSP00000340677	0	FALSE	interacts with	CCN4 (interacts with) WNT8B
0.285	1366	0	0.284	0		0	0	0	interacts with	CCN4 (interacts with) FZD5	0	9606.ENSP00000250160	9606.ENSP00000354607	0	FALSE	interacts with	CCN4 (interacts with) FZD5
0.275	1368	0	0.275	0		0	0	0	interacts with	CCN4 (interacts with) WNT8A	0	9606.ENSP00000250160	9606.ENSP00000426653	0	FALSE	interacts with	CCN4 (interacts with) WNT8A
0.273	1370	0	0.273	0		0	0	0	interacts with	CCN4 (interacts with) SFRP5	0	9606.ENSP00000250160	9606.ENSP00000266066	0	FALSE	interacts with	CCN4 (interacts with) SFRP5
0.271	1372	0.044	0.273	0		0	0	0	interacts with	CCN4 (interacts with) FZD7	0	9606.ENSP00000250160	9606.ENSP00000286201	0	FALSE	interacts with	CCN4 (interacts with) FZD7
0.122	1374	0.181	0.25	0		0	0	0	interacts with	CCN4 (interacts with) ROR2	0	9606.ENSP00000250160	9606.ENSP00000364860	0	FALSE	interacts with	CCN4 (interacts with) ROR2
0.242	1376	0	0.242	0		0	0	0	interacts with	CCN4 (interacts with) NKD1	0	9606.ENSP00000250160	9606.ENSP00000268459	0	FALSE	interacts with	CCN4 (interacts with) NKD1
0.52	1312	0.047	0.523	0		0	0	0	interacts with	CCN4 (interacts with) DKK1	0	9606.ENSP00000250160	9606.ENSP00000363081	0	FALSE	interacts with	CCN4 (interacts with) DKK1
0.194	1378	0.092	0.236	0		0	0	0	interacts with	CCN4 (interacts with) WNT9B	0	9606.ENSP00000250160	9606.ENSP00000290015	0	FALSE	interacts with	CCN4 (interacts with) WNT9B
0.412	1314	0.195	0.507	0		0	0	0	interacts with	CCN4 (interacts with) WNT2	0	9606.ENSP00000250160	9606.ENSP00000265441	0	FALSE	interacts with	CCN4 (interacts with) WNT2
0.174	1380	0.087	0.214	0		0	0	0	interacts with	CCN4 (interacts with) PORCN	0	9606.ENSP00000250160	9606.ENSP00000322304	0	FALSE	interacts with	CCN4 (interacts with) PORCN
0.491	1316	0.07	0.506	0		0	0	0	interacts with	CCN4 (interacts with) FRZB	0	9606.ENSP00000250160	9606.ENSP00000295113	0	FALSE	interacts with	CCN4 (interacts with) FRZB
0.197	1382	0	0.197	0		0	0	0	interacts with	CCN4 (interacts with) VANGL2	0	9606.ENSP00000250160	9606.ENSP00000357040	0	FALSE	interacts with	CCN4 (interacts with) VANGL2
0.477	1318	0	0.477	0		0	0	0	interacts with	CCN4 (interacts with) RYK	0	9606.ENSP00000250160	9606.ENSP00000478721	0	FALSE	interacts with	CCN4 (interacts with) RYK
0.181	1384	0	0.181	0		0	0	0	interacts with	CCN4 (interacts with) DVL3	0	9606.ENSP00000250160	9606.ENSP00000316054	0	FALSE	interacts with	CCN4 (interacts with) DVL3
0.462	1320	0	0.462	0		0	0	0	interacts with	CCN4 (interacts with) LRP5	0	9606.ENSP00000250160	9606.ENSP00000294304	0	FALSE	interacts with	CCN4 (interacts with) LRP5
0.15	1386	0.072	0.177	0		0	0	0	interacts with	CCN4 (interacts with) WLS	0	9606.ENSP00000250160	9606.ENSP00000346829	0	FALSE	interacts with	CCN4 (interacts with) WLS
0.46	1322	0	0.46	0		0	0	0	interacts with	CCN4 (interacts with) WNT10B	0	9606.ENSP00000250160	9606.ENSP00000301061	0	FALSE	interacts with	CCN4 (interacts with) WNT10B
0.162	1388	0	0.161	0		0	0	0	interacts with	CCN4 (interacts with) NOTUM	0	9606.ENSP00000250160	9606.ENSP00000387310	0	FALSE	interacts with	CCN4 (interacts with) NOTUM
0.323	1324	0.214	0.445	0		0	0	0	interacts with	CCN4 (interacts with) SFRP4	0	9606.ENSP00000250160	9606.ENSP00000410715	0	FALSE	interacts with	CCN4 (interacts with) SFRP4
0.276	1390	0	0.276	0		0	0	0	interacts with	CCN4 (interacts with) FZD3	0	9606.ENSP00000250160	9606.ENSP00000240093	0	FALSE	interacts with	CCN4 (interacts with) FZD3
0.385	1326	0.097	0.421	0		0	0	0	interacts with	CCN4 (interacts with) SFRP2	0	9606.ENSP00000250160	9606.ENSP00000274063	0	FALSE	interacts with	CCN4 (interacts with) SFRP2

## Sheet: Data Dictionary
Variable	Description
automated_textmining	Interaction evidence derived from automated text mining of scientific literature.
BEND_MAP_ID	Unique identifier for nodes/edges in a network (specific to certain tools or databases).
coexpression	Interaction supported by gene coexpression data (e.g., genes with correlated expression across conditions).
combined_score	Aggregated confidence score for an interaction, combining multiple evidence sources (e.g., STRING database).
database_annotated	Indicates if the interaction is manually curated in a database (e.g., BioGRID, Reactome).
EdgeBetweenness	Measure of how many shortest paths pass through an edge. Identifies critical connections in the network.
experimentally_determined_interaction	Interaction confirmed by lab experiments (e.g., yeast two-hybrid, co-immunoprecipitation).
gene_fusion	Interaction inferred from gene fusion events (genes fused in genomes may functionally interact).
homology	Interaction inferred from homology (e.g., orthologous interactions in other species).
interaction	General term for a connection between two nodes (e.g., proteins, genes).
name	Label for the interaction (e.g., "EGFR-STAT3 interaction").
neighborhood_on_chromosome	Interaction inferred from genomic proximity (genes located near each other on a chromosome).
node1_string_id	STRING database identifier for the first node in the interaction (e.g., protein ID).
node2_string_id	STRING database identifier for the second node in the interaction.
phylogenetic_cooccurrence	Interaction inferred from co-evolution or phylogenetic profiles across species.
selected	Flag indicating if an interaction is selected (e.g., in visualization or analysis).
shared interaction	Default interaction identifier in tools like Cytoscape when no custom label is provided.
shared name	Default node/edge name in tools like Cytoscape if no custom identifier is assigned.
