# Supplementary material for: Comprehensive bioinformatics analysis reveals prognostic significance and immunological roles of WNT gene family in breast cancer
Source: Sci Rep. 2025 Oct 3;15:34490. doi: 10.1038/s41598-025-13315-6 (PMC12494856; doi:10.1038/s41598-025-13315-6)
Supplement: Supplementary file 4 — Supplementary Material 4. [file 41598_2025_13315_MOESM4_ESM.xlsx]

## Sheet: Results
Validation of prognostic WNTs using GEO and correlation analysis
Gene_ID	Gene_Symbol	Gene_Description	log2FoldChange	padj	Study
1	A1BG	alpha-1-B glycoprotein [Source:HGNC Symbol;Acc:HGNC:5]	0.331165	0.461366	GSE227679
10	NAT2	N-acetyltransferase 2 [Source:HGNC Symbol;Acc:HGNC:7646]	1.16986	0.619962	GSE227679
100	ADA	adenosine deaminase [Source:HGNC Symbol;Acc:HGNC:186]	0.544992	0.333517	GSE227679
1000	CDH2	cadherin 2 [Source:HGNC Symbol;Acc:HGNC:1759]	1.96895	0.0247782	GSE227679
10000	AKT3	AKT serine/threonine kinase 3 [Source:HGNC Symbol;Acc:HGNC:393]	-0.202463	0.690473	GSE227679
100008586	GAGE12F	G antigen 12F [Source:HGNC Symbol;Acc:HGNC:31906]	-0.0498054		GSE227679
100008587	RNA5-8SN5	RNA, 5.8S ribosomal N5 [Source:HGNC Symbol;Acc:HGNC:53533]	-0.795285	0.190143	GSE227679
100009676	ZBTB11-AS1	ZBTB11 antisense RNA 1 [Source:HGNC Symbol;Acc:HGNC:48573]	0.298212	0.247324	GSE227679
10001	MED6	mediator complex subunit 6 [Source:HGNC Symbol;Acc:HGNC:19970]	-0.06684	0.824372	GSE227679
10002	NR2E3	nuclear receptor subfamily 2 group E member 3 [Source:HGNC Symbol;Acc:HGNC:7974]	-0.235273	0.864905	GSE227679
10003	NAALAD2	N-acetylated alpha-linked acidic dipeptidase 2 [Source:HGNC Symbol;Acc:HGNC:14526]	-0.610226	0.266095	GSE227679
100033411	DUXB	double homeobox B [Source:HGNC Symbol;Acc:HGNC:33345]	-0.414064	0.797244	GSE227679
100033422	SNORD116-10	small nucleolar RNA, C/D box 116-10 [Source:HGNC Symbol;Acc:HGNC:33076]	-2.05446		GSE227679
100033423	SNORD116-11	small nucleolar RNA, C/D box 116-11 [Source:HGNC Symbol;Acc:HGNC:33077]	1.51555		GSE227679
100033437	SNORD115-2	small nucleolar RNA, C/D box 115-2 [Source:HGNC Symbol;Acc:HGNC:33021]			GSE227679
100033440	SNORD115-3	small nucleolar RNA, C/D box 115-3 [Source:HGNC Symbol;Acc:HGNC:33022]			GSE227679
100033441	SNORD115-4	small nucleolar RNA, C/D box 115-4 [Source:HGNC Symbol;Acc:HGNC:33023]	0		GSE227679
100033442	SNORD115-5	small nucleolar RNA, C/D box 115-5 [Source:HGNC Symbol;Acc:HGNC:33024]	2.1768		GSE227679
100033443	SNORD115-6	small nucleolar RNA, C/D box 115-6 [Source:HGNC Symbol;Acc:HGNC:33025]			GSE227679
100033444	SNORD115-7	small nucleolar RNA, C/D box 115-7 [Source:HGNC Symbol;Acc:HGNC:33026]			GSE227679
100033445	SNORD115-8	small nucleolar RNA, C/D box 115-8 [Source:HGNC Symbol;Acc:HGNC:33027]			GSE227679
100033446	SNORD115-9	small nucleolar RNA, C/D box 115-9 [Source:HGNC Symbol;Acc:HGNC:33028]			GSE227679
100033447	SNORD115-10	small nucleolar RNA, C/D box 115-10 [Source:HGNC Symbol;Acc:HGNC:33029]			GSE227679
100033448	SNORD115-11	small nucleolar RNA, C/D box 115-11 [Source:HGNC Symbol;Acc:HGNC:33030]			GSE227679
100033449	SNORD115-12	small nucleolar RNA, C/D box 115-12 [Source:HGNC Symbol;Acc:HGNC:33031]	-0.230141		GSE227679
100033450	SNORD115-13	small nucleolar RNA, C/D box 115-13 [Source:HGNC Symbol;Acc:HGNC:33032]	0.0343102		GSE227679
100033451	SNORD115-14	small nucleolar RNA, C/D box 115-14 [Source:HGNC Symbol;Acc:HGNC:33033]	0		GSE227679
100033453	SNORD115-15	small nucleolar RNA, C/D box 115-15 [Source:HGNC Symbol;Acc:HGNC:33034]	2.02948		GSE227679
100033454	SNORD115-16	small nucleolar RNA, C/D box 115-16 [Source:HGNC Symbol;Acc:HGNC:33035]			GSE227679
100033455	SNORD115-17	small nucleolar RNA, C/D box 115-17 [Source:HGNC Symbol;Acc:HGNC:33036]	0.130529		GSE227679
100033456	SNORD115-18	small nucleolar RNA, C/D box 115-18 [Source:HGNC Symbol;Acc:HGNC:33037]	1.13198		GSE227679
100033458	SNORD115-19	small nucleolar RNA, C/D box 115-19 [Source:HGNC Symbol;Acc:HGNC:33038]	1.8107		GSE227679
100033460	SNORD115-20	small nucleolar RNA, C/D box 115-20 [Source:HGNC Symbol;Acc:HGNC:33039]			GSE227679
100033603	SNORD115-21	small nucleolar RNA, C/D box 115-21 [Source:HGNC Symbol;Acc:HGNC:33040]	-0.590808		GSE227679
100033799	SNORD115-22	small nucleolar RNA, C/D box 115-22 [Source:HGNC Symbol;Acc:HGNC:33041]			GSE227679
100033800	SNORD115-23	small nucleolar RNA, C/D box 115-23 [Source:HGNC Symbol;Acc:HGNC:33042]			GSE227679
100033801	SNORD115-25	small nucleolar RNA, C/D box 115-25 [Source:HGNC Symbol;Acc:HGNC:33044]	1.56689		GSE227679
100033802	SNORD115-26	small nucleolar RNA, C/D box 115-26 [Source:HGNC Symbol;Acc:HGNC:33045]	0.671535		GSE227679
100033803	SNORD115-29	small nucleolar RNA, C/D box 115-29 [Source:HGNC Symbol;Acc:HGNC:33048]	2.07074		GSE227679
100033804	SNORD115-30	small nucleolar RNA, C/D box 115-30 [Source:HGNC Symbol;Acc:HGNC:33049]			GSE227679
100033805	SNORD115-31	small nucleolar RNA, C/D box 115-31 [Source:HGNC Symbol;Acc:HGNC:33050]			GSE227679
100033806	SNORD115-32	small nucleolar RNA, C/D box 115-32 [Source:HGNC Symbol;Acc:HGNC:33051]			GSE227679
100033807	SNORD115-33	small nucleolar RNA, C/D box 115-33 [Source:HGNC Symbol;Acc:HGNC:33052]	0		GSE227679
100033808	SNORD115-34	small nucleolar RNA, C/D box 115-34 [Source:HGNC Symbol;Acc:HGNC:33053]			GSE227679
100033809	SNORD115-35	small nucleolar RNA, C/D box 115-35 [Source:HGNC Symbol;Acc:HGNC:33054]			GSE227679
100033810	SNORD115-36	small nucleolar RNA, C/D box 115-36 [Source:HGNC Symbol;Acc:HGNC:33055]			GSE227679
100033811	SNORD115-37	small nucleolar RNA, C/D box 115-37 [Source:HGNC Symbol;Acc:HGNC:33056]	0.671535		GSE227679
100033812	SNORD115-38	small nucleolar RNA, C/D box 115-38 [Source:HGNC Symbol;Acc:HGNC:33057]	2.63106		GSE227679
100033813	SNORD115-39	small nucleolar RNA, C/D box 115-39 [Source:HGNC Symbol;Acc:HGNC:33058]			GSE227679
100033814	SNORD115-40	small nucleolar RNA, C/D box 115-40 [Source:HGNC Symbol;Acc:HGNC:33059]	0.4912		GSE227679
100033815	SNORD115-41	small nucleolar RNA, C/D box 115-41 [Source:HGNC Symbol;Acc:HGNC:33060]			GSE227679
100033816	SNORD115-42	small nucleolar RNA, C/D box 115-42 [Source:HGNC Symbol;Acc:HGNC:33061]	0.671535		GSE227679
100033817	SNORD115-43	small nucleolar RNA, C/D box 115-43 [Source:HGNC Symbol;Acc:HGNC:33062]			GSE227679
100033818	SNORD115-44	small nucleolar RNA, C/D box 115-44 [Source:HGNC Symbol;Acc:HGNC:33063]			GSE227679
100033819	MIR675	microRNA 675 [Source:HGNC Symbol;Acc:HGNC:33351]	0.381345	0.778378	GSE227679
100033822	SNORD115-48	small nucleolar RNA, C/D box 115-48 [Source:HGNC Symbol;Acc:HGNC:33343]			GSE227679
100036564	SNORD115-27	small nucleolar RNA, C/D box 115-27 [Source:HGNC Symbol;Acc:HGNC:33046]			GSE227679
100036565	SNORD115-28	small nucleolar RNA, C/D box 115-28 [Source:HGNC Symbol;Acc:HGNC:33047]	0.671535		GSE227679
100037417	DDTL	D-dopachrome tautomerase like [Source:HGNC Symbol;Acc:HGNC:33446]	-0.0418223	0.925107	GSE227679
100037417	DDT	D-dopachrome tautomerase [Source:HGNC Symbol;Acc:HGNC:2732]	-0.0418223	0.925107	GSE227679
100038246	TLX1NB	TLX1 neighbor [Source:HGNC Symbol;Acc:HGNC:37183]	3.06323		GSE227679
10004	NAALADL1	N-acetylated alpha-linked acidic dipeptidase like 1 [Source:HGNC Symbol;Acc:HGNC:23536]	-0.358631	0.464694	GSE227679
100048912	CDKN2B-AS1	CDKN2B antisense RNA 1 [Source:HGNC Symbol;Acc:HGNC:34341]	1.00283	0.266095	GSE227679
100049587	SIGLEC14	sialic acid binding Ig like lectin 14 [Source:HGNC Symbol;Acc:HGNC:32926]	0.585173	0.538869	GSE227679
100049716	NINJ2-AS1	NINJ2 antisense RNA 1 [Source:HGNC Symbol;Acc:HGNC:40405]	0.00367072	0.997337	GSE227679
10005	ACOT8	acyl-CoA thioesterase 8 [Source:HGNC Symbol;Acc:HGNC:15919]	-0.357477	0.169479	GSE227679
10006	ABI1	abl interactor 1 [Source:HGNC Symbol;Acc:HGNC:11320]	0.254888	0.121028	GSE227679
10007	GNPDA1	glucosamine-6-phosphate deaminase 1 [Source:HGNC Symbol;Acc:HGNC:4417]	0.371951	0.109431	GSE227679
100073347	MIMT1	MER1 repeat containing imprinted transcript 1 [Source:HGNC Symbol;Acc:HGNC:33464]	2.06688		GSE227679
10008	KCNE3	potassium voltage-gated channel subfamily E regulatory subunit 3 [Source:HGNC Symbol;Acc:HGNC:6243]	0.756861	0.113405	GSE227679
10009	ZBTB33	zinc finger and BTB domain containing 33 [Source:HGNC Symbol;Acc:HGNC:16682]	-0.00835208	0.988789	GSE227679
1001	CDH3	cadherin 3 [Source:HGNC Symbol;Acc:HGNC:1762]	-1.12008	0.208875	GSE227679
10010	TANK	TRAF family member associated NFKB activator [Source:HGNC Symbol;Acc:HGNC:11562]	-0.479805	0.0825516	GSE227679
100101116	TTTY1B	testis expressed transcript, Y-linked 1B [Source:HGNC Symbol;Acc:HGNC:37981]			GSE227679
100101118	TTTY8B	testis expressed transcript, Y-linked 8B [Source:HGNC Symbol;Acc:HGNC:37622]			GSE227679
100101120	TTTY7B	testis expressed transcript, Y-linked 7B [Source:HGNC Symbol;Acc:HGNC:37463]			GSE227679
100101121	TTTY23	testis expressed transcript, Y-linked 23 [Source:HGNC Symbol;Acc:HGNC:18847]			GSE227679
100101267	POM121C	POM121 transmembrane nucleoporin C [Source:HGNC Symbol;Acc:HGNC:34005]	-0.0750026	0.849132	GSE227679
100101467	ZSCAN30	zinc finger and SCAN domain containing 30 [Source:HGNC Symbol;Acc:HGNC:33517]	-0.242235	0.209489	GSE227679
10011	SRA1	steroid receptor RNA activator 1 [Source:HGNC Symbol;Acc:HGNC:11281]	0.263488	0.374922	GSE227679
100113379	SNORD121A	small nucleolar RNA, C/D box 121A [Source:HGNC Symbol;Acc:HGNC:33560]	1.52911	0.540428	GSE227679
100113380	SNORD125	small nucleolar RNA, C/D box 125 [Source:HGNC Symbol;Acc:HGNC:33564]	-0.133262	0.940241	GSE227679
100113386	UCKL1-AS1	UCKL1 antisense RNA 1 [Source:HGNC Symbol;Acc:HGNC:31967]	-0.71139	0.148654	GSE227679
100113403	LIN28B-AS1	LIN28B antisense RNA 1 [Source:HGNC Symbol;Acc:HGNC:21553]			GSE227679
100113404	LINC00583	long intergenic non-protein coding RNA 583 [Source:HGNC Symbol;Acc:HGNC:31437]			GSE227679
100113407	TMEM170B	transmembrane protein 170B [Source:HGNC Symbol;Acc:HGNC:34244]	-0.368736	0.500557	GSE227679
100124412	FAM138E	family with sequence similarity 138 member E [Source:HGNC Symbol;Acc:HGNC:32335]	-1.30182		GSE227679
100124534	SNORA84	small nucleolar RNA, H/ACA box 84 [Source:HGNC Symbol;Acc:HGNC:33615]	1.47361	0.142151	GSE227679
100124535	SNORA36C	small nucleolar RNA, H/ACA box 36C [Source:HGNC Symbol;Acc:HGNC:33616]	-1.34243		GSE227679
100124536	SNORA38B	small nucleolar RNA, H/ACA box 38B [Source:HGNC Symbol;Acc:HGNC:33617]	0.842153	0.453678	GSE227679
100124537	SNORA70B	small nucleolar RNA, H/ACA box 70B [Source:HGNC Symbol;Acc:HGNC:33618]	0.631825	0.74223	GSE227679
100124538	SNORA70C	small nucleolar RNA, H/ACA box 70C [Source:HGNC Symbol;Acc:HGNC:33619]	-1.74645		GSE227679
100124539	SNORA11B	small nucleolar RNA, H/ACA box 11B [Source:HGNC Symbol;Acc:HGNC:33620]	0.267849	0.896651	GSE227679
100124540	SNORA11C	small nucleolar RNA, H/ACA box 11C [Source:HGNC Symbol;Acc:HGNC:33621]	0.130529		GSE227679
100124541	SNORA11D	small nucleolar RNA, H/ACA box 11D [Source:HGNC Symbol;Acc:HGNC:33622]	0.00346666		GSE227679
100124700	HOTAIR	HOX transcript antisense RNA [Source:HGNC Symbol;Acc:HGNC:33510]	2.30494	0.208904	GSE227679
100125288	ZGLP1	zinc finger GATA like protein 1 [Source:HGNC Symbol;Acc:HGNC:37245]	-0.532381	0.610871	GSE227679
100125556	FAM86JP	family with sequence similarity 86 member J, pseudogene [Source:HGNC Symbol;Acc:HGNC:44097]	0.558762	0.474016	GSE227679
100126270	FMR1-AS1	FMR1 antisense RNA 1 [Source:HGNC Symbol;Acc:HGNC:39081]	0.105317	0.977092	GSE227679
100126296	MIR298	microRNA 298 [Source:HGNC Symbol;Acc:HGNC:33634]	1.64793		GSE227679
100126297	MIR300	microRNA 300 [Source:HGNC Symbol;Acc:HGNC:33636]	-0.283683		GSE227679
100126301	MIR509-2	microRNA 509-2 [Source:HGNC Symbol;Acc:HGNC:33641]			GSE227679
100126302	MIR450B	microRNA 450b [Source:HGNC Symbol;Acc:HGNC:33642]			GSE227679
100126303	MIR890	microRNA 890 [Source:HGNC Symbol;Acc:HGNC:33644]			GSE227679
100126304	MIR891B	microRNA 891b [Source:HGNC Symbol;Acc:HGNC:33645]			GSE227679
100126306	MIR888	microRNA 888 [Source:HGNC Symbol;Acc:HGNC:33648]			GSE227679
100126307	MIR892B	microRNA 892b [Source:HGNC Symbol;Acc:HGNC:33649]			GSE227679
100126308	MIR541	microRNA 541 [Source:HGNC Symbol;Acc:HGNC:33650]	-1.38965		GSE227679
100126309	MIR875	microRNA 875 [Source:HGNC Symbol;Acc:HGNC:33652]	0.732715	0.703576	GSE227679
100126310	MIR876	microRNA 876 [Source:HGNC Symbol;Acc:HGNC:33653]			GSE227679
100126311	MIR147B	microRNA 147b [Source:HGNC Symbol;Acc:HGNC:33655]	0.979417	0.490421	GSE227679
100126313	MIR744	microRNA 744 [Source:HGNC Symbol;Acc:HGNC:33658]	-0.708166	0.555654	GSE227679
100126314	MIR877	microRNA 877 [Source:HGNC Symbol;Acc:HGNC:33660]	-0.438656	0.8318	GSE227679
100126315	MIR665	microRNA 665 [Source:HGNC Symbol;Acc:HGNC:33662]	2.2365		GSE227679
100126316	MIR873	microRNA 873 [Source:HGNC Symbol;Acc:HGNC:33663]			GSE227679
100126317	MIR374B	microRNA 374b [Source:HGNC Symbol;Acc:HGNC:33665]	-0.124695	0.871808	GSE227679
100126318	MIR301B	microRNA 301b [Source:HGNC Symbol;Acc:HGNC:33667]	-0.0498054		GSE227679
100126319	MIR216B	microRNA 216b [Source:HGNC Symbol;Acc:HGNC:33668]			GSE227679
100126320	MIR920	microRNA 920 [Source:HGNC Symbol;Acc:HGNC:33670]	-0.279519	0.879393	GSE227679
100126321	MIR922	microRNA 922 [Source:HGNC Symbol;Acc:HGNC:33672]	0.769821	0.127323	GSE227679
100126323	MIR924	microRNA 924 [Source:HGNC Symbol;Acc:HGNC:33674]	-0.0498022		GSE227679
100126324	MIR934	microRNA 934 [Source:HGNC Symbol;Acc:HGNC:33677]			GSE227679
100126325	MIR935	microRNA 935 [Source:HGNC Symbol;Acc:HGNC:33678]	-0.230141		GSE227679
100126326	MIR936	microRNA 936 [Source:HGNC Symbol;Acc:HGNC:33679]	-2.31295	0.0130752	GSE227679
100126327	MIR938	microRNA 938 [Source:HGNC Symbol;Acc:HGNC:33681]	0.235532	0.917479	GSE227679
100126328	MIR940	microRNA 940 [Source:HGNC Symbol;Acc:HGNC:33683]	0.734608		GSE227679
100126329	MIR941-1	microRNA 941-1 [Source:HGNC Symbol;Acc:HGNC:33684]	0.716497	0.64546	GSE227679
100126330	MIR941-4	microRNA 941-4 [Source:HGNC Symbol;Acc:HGNC:33687]	-0.864049		GSE227679
100126331	MIR942	microRNA 942 [Source:HGNC Symbol;Acc:HGNC:33688]	1.32822		GSE227679
100126332	MIR943	microRNA 943 [Source:HGNC Symbol;Acc:HGNC:33689]	-0.917235	0.122526	GSE227679
100126333	MIR708	microRNA 708 [Source:HGNC Symbol;Acc:HGNC:33654]	-0.994198		GSE227679
100126334	MIR885	microRNA 885 [Source:HGNC Symbol;Acc:HGNC:33659]			GSE227679
100126335	MIR543	microRNA 543 [Source:HGNC Symbol;Acc:HGNC:33664]	1.01437		GSE227679
100126336	MIR208B	microRNA 208b [Source:HGNC Symbol;Acc:HGNC:33669]			GSE227679
100126337	MIR509-3	microRNA 509-3 [Source:HGNC Symbol;Acc:HGNC:33675]			GSE227679
100126338	MIR937	microRNA 937 [Source:HGNC Symbol;Acc:HGNC:33680]	0.00354783	0.997337	GSE227679
100126339	MIR941-2	microRNA 941-2 [Source:HGNC Symbol;Acc:HGNC:33685]	-0.591889		GSE227679
100126340	MIR944	microRNA 944 [Source:HGNC Symbol;Acc:HGNC:33690]	-2.38976		GSE227679
100126341	MIR891A	microRNA 891a [Source:HGNC Symbol;Acc:HGNC:33635]			GSE227679
100126342	MIR892A	microRNA 892a [Source:HGNC Symbol;Acc:HGNC:33639]			GSE227679
100126343	MIR874	microRNA 874 [Source:HGNC Symbol;Acc:HGNC:33643]	-3.94522		GSE227679
100126345	MIR889	microRNA 889 [Source:HGNC Symbol;Acc:HGNC:33651]	-2.54472		GSE227679
100126346	MIR190B	microRNA 190b [Source:HGNC Symbol;Acc:HGNC:33656]			GSE227679
100126347	MIR887	microRNA 887 [Source:HGNC Symbol;Acc:HGNC:33661]	1.19086	0.613101	GSE227679
100126348	MIR760	microRNA 760 [Source:HGNC Symbol;Acc:HGNC:33666]	-0.590808		GSE227679
100126349	MIR921	microRNA 921 [Source:HGNC Symbol;Acc:HGNC:33671]	-1.4724		GSE227679
100126350	MIR933	microRNA 933 [Source:HGNC Symbol;Acc:HGNC:33676]	0.111664	0.966067	GSE227679
100126351	MIR939	microRNA 939 [Source:HGNC Symbol;Acc:HGNC:33682]	0.0948861	0.918223	GSE227679
100126352	MIR941-3	microRNA 941-3 [Source:HGNC Symbol;Acc:HGNC:33686]	-0.7752		GSE227679
100126354	MIR297	microRNA 297 [Source:HGNC Symbol;Acc:HGNC:33691]			GSE227679
100126355	MIR365A	microRNA 365a [Source:HGNC Symbol;Acc:HGNC:33692]	-0.198283	0.959087	GSE227679
100126356	MIR365B	microRNA 365b [Source:HGNC Symbol;Acc:HGNC:33693]	-0.607004	0.653224	GSE227679
100126572	GJE1	gap junction protein epsilon 1 [Source:HGNC Symbol;Acc:HGNC:33251]	-1.0453		GSE227679
100126791	EGOT	eosinophil granule ontogeny transcript [Source:HGNC Symbol;Acc:HGNC:37129]	-0.676286	0.334935	GSE227679
100126793	GHRLOS	ghrelin opposite strand/antisense RNA [Source:HGNC Symbol;Acc:HGNC:33885]	-0.310569	0.365924	GSE227679
100127206	MINAR2	membrane integral NOTCH2 associated receptor 2 [Source:HGNC Symbol;Acc:HGNC:33914]	-2.69901		GSE227679
100127888	SLCO4A1-AS1	SLCO4A1 antisense RNA 1 [Source:HGNC Symbol;Acc:HGNC:40537]	-1.18396	0.203763	GSE227679
100127950	HECW1-IT1	HECW1 intronic transcript 1 [Source:HGNC Symbol;Acc:HGNC:41465]	0.784406		GSE227679
100127967	KRT73-AS1	KRT73 antisense RNA 1 [Source:HGNC Symbol;Acc:HGNC:49607]	0.130529		GSE227679
100127983	C8orf88	chromosome 8 open reading frame 88 [Source:HGNC Symbol;Acc:HGNC:44672]	-1.16404	0.00538224	GSE227679
100128006	ARHGAP44-AS1	ARHGAP44 and MYOCD antisense RNA 1 [Source:HGNC Symbol;Acc:HGNC:55326]	-0.90483	0.604675	GSE227679
100128025	WWTR1-AS1	WWTR1 antisense RNA 1 [Source:HGNC Symbol;Acc:HGNC:41035]	-1.23948	0.427375	GSE227679
100128071	FAM229A	family with sequence similarity 229 member A [Source:HGNC Symbol;Acc:HGNC:44652]	-1.75753	0.0585879	GSE227679
100128108	UBE2Q2P13	UBE2Q2 pseudogene 13 [Source:HGNC Symbol;Acc:HGNC:56078]	-0.392348	0.645233	GSE227679
100128126	STAU2-AS1	STAU2 antisense RNA 1 [Source:HGNC Symbol;Acc:HGNC:44101]	-1.03192	0.566161	GSE227679
100128139	LINC01233	long intergenic non-protein coding RNA 1233 [Source:HGNC Symbol;Acc:HGNC:49756]	-2.32497		GSE227679
100128164	FHL1P1	FHL1 pseudogene 1 [Source:HGNC Symbol;Acc:HGNC:56632]	0.153139	0.964065	GSE227679
100128191	TMPO-AS1	TMPO antisense RNA 1 [Source:HGNC Symbol;Acc:HGNC:44158]	-0.0540553	0.941221	GSE227679
100128239	LINC02731	long intergenic non-protein coding RNA 2731 [Source:HGNC Symbol;Acc:HGNC:54248]	-0.375988	0.799841	GSE227679
100128252	ZNF667-AS1	ZNF667 antisense RNA 1 (head to head) [Source:HGNC Symbol;Acc:HGNC:44321]	-0.51683	0.254702	GSE227679
100128260	WASIR1	WASH and IL9R antisense RNA 1 [Source:HGNC Symbol;Acc:HGNC:38513]	1.81027	0.28979	GSE227679
100128264	HTR5A-AS1	HTR5A antisense RNA 1 [Source:HGNC Symbol;Acc:HGNC:48956]			GSE227679
100128327	TRAPPC3L	trafficking protein particle complex subunit 3L [Source:HGNC Symbol;Acc:HGNC:21090]	1.70339	0.445122	GSE227679
100128385	FAM225B	family with sequence similarity 225 member B [Source:HGNC Symbol;Acc:HGNC:21865]	0.0427386	0.952776	GSE227679
100128386	ARHGAP42-AS1	ARHGAP42 antisense RNA 1 [Source:HGNC Symbol;Acc:HGNC:54801]	0.578817	0.489154	GSE227679
100128398	ZNF606-AS1	ZNF606 antisense RNA 1 [Source:HGNC Symbol;Acc:HGNC:44322]	-0.243368	0.673986	GSE227679
100128420	LINC00892	long intergenic non-protein coding RNA 892 [Source:HGNC Symbol;Acc:HGNC:48578]	0.488851	0.829748	GSE227679
100128505	ASTN2-AS1	ASTN2 antisense RNA 1 [Source:HGNC Symbol;Acc:HGNC:51175]	0.438929	0.711655	GSE227679
100128531	KIAA1671-AS1	KIAA1671 antisense RNA 1 [Source:HGNC Symbol;Acc:HGNC:41238]	-0.707384	0.0438638	GSE227679
100128553	CTAGE4	CTAGE family member 4 [Source:HGNC Symbol;Acc:HGNC:24772]	-0.408057	0.403644	GSE227679
100128554	LINC02347	long intergenic non-protein coding RNA 2347 [Source:HGNC Symbol;Acc:HGNC:53269]	2.32683		GSE227679
100128560	MYHAS	myosin heavy chain gene cluster antisense RNA [Source:HGNC Symbol;Acc:HGNC:50609]	-0.646341	0.431862	GSE227679
100128568	RANBP3-DT	RANBP3 divergent transcript [Source:HGNC Symbol;Acc:HGNC:55312]	-0.716063	0.592161	GSE227679
100128569	TEKTIP1	tektin bundle interacting protein 1 [Source:HGNC Symbol;Acc:HGNC:34496]	-0.100466	0.895969	GSE227679
100128640	ACVR2B-AS1	ACVR2B antisense RNA 1 [Source:HGNC Symbol;Acc:HGNC:44161]	-0.539495	0.363904	GSE227679
100128675	HPN-AS1	HPN antisense RNA 1 [Source:HGNC Symbol;Acc:HGNC:47041]	1.72927	0.0557979	GSE227679
100128682	LINC01531	long intergenic non-protein coding RNA 1531 [Source:HGNC Symbol;Acc:HGNC:51270]	-0.958654		GSE227679
100128688	GPR50-AS1	GPR50 antisense RNA 1 [Source:HGNC Symbol;Acc:HGNC:40259]			GSE227679
100128714	LINC02346	long intergenic non-protein coding RNA 2346 [Source:HGNC Symbol;Acc:HGNC:53268]	0		GSE227679
100128731	OST4	oligosaccharyltransferase complex subunit 4, non-catalytic [Source:HGNC Symbol;Acc:HGNC:32483]	0.284696	0.512733	GSE227679
100128750	RBPMS-AS1	RBPMS antisense RNA 1 [Source:HGNC Symbol;Acc:HGNC:48721]	-0.994259	0.0202101	GSE227679
100128782	ERCC6L2-AS1	ERCC6L2 antisense RNA 1 [Source:HGNC Symbol;Acc:HGNC:27858]	-0.534241	0.124864	GSE227679
100128788	SRRM2-AS1	SRRM2 antisense RNA 1 [Source:HGNC Symbol;Acc:HGNC:44162]	0.805778	0.055032	GSE227679
100128881	VPS9D1-AS1	VPS9D1 antisense RNA 1 [Source:HGNC Symbol;Acc:HGNC:48915]	-0.474002	0.300124	GSE227679
100128882	ZFPM1-AS1	ZFPM1 antisense RNA 1 [Source:HGNC Symbol;Acc:HGNC:55351]	-0.731473	0.480952	GSE227679
100128893	GATA6-AS1	GATA6 antisense RNA 1 (head to head) [Source:HGNC Symbol;Acc:HGNC:48840]	-0.0165417	0.99538	GSE227679
100128905	LINC01960	long intergenic non-protein coding RNA 1960 [Source:HGNC Symbol;Acc:HGNC:52785]	-1.28635		GSE227679
100128908	CIROP	ciliated left-right organizer metallopeptidase [Source:HGNC Symbol;Acc:HGNC:53647]	-0.0921308	0.955062	GSE227679
100128927	ZBTB42	zinc finger and BTB domain containing 42 [Source:HGNC Symbol;Acc:HGNC:32550]	0.772502	0.0464626	GSE227679
100128946	LINC01310	long intergenic non-protein coding RNA 1310 [Source:HGNC Symbol;Acc:HGNC:50501]	-5.59271		GSE227679
100128966	FAM53C	family with sequence similarity 53 member C [Source:HGNC Symbol;Acc:HGNC:1336]	0.879973		GSE227679
100129029	PKP4-AS1	PKP4 antisense RNA 1 [Source:HGNC Symbol;Acc:HGNC:52580]	-0.193269	0.553251	GSE227679
100129060	SEMA3F-AS1	SEMA3F antisense RNA 1 [Source:HGNC Symbol;Acc:HGNC:40518]	-0.257458	0.466364	GSE227679
100129066	LINC03062	long intergenic non-protein coding RNA 3062 [Source:HGNC Symbol;Acc:HGNC:56369]	0.619987	0.828098	GSE227679
100129075	KTN1-AS1	KTN1 antisense RNA 1 [Source:HGNC Symbol;Acc:HGNC:19842]	0.108878	0.911404	GSE227679
100129128	KHDC1L	KH domain containing 1 like [Source:HGNC Symbol;Acc:HGNC:37274]	1.95959		GSE227679
100129129	TDH-AS1	TDH antisense RNA 1 [Source:HGNC Symbol;Acc:HGNC:55510]	1.35466		GSE227679
100129195	ZSCAN16-AS1	ZSCAN16 antisense RNA 1 [Source:HGNC Symbol;Acc:HGNC:48982]	0.0247139	0.964388	GSE227679
100129196	MATN1-AS1	MATN1 antisense RNA 1 [Source:HGNC Symbol;Acc:HGNC:40364]	-1.22344	0.0384479	GSE227679
100129203	LNCRNA-IUR	lncRNA imatinib upregulated [Source:HGNC Symbol;Acc:HGNC:55755]	-0.235857	0.837228	GSE227679
100129213	SLC39A12-AS1	SLC39A12 antisense RNA 1 [Source:HGNC Symbol;Acc:HGNC:44881]	0.261288		GSE227679
100129216	DEFB131B	defensin beta 131B [Source:HGNC Symbol;Acc:HGNC:38058]	-0.144541	0.918487	GSE227679
100129239	CXorf51A	chromosome X open reading frame 51A [Source:HGNC Symbol;Acc:HGNC:30533]			GSE227679
100129250	SMIM27	small integral membrane protein 27 [Source:HGNC Symbol;Acc:HGNC:31420]	-0.22682	0.493804	GSE227679
100129271	KPLCE	KPRP N-terminal and LCE C-terminal like protein [Source:HGNC Symbol;Acc:HGNC:29468]			GSE227679
100129278	TDRD15	tudor domain containing 15 [Source:HGNC Symbol;Acc:HGNC:45037]	1.13384	0.650756	GSE227679
100129347	LINC00484	long intergenic non-protein coding RNA 484 [Source:HGNC Symbol;Acc:HGNC:27862]	-0.449466	0.718424	GSE227679
100129361	SMIM10L1	small integral membrane protein 10 like 1 [Source:HGNC Symbol;Acc:HGNC:49847]	0.0434593	0.92732	GSE227679
100129385	LINC03041	long intergenic non-protein coding RNA 3041 [Source:HGNC Symbol;Acc:HGNC:19054]	-1.20348		GSE227679
100129396	FAM106C	family with sequence similarity 106 member C [Source:HGNC Symbol;Acc:HGNC:38396]	-0.12329	0.940147	GSE227679
100129407	FAM236A	family with sequence similarity 236 member A [Source:HGNC Symbol;Acc:HGNC:44268]	-1.93289		GSE227679
100129427	DDC-AS1	DDC antisense RNA 1 [Source:HGNC Symbol;Acc:HGNC:40171]			GSE227679
100129461	LYRM4-AS1	LYRM4 antisense RNA 1 [Source:HGNC Symbol;Acc:HGNC:52055]	0.223683	0.591735	GSE227679
100129480	MKRN2OS	MKRN2 opposite strand [Source:HGNC Symbol;Acc:HGNC:40375]	-0.159785	0.802314	GSE227679
100129482	ZNF37BP	zinc finger protein 37B, pseudogene [Source:HGNC Symbol;Acc:HGNC:13103]	-0.360493	0.295768	GSE227679
100129484	LINC02983	long intergenic non-protein coding RNA 2983 [Source:HGNC Symbol;Acc:HGNC:56060]	0.336423	0.633582	GSE227679
100129515	ETDB	embryonic testis differentiation homolog B [Source:HGNC Symbol;Acc:HGNC:44269]	-0.275973	0.875307	GSE227679
100129518	SOD2-OT1	SOD2 overlapping transcript 1 [Source:HGNC Symbol;Acc:HGNC:53445]	-0.128752	0.861878	GSE227679
100129520	TEX13C	TEX13 family member C [Source:HGNC Symbol;Acc:HGNC:52277]	1.55006		GSE227679
100129543	ZNF730	zinc finger protein 730 [Source:HGNC Symbol;Acc:HGNC:32470]	0.789988	0.181711	GSE227679
100129550	LINC02035	long intergenic non-protein coding RNA 2035 [Source:HGNC Symbol;Acc:HGNC:52875]	0.060313	0.878153	GSE227679
100129583	FAM47E	family with sequence similarity 47 member E [Source:HGNC Symbol;Acc:HGNC:34343]	-0.371901	0.516241	GSE227679
100129597	LINC00462	long intergenic non-protein coding RNA 462 [Source:HGNC Symbol;Acc:HGNC:42811]	1.03379		GSE227679
100129620	PLPPR5-AS1	PLPPR5 antisense RNA 1 [Source:HGNC Symbol;Acc:HGNC:55720]	2.74683		GSE227679
100129654	TCF24	transcription factor 24 [Source:HGNC Symbol;Acc:HGNC:32275]	0.693405		GSE227679
100129662	FGF13-AS1	FGF13 antisense RNA 1 [Source:HGNC Symbol;Acc:HGNC:44264]	-0.0514925	0.979696	GSE227679
100129669	IZUMO3	IZUMO family member 3 [Source:HGNC Symbol;Acc:HGNC:31421]	2.8935		GSE227679
100129716	ARRDC3-AS1	ARRDC3 antisense RNA 1 [Source:HGNC Symbol;Acc:HGNC:44145]	-0.641099	0.0187616	GSE227679
100129722	STPG3-AS1	STPG3 antisense RNA 1 [Source:HGNC Symbol;Acc:HGNC:51176]	0.0589683	0.97706	GSE227679
100129724	MAPRE3-AS1	MAPRE3 antisense RNA 1 [Source:HGNC Symbol;Acc:HGNC:40362]	-1.3809	0.126953	GSE227679
100129781	MIR193BHG	MIR193b-365a host gene [Source:HGNC Symbol;Acc:HGNC:51945]	0.410959	0.739194	GSE227679
100129792	CCDC152	coiled-coil domain containing 152 [Source:HGNC Symbol;Acc:HGNC:34438]	-0.0839518	0.911542	GSE227679
100129794	SLC25A21-AS1	SLC25A21 antisense RNA 1 [Source:HGNC Symbol;Acc:HGNC:44298]	0.0948087	0.910409	GSE227679
100129827	IRAG1-AS1	IRAG1 antisense RNA 1 [Source:HGNC Symbol;Acc:HGNC:43434]	-0.282469	0.786267	GSE227679
100129836	COL4A2-AS2	COL4A2 antisense RNA 2 [Source:HGNC Symbol;Acc:HGNC:39849]	0.179753	0.849627	GSE227679
100129842	ZNF737	zinc finger protein 737 [Source:HGNC Symbol;Acc:HGNC:32468]	0.557495	0.206789	GSE227679
100129845	PCOLCE-AS1	PCOLCE antisense RNA 1 [Source:HGNC Symbol;Acc:HGNC:40430]	0.326647	0.535085	GSE227679
100129858	SCOC-AS1	SCOC antisense RNA 1 [Source:HGNC Symbol;Acc:HGNC:50601]	-0.308295	0.832656	GSE227679
100129878	DYM-AS1	DYM antisense RNA 1 [Source:HGNC Symbol;Acc:HGNC:37046]	-0.636922	0.724453	GSE227679
100129917	PCGF3-AS1	PCGF3 antisense RNA 1 [Source:HGNC Symbol;Acc:HGNC:56108]	0.039109	0.956979	GSE227679
100129924	TMEM269	transmembrane protein 269 [Source:HGNC Symbol;Acc:HGNC:52381]	0.567379	0.662705	GSE227679
100129940	HMGA2-AS1	HMGA2 antisense RNA 1 [Source:HGNC Symbol;Acc:HGNC:53973]	0.903618	0.188603	GSE227679
100129969	SPATA31F3	SPATA31 subfamily F member 3 [Source:HGNC Symbol;Acc:HGNC:42673]	-0.91729	0.520243	GSE227679
100129995	LINC01460	long intergenic non-protein coding RNA 1460 [Source:HGNC Symbol;Acc:HGNC:50858]	-2.56922	0.248182	GSE227679
10013	HDAC6	histone deacetylase 6 [Source:HGNC Symbol;Acc:HGNC:14064]	-0.0991055	0.711655	GSE227679
100130017	FTLP10	ferritin light chain pseudogene 10 [Source:HGNC Symbol;Acc:HGNC:37959]	-0.410475		GSE227679
100130086	HSFX2	heat shock transcription factor family, X-linked 2 [Source:HGNC Symbol;Acc:HGNC:32701]	-0.45935	0.514883	GSE227679
100130111	LCIIAR	lung cancer immune cell infiltration associated lncRNA [Source:HGNC Symbol;Acc:HGNC:56346]	0.0622136		GSE227679
100130148	MAPT-IT1	MAPT intronic transcript 1 [Source:HGNC Symbol;Acc:HGNC:43741]	1.44076	0.188091	GSE227679
100130197	EFCAB14-AS1	EFCAB14 antisense RNA 1 [Source:HGNC Symbol;Acc:HGNC:44108]	0.204892	0.512621	GSE227679
100130207	SUMF1	sulfatase modifying factor 1 [Source:HGNC Symbol;Acc:HGNC:20376]	-0.621334	0.191737	GSE227679
100130231	LINC00861	long intergenic non-protein coding RNA 861 [Source:HGNC Symbol;Acc:HGNC:45133]	0.582039	0.600067	GSE227679
100130249	LINC02961	long intergenic non-protein coding RNA 2961 [Source:HGNC Symbol;Acc:HGNC:55986]	0.4912		GSE227679
100130264	SLC24A3-AS1	SLC24A3 antisense RNA 1 [Source:HGNC Symbol;Acc:HGNC:40540]	-0.0522268	0.971136	GSE227679
100130268	CAPS2-AS1	CAPS2 antisense RNA 1 [Source:HGNC Symbol;Acc:HGNC:40769]			GSE227679
100130274	CCDC166	coiled-coil domain containing 166 [Source:HGNC Symbol;Acc:HGNC:41910]	1.22049		GSE227679
100130301	C8orf89	chromosome 8 open reading frame 89 [Source:HGNC Symbol;Acc:HGNC:51258]	-0.241313	0.926518	GSE227679
100130302	SUPT20HL1	SUPT20H like 1 [Source:HGNC Symbol;Acc:HGNC:30773]	-0.374676	0.893187	GSE227679
100130311	C17orf107	chromosome 17 open reading frame 107 [Source:HGNC Symbol;Acc:HGNC:37238]	-0.699209	0.113776	GSE227679
100130348	TMEM262	transmembrane protein 262 [Source:HGNC Symbol;Acc:HGNC:49389]	0.280484	0.56844	GSE227679
100130361	CXorf49	chromosome X open reading frame 49 [Source:HGNC Symbol;Acc:HGNC:30891]	-2.46224		GSE227679
100130386	LINC00552	long intergenic non-protein coding RNA 552 [Source:HGNC Symbol;Acc:HGNC:43692]	2.21143		GSE227679
100130417	LINC02593	long intergenic non-protein coding RNA 2593 [Source:HGNC Symbol;Acc:HGNC:53933]	1.39754	0.169479	GSE227679
100130449	GPC1-AS1	GPC1 antisense RNA 1 [Source:HGNC Symbol;Acc:HGNC:56102]	1.07662	0.249294	GSE227679
100130480	LINC01387	long intergenic non-protein coding RNA 1387 [Source:HGNC Symbol;Acc:HGNC:44660]	0		GSE227679
100130519	TMEM221	transmembrane protein 221 [Source:HGNC Symbol;Acc:HGNC:21943]	-0.853362	0.507493	GSE227679
100130520	CD300H	CD300H molecule (gene/pseudogene) [Source:HGNC Symbol;Acc:HGNC:52292]	-0.57554		GSE227679
100130522	PARD6G-AS1	PARD6G antisense RNA 1 [Source:HGNC Symbol;Acc:HGNC:44109]	-0.355763	0.647337	GSE227679
100130613	PRR32	proline rich 32 [Source:HGNC Symbol;Acc:HGNC:34498]			GSE227679
100130705	SPMIP1	sperm microtubule inner protein 1 [Source:HGNC Symbol;Acc:HGNC:52392]	0.338954	0.724552	GSE227679
100130717	HDHD5-AS1	HDHD5 antisense RNA 1 [Source:HGNC Symbol;Acc:HGNC:1842]	-0.753332	0.583995	GSE227679
100130733	LRRC70	leucine rich repeat containing 70 [Source:HGNC Symbol;Acc:HGNC:35155]	-0.206706	0.785033	GSE227679
100130742	LRRC69	leucine rich repeat containing 69 [Source:HGNC Symbol;Acc:HGNC:34303]	0.467386	0.597044	GSE227679
100130771	EFCAB10	EF-hand calcium binding domain 10 [Source:HGNC Symbol;Acc:HGNC:34531]	0.267796	0.530086	GSE227679
100130776	AGAP2-AS1	AGAP2 antisense RNA 1 [Source:HGNC Symbol;Acc:HGNC:48633]	-0.153022	0.794946	GSE227679
100130827	SBK3	SH3 domain binding kinase family member 3 [Source:HGNC Symbol;Acc:HGNC:44121]	-1.26867		GSE227679
100130880	CREB3L2-AS1	CREB3L2 antisense RNA 1 [Source:HGNC Symbol;Acc:HGNC:41030]	-0.0458866	0.965677	GSE227679
100130890	TSTD3	thiosulfate sulfurtransferase like domain containing 3 [Source:HGNC Symbol;Acc:HGNC:40910]	-0.177503	0.543679	GSE227679
100130894	VAC14-AS1	VAC14 antisense RNA 1 [Source:HGNC Symbol;Acc:HGNC:48605]	-0.241634	0.626734	GSE227679
100130933	SMIM6	small integral membrane protein 6 [Source:HGNC Symbol;Acc:HGNC:40032]	-0.0794126	0.954202	GSE227679
100130950	ZNF594-DT	ZNF594 divergent transcript [Source:HGNC Symbol;Acc:HGNC:55347]	-0.181169	0.617874	GSE227679
100130954	LINC01502	long intergenic non-protein coding RNA 1502 [Source:HGNC Symbol;Acc:HGNC:51183]	-0.770436		GSE227679
100130958	SYCE1L	synaptonemal complex central element protein 1 like [Source:HGNC Symbol;Acc:HGNC:37236]	-0.474902	0.200434	GSE227679
100130967	LINC02901	long intergenic non-protein coding RNA 2901 [Source:HGNC Symbol;Acc:HGNC:21179]	0.83832	0.545789	GSE227679
100130988	SPMIP7	sperm microtubule inner protein 7 [Source:HGNC Symbol;Acc:HGNC:22564]			GSE227679
100131017	ZNF316	zinc finger protein 316 [Source:HGNC Symbol;Acc:HGNC:13843]	-0.24009	0.463859	GSE227679
100131067	CKMT2-AS1	CKMT2 antisense RNA 1 [Source:HGNC Symbol;Acc:HGNC:48997]	-0.329685	0.340457	GSE227679
100131089	SRP14-DT	SRP14 divergent transcript [Source:HGNC Symbol;Acc:HGNC:48619]	-0.367081	0.524423	GSE227679
100131094	DPP9-AS1	DPP9 antisense RNA 1 [Source:HGNC Symbol;Acc:HGNC:50706]	0.376744	0.161529	GSE227679
100131117	ZBTB20-AS1	ZBTB20 antisense RNA 1 [Source:HGNC Symbol;Acc:HGNC:40640]	-0.281883	0.445464	GSE227679
100131137	BSPH1	binder of sperm protein homolog 1 [Source:HGNC Symbol;Acc:HGNC:33906]			GSE227679
100131138	LINC01405	long intergenic non-protein coding RNA 1405 [Source:HGNC Symbol;Acc:HGNC:50688]	1.06282		GSE227679
100131187	TSTD1	thiosulfate sulfurtransferase like domain containing 1 [Source:HGNC Symbol;Acc:HGNC:35410]	0.395383	0.478973	GSE227679
100131193	CCDC183-AS1	CCDC183 antisense RNA 1 [Source:HGNC Symbol;Acc:HGNC:44105]	0.0585453	0.949086	GSE227679
100131211	NEMP2	nuclear envelope integral membrane protein 2 [Source:HGNC Symbol;Acc:HGNC:33700]	-0.43656	0.106975	GSE227679
100131213	ZNF503-AS2	ZNF503 antisense RNA 2 [Source:HGNC Symbol;Acc:HGNC:23525]	0.313429	0.804072	GSE227679
100131244	ANKRD63	ankyrin repeat domain 63 [Source:HGNC Symbol;Acc:HGNC:40027]	-3.81433		GSE227679
100131303	DPEP2NB	DPEP2 neighbor [Source:HGNC Symbol;Acc:HGNC:52385]	-0.771144		GSE227679
100131315	GREM1-AS1	GREM1 antisense RNA 1 [Source:HGNC Symbol;Acc:HGNC:55411]	2.16763		GSE227679
100131366	LINC00605	long intergenic non-protein coding RNA 605 [Source:HGNC Symbol;Acc:HGNC:43928]	3.78626		GSE227679
100131378	C11orf91	chromosome 11 open reading frame 91 [Source:HGNC Symbol;Acc:HGNC:34444]	-0.777553	0.0853206	GSE227679
100131390	SP9	Sp9 transcription factor [Source:HGNC Symbol;Acc:HGNC:30690]	-0.0467031		GSE227679
100131434	EOLA1-DT	EOLA1 divergent transcript [Source:HGNC Symbol;Acc:HGNC:44265]	-0.421788	0.449435	GSE227679
100131439	CD300LD	CD300 molecule like family member d [Source:HGNC Symbol;Acc:HGNC:16848]	-1.1599		GSE227679
100131454	DBIL5P	diazepam binding inhibitor-like 5, pseudogene [Source:HGNC Symbol;Acc:HGNC:38519]	-0.73673	0.414428	GSE227679
100131608	PRR23D1	proline rich 23 domain containing 1 [Source:HGNC Symbol;Acc:HGNC:49420]	-2.84952		GSE227679
100131608	PRR23D2	proline rich 23 domain containing 2 [Source:HGNC Symbol;Acc:HGNC:49396]	-2.84952		GSE227679
100131655	ZNF236-DT	ZNF236 divergent transcript [Source:HGNC Symbol;Acc:HGNC:53779]	0.75281	0.252213	GSE227679
100131691	MZF1-AS1	MZF1 antisense RNA 1 [Source:HGNC Symbol;Acc:HGNC:51271]	-0.145918	0.787967	GSE227679
100131726	FAM83A-AS1	FAM83A antisense RNA 1 [Source:HGNC Symbol;Acc:HGNC:48658]	0.502583		GSE227679
100131755	ARMCX4	armadillo repeat containing X-linked 4 [Source:HGNC Symbol;Acc:HGNC:28615]	-0.415402	0.330108	GSE227679
100131801	PET100	PET100 cytochrome c oxidase chaperone [Source:HGNC Symbol;Acc:HGNC:40038]	0.25434	0.647893	GSE227679
100131814	AHI1-DT	AHI1 divergent transcript [Source:HGNC Symbol;Acc:HGNC:32526]	-0.0963363	0.942943	GSE227679
100131816	UBE2DNL	ubiquitin conjugating enzyme E2 D N-terminal like (pseudogene) [Source:HGNC Symbol;Acc:HGNC:28656]			GSE227679
100131827	ZNF717	zinc finger protein 717 [Source:HGNC Symbol;Acc:HGNC:29448]	-0.326992	0.436289	GSE227679
100131897	INSYN2B	inhibitory synaptic factor family member 2B [Source:HGNC Symbol;Acc:HGNC:37271]	-1.0038	0.214534	GSE227679
100131902	KRTAP25-1	keratin associated protein 25-1 [Source:HGNC Symbol;Acc:HGNC:34003]			GSE227679
100131980	ZNF705B	zinc finger protein 705B [Source:HGNC Symbol;Acc:HGNC:32284]	0		GSE227679
100131980	ZNF705G	zinc finger protein 705G [Source:HGNC Symbol;Acc:HGNC:37134]	0		GSE227679
100131998	RRN3P3	RRN3 pseudogene 3 [Source:HGNC Symbol;Acc:HGNC:37620]	-0.176651	0.754144	GSE227679
100132015	TEX13D	TEX13 family member D [Source:HGNC Symbol;Acc:HGNC:52278]	0.4912		GSE227679
100132074	FOXO6	forkhead box O6 [Source:HGNC Symbol;Acc:HGNC:24814]	0.0448508	0.966067	GSE227679
100132103	FAM66B	family with sequence similarity 66 member B [Source:HGNC Symbol;Acc:HGNC:28890]	-0.690127	0.425858	GSE227679
100132103	FAM66E	family with sequence similarity 66 member E [Source:HGNC Symbol;Acc:HGNC:18735]	-0.690127	0.425858	GSE227679
100132146	FAM240A	family with sequence similarity 240 member A [Source:HGNC Symbol;Acc:HGNC:52390]	-3.72985		GSE227679
100132147	LINC01783	long intergenic non-protein coding RNA 1783 [Source:HGNC Symbol;Acc:HGNC:52573]	-1.65532	0.203984	GSE227679
100132174	LINC01987	long intergenic non-protein coding RNA 1987 [Source:HGNC Symbol;Acc:HGNC:52819]	0.540815		GSE227679
100132202	GOLGA6L25	golgin A6 family like 25 [Source:HGNC Symbol;Acc:HGNC:55711]			GSE227679
100132215	EHBP1-AS1	EHBP1 antisense RNA 1 [Source:HGNC Symbol;Acc:HGNC:55766]	-0.173641	0.757894	GSE227679
100132234	LINC00543	long intergenic non-protein coding RNA 543 [Source:HGNC Symbol;Acc:HGNC:43678]	0.130529		GSE227679
100132247	NPIPB5	nuclear pore complex interacting protein family member B5 [Source:HGNC Symbol;Acc:HGNC:37233]	-0.166278	0.812632	GSE227679
100132288	TEKT4P2	tektin 4 pseudogene 2 [Source:HGNC Symbol;Acc:HGNC:40046]	-0.295722	0.689787	GSE227679
100132304	FAM236B	family with sequence similarity 236 member B [Source:HGNC Symbol;Acc:HGNC:52640]	-1.88052		GSE227679
100132354	LINC01512	long intergenic non-protein coding RNA 1512 [Source:HGNC Symbol;Acc:HGNC:51201]	0.688881		GSE227679
100132386	KRTAP4-9	keratin associated protein 4-9 [Source:HGNC Symbol;Acc:HGNC:18910]	-0.771144		GSE227679
100132396	ZNF705B	zinc finger protein 705B [Source:HGNC Symbol;Acc:HGNC:32284]	-0.23014		GSE227679
100132396	ZNF705G	zinc finger protein 705G [Source:HGNC Symbol;Acc:HGNC:37134]	-0.23014		GSE227679
100132399	GAGE12D	G antigen 12D [Source:HGNC Symbol;Acc:HGNC:31904]	0.130529		GSE227679
100132406	NBPF10	NBPF member 10 [Source:HGNC Symbol;Acc:HGNC:31992]	0.0868878	0.719203	GSE227679
100132463	CLDN24	claudin 24 [Source:HGNC Symbol;Acc:HGNC:37200]	-2.0003	0.122527	GSE227679
100132464	FAM99B	family with sequence similarity 99 member B [Source:HGNC Symbol;Acc:HGNC:32369]			GSE227679
100132476	KRTAP4-7	keratin associated protein 4-7 [Source:HGNC Symbol;Acc:HGNC:18898]			GSE227679
100132565	GOLGA8F	golgin A8 family member F [Source:HGNC Symbol;Acc:HGNC:32378]	-2.86451		GSE227679
100132565	GOLGA8G	golgin A8 family member G [Source:HGNC Symbol;Acc:HGNC:25328]	-2.86451		GSE227679
100132596	XGY2	XG Y-linked 2 (pseudogene) [Source:HGNC Symbol;Acc:HGNC:34022]	1.0476	0.427733	GSE227679
100132612	LINC02312	long intergenic non-protein coding RNA 2312 [Source:HGNC Symbol;Acc:HGNC:53231]	0.810396		GSE227679
100132677	BSN-DT	BSN divergent transcript [Source:HGNC Symbol;Acc:HGNC:42445]	2.61108		GSE227679
100132708	CYP4F30P	cytochrome P450 family 4 subfamily F member 30, pseudogene [Source:HGNC Symbol;Acc:HGNC:25270]	1.76393	0.271906	GSE227679
100132735	FILNC1	FOXO induced long non-coding RNA 1 [Source:HGNC Symbol;Acc:HGNC:53755]	2.95232		GSE227679
100132891	MSC-AS1	MSC antisense RNA 1 [Source:HGNC Symbol;Acc:HGNC:48724]	0.656122	0.382202	GSE227679
100132916	SHISAL2B	shisa like 2B [Source:HGNC Symbol;Acc:HGNC:34236]	-0.185705	0.853926	GSE227679
100132923	FAM66D	family with sequence similarity 66 member D [Source:HGNC Symbol;Acc:HGNC:24159]	-0.61935	0.313992	GSE227679
100132929	FAM25BP	family with sequence similarity 25 member B, pseudogene [Source:HGNC Symbol;Acc:HGNC:23584]	-3.70314		GSE227679
100132932	FAM197Y9	family with sequence similarity 197 Y-linked member 9 [Source:HGNC Symbol;Acc:HGNC:37477]			GSE227679
100132948	FAM27C	family with sequence similarity 27 member C [Source:HGNC Symbol;Acc:HGNC:23668]	-0.956724	0.210697	GSE227679
100132963	SMIM9	small integral membrane protein 9 [Source:HGNC Symbol;Acc:HGNC:41915]	-0.0152468		GSE227679
100132967	FAM223A	family with sequence similarity 223 member A [Source:HGNC Symbol;Acc:HGNC:30612]	-0.404279		GSE227679
100132979	GOLGA8DP	golgin A8 family member D, pseudogene [Source:HGNC Symbol;Acc:HGNC:32376]	-4.4309		GSE227679
100132987	LINC00595	long intergenic non-protein coding RNA 856 [Source:HGNC Symbol;Acc:HGNC:45111]	-0.159873	0.963646	GSE227679
100132987	LINC00856	long intergenic non-protein coding RNA 856 [Source:HGNC Symbol;Acc:HGNC:45111]	-0.159873	0.963646	GSE227679
100132994	CXorf49B	chromosome X open reading frame 49B [Source:HGNC Symbol;Acc:HGNC:34229]	-2.88046		GSE227679
100133036	FAM95B1	family with sequence similarity 95 member B1 [Source:HGNC Symbol;Acc:HGNC:32318]	-0.753228	0.669715	GSE227679
100133053	CXorf51B	chromosome X open reading frame 51B [Source:HGNC Symbol;Acc:HGNC:42787]			GSE227679
100133091	LINC03009	long intergenic non-protein coding RNA 3009 [Source:HGNC Symbol;Acc:HGNC:56134]	-0.122309	0.839738	GSE227679
100133093	FAM25G	family with sequence similarity 25 member G [Source:HGNC Symbol;Acc:HGNC:23590]	-3.07362		GSE227679
100133123	LINC01203	long intergenic non-protein coding RNA 1203 [Source:HGNC Symbol;Acc:HGNC:49634]			GSE227679
100133205	LINC00240	long intergenic non-protein coding RNA 240 [Source:HGNC Symbol;Acc:HGNC:18772]	-0.99644	0.198208	GSE227679
100133220	GOLGA6L5P	golgin A6 family like 5, pseudogene [Source:HGNC Symbol;Acc:HGNC:30472]	-0.448988	0.550341	GSE227679
100133220	GOLGA6L3P	golgin A6 family like 3, pseudogene [Source:HGNC Symbol;Acc:HGNC:37441]	-0.448988	0.550341	GSE227679
100133234	SBF1P1	SET binding factor 1 pseudogene 1 [Source:HGNC Symbol;Acc:HGNC:31098]	-0.170137		GSE227679
100133251	PRR23D1	proline rich 23 domain containing 1 [Source:HGNC Symbol;Acc:HGNC:49420]	-3.6956		GSE227679
100133251	PRR23D2	proline rich 23 domain containing 2 [Source:HGNC Symbol;Acc:HGNC:49396]	-3.6956		GSE227679
100133267	DEFB130B	defensin beta 130B [Source:HGNC Symbol;Acc:HGNC:39814]			GSE227679
100133311	HOXA-AS3	HOXA cluster antisense RNA 3 [Source:HGNC Symbol;Acc:HGNC:43748]	-0.605162	0.387465	GSE227679
100133315	XNDC1N	XRCC1 N-terminal domain containing 1, N-terminal like [Source:HGNC Symbol;Acc:HGNC:54661]	0.0183912	0.977343	GSE227679
100133461	LINC02171	long intergenic non-protein coding RNA 2171 [Source:HGNC Symbol;Acc:HGNC:53033]			GSE227679
100133545	MRPL23-AS1	MRPL23 antisense RNA 1 [Source:HGNC Symbol;Acc:HGNC:42812]	-1.49877	0.161302	GSE227679
100133612	LINC01134	long intergenic non-protein coding RNA 1134 [Source:HGNC Symbol;Acc:HGNC:49449]	1.48063	0.348651	GSE227679
100133941	CD24	CD24 molecule [Source:HGNC Symbol;Acc:HGNC:1645]	-0.101853	0.946993	GSE227679
100133957	UXT-AS1	UXT antisense RNA 1 [Source:HGNC Symbol;Acc:HGNC:49239]	-0.204579	0.692239	GSE227679
100133985	LINC01816	long intergenic non-protein coding RNA 1816 [Source:HGNC Symbol;Acc:HGNC:52621]	0.753825	0.542423	GSE227679
100134015	UBOX5-AS1	UBOX5 antisense RNA 1 [Source:HGNC Symbol;Acc:HGNC:44111]	0.0792081	0.910434	GSE227679
100134229	KDM7A-DT	KDM7A divergent transcript [Source:HGNC Symbol;Acc:HGNC:48959]	0.411357	0.527321	GSE227679
100134259	LINC01118	long intergenic non-protein coding RNA 1118 [Source:HGNC Symbol;Acc:HGNC:49261]	-1.19051	0.414428	GSE227679
100134391	LINC02092	long intergenic non-protein coding RNA 2092 [Source:HGNC Symbol;Acc:HGNC:52943]	0.4912		GSE227679
100134444	KCNJ18	potassium inwardly rectifying channel subfamily J member 18 [Source:HGNC Symbol;Acc:HGNC:39080]	-0.459823		GSE227679
100134713	NDUFB2-AS1	NDUFB2 antisense RNA 1 [Source:HGNC Symbol;Acc:HGNC:40396]	0.218293	0.712123	GSE227679
100134934	TEN1	TEN1 subunit of CST complex [Source:HGNC Symbol;Acc:HGNC:37242]	-0.138874	0.735555	GSE227679
100134938	UPK3BL1	uroplakin 3B like 1 [Source:HGNC Symbol;Acc:HGNC:37278]	-0.158116	0.766942	GSE227679
100137047	JMJD7	jumonji domain containing 7 [Source:HGNC Symbol;Acc:HGNC:34397]	-0.399906	0.346362	GSE227679
100137049	PLA2G4B	phospholipase A2 group IVB [Source:HGNC Symbol;Acc:HGNC:9036]	-0.567171	0.271199	GSE227679
10014	HDAC5	histone deacetylase 5 [Source:HGNC Symbol;Acc:HGNC:14068]	-0.366778	0.256866	GSE227679
100141515	C17orf99	chromosome 17 open reading frame 99 [Source:HGNC Symbol;Acc:HGNC:34490]	2.75099		GSE227679
100142659	CTAGE8	CTAGE family member 8 [Source:HGNC Symbol;Acc:HGNC:37294]	-0.498076	0.249526	GSE227679
100144595	GALNT13-AS1	GALNT13 antisense RNA 1 [Source:HGNC Symbol;Acc:HGNC:56700]	2.4792		GSE227679
100144597	LINC01056	long intergenic non-protein coding RNA 1056 [Source:HGNC Symbol;Acc:HGNC:49050]			GSE227679
100144602	EPHA5-AS1	EPHA5 antisense RNA 1 [Source:HGNC Symbol;Acc:HGNC:50602]	-1.77298		GSE227679
100144603	CHKB-DT	CHKB divergent transcript [Source:HGNC Symbol;Acc:HGNC:40146]	0.327535	0.759187	GSE227679
100144748	KLLN	killin, p53 regulated DNA replication inhibitor [Source:HGNC Symbol;Acc:HGNC:37212]	-0.107237	0.90573	GSE227679
100147744	RNU7-1	RNA, U7 small nuclear 1 [Source:HGNC Symbol;Acc:HGNC:34033]	-0.235953	0.790393	GSE227679
10015	PDCD6IP	programmed cell death 6 interacting protein [Source:HGNC Symbol;Acc:HGNC:8766]	0.145193	0.361958	GSE227679
100151643	KRTAP20-4	keratin associated protein 20-4 [Source:HGNC Symbol;Acc:HGNC:34002]			GSE227679
100151683	RNU4ATAC	RNA, U4atac small nuclear [Source:HGNC Symbol;Acc:HGNC:34016]	-0.373991	0.736218	GSE227679
100151684	RNU6ATAC	RNA, U6atac small nuclear [Source:HGNC Symbol;Acc:HGNC:34017]	1.12801	0.216938	GSE227679
100158262	SCARNA9	small Cajal body-specific RNA 9 [Source:HGNC Symbol;Acc:HGNC:32566]	-0.000662004	0.999488	GSE227679
10016	PDCD6	programmed cell death 6 [Source:HGNC Symbol;Acc:HGNC:8765]	0.293972	0.265404	GSE227679
100169751	RNA5S1	RNA, 5S ribosomal 1 [Source:HGNC Symbol;Acc:HGNC:34362]	-0.42235	0.710132	GSE227679
100169752	TEX36-AS1	TEX36 antisense RNA 1 [Source:HGNC Symbol;Acc:HGNC:49500]			GSE227679
100169753	RNA5S2	RNA, 5S ribosomal 2 [Source:HGNC Symbol;Acc:HGNC:34363]	-0.462782	0.672211	GSE227679
100169754	RNA5S3	RNA, 5S ribosomal 3 [Source:HGNC Symbol;Acc:HGNC:34364]	-0.519179	0.601592	GSE227679
100169755	RNA5S4	RNA, 5S ribosomal 4 [Source:HGNC Symbol;Acc:HGNC:34365]	-0.382685	0.724837	GSE227679
100169756	RNA5S5	RNA, 5S ribosomal 5 [Source:HGNC Symbol;Acc:HGNC:34366]	-0.245006	0.847127	GSE227679
100169757	RNA5S6	RNA, 5S ribosomal 6 [Source:HGNC Symbol;Acc:HGNC:34367]	-0.465693	0.657086	GSE227679
100169758	RNA5S7	RNA, 5S ribosomal 7 [Source:HGNC Symbol;Acc:HGNC:34368]	-0.271733	0.807618	GSE227679
100169759	RNA5S8	RNA, 5S ribosomal 8 [Source:HGNC Symbol;Acc:HGNC:34369]	-0.488001	0.648908	GSE227679
100169760	RNA5S9	RNA, 5S ribosomal 9 [Source:HGNC Symbol;Acc:HGNC:34370]	-1.83093		GSE227679
100169761	RNA5S10	RNA, 5S ribosomal 10 [Source:HGNC Symbol;Acc:HGNC:34371]	-0.392696	0.722175	GSE227679
100169762	RNA5S11	RNA, 5S ribosomal 11 [Source:HGNC Symbol;Acc:HGNC:34372]	-0.52561	0.594344	GSE227679
100169763	RNA5S12	RNA, 5S ribosomal 12 [Source:HGNC Symbol;Acc:HGNC:34373]	-0.599626	0.543258	GSE227679
100169763	RNA5S3	RNA, 5S ribosomal 3 [Source:HGNC Symbol;Acc:HGNC:34364]	-0.599626	0.543258	GSE227679
100169764	RNA5S13	RNA, 5S ribosomal 13 [Source:HGNC Symbol;Acc:HGNC:34374]	-0.458697	0.663808	GSE227679
100169765	RNA5S14	RNA, 5S ribosomal 14 [Source:HGNC Symbol;Acc:HGNC:34375]	-0.555513	0.566087	GSE227679
100169766	RNA5S15	RNA, 5S ribosomal 15 [Source:HGNC Symbol;Acc:HGNC:34376]	-0.459479	0.672211	GSE227679
100169767	RNA5S16	RNA, 5S ribosomal 16 [Source:HGNC Symbol;Acc:HGNC:34377]	-0.528432	0.613101	GSE227679
100169768	RNA5S17	RNA, 5S ribosomal 17 [Source:HGNC Symbol;Acc:HGNC:34378]	-0.470822	0.64297	GSE227679
100169851	PATE3	prostate and testis expressed 3 [Source:HGNC Symbol;Acc:HGNC:35426]	0.735019		GSE227679
10017	BCL2L10	BCL2 like 10 [Source:HGNC Symbol;Acc:HGNC:993]	0.215056	0.944881	GSE227679
100170229	SRRM5	serine/arginine repetitive matrix 5 [Source:HGNC Symbol;Acc:HGNC:37248]	0.312215	0.460369	GSE227679
100170765	ERICH4	glutamate rich 4 [Source:HGNC Symbol;Acc:HGNC:34497]	-1.61212	0.54147	GSE227679
100170841	EPOP	elongin BC and polycomb repressive complex 2 associated protein [Source:HGNC Symbol;Acc:HGNC:34493]	-0.183874	0.892456	GSE227679
10018	BCL2L11	BCL2 like 11 [Source:HGNC Symbol;Acc:HGNC:994]	0.283999	0.407576	GSE227679
100187716	MIR1224	microRNA 1224 [Source:HGNC Symbol;Acc:HGNC:33923]	-1.35197		GSE227679
100188847	MIR1225	microRNA 1225 [Source:HGNC Symbol;Acc:HGNC:33931]	-0.954379	0.763487	GSE227679
100188893	TOMM6	translocase of outer mitochondrial membrane 6 [Source:HGNC Symbol;Acc:HGNC:34528]	0.302583	0.388482	GSE227679
100188949	LINC00426	long intergenic non-protein coding RNA 426 [Source:HGNC Symbol;Acc:HGNC:42761]	0.748244	0.48576	GSE227679
100188953	LINC00092	long intergenic non-protein coding RNA 92 [Source:HGNC Symbol;Acc:HGNC:31408]	-1.05971	0.5873	GSE227679
100189589	DCTN1-AS1	DCTN1 antisense RNA 1 [Source:HGNC Symbol;Acc:HGNC:44151]	0.0486389	0.973262	GSE227679
10019	SH2B3	SH2B adaptor protein 3 [Source:HGNC Symbol;Acc:HGNC:29605]	0.238411	0.596623	GSE227679
100190938	RAMP2-AS1	RAMP2 antisense RNA 1 [Source:HGNC Symbol;Acc:HGNC:44358]	-0.281609	0.719152	GSE227679
100190949	C5orf52	chromosome 5 open reading frame 52 [Source:HGNC Symbol;Acc:HGNC:35121]	1.27517		GSE227679
100191040	C2CD4D	C2 calcium dependent domain containing 4D [Source:HGNC Symbol;Acc:HGNC:37210]	0.161423	0.869586	GSE227679
100192420	LINC01634	long intergenic non-protein coding RNA 1634 [Source:HGNC Symbol;Acc:HGNC:52421]	-0.501581	0.89168	GSE227679
1002	CDH4	cadherin 4 [Source:HGNC Symbol;Acc:HGNC:1763]	-1.74897	0.0147267	GSE227679
10020	GNE	glucosamine (UDP-N-acetyl)-2-epimerase/N-acetylmannosamine kinase [Source:HGNC Symbol;Acc:HGNC:23657]	-0.463083	0.114232	GSE227679
10021	HCN4	hyperpolarization activated cyclic nucleotide gated potassium channel 4 [Source:HGNC Symbol;Acc:HGNC:16882]	-0.270574		GSE227679
100216001	MANCR	mitotically associated long non coding RNA [Source:HGNC Symbol;Acc:HGNC:44678]	3.43843	0.11316	GSE227679
10022	INSL5	insulin like 5 [Source:HGNC Symbol;Acc:HGNC:6088]	1.46227		GSE227679
10023	FRAT1	FRAT regulator of WNT signaling pathway 1 [Source:HGNC Symbol;Acc:HGNC:3944]	0.115576	0.857925	GSE227679
100233209	PCED1B-AS1	PCED1B antisense RNA 1 [Source:HGNC Symbol;Acc:HGNC:44166]	0.317151	0.545929	GSE227679
10024	TROAP	trophinin associated protein [Source:HGNC Symbol;Acc:HGNC:12327]	2.98055	2.74032e-05	GSE227679
10025	MED16	mediator complex subunit 16 [Source:HGNC Symbol;Acc:HGNC:17556]	-0.164962	0.729752	GSE227679
10026	PIGK	phosphatidylinositol glycan anchor biosynthesis class K [Source:HGNC Symbol;Acc:HGNC:8965]	0.0259228	0.958328	GSE227679
100268168	RPL26L1-AS1	RPL26L1 antisense RNA 1 [Source:HGNC Symbol;Acc:HGNC:55914]	-0.186397	0.918884	GSE227679
100270679	LINC01432	long intergenic non-protein coding RNA 1432 [Source:HGNC Symbol;Acc:HGNC:50745]			GSE227679
100270680	CASC11	cancer susceptibility 11 [Source:HGNC Symbol;Acc:HGNC:48939]	-2.98719	0.0624397	GSE227679
100270804	LCDR	lysosome cell death regulator [Source:HGNC Symbol;Acc:HGNC:44308]	-1.25019	0.0895164	GSE227679
100271702	LINC00940	long intergenic non-protein coding RNA 940 [Source:HGNC Symbol;Acc:HGNC:48634]	0.538725	0.790778	GSE227679
100271715	ARHGEF33	Rho guanine nucleotide exchange factor 33 [Source:HGNC Symbol;Acc:HGNC:37252]	-0.284574	0.730099	GSE227679
100271846	ERVV-2	endogenous retrovirus group V member 2, envelope [Source:HGNC Symbol;Acc:HGNC:39051]	3.08935		GSE227679
100271849	MEF2B	myocyte enhancer factor 2B [Source:HGNC Symbol;Acc:HGNC:6995]	0.00745581	0.99367	GSE227679
100271873	AIRN	antisense of IGF2R non-protein coding RNA [Source:HGNC Symbol;Acc:HGNC:34515]	-0.414475	0.697711	GSE227679
100271927	RASA4B	RAS p21 protein activator 4B [Source:HGNC Symbol;Acc:HGNC:35202]	-0.495849	0.426487	GSE227679
100272147	CMC4	C-X9-C motif containing 4 [Source:HGNC Symbol;Acc:HGNC:35428]	0.00524421	0.993292	GSE227679
100286844	BCDIN3D-AS1	BCDIN3D antisense RNA 1 [Source:HGNC Symbol;Acc:HGNC:44113]	0.211054	0.771926	GSE227679
100287015	MCPH1-DT	MCPH1 divergent transcript [Source:HGNC Symbol;Acc:HGNC:55599]	-0.177966	0.830758	GSE227679
100287042	MIF4GD-DT	MIF4GD divergent transcript [Source:HGNC Symbol;Acc:HGNC:55335]	0.260017	0.736857	GSE227679
100287045	FAM90A26	family with sequence similarity 90 member A26 [Source:HGNC Symbol;Acc:HGNC:43746]	1.27617		GSE227679
100287049	DCAF8-DT	DCAF8 divergent transcript [Source:HGNC Symbol;Acc:HGNC:55792]	-0.00775889	0.990141	GSE227679
100287144	USP17L10	ubiquitin specific peptidase 17 like family member 10 [Source:HGNC Symbol;Acc:HGNC:44438]	0.354869		GSE227679
100287171	WASHC1	WASH complex subunit 1 [Source:HGNC Symbol;Acc:HGNC:24361]	-0.158931	0.759187	GSE227679
100287177	EML2-AS1	EML2 antisense RNA 1 [Source:HGNC Symbol;Acc:HGNC:48331]	-0.0867545	0.943439	GSE227679
100287178	USP17L11	ubiquitin specific peptidase 17 like family member 11 [Source:HGNC Symbol;Acc:HGNC:44439]	0.125118	0.940248	GSE227679
100287205	USP17L12	ubiquitin specific peptidase 17 like family member 12 [Source:HGNC Symbol;Acc:HGNC:44440]	0.147644		GSE227679
100287225	LINC01630	long intergenic non-protein coding RNA 1630 [Source:HGNC Symbol;Acc:HGNC:52295]	0.671535		GSE227679
100287226	ZNF729	zinc finger protein 729 [Source:HGNC Symbol;Acc:HGNC:32464]	0.673366	0.834146	GSE227679
100287238	USP17L13	ubiquitin specific peptidase 17 like family member 13 [Source:HGNC Symbol;Acc:HGNC:44441]	-1.74347		GSE227679
100287284	MANSC4	MANSC domain containing 4 [Source:HGNC Symbol;Acc:HGNC:40023]	-0.376345	0.88543	GSE227679
100287327	USP17L17	ubiquitin specific peptidase 17 like family member 17 [Source:HGNC Symbol;Acc:HGNC:44445]	-0.160362		GSE227679
100287362	PRSS46P	serine protease 46, pseudogene [Source:HGNC Symbol;Acc:HGNC:37325]	-0.998634	0.503644	GSE227679
100287364	USP17L18	ubiquitin specific peptidase 17 like family member 18 [Source:HGNC Symbol;Acc:HGNC:44446]	0.14181	0.928532	GSE227679
100287366	OSTM1-AS1	OSTM1 antisense RNA 1 [Source:HGNC Symbol;Acc:HGNC:43666]	-1.39409		GSE227679
100287399	POTEB	POTE ankyrin domain family member B [Source:HGNC Symbol;Acc:HGNC:33734]	0.700304		GSE227679
100287399	POTEB2	POTE ankyrin domain family member B2 [Source:HGNC Symbol;Acc:HGNC:48327]	0.700304		GSE227679
100287404	USP17L19	ubiquitin specific peptidase 17 like family member 19 [Source:HGNC Symbol;Acc:HGNC:44447]	-0.72497		GSE227679
100287441	USP17L20	ubiquitin specific peptidase 17 like family member 20 [Source:HGNC Symbol;Acc:HGNC:44448]	-0.503744	0.756204	GSE227679
100287478	USP17L21	ubiquitin specific peptidase 17 like family member 21 [Source:HGNC Symbol;Acc:HGNC:44449]	0.37353		GSE227679
100287482	SMKR1	small lysine rich protein 1 [Source:HGNC Symbol;Acc:HGNC:43561]	0.617567	0.667432	GSE227679
100287513	USP17L22	ubiquitin specific peptidase 17 like family member 22 [Source:HGNC Symbol;Acc:HGNC:44450]	-1.65833		GSE227679
100287520	GLYATL1B	glycine-N-acyltransferase like 1B [Source:HGNC Symbol;Acc:HGNC:37865]	-0.986125	0.524677	GSE227679
100287559	ADPGK-AS1	ADPGK antisense RNA 1 [Source:HGNC Symbol;Acc:HGNC:44144]	-0.0658603	0.918418	GSE227679
100287569	LINC00173	long intergenic non-protein coding RNA 173 [Source:HGNC Symbol;Acc:HGNC:33791]	-0.0719687	0.964934	GSE227679
100287616	LOXL1-AS1	LOXL1 antisense RNA 1 [Source:HGNC Symbol;Acc:HGNC:44169]	0.343352	0.57662	GSE227679
100287718	ANKRD66	ankyrin repeat domain 66 [Source:HGNC Symbol;Acc:HGNC:44669]	0		GSE227679
100287722	AP4B1-AS1	AP4B1 antisense RNA 1 [Source:HGNC Symbol;Acc:HGNC:44114]	0.0518258	0.896748	GSE227679
100287879	LINC00994	long intergenic non-protein coding RNA 994 [Source:HGNC Symbol;Acc:HGNC:48949]	1.09897		GSE227679
100287896	LIPT2-AS1	LIPT2 antisense RNA 1 [Source:HGNC Symbol;Acc:HGNC:56172]	0.24745	0.688003	GSE227679
100287898	TTC34	tetratricopeptide repeat domain 34 [Source:HGNC Symbol;Acc:HGNC:34297]	-1.05179	0.193405	GSE227679
100287902	LGALS8-AS1	LGALS8 antisense RNA 1 [Source:HGNC Symbol;Acc:HGNC:40340]	0.38006	0.50766	GSE227679
100287932	TIMM23	translocase of inner mitochondrial membrane 23 [Source:HGNC Symbol;Acc:HGNC:17312]	0.493221	0.0205192	GSE227679
100287948	LINC01699	long intergenic non-protein coding RNA 1699 [Source:HGNC Symbol;Acc:HGNC:52487]	2.36242		GSE227679
100288072	SDR42E2	short chain dehydrogenase/reductase family 42E, member 2 [Source:HGNC Symbol;Acc:HGNC:35414]	-0.738233	0.544701	GSE227679
100288077	WTAPP1	WTAP pseudogene 1 [Source:HGNC Symbol;Acc:HGNC:44115]	0.311164	0.806315	GSE227679
100288122	LDLRAD4-AS1	LDLRAD4 antisense RNA 1 [Source:HGNC Symbol;Acc:HGNC:48592]	-0.354749	0.514013	GSE227679
100288142	NBPF20	NBPF member 20 [Source:HGNC Symbol;Acc:HGNC:32000]	0.145907	0.466952	GSE227679
100288181	LNCOC1	lncRNA associated with ovarian cancer 1 [Source:HGNC Symbol;Acc:HGNC:53947]	0.39753	0.690296	GSE227679
100288198	HMGN3-AS1	HMGN3 antisense RNA 1 [Source:HGNC Symbol;Acc:HGNC:48984]	-0.305241	0.508803	GSE227679
100288287	KRTAP22-2	keratin associated protein 22-2 [Source:HGNC Symbol;Acc:HGNC:37091]			GSE227679
100288323	KRTAP21-3	keratin associated protein 21-3 [Source:HGNC Symbol;Acc:HGNC:34216]			GSE227679
100288332	NPIPA5	nuclear pore complex interacting protein family member A5 [Source:HGNC Symbol;Acc:HGNC:41980]	0.00249	0.997337	GSE227679
100288413	ERVMER34-1	endogenous retrovirus group MER34 member 1, envelope [Source:HGNC Symbol;Acc:HGNC:42970]	-0.803457	0.48405	GSE227679
100288520	USP17L15	ubiquitin specific peptidase 17 like family member 15 [Source:HGNC Symbol;Acc:HGNC:44443]	-0.0397673	0.981365	GSE227679
100288687	DUX4	double homeobox 4 [Source:HGNC Symbol;Acc:HGNC:50800]	2.58866		GSE227679
100288695	LIMS4	LIM zinc finger domain containing 4 [Source:HGNC Symbol;Acc:HGNC:39941]	0.0828128	0.884149	GSE227679
100288778	WASH8P	WAS protein family homolog 8, pseudogene [Source:HGNC Symbol;Acc:HGNC:53913]	-0.100694	0.893909	GSE227679
100288797	TMEM239	transmembrane protein 239 [Source:HGNC Symbol;Acc:HGNC:40044]	-0.420865		GSE227679
100288798	SLC38A4-AS1	SLC38A4 antisense RNA 1 [Source:HGNC Symbol;Acc:HGNC:56178]	0.237581	0.665702	GSE227679
100288801	FRG2C	FSHD region gene 2 family member C [Source:HGNC Symbol;Acc:HGNC:33626]	-0.4518	0.829267	GSE227679
100288814	CLDN34	claudin 34 [Source:HGNC Symbol;Acc:HGNC:51259]	-0.10898		GSE227679
100288831	SRGAP3-AS3	SRGAP3 antisense RNA 3 [Source:HGNC Symbol;Acc:HGNC:40900]	0.593685	0.738913	GSE227679
100288842	B3GALT9	beta-1,3-galactosyltransferase 9 [Source:HGNC Symbol;Acc:HGNC:53652]	0.208901	0.686194	GSE227679
100288846	MIA2-AS1	MIA2 antisense RNA 1 [Source:HGNC Symbol;Acc:HGNC:55436]	-0.124484	0.892344	GSE227679
100288866	NGFR-AS1	NGFR antisense RNA 1 [Source:HGNC Symbol;Acc:HGNC:55555]	-1.63894	0.0387731	GSE227679
100289061	ADAMTSL4-AS2	ADAMTSL4 antisense RNA 2 [Source:HGNC Symbol;Acc:HGNC:40895]	-0.631439	0.334832	GSE227679
100289087	TSPY10	testis specific protein Y-linked 10 [Source:HGNC Symbol;Acc:HGNC:37473]			GSE227679
100289087	TSPY3	testis specific protein Y-linked 3 [Source:HGNC Symbol;Acc:HGNC:33876]			GSE227679
100289092	ATP2A1-AS1	ATP2A1 antisense RNA 1 [Source:HGNC Symbol;Acc:HGNC:51370]	1.14177	0.478999	GSE227679
100289098	LINC03011	long intergenic non-protein coding RNA 3011 [Source:HGNC Symbol;Acc:HGNC:56136]	-0.559715	0.538561	GSE227679
100289137	ANKRD18A	ankyrin repeat domain 18A [Source:HGNC Symbol;Acc:HGNC:23643]	-1.64461	0.22439	GSE227679
100289150	FAM197Y5	family with sequence similarity 197 Y-linked member 5 [Source:HGNC Symbol;Acc:HGNC:37467]			GSE227679
100289178	GNG12-AS1	GNG12, DIRAS3 and WLS antisense RNA 1 [Source:HGNC Symbol;Acc:HGNC:43938]	-1.016	0.0199807	GSE227679
100289187	TMEM225B	transmembrane protein 225B [Source:HGNC Symbol;Acc:HGNC:53075]	-0.0213539	0.952405	GSE227679
100289188	FAM197Y4	family with sequence similarity 197 Y-linked member 4 [Source:HGNC Symbol;Acc:HGNC:37466]			GSE227679
100289211	LINC00624	long intergenic non-protein coding RNA 624 [Source:HGNC Symbol;Acc:HGNC:44254]	3.8273	0.407786	GSE227679
100289230	CHD1-DT	CHD1 divergent transcript [Source:HGNC Symbol;Acc:HGNC:52907]	-0.379353	0.460528	GSE227679
100289255	TMEM238L	transmembrane protein 238 like [Source:HGNC Symbol;Acc:HGNC:44356]	0.042766	0.988617	GSE227679
100289274	DNAJC3-DT	DNAJC3 divergent transcript [Source:HGNC Symbol;Acc:HGNC:39808]	0.103213	0.906328	GSE227679
100289279	CNTNAP3C	contactin associated protein family member 3C [Source:HGNC Symbol;Acc:HGNC:53878]	-1.73067	0.0124929	GSE227679
100289341	MAN1B1-DT	MAN1B1 divergent transcript [Source:HGNC Symbol;Acc:HGNC:48715]	0.146347	0.869693	GSE227679
100289373	UBAC2-AS1	UBAC2 antisense RNA 1 [Source:HGNC Symbol;Acc:HGNC:42502]	0.121537	0.923787	GSE227679
100289388	KCTD21-AS1	KCTD21 antisense RNA 1 [Source:HGNC Symbol;Acc:HGNC:48674]	0.557378	0.200623	GSE227679
100289462	DEFB4A	defensin beta 4A [Source:HGNC Symbol;Acc:HGNC:2767]			GSE227679
100289462	DEFB4B	defensin beta 4B [Source:HGNC Symbol;Acc:HGNC:30193]			GSE227679
100289635	ZNF605	zinc finger protein 605 [Source:HGNC Symbol;Acc:HGNC:28068]	0.172147	0.503383	GSE227679
100289650	PSG8-AS1	PSG8 antisense RNA 1 [Source:HGNC Symbol;Acc:HGNC:52550]	-1.84663	0.360378	GSE227679
100289678	ZNF783	zinc finger protein 783 [Source:HGNC Symbol;Acc:HGNC:27222]	-0.201821	0.640367	GSE227679
100292680	LINC00942	long intergenic non-protein coding RNA 942 [Source:HGNC Symbol;Acc:HGNC:48636]	0.36859	0.875307	GSE227679
100293516	ZNF587B	zinc finger protein 587B [Source:HGNC Symbol;Acc:HGNC:37142]	0.380658	0.271432	GSE227679
100294362	RNF213-AS1	RNF213 antisense RNA 1 [Source:HGNC Symbol;Acc:HGNC:54402]	0.491316	0.126966	GSE227679
100294720	NHEG1	neuroblastoma highly expressed DDX5 stabilizing lncRNA 1 [Source:HGNC Symbol;Acc:HGNC:56731]	-2.92345		GSE227679
1003	CDH5	cadherin 5 [Source:HGNC Symbol;Acc:HGNC:1764]	-0.252038	0.797244	GSE227679
100302111	MIR1184-1	microRNA 1184-1 [Source:HGNC Symbol;Acc:HGNC:35265]	0.907346	0.139806	GSE227679
100302112	MIR1284	microRNA 1284 [Source:HGNC Symbol;Acc:HGNC:35362]	0.0106797	0.997337	GSE227679
100302113	MIR1200	microRNA 1200 [Source:HGNC Symbol;Acc:HGNC:35266]	-1.023	0.536617	GSE227679
100302114	MIR513C	microRNA 513c [Source:HGNC Symbol;Acc:HGNC:33934]			GSE227679
100302115	MIR1468	microRNA 1468 [Source:HGNC Symbol;Acc:HGNC:35250]			GSE227679
100302116	MIR1265	microRNA 1265 [Source:HGNC Symbol;Acc:HGNC:35332]			GSE227679
100302118	MIR1286	microRNA 1286 [Source:HGNC Symbol;Acc:HGNC:35279]	-1.98568		GSE227679
100302119	MIR1538	microRNA 1538 [Source:HGNC Symbol;Acc:HGNC:35382]	-0.951479		GSE227679
100302121	MIR1276	microRNA 1276 [Source:HGNC Symbol;Acc:HGNC:35347]	-0.693028	0.811766	GSE227679
100302122	MIR1183	microRNA 1183 [Source:HGNC Symbol;Acc:HGNC:35264]	2.18175		GSE227679
100302123	MIR1275	microRNA 1275 [Source:HGNC Symbol;Acc:HGNC:35346]	0.85187		GSE227679
100302124	MIR1288	microRNA 1288 [Source:HGNC Symbol;Acc:HGNC:35363]	0.581428		GSE227679
100302125	MIR1289-1	microRNA 1289-1 [Source:HGNC Symbol;Acc:HGNC:35281]	0.0549739		GSE227679
100302126	MIR1471	microRNA 1471 [Source:HGNC Symbol;Acc:HGNC:35380]			GSE227679
100302127	MIR1470	microRNA 1470 [Source:HGNC Symbol;Acc:HGNC:35379]	0.310864		GSE227679
100302128	MIR1302-3	microRNA 1302-3 [Source:HGNC Symbol;Acc:HGNC:35295]	-1.08823		GSE227679
100302129	MIR1915	microRNA 1915 [Source:HGNC Symbol;Acc:HGNC:35399]			GSE227679
100302130	MIR1302-4	microRNA 1302-4 [Source:HGNC Symbol;Acc:HGNC:35296]	1.56938		GSE227679
100302131	MIR302F	microRNA 302f [Source:HGNC Symbol;Acc:HGNC:35349]			GSE227679
100302132	MIR1182	microRNA 1182 [Source:HGNC Symbol;Acc:HGNC:35263]	-0.605589	0.603485	GSE227679
100302133	MIR1287	microRNA 1287 [Source:HGNC Symbol;Acc:HGNC:35280]	-0.317748	0.762915	GSE227679
100302134	MIR1289-2	microRNA 1289-2 [Source:HGNC Symbol;Acc:HGNC:35282]			GSE227679
100302136	MIR1252	microRNA 1252 [Source:HGNC Symbol;Acc:HGNC:35365]	1.02673		GSE227679
100302137	MIR1914	microRNA 1914 [Source:HGNC Symbol;Acc:HGNC:35398]	0.458078	0.762685	GSE227679
100302138	MIR1292	microRNA 1292 [Source:HGNC Symbol;Acc:HGNC:35364]	-0.0441464	0.943465	GSE227679
100302139	MIR1537	microRNA 1537 [Source:HGNC Symbol;Acc:HGNC:35381]	0.385539	0.75878	GSE227679
100302140	MIR1302-6	microRNA 1302-6 [Source:HGNC Symbol;Acc:HGNC:35298]			GSE227679
100302141	MIR1913	microRNA 1913 [Source:HGNC Symbol;Acc:HGNC:35397]	-0.351576	0.879563	GSE227679
100302142	MIR1246	microRNA 1246 [Source:HGNC Symbol;Acc:HGNC:35312]	-1.40136		GSE227679
100302143	MIR1248	microRNA 1248 [Source:HGNC Symbol;Acc:HGNC:35314]	0.222932	0.762467	GSE227679
100302144	MIR1912	microRNA 1912 [Source:HGNC Symbol;Acc:HGNC:35396]			GSE227679
100302145	MIR1247	microRNA 1247 [Source:HGNC Symbol;Acc:HGNC:35313]	-1.90234		GSE227679
100302146	MIR1302-5	microRNA 1302-5 [Source:HGNC Symbol;Acc:HGNC:35297]	1.3202		GSE227679
100302147	MIR1302-7	microRNA 1302-7 [Source:HGNC Symbol;Acc:HGNC:35299]			GSE227679
100302148	MIR1263	microRNA 1263 [Source:HGNC Symbol;Acc:HGNC:35329]			GSE227679
100302149	MIR1249	microRNA 1249 [Source:HGNC Symbol;Acc:HGNC:35315]	0.523529	0.79592	GSE227679
100302150	MIR1296	microRNA 1296 [Source:HGNC Symbol;Acc:HGNC:35249]	0.2233	0.858289	GSE227679
100302152	MIR548N	microRNA 548n [Source:HGNC Symbol;Acc:HGNC:35330]	0.18104		GSE227679
100302153	MIR1298	microRNA 1298 [Source:HGNC Symbol;Acc:HGNC:35258]			GSE227679
100302155	MIR1256	microRNA 1256 [Source:HGNC Symbol;Acc:HGNC:35321]	-0.198993	0.934916	GSE227679
100302156	MIR1229	microRNA 1229 [Source:HGNC Symbol;Acc:HGNC:33924]	-1.09364		GSE227679
100302157	MIR1185-1	microRNA 1185-1 [Source:HGNC Symbol;Acc:HGNC:35257]	0.600976		GSE227679
100302158	MIR1231	microRNA 1231 [Source:HGNC Symbol;Acc:HGNC:33921]	-0.478409	0.811586	GSE227679
100302159	MIR548F3	microRNA 548f-3 [Source:HGNC Symbol;Acc:HGNC:35307]	2.74804		GSE227679
100302160	MIR1233-1	microRNA 1233-1 [Source:HGNC Symbol;Acc:HGNC:33929]	-0.942572		GSE227679
100302161	MIR1205	microRNA 1205 [Source:HGNC Symbol;Acc:HGNC:35271]	0.851267	0.718258	GSE227679
100302163	MIR1278	microRNA 1278 [Source:HGNC Symbol;Acc:HGNC:35356]	-1.08803		GSE227679
100302164	MIR2113	microRNA 2113 [Source:HGNC Symbol;Acc:HGNC:37058]			GSE227679
100302166	MIR1322	microRNA 1322 [Source:HGNC Symbol;Acc:HGNC:35374]	1.2338		GSE227679
100302167	MIR1299	microRNA 1299 [Source:HGNC Symbol;Acc:HGNC:35290]	0.152443	0.960208	GSE227679
100302168	MIR1257	microRNA 1257 [Source:HGNC Symbol;Acc:HGNC:35322]	1.8208		GSE227679
100302170	MIR1206	microRNA 1206 [Source:HGNC Symbol;Acc:HGNC:35272]	0.209035	0.93262	GSE227679
100302171	MIR1321	microRNA 1321 [Source:HGNC Symbol;Acc:HGNC:35373]			GSE227679
100302172	MIR1258	microRNA 1258 [Source:HGNC Symbol;Acc:HGNC:35323]			GSE227679
100302174	MIR1307	microRNA 1307 [Source:HGNC Symbol;Acc:HGNC:35372]	-0.828177	0.351298	GSE227679
100302175	MIR1207	microRNA 1207 [Source:HGNC Symbol;Acc:HGNC:35273]	-0.578135	0.80697	GSE227679
100302177	MIR1269A	microRNA 1269a [Source:HGNC Symbol;Acc:HGNC:35337]			GSE227679
100302178	MIR1295A	microRNA 1295a [Source:HGNC Symbol;Acc:HGNC:35288]	-1.87822		GSE227679
100302179	MIR1270	microRNA 1270 [Source:HGNC Symbol;Acc:HGNC:35338]	-0.705267		GSE227679
100302181	MIR1294	microRNA 1294 [Source:HGNC Symbol;Acc:HGNC:35287]	1.4894		GSE227679
100302182	MIR1279	microRNA 1279 [Source:HGNC Symbol;Acc:HGNC:35357]	-0.0479134	0.961063	GSE227679
100302183	MIR1825	microRNA 1825 [Source:HGNC Symbol;Acc:HGNC:35389]	0.62602	0.104651	GSE227679
100302184	MIR1272	microRNA 1272 [Source:HGNC Symbol;Acc:HGNC:35339]			GSE227679
100302185	MIR1204	microRNA 1204 [Source:HGNC Symbol;Acc:HGNC:37059]	1.33112	0.0949746	GSE227679
100302186	MIR548I3	microRNA 548i-3 [Source:HGNC Symbol;Acc:HGNC:35354]	0.130529		GSE227679
100302187	MIR1297	microRNA 1297 [Source:HGNC Symbol;Acc:HGNC:35289]			GSE227679
100302188	MIR1243	microRNA 1243 [Source:HGNC Symbol;Acc:HGNC:35304]	1.42581		GSE227679
100302190	MIR1976	microRNA 1976 [Source:HGNC Symbol;Acc:HGNC:37064]	0.754772		GSE227679
100302191	MIR548I4	microRNA 548i-4 [Source:HGNC Symbol;Acc:HGNC:35355]			GSE227679
100302192	MIR548F1	microRNA 548f-1 [Source:HGNC Symbol;Acc:HGNC:35305]			GSE227679
100302193	MIR1255A	microRNA 1255a [Source:HGNC Symbol;Acc:HGNC:35320]	0.0225746	0.992837	GSE227679
100302196	MIR1234	microRNA 1234 [Source:HGNC Symbol;Acc:HGNC:33926]	1.06097		GSE227679
100302197	MIR1306	microRNA 1306 [Source:HGNC Symbol;Acc:HGNC:35371]	-0.175899	0.75878	GSE227679
100302201	MIR1228	microRNA 1228 [Source:HGNC Symbol;Acc:HGNC:33928]	-0.570745	0.725593	GSE227679
100302202	MIR1266	microRNA 1266 [Source:HGNC Symbol;Acc:HGNC:35334]	1.33126		GSE227679
100302203	MIR1271	microRNA 1271 [Source:HGNC Symbol;Acc:HGNC:35252]	-2.09027		GSE227679
100302204	MIR548I1	microRNA 548i-1 [Source:HGNC Symbol;Acc:HGNC:35352]	-2.70416		GSE227679
100302205	MIR1283-2	microRNA 1283-2 [Source:HGNC Symbol;Acc:HGNC:35361]	0.310864		GSE227679
100302208	MIR1253	microRNA 1253 [Source:HGNC Symbol;Acc:HGNC:35318]	-2.21243		GSE227679
100302209	MIR1185-2	microRNA 1185-2 [Source:HGNC Symbol;Acc:HGNC:35254]	0.0156817		GSE227679
100302210	MIR1909	microRNA 1909 [Source:HGNC Symbol;Acc:HGNC:35393]	-0.123304	0.917169	GSE227679
100302211	MIR1203	microRNA 1203 [Source:HGNC Symbol;Acc:HGNC:35269]	0		GSE227679
100302212	MIR1324	microRNA 1324 [Source:HGNC Symbol;Acc:HGNC:35377]	-4.21307		GSE227679
100302213	MIR1181	microRNA 1181 [Source:HGNC Symbol;Acc:HGNC:35262]	-0.0168528	0.976887	GSE227679
100302214	MIR1277	microRNA 1277 [Source:HGNC Symbol;Acc:HGNC:35350]	-0.112587	0.975379	GSE227679
100302217	MIR1827	microRNA 1827 [Source:HGNC Symbol;Acc:HGNC:35391]	0.785333		GSE227679
100302218	MIR1285-1	microRNA 1285-1 [Source:HGNC Symbol;Acc:HGNC:35277]	-0.0331469	0.990621	GSE227679
100302219	MIR1245A	microRNA 1245a [Source:HGNC Symbol;Acc:HGNC:35311]	0.695437	0.524929	GSE227679
100302220	MIR1293	microRNA 1293 [Source:HGNC Symbol;Acc:HGNC:35286]	0.178565		GSE227679
100302221	MIR1291	microRNA 1291 [Source:HGNC Symbol;Acc:HGNC:35284]	1.12814	0.246279	GSE227679
100302222	MIR1911	microRNA 1911 [Source:HGNC Symbol;Acc:HGNC:35395]			GSE227679
100302223	MIR1302-8	microRNA 1302-8 [Source:HGNC Symbol;Acc:HGNC:35300]	0.968985		GSE227679
100302224	MIR2110	microRNA 2110 [Source:HGNC Symbol;Acc:HGNC:37071]	-0.273724	0.630527	GSE227679
100302225	MIR2053	microRNA 2053 [Source:HGNC Symbol;Acc:HGNC:37069]			GSE227679
100302226	MIR1238	microRNA 1238 [Source:HGNC Symbol;Acc:HGNC:33933]	0.408292		GSE227679
100302227	MIR1302-1	microRNA 1302-1 [Source:HGNC Symbol;Acc:HGNC:35293]			GSE227679
100302228	MIR1261	microRNA 1261 [Source:HGNC Symbol;Acc:HGNC:35327]	-3.03571		GSE227679
100302229	MIR1250	microRNA 1250 [Source:HGNC Symbol;Acc:HGNC:35316]	0.270261		GSE227679
100302232	MIR1226	microRNA 1226 [Source:HGNC Symbol;Acc:HGNC:33922]	-0.330308		GSE227679
100302233	MIR1268A	microRNA 1268a [Source:HGNC Symbol;Acc:HGNC:35336]			GSE227679
100302234	MIR664A	microRNA 664a [Source:HGNC Symbol;Acc:HGNC:35370]	-0.144219		GSE227679
100302235	MIR1179	microRNA 1179 [Source:HGNC Symbol;Acc:HGNC:35260]			GSE227679
100302236	MIR1260A	microRNA 1260a [Source:HGNC Symbol;Acc:HGNC:35325]			GSE227679
100302237	MIR1281	microRNA 1281 [Source:HGNC Symbol;Acc:HGNC:35359]	-0.334069	0.759851	GSE227679
100302238	MIR103B1	microRNA 103b-1 [Source:HGNC Symbol;Acc:HGNC:35384]	-1.05261		GSE227679
100302239	MIR548F5	microRNA 548f-5 [Source:HGNC Symbol;Acc:HGNC:35309]	-3.41345		GSE227679
100302240	MIR1304	microRNA 1304 [Source:HGNC Symbol;Acc:HGNC:35302]	0.65092	0.363762	GSE227679
100302242	MIR1236	microRNA 1236 [Source:HGNC Symbol;Acc:HGNC:33925]	-0.158456		GSE227679
100302243	MIR1972-1	microRNA 1972-1 [Source:HGNC Symbol;Acc:HGNC:37060]	-0.0657659	0.970795	GSE227679
100302246	MIR1301	microRNA 1301 [Source:HGNC Symbol;Acc:HGNC:35253]	0.665014		GSE227679
100302250	MIR1197	microRNA 1197 [Source:HGNC Symbol;Acc:HGNC:35376]	0.564109		GSE227679
100302251	MIR1264	microRNA 1264 [Source:HGNC Symbol;Acc:HGNC:35246]			GSE227679
100302254	MIR1282	microRNA 1282 [Source:HGNC Symbol;Acc:HGNC:35360]	0.45375	0.130814	GSE227679
100302255	MIR1323	microRNA 1323 [Source:HGNC Symbol;Acc:HGNC:35251]			GSE227679
100302256	MIR1180	microRNA 1180 [Source:HGNC Symbol;Acc:HGNC:35261]	-1.75443		GSE227679
100302257	MIR1539	microRNA 1539 [Source:HGNC Symbol;Acc:HGNC:35383]	0.130531		GSE227679
100302258	MIR1469	microRNA 1469 [Source:HGNC Symbol;Acc:HGNC:35378]	-1.81903		GSE227679
100302259	MIR1202	microRNA 1202 [Source:HGNC Symbol;Acc:HGNC:35268]	-2.57285		GSE227679
100302260	MIR2052	microRNA 2052 [Source:HGNC Symbol;Acc:HGNC:37068]	1.44249		GSE227679
100302261	MIR1910	microRNA 1910 [Source:HGNC Symbol;Acc:HGNC:35394]	0.797495		GSE227679
100302263	MIR1908	microRNA 1908 [Source:HGNC Symbol;Acc:HGNC:35392]	2.39489		GSE227679
100302265	MIR1283-1	microRNA 1283-1 [Source:HGNC Symbol;Acc:HGNC:35255]			GSE227679
100302267	MIR2054	microRNA 2054 [Source:HGNC Symbol;Acc:HGNC:37070]			GSE227679
100302268	MIR1285-2	microRNA 1285-2 [Source:HGNC Symbol;Acc:HGNC:35278]			GSE227679
100302270	MIR1305	microRNA 1305 [Source:HGNC Symbol;Acc:HGNC:35303]	-0.590808		GSE227679
100302274	MIR1178	microRNA 1178 [Source:HGNC Symbol;Acc:HGNC:35259]	0.589876	0.78133	GSE227679
100302275	MIR548L	microRNA 548l [Source:HGNC Symbol;Acc:HGNC:35292]	0.731597	0.81739	GSE227679
100302276	MIR1290	microRNA 1290 [Source:HGNC Symbol;Acc:HGNC:35283]	0.468294		GSE227679
100302277	MIR548I2	microRNA 548i-2 [Source:HGNC Symbol;Acc:HGNC:35353]	1.73709		GSE227679
100302278	MIR1302-2	microRNA 1302-2 [Source:HGNC Symbol;Acc:HGNC:35294]	-0.23014		GSE227679
100302279	MIR1262	microRNA 1262 [Source:HGNC Symbol;Acc:HGNC:35328]	-0.151492	0.954945	GSE227679
100302280	MIR1237	microRNA 1237 [Source:HGNC Symbol;Acc:HGNC:33927]	0.13053		GSE227679
100302281	MIR1208	microRNA 1208 [Source:HGNC Symbol;Acc:HGNC:35274]	2.24693		GSE227679
100302282	MIR103B2	microRNA 103b-2 [Source:HGNC Symbol;Acc:HGNC:35385]	-0.00949143		GSE227679
100302283	MIR1227	microRNA 1227 [Source:HGNC Symbol;Acc:HGNC:33932]	-1.04697		GSE227679
100302284	MIR1303	microRNA 1303 [Source:HGNC Symbol;Acc:HGNC:35301]	0.50652		GSE227679
100302285	MIR1244-1	microRNA 1244-1 [Source:HGNC Symbol;Acc:HGNC:35310]	0.16705	0.671091	GSE227679
100302286	MIR1267	microRNA 1267 [Source:HGNC Symbol;Acc:HGNC:35335]	-0.223046	0.947061	GSE227679
100302287	MIR548H3	microRNA 548h-3 [Source:HGNC Symbol;Acc:HGNC:35344]	-1.27596		GSE227679
100302288	MIR548P	microRNA 548p [Source:HGNC Symbol;Acc:HGNC:35351]	-0.0700667		GSE227679
100302289	MIR1251	microRNA 1251 [Source:HGNC Symbol;Acc:HGNC:35317]	0.00340177		GSE227679
100302290	MIR1973	microRNA 1973 [Source:HGNC Symbol;Acc:HGNC:37061]			GSE227679
100302401	RASAL2-AS1	RASAL2 antisense RNA 1 [Source:HGNC Symbol;Acc:HGNC:44170]	-0.421583	0.566686	GSE227679
100302522	PTCSC1	papillary thyroid carcinoma susceptibility candidate 1 [Source:HGNC Symbol;Acc:HGNC:37127]	0.92552	0.256594	GSE227679
100302652	ASB3	ankyrin repeat and SOCS box containing 3 [Source:HGNC Symbol;Acc:HGNC:16013]	-0.0144106	0.971491	GSE227679
100302691	LINC00184	long intergenic non-protein coding RNA 184 [Source:HGNC Symbol;Acc:HGNC:37192]	2.69499		GSE227679
100302692	FTX	FTX transcript, XIST regulator [Source:HGNC Symbol;Acc:HGNC:37190]	-0.227183	0.589166	GSE227679
100302736	TMED7-TICAM2	TMED7-TICAM2 readthrough [Source:HGNC Symbol;Acc:HGNC:33945]	0.418392	0.146771	GSE227679
100302743	SNORA80B	small nucleolar RNA, H/ACA box 80B [Source:HGNC Symbol;Acc:HGNC:34355]	0.271636	0.874901	GSE227679
100303491	ZEB2-AS1	ZEB2 antisense RNA 1 [Source:HGNC Symbol;Acc:HGNC:37149]	-0.242144	0.705468	GSE227679
100303728	SLC25A5-AS1	SLC25A5 antisense RNA 1 [Source:HGNC Symbol;Acc:HGNC:43438]	0.111719	0.804373	GSE227679
100303755	PET117	PET117 cytochrome c oxidase chaperone [Source:HGNC Symbol;Acc:HGNC:40045]	0.266388	0.292092	GSE227679
100310812	SPDYE2B	speedy/RINGO cell cycle regulator family member E2B [Source:HGNC Symbol;Acc:HGNC:48334]	-0.0195783	0.976614	GSE227679
100310846	ANKRD61	ankyrin repeat domain 61 [Source:HGNC Symbol;Acc:HGNC:22467]	0.0793372	0.926453	GSE227679
100313770	MIR548K	microRNA 548k [Source:HGNC Symbol;Acc:HGNC:35285]	-0.520817	0.842019	GSE227679
100313771	MIR548F2	microRNA 548f-2 [Source:HGNC Symbol;Acc:HGNC:35306]	0.457875	0.825002	GSE227679
100313772	MIR548M	microRNA 548m [Source:HGNC Symbol;Acc:HGNC:35331]			GSE227679
100313773	MIR548H2	microRNA 548h-2 [Source:HGNC Symbol;Acc:HGNC:35343]			GSE227679
100313774	MIR302E	microRNA 302e [Source:HGNC Symbol;Acc:HGNC:35348]			GSE227679
100313777	MIR670	microRNA 670 [Source:HGNC Symbol;Acc:HGNC:37304]			GSE227679
100313778	MIR759	microRNA 759 [Source:HGNC Symbol;Acc:HGNC:37307]			GSE227679
100313779	MIR2117	microRNA 2117 [Source:HGNC Symbol;Acc:HGNC:37311]	0.4912		GSE227679
100313780	MIR2278	microRNA 2278 [Source:HGNC Symbol;Acc:HGNC:37315]	-0.140956	0.944193	GSE227679
100313781	MIR718	microRNA 718 [Source:HGNC Symbol;Acc:HGNC:37317]			GSE227679
100313806	MIR1255B1	microRNA 1255b-1 [Source:HGNC Symbol;Acc:HGNC:35366]			GSE227679
100313822	MIR513B	microRNA 513b [Source:HGNC Symbol;Acc:HGNC:33935]			GSE227679
100313824	MIR663B	microRNA 663b [Source:HGNC Symbol;Acc:HGNC:35270]			GSE227679
100313829	MIR548O	microRNA 548o [Source:HGNC Symbol;Acc:HGNC:35333]	1.41971	0.522103	GSE227679
100313830	MIR548H1	microRNA 548h-1 [Source:HGNC Symbol;Acc:HGNC:35342]	0.79718	0.764235	GSE227679
100313835	MIR1255B2	microRNA 1255b-2 [Source:HGNC Symbol;Acc:HGNC:35367]	1.34411		GSE227679
100313837	MIR762	microRNA 762 [Source:HGNC Symbol;Acc:HGNC:37303]	-0.307624	0.642065	GSE227679
100313838	MIR764	microRNA 764 [Source:HGNC Symbol;Acc:HGNC:37306]			GSE227679
100313839	MIR2114	microRNA 2114 [Source:HGNC Symbol;Acc:HGNC:37308]			GSE227679
100313840	MIR2115	microRNA 2115 [Source:HGNC Symbol;Acc:HGNC:37309]			GSE227679
100313841	MIR548Q	microRNA 548q [Source:HGNC Symbol;Acc:HGNC:37312]	2.3133		GSE227679
100313842	MIR2276	microRNA 2276 [Source:HGNC Symbol;Acc:HGNC:37313]	-1.17589		GSE227679
100313843	MIR711	microRNA 711 [Source:HGNC Symbol;Acc:HGNC:37316]	0.0386833	0.984212	GSE227679
100313884	MIR548H4	microRNA 548h-4 [Source:HGNC Symbol;Acc:HGNC:35345]			GSE227679
100313886	MIR2116	microRNA 2116 [Source:HGNC Symbol;Acc:HGNC:37310]	0.592233	0.820147	GSE227679
100313887	MIR2277	microRNA 2277 [Source:HGNC Symbol;Acc:HGNC:37314]	-0.458659	0.676152	GSE227679
100313892	MIR761	microRNA 761 [Source:HGNC Symbol;Acc:HGNC:37305]	-0.14604	0.858796	GSE227679
100313895	MIR548F4	microRNA 548f-4 [Source:HGNC Symbol;Acc:HGNC:35308]			GSE227679
100313914	MIR548J	microRNA 548j [Source:HGNC Symbol;Acc:HGNC:35276]	2.52772		GSE227679
100313921	MIR548E	microRNA 548e [Source:HGNC Symbol;Acc:HGNC:35275]	0.245577	0.917914	GSE227679
100313923	MIR449C	microRNA 449c [Source:HGNC Symbol;Acc:HGNC:37302]	0		GSE227679
100313938	MIR548G	microRNA 548g [Source:HGNC Symbol;Acc:HGNC:35326]			GSE227679
100316904	SAP25	Sin3A associated protein 25 [Source:HGNC Symbol;Acc:HGNC:41908]	-0.408738	0.696401	GSE227679
100329135	TRPC5OS	TRPC5 opposite strand [Source:HGNC Symbol;Acc:HGNC:40593]	-1.21889		GSE227679
100337591	SNORA70F	small nucleolar RNA, H/ACA box 70F [Source:HGNC Symbol;Acc:HGNC:34358]	0.407018	0.835709	GSE227679
100359394	LINC00102	long intergenic non-protein coding RNA 102 [Source:HGNC Symbol;Acc:HGNC:30470]	0.484289	0.74173	GSE227679
10036	CHAF1A	chromatin assembly factor 1 subunit A [Source:HGNC Symbol;Acc:HGNC:1910]	0.593905	0.0397117	GSE227679
100379132	SNORA70G	small nucleolar RNA, H/ACA box 70G [Source:HGNC Symbol;Acc:HGNC:34359]	-0.0405916	0.973034	GSE227679
100379141	SNORA70D	small nucleolar RNA, H/ACA box 70D [Source:HGNC Symbol;Acc:HGNC:34356]	2.58585		GSE227679
100379174	MACROD2-AS1	MACROD2 antisense RNA 1 [Source:HGNC Symbol;Acc:HGNC:37193]	0.567817	0.786564	GSE227679
100379250	SNORA70E	small nucleolar RNA, H/ACA box 70E [Source:HGNC Symbol;Acc:HGNC:34357]	0.823515	0.617639	GSE227679
100379345	MIR181A2HG	MIR181A2 host gene [Source:HGNC Symbol;Acc:HGNC:37188]	-0.527837	0.765029	GSE227679
100379571	BACE1-AS	BACE1 antisense RNA [Source:HGNC Symbol;Acc:HGNC:37125]	-0.343526	0.528489	GSE227679
100379661	BACH1	BTB domain and CNC homolog 1 [Source:HGNC Symbol;Acc:HGNC:935]	0.109815	0.939101	GSE227679
10038	PARP2	poly(ADP-ribose) polymerase 2 [Source:HGNC Symbol;Acc:HGNC:272]	-0.0586735	0.938409	GSE227679
100381270	ZBED6	zinc finger BED-type containing 6 [Source:HGNC Symbol;Acc:HGNC:33273]	0.148437	0.544778	GSE227679
10039	PARP3	poly(ADP-ribose) polymerase family member 3 [Source:HGNC Symbol;Acc:HGNC:273]	-0.0885162	0.813689	GSE227679
1004	CDH6	cadherin 6 [Source:HGNC Symbol;Acc:HGNC:1765]	0.0817884	0.927246	GSE227679
10040	TOM1L1	target of myb1 like 1 membrane trafficking protein [Source:HGNC Symbol;Acc:HGNC:11983]	0.281685	0.626046	GSE227679
100419008	PRR20G	proline rich 20G [Source:HGNC Symbol;Acc:HGNC:53837]			GSE227679
100419743	DBET	D4Z4 binding element transcript [Source:HGNC Symbol;Acc:HGNC:43904]	1.50203		GSE227679
100419780	ZNF722	zinc finger protein 722 [Source:HGNC Symbol;Acc:HGNC:22571]	0		GSE227679
10042	HMGXB4	HMG-box containing 4 [Source:HGNC Symbol;Acc:HGNC:5003]	0.376978	0.0227245	GSE227679
100422737	LINC02532	long intergenic non-protein coding RNA 2532 [Source:HGNC Symbol;Acc:HGNC:53549]	4.94619		GSE227679
100422821	MIR1273C	microRNA 1273c [Source:HGNC Symbol;Acc:HGNC:38173]	-0.703862		GSE227679
100422823	MIR4300	microRNA 4300 [Source:HGNC Symbol;Acc:HGNC:38184]	1.44249		GSE227679
100422824	MIR3128	microRNA 3128 [Source:HGNC Symbol;Acc:HGNC:38188]	-1.21512	0.496821	GSE227679
100422825	MIR3160-2	microRNA 3160-2 [Source:HGNC Symbol;Acc:HGNC:38192]	0.671535		GSE227679
100422826	MIR4274	microRNA 4274 [Source:HGNC Symbol;Acc:HGNC:38194]	1.65161		GSE227679
100422827	MIR3160-1	microRNA 3160-1 [Source:HGNC Symbol;Acc:HGNC:38197]	0.671535		GSE227679
100422828	MIR4287	microRNA 4287 [Source:HGNC Symbol;Acc:HGNC:38208]	-1.53889		GSE227679
100422829	MIR4319	microRNA 4319 [Source:HGNC Symbol;Acc:HGNC:38212]	0.576846	0.778043	GSE227679
100422830	MIR3171	microRNA 3171 [Source:HGNC Symbol;Acc:HGNC:38216]	0		GSE227679
100422831	MIR1302-9	microRNA 1302-9 [Source:HGNC Symbol;Acc:HGNC:38218]	-0.23014		GSE227679
100422832	MIR3191	microRNA 3191 [Source:HGNC Symbol;Acc:HGNC:38222]	-0.0489576		GSE227679
100422833	MIR3188	microRNA 3188 [Source:HGNC Symbol;Acc:HGNC:38226]	-0.723253	0.734126	GSE227679
100422834	MIR1302-10	microRNA 1302-10 [Source:HGNC Symbol;Acc:HGNC:38233]	0.863856		GSE227679
100422835	MIR3183	microRNA 3183 [Source:HGNC Symbol;Acc:HGNC:38237]	-2.21071	0.260662	GSE227679
100422836	MIR3180-3	microRNA 3180-3 [Source:HGNC Symbol;Acc:HGNC:38239]	-1.21375		GSE227679
100422837	MIR1193	microRNA 1193 [Source:HGNC Symbol;Acc:HGNC:38247]	-2.07996		GSE227679
100422838	MIR3195	microRNA 3195 [Source:HGNC Symbol;Acc:HGNC:38250]			GSE227679
100422839	MIR3119-1	microRNA 3119-1 [Source:HGNC Symbol;Acc:HGNC:38253]			GSE227679
100422840	MIR4317	microRNA 4317 [Source:HGNC Symbol;Acc:HGNC:38260]	-1.12164	0.691561	GSE227679
100422841	MIR3174	microRNA 3174 [Source:HGNC Symbol;Acc:HGNC:38264]	0.316753	0.887835	GSE227679
100422842	MIR3074	microRNA 3074 [Source:HGNC Symbol;Acc:HGNC:38268]	-0.694885	0.414428	GSE227679
100422843	MIR4293	microRNA 4293 [Source:HGNC Symbol;Acc:HGNC:38270]			GSE227679
100422844	MIR3118-3	microRNA 3118-3 [Source:HGNC Symbol;Acc:HGNC:38274]			GSE227679
100422845	MIR1233-2	microRNA 1233-2 [Source:HGNC Symbol;Acc:HGNC:38277]	-1.21898		GSE227679
100422846	MIR3164	microRNA 3164 [Source:HGNC Symbol;Acc:HGNC:38288]	1.22069	0.659489	GSE227679
100422847	MIR514B	microRNA 514b [Source:HGNC Symbol;Acc:HGNC:38292]			GSE227679
100422848	MIR4283-2	microRNA 4283-2 [Source:HGNC Symbol;Acc:HGNC:38296]			GSE227679
100422849	MIR548T	microRNA 548t [Source:HGNC Symbol;Acc:HGNC:38298]	0.921583	0.73538	GSE227679
100422850	MIR548V	microRNA 548v [Source:HGNC Symbol;Acc:HGNC:38302]	-0.00351678	0.998166	GSE227679
100422851	MIR4316	microRNA 4316 [Source:HGNC Symbol;Acc:HGNC:38306]	-2.18398		GSE227679
100422852	MIR4259	microRNA 4259 [Source:HGNC Symbol;Acc:HGNC:38309]	-2.06527		GSE227679
100422853	MIR3182	microRNA 3182 [Source:HGNC Symbol;Acc:HGNC:38317]	-2.7826		GSE227679
100422854	MIR3187	microRNA 3187 [Source:HGNC Symbol;Acc:HGNC:38319]	1.0645		GSE227679
100422855	MIR4301	microRNA 4301 [Source:HGNC Symbol;Acc:HGNC:38323]			GSE227679
100422856	MIR3123	microRNA 3123 [Source:HGNC Symbol;Acc:HGNC:38330]	0		GSE227679
100422857	MIR4318	microRNA 4318 [Source:HGNC Symbol;Acc:HGNC:38333]			GSE227679
100422858	MIR4285	microRNA 4285 [Source:HGNC Symbol;Acc:HGNC:38337]	-0.890742		GSE227679
100422859	MIR3136	microRNA 3136 [Source:HGNC Symbol;Acc:HGNC:38340]	0.537396	0.773239	GSE227679
100422860	MIR4292	microRNA 4292 [Source:HGNC Symbol;Acc:HGNC:38348]	0.194818	0.89848	GSE227679
100422861	MIR4306	microRNA 4306 [Source:HGNC Symbol;Acc:HGNC:38350]	-1.25619		GSE227679
100422862	MIR548S	microRNA 548s [Source:HGNC Symbol;Acc:HGNC:38354]	-1.24947		GSE227679
100422863	MIR4265	microRNA 4265 [Source:HGNC Symbol;Acc:HGNC:38358]	-0.800845	0.733422	GSE227679
100422864	MIR544B	microRNA 544b [Source:HGNC Symbol;Acc:HGNC:38361]	-2.11982		GSE227679
100422865	MIR4320	microRNA 4320 [Source:HGNC Symbol;Acc:HGNC:38369]	-2.65586	0.160716	GSE227679
100422866	MIR3115	microRNA 3115 [Source:HGNC Symbol;Acc:HGNC:38371]	1.58536		GSE227679
100422867	MIR378C	microRNA 378c [Source:HGNC Symbol;Acc:HGNC:38374]			GSE227679
100422868	MIR4270	microRNA 4270 [Source:HGNC Symbol;Acc:HGNC:38377]			GSE227679
100422869	MIR3152	microRNA 3152 [Source:HGNC Symbol;Acc:HGNC:38379]	0.130529		GSE227679
100422870	MIR3180-1	microRNA 3180-1 [Source:HGNC Symbol;Acc:HGNC:38382]	-1.21375		GSE227679
100422871	MIR3117	microRNA 3117 [Source:HGNC Symbol;Acc:HGNC:38385]	0.646401	0.812841	GSE227679
100422872	MIR1244-3	microRNA 1244-3 [Source:HGNC Symbol;Acc:HGNC:38390]	-0.00900113	0.993255	GSE227679
100422873	MIR4297	microRNA 4297 [Source:HGNC Symbol;Acc:HGNC:38393]	-2.56181		GSE227679
100422874	MIR4279	microRNA 4279 [Source:HGNC Symbol;Acc:HGNC:38195]	-0.588798	0.776271	GSE227679
100422875	MIR3192	microRNA 3192 [Source:HGNC Symbol;Acc:HGNC:38202]	1.17236	0.699302	GSE227679
100422876	MIR3148	microRNA 3148 [Source:HGNC Symbol;Acc:HGNC:38215]			GSE227679
100422877	MIR3202-2	microRNA 3202-2 [Source:HGNC Symbol;Acc:HGNC:38228]			GSE227679
100422878	MIR3168	microRNA 3168 [Source:HGNC Symbol;Acc:HGNC:38249]	-1.15366		GSE227679
100422879	MIR3124	microRNA 3124 [Source:HGNC Symbol;Acc:HGNC:38262]	1.37848	0.299632	GSE227679
100422880	MIR3162	microRNA 3162 [Source:HGNC Symbol;Acc:HGNC:38271]	-0.45685		GSE227679
100422881	MIR3170	microRNA 3170 [Source:HGNC Symbol;Acc:HGNC:38282]	1.81185		GSE227679
100422882	MIR3120	microRNA 3120 [Source:HGNC Symbol;Acc:HGNC:38295]	0.477786	0.656002	GSE227679
100422883	MIR4325	microRNA 4325 [Source:HGNC Symbol;Acc:HGNC:38304]			GSE227679
100422884	MIR548U	microRNA 548u [Source:HGNC Symbol;Acc:HGNC:38316]	0.862586		GSE227679
100422885	MIR1244-2	microRNA 1244-2 [Source:HGNC Symbol;Acc:HGNC:38321]	0.0964756	0.845006	GSE227679
100422886	MIR3179-2	microRNA 3179-2 [Source:HGNC Symbol;Acc:HGNC:38325]	0.243062		GSE227679
100422887	MIR4280	microRNA 4280 [Source:HGNC Symbol;Acc:HGNC:38334]			GSE227679
100422888	MIR4264	microRNA 4264 [Source:HGNC Symbol;Acc:HGNC:38338]			GSE227679
100422889	MIR3194	microRNA 3194 [Source:HGNC Symbol;Acc:HGNC:38346]	-0.399934	0.905802	GSE227679
100422891	MIR4327	microRNA 4327 [Source:HGNC Symbol;Acc:HGNC:38355]			GSE227679
100422892	MIR3157	microRNA 3157 [Source:HGNC Symbol;Acc:HGNC:38172]	0.430727		GSE227679
100422893	MIR3154	microRNA 3154 [Source:HGNC Symbol;Acc:HGNC:38176]	-0.642927		GSE227679
100422894	MIR4260	microRNA 4260 [Source:HGNC Symbol;Acc:HGNC:38179]	-1.83184	0.0160352	GSE227679
100422895	MIR4294	microRNA 4294 [Source:HGNC Symbol;Acc:HGNC:38180]	-1.15366		GSE227679
100422896	MIR3140	microRNA 3140 [Source:HGNC Symbol;Acc:HGNC:38183]	-0.236405	0.852354	GSE227679
100422897	MIR4302	microRNA 4302 [Source:HGNC Symbol;Acc:HGNC:38185]			GSE227679
100422898	MIR4255	microRNA 4255 [Source:HGNC Symbol;Acc:HGNC:38187]			GSE227679
100422899	MIR3190	microRNA 3190 [Source:HGNC Symbol;Acc:HGNC:38190]	-0.0489576		GSE227679
100422900	MIR3158-1	microRNA 3158-1 [Source:HGNC Symbol;Acc:HGNC:38196]	1.72025		GSE227679
100422901	MIR3135A	microRNA 3135a [Source:HGNC Symbol;Acc:HGNC:38199]	0.127735		GSE227679
100422902	MIR3116-1	microRNA 3116-1 [Source:HGNC Symbol;Acc:HGNC:38200]	-0.590809		GSE227679
100422903	MIR4288	microRNA 4288 [Source:HGNC Symbol;Acc:HGNC:38203]	1.3859		GSE227679
100422904	MIR3193	microRNA 3193 [Source:HGNC Symbol;Acc:HGNC:38204]	-3.08834		GSE227679
100422905	MIR4311	microRNA 4311 [Source:HGNC Symbol;Acc:HGNC:38207]			GSE227679
100422907	MIR3156-2	microRNA 3156-2 [Source:HGNC Symbol;Acc:HGNC:38213]	1.27617		GSE227679
100422908	MIR3129	microRNA 3129 [Source:HGNC Symbol;Acc:HGNC:38217]	0.115228		GSE227679
100422909	MIR4295	microRNA 4295 [Source:HGNC Symbol;Acc:HGNC:38220]	-1.46766	0.530177	GSE227679
100422910	MIR2861	microRNA 2861 [Source:HGNC Symbol;Acc:HGNC:38221]	-0.59081		GSE227679
100422911	MIR500B	microRNA 500b [Source:HGNC Symbol;Acc:HGNC:38223]	0.310864		GSE227679
100422912	MIR3200	microRNA 3200 [Source:HGNC Symbol;Acc:HGNC:38227]	1.27617		GSE227679
100422914	MIR4253	microRNA 4253 [Source:HGNC Symbol;Acc:HGNC:38231]	0.888786	0.476393	GSE227679
100422915	MIR3065	microRNA 3065 [Source:HGNC Symbol;Acc:HGNC:38234]	0.837928		GSE227679
100422916	MIR3201	microRNA 3201 [Source:HGNC Symbol;Acc:HGNC:38235]			GSE227679
100422917	MIR4283-1	microRNA 4283-1 [Source:HGNC Symbol;Acc:HGNC:38238]			GSE227679
100422918	MIR3167	microRNA 3167 [Source:HGNC Symbol;Acc:HGNC:38242]	-0.59081		GSE227679
100422919	MIR1302-11	microRNA 1302-11 [Source:HGNC Symbol;Acc:HGNC:38246]	-0.23014		GSE227679
100422920	MIR548X	microRNA 548x [Source:HGNC Symbol;Acc:HGNC:38248]			GSE227679
100422921	MIR3149	microRNA 3149 [Source:HGNC Symbol;Acc:HGNC:38251]	-0.26252		GSE227679
100422922	MIR1972-2	microRNA 1972-2 [Source:HGNC Symbol;Acc:HGNC:38252]	0.259229	0.909741	GSE227679
100422923	MIR548W	microRNA 548w [Source:HGNC Symbol;Acc:HGNC:38255]	-2.08639		GSE227679
100422924	MIR4303	microRNA 4303 [Source:HGNC Symbol;Acc:HGNC:38256]			GSE227679
100422925	MIR4322	microRNA 4322 [Source:HGNC Symbol;Acc:HGNC:38261]	-0.193345		GSE227679
100422926	MIR3137	microRNA 3137 [Source:HGNC Symbol;Acc:HGNC:38263]	-2.32612		GSE227679
100422927	MIR4291	microRNA 4291 [Source:HGNC Symbol;Acc:HGNC:38267]			GSE227679
100422928	MIR3127	microRNA 3127 [Source:HGNC Symbol;Acc:HGNC:38269]	1.43552		GSE227679
100422929	MIR4261	microRNA 4261 [Source:HGNC Symbol;Acc:HGNC:38272]	-0.410474		GSE227679
100422930	MIR4330	microRNA 4330 [Source:HGNC Symbol;Acc:HGNC:38273]			GSE227679
100422931	MIR4304	microRNA 4304 [Source:HGNC Symbol;Acc:HGNC:38276]	-0.110675		GSE227679
100422932	MIR4328	microRNA 4328 [Source:HGNC Symbol;Acc:HGNC:38280]			GSE227679
100422933	MIR378B	microRNA 378b [Source:HGNC Symbol;Acc:HGNC:38283]	-2.42822		GSE227679
100422934	MIR3143	microRNA 3143 [Source:HGNC Symbol;Acc:HGNC:38284]	1.64102		GSE227679
100422935	MIR3118-4	microRNA 3118-4 [Source:HGNC Symbol;Acc:HGNC:38287]			GSE227679
100422936	MIR3153	microRNA 3153 [Source:HGNC Symbol;Acc:HGNC:38289]	5.8334	0.000716392	GSE227679
100422937	MIR4275	microRNA 4275 [Source:HGNC Symbol;Acc:HGNC:38293]	2.01236		GSE227679
100422938	MIR3142	microRNA 3142 [Source:HGNC Symbol;Acc:HGNC:38297]	-1.47944		GSE227679
100422939	MIR3147	microRNA 3147 [Source:HGNC Symbol;Acc:HGNC:38300]	1.39063		GSE227679
100422940	MIR4305	microRNA 4305 [Source:HGNC Symbol;Acc:HGNC:38301]	-0.266182	0.926453	GSE227679
100422941	MIR4272	microRNA 4272 [Source:HGNC Symbol;Acc:HGNC:38303]	-0.771144		GSE227679
100422942	MIR3133	microRNA 3133 [Source:HGNC Symbol;Acc:HGNC:38305]	-1.72846		GSE227679
100422943	MIR3189	microRNA 3189 [Source:HGNC Symbol;Acc:HGNC:38307]	3.81665		GSE227679
100422944	MIR3186	microRNA 3186 [Source:HGNC Symbol;Acc:HGNC:38311]	-0.21439	0.955996	GSE227679
100422945	MIR4326	microRNA 4326 [Source:HGNC Symbol;Acc:HGNC:38314]	-2.02247	0.408746	GSE227679
100422946	MIR3116-2	microRNA 3116-2 [Source:HGNC Symbol;Acc:HGNC:38318]	-0.771144		GSE227679
100422947	MIR3122	microRNA 3122 [Source:HGNC Symbol;Acc:HGNC:38320]	1.27617		GSE227679
100422948	MIR4284	microRNA 4284 [Source:HGNC Symbol;Acc:HGNC:38322]	1.47504		GSE227679
100422949	MIR3118-2	microRNA 3118-2 [Source:HGNC Symbol;Acc:HGNC:38324]			GSE227679
100422950	MIR3141	microRNA 3141 [Source:HGNC Symbol;Acc:HGNC:38326]			GSE227679
100422951	MIR3144	microRNA 3144 [Source:HGNC Symbol;Acc:HGNC:38331]	0.310864		GSE227679
100422952	MIR4271	microRNA 4271 [Source:HGNC Symbol;Acc:HGNC:38332]	0.790906	0.34135	GSE227679
100422953	MIR3165	microRNA 3165 [Source:HGNC Symbol;Acc:HGNC:38335]	-0.0556798		GSE227679
100422954	MIR4309	microRNA 4309 [Source:HGNC Symbol;Acc:HGNC:38336]			GSE227679
100422955	MIR4273	microRNA 4273 [Source:HGNC Symbol;Acc:HGNC:38339]	-0.589453	0.3264	GSE227679
100422956	MIR3180-2	microRNA 3180-2 [Source:HGNC Symbol;Acc:HGNC:38343]	-1.21375		GSE227679
100422957	MIR3131	microRNA 3131 [Source:HGNC Symbol;Acc:HGNC:38347]			GSE227679
100422959	MIR4268	microRNA 4268 [Source:HGNC Symbol;Acc:HGNC:38352]			GSE227679
100422960	MIR3179-1	microRNA 3179-1 [Source:HGNC Symbol;Acc:HGNC:38353]	-0.230137		GSE227679
100422961	MIR4315-2	microRNA 4315-2 [Source:HGNC Symbol;Acc:HGNC:38356]	-0.732324	0.142752	GSE227679
100422962	MIR4281	microRNA 4281 [Source:HGNC Symbol;Acc:HGNC:38357]			GSE227679
100422963	MIR4290	microRNA 4290 [Source:HGNC Symbol;Acc:HGNC:38360]			GSE227679
100422964	MIR3150A	microRNA 3150a [Source:HGNC Symbol;Acc:HGNC:38362]	0.130529		GSE227679
100422965	MIR4263	microRNA 4263 [Source:HGNC Symbol;Acc:HGNC:38365]	1.01053	0.554109	GSE227679
100422966	MIR4277	microRNA 4277 [Source:HGNC Symbol;Acc:HGNC:38367]			GSE227679
100422967	MIR3146	microRNA 3146 [Source:HGNC Symbol;Acc:HGNC:38368]	-2.56056		GSE227679
100422968	MIR4251	microRNA 4251 [Source:HGNC Symbol;Acc:HGNC:38370]	-1.25221		GSE227679
100422969	MIR2909	microRNA 2909 [Source:HGNC Symbol;Acc:HGNC:38372]	-0.800984		GSE227679
100422971	MIR4312	microRNA 4312 [Source:HGNC Symbol;Acc:HGNC:38376]	-0.176031	0.936106	GSE227679
100422972	MIR3181	microRNA 3181 [Source:HGNC Symbol;Acc:HGNC:38378]	-0.23014		GSE227679
100422973	MIR3169	microRNA 3169 [Source:HGNC Symbol;Acc:HGNC:38380]			GSE227679
100422974	MIR3178	microRNA 3178 [Source:HGNC Symbol;Acc:HGNC:38381]	-0.547841		GSE227679
100422975	MIR4252	microRNA 4252 [Source:HGNC Symbol;Acc:HGNC:38384]	0.891167		GSE227679
100422976	MIR4256	microRNA 4256 [Source:HGNC Symbol;Acc:HGNC:38388]	0.412729	0.861601	GSE227679
100422977	MIR1184-3	microRNA 1184-3 [Source:HGNC Symbol;Acc:HGNC:38389]	0.0446912	0.960179	GSE227679
100422978	MIR3185	microRNA 3185 [Source:HGNC Symbol;Acc:HGNC:38391]	0.85187		GSE227679
100422979	MIR4324	microRNA 4324 [Source:HGNC Symbol;Acc:HGNC:38392]	0.227827		GSE227679
100422980	MIR4323	microRNA 4323 [Source:HGNC Symbol;Acc:HGNC:38394]	-1.17189		GSE227679
100422981	MIR3173	microRNA 3173 [Source:HGNC Symbol;Acc:HGNC:38174]	-0.546727	0.776426	GSE227679
100422982	MIR4286	microRNA 4286 [Source:HGNC Symbol;Acc:HGNC:38186]	2.04408		GSE227679
100422983	MIR4314	microRNA 4314 [Source:HGNC Symbol;Acc:HGNC:38191]	-1.26856		GSE227679
100422984	MIR4308	microRNA 4308 [Source:HGNC Symbol;Acc:HGNC:38206]	1.369		GSE227679
100422985	MIR1184-2	microRNA 1184-2 [Source:HGNC Symbol;Acc:HGNC:38211]	-0.0546957	0.948924	GSE227679
100422986	MIR3125	microRNA 3125 [Source:HGNC Symbol;Acc:HGNC:38219]	-2.07179	0.401194	GSE227679
100422987	MIR3202-1	microRNA 3202-1 [Source:HGNC Symbol;Acc:HGNC:38224]	0.130529		GSE227679
100422988	MIR3156-1	microRNA 3156-1 [Source:HGNC Symbol;Acc:HGNC:38241]			GSE227679
100422989	MIR3155A	microRNA 3155a [Source:HGNC Symbol;Acc:HGNC:38245]	-0.0643914		GSE227679
100422990	MIR3134	microRNA 3134 [Source:HGNC Symbol;Acc:HGNC:38254]	0.421502	0.852173	GSE227679
100422991	MIR1260B	microRNA 1260b [Source:HGNC Symbol;Acc:HGNC:38258]	-1.67781	0.000633329	GSE227679
100422992	MIR3151	microRNA 3151 [Source:HGNC Symbol;Acc:HGNC:38266]	-1.82995		GSE227679
100422993	MIR3130-1	microRNA 3130-1 [Source:HGNC Symbol;Acc:HGNC:38275]	2.01937		GSE227679
100422994	MIR4267	microRNA 4267 [Source:HGNC Symbol;Acc:HGNC:38286]	1.03379		GSE227679
100422995	MIR3175	microRNA 3175 [Source:HGNC Symbol;Acc:HGNC:38299]	0.00210909	0.999364	GSE227679
100422996	MIR4262	microRNA 4262 [Source:HGNC Symbol;Acc:HGNC:38308]			GSE227679
100422997	MIR4257	microRNA 4257 [Source:HGNC Symbol;Acc:HGNC:38312]	-0.249717	0.885002	GSE227679
100422998	MIR3199-2	microRNA 3199-2 [Source:HGNC Symbol;Acc:HGNC:38205]			GSE227679
100422999	MIR4278	microRNA 4278 [Source:HGNC Symbol;Acc:HGNC:38243]	0.671535		GSE227679
100423000	MIR3161	microRNA 3161 [Source:HGNC Symbol;Acc:HGNC:38285]	0.0261008		GSE227679
100423001	MIR3145	microRNA 3145 [Source:HGNC Symbol;Acc:HGNC:38327]	1.01959		GSE227679
100423002	MIR3130-2	microRNA 3130-2 [Source:HGNC Symbol;Acc:HGNC:38363]	2.01937		GSE227679
100423003	MIR3184	microRNA 3184 [Source:HGNC Symbol;Acc:HGNC:38182]	-1.21751	0.443317	GSE227679
100423004	MIR4315-1	microRNA 4315-1 [Source:HGNC Symbol;Acc:HGNC:38342]	-0.323903	0.57598	GSE227679
100423005	MIR4282	microRNA 4282 [Source:HGNC Symbol;Acc:HGNC:38189]	0		GSE227679
100423006	MIR3179-3	microRNA 3179-3 [Source:HGNC Symbol;Acc:HGNC:38214]	0.242944		GSE227679
100423008	MIR3118-1	microRNA 3118-1 [Source:HGNC Symbol;Acc:HGNC:38265]	0.4912		GSE227679
100423009	MIR4329	microRNA 4329 [Source:HGNC Symbol;Acc:HGNC:38290]			GSE227679
100423010	MIR3119-2	microRNA 3119-2 [Source:HGNC Symbol;Acc:HGNC:38315]			GSE227679
100423011	MIR3138	microRNA 3138 [Source:HGNC Symbol;Acc:HGNC:38341]	-1.02856	0.540295	GSE227679
100423012	MIR3177	microRNA 3177 [Source:HGNC Symbol;Acc:HGNC:38364]	-0.626629	0.868271	GSE227679
100423013	MIR4310	microRNA 4310 [Source:HGNC Symbol;Acc:HGNC:38383]	-0.719012		GSE227679
100423014	MIR3196	microRNA 3196 [Source:HGNC Symbol;Acc:HGNC:38198]			GSE227679
100423015	MIR4289	microRNA 4289 [Source:HGNC Symbol;Acc:HGNC:38278]			GSE227679
100423016	MIR3159	microRNA 3159 [Source:HGNC Symbol;Acc:HGNC:38181]			GSE227679
100423017	MIR3139	microRNA 3139 [Source:HGNC Symbol;Acc:HGNC:38201]	-0.0298465		GSE227679
100423018	MIR3156-3	microRNA 3156-3 [Source:HGNC Symbol;Acc:HGNC:38229]			GSE227679
100423019	MIR4307	microRNA 4307 [Source:HGNC Symbol;Acc:HGNC:38257]	1.27617		GSE227679
100423020	MIR4258	microRNA 4258 [Source:HGNC Symbol;Acc:HGNC:38281]	0.314948		GSE227679
100423021	MIR4298	microRNA 4298 [Source:HGNC Symbol;Acc:HGNC:38313]	-2.47294		GSE227679
100423023	MIR3197	microRNA 3197 [Source:HGNC Symbol;Acc:HGNC:38366]	0.137635		GSE227679
100423025	MIR3198-1	microRNA 3198-1 [Source:HGNC Symbol;Acc:HGNC:38236]	-1.50754		GSE227679
100423026	MIR4299	microRNA 4299 [Source:HGNC Symbol;Acc:HGNC:38329]	1.34402		GSE227679
100423027	MIR4266	microRNA 4266 [Source:HGNC Symbol;Acc:HGNC:38175]	-1.01785		GSE227679
100423028	MIR4254	microRNA 4254 [Source:HGNC Symbol;Acc:HGNC:38193]	0.194663		GSE227679
100423029	MIR3163	microRNA 3163 [Source:HGNC Symbol;Acc:HGNC:38209]	-1.22455		GSE227679
100423030	MIR3126	microRNA 3126 [Source:HGNC Symbol;Acc:HGNC:38225]	0.520219	0.819646	GSE227679
100423031	MIR4321	microRNA 4321 [Source:HGNC Symbol;Acc:HGNC:38244]	1.64851		GSE227679
100423032	MIR3121	microRNA 3121 [Source:HGNC Symbol;Acc:HGNC:38259]	1.43649		GSE227679
100423033	MIR3158-2	microRNA 3158-2 [Source:HGNC Symbol;Acc:HGNC:38279]	1.72025		GSE227679
100423034	MIR3199-1	microRNA 3199-1 [Source:HGNC Symbol;Acc:HGNC:38294]			GSE227679
100423035	MIR4313	microRNA 4313 [Source:HGNC Symbol;Acc:HGNC:38310]	-2.35492		GSE227679
100423036	MIR2355	microRNA 2355 [Source:HGNC Symbol;Acc:HGNC:38328]	0.16127	0.916729	GSE227679
100423037	MIR3176	microRNA 3176 [Source:HGNC Symbol;Acc:HGNC:38345]	-0.0635167	0.97239	GSE227679
100423038	MIR466	microRNA 466 [Source:HGNC Symbol;Acc:HGNC:38359]			GSE227679
100423039	MIR3132	microRNA 3132 [Source:HGNC Symbol;Acc:HGNC:38373]	-1.56622		GSE227679
100423040	MIR3166	microRNA 3166 [Source:HGNC Symbol;Acc:HGNC:38386]			GSE227679
100423041	MIR4296	microRNA 4296 [Source:HGNC Symbol;Acc:HGNC:38178]	-0.660079	0.615186	GSE227679
100423042	MIR4276	microRNA 4276 [Source:HGNC Symbol;Acc:HGNC:38232]			GSE227679
100423043	MIR4269	microRNA 4269 [Source:HGNC Symbol;Acc:HGNC:38291]	-1.11803	0.589166	GSE227679
100423062	IGLL5	immunoglobulin lambda like polypeptide 5 [Source:HGNC Symbol;Acc:HGNC:38476]	0.259046	0.870517	GSE227679
10043	TOM1	target of myb1 membrane trafficking protein [Source:HGNC Symbol;Acc:HGNC:11982]	0.318322	0.264806	GSE227679
100431172	KLRF2	killer cell lectin like receptor F2 [Source:HGNC Symbol;Acc:HGNC:37646]	3.58384		GSE227679
10044	SH2D3C	SH2 domain containing 3C [Source:HGNC Symbol;Acc:HGNC:16884]	-0.413729	0.505518	GSE227679
10045	SH2D3A	SH2 domain containing 3A [Source:HGNC Symbol;Acc:HGNC:16885]	-0.225847	0.78923	GSE227679
10046	MAMLD1	mastermind like domain containing 1 [Source:HGNC Symbol;Acc:HGNC:2568]	0.114719	0.90697	GSE227679
10047	CST8	cystatin 8 [Source:HGNC Symbol;Acc:HGNC:2480]	0		GSE227679
10048	RANBP9	RAN binding protein 9 [Source:HGNC Symbol;Acc:HGNC:13727]	0.480225	0.00879062	GSE227679
10049	DNAJB6	DnaJ heat shock protein family (Hsp40) member B6 [Source:HGNC Symbol;Acc:HGNC:14888]	-0.113051	0.797342	GSE227679
100499171	LINC00276	long intergenic non-protein coding RNA 276 [Source:HGNC Symbol;Acc:HGNC:38663]	0.849635		GSE227679
100499405	LINC00987	long intergenic non-protein coding RNA 987 [Source:HGNC Symbol;Acc:HGNC:48911]	-0.877224	0.0255122	GSE227679
100499467	LINC00511	long intergenic non-protein coding RNA 511 [Source:HGNC Symbol;Acc:HGNC:43564]	1.01795	0.306795	GSE227679
100499483	CCDC180	coiled-coil domain containing 180 [Source:HGNC Symbol;Acc:HGNC:29303]	-0.699475	0.0753888	GSE227679
100499484	SUGT1P4-STRA6LP	SUGT1P4-STRA6LP readthrough [Source:HGNC Symbol;Acc:HGNC:53834]	-0.335298	0.585556	GSE227679
1005	CDH7	cadherin 7 [Source:HGNC Symbol;Acc:HGNC:1766]	2.54011		GSE227679
10050	SLC17A4	solute carrier family 17 member 4 [Source:HGNC Symbol;Acc:HGNC:10932]	1.2199		GSE227679
100500801	MIR3659	microRNA 3659 [Source:HGNC Symbol;Acc:HGNC:38882]	1.02271		GSE227679
100500802	MIR3685	microRNA 3685 [Source:HGNC Symbol;Acc:HGNC:38886]	0.789464	0.640365	GSE227679
100500803	MIR3919	microRNA 3919 [Source:HGNC Symbol;Acc:HGNC:38890]			GSE227679
100500804	MIR3654	microRNA 3654 [Source:HGNC Symbol;Acc:HGNC:38896]	-0.316506	0.358846	GSE227679
100500807	MIR374C	microRNA 374c [Source:HGNC Symbol;Acc:HGNC:38907]	-0.0997509	0.904432	GSE227679
100500808	MIR3917	microRNA 3917 [Source:HGNC Symbol;Acc:HGNC:38911]	0.858437	0.0991849	GSE227679
100500809	MIR23C	microRNA 23c [Source:HGNC Symbol;Acc:HGNC:38913]	0.130529		GSE227679
100500810	MIR3620	microRNA 3620 [Source:HGNC Symbol;Acc:HGNC:38917]	-0.202168	0.862869	GSE227679
100500811	MIR3621	microRNA 3621 [Source:HGNC Symbol;Acc:HGNC:38930]	-0.590809		GSE227679
100500812	MIR3677	microRNA 3677 [Source:HGNC Symbol;Acc:HGNC:38932]	-0.350076		GSE227679
100500813	MIR3646	microRNA 3646 [Source:HGNC Symbol;Acc:HGNC:38935]			GSE227679
100500814	MIR3616	microRNA 3616 [Source:HGNC Symbol;Acc:HGNC:38943]	-3.1012		GSE227679
100500816	MIR3649	microRNA 3649 [Source:HGNC Symbol;Acc:HGNC:38948]	-3.3013		GSE227679
100500817	MIR3612	microRNA 3612 [Source:HGNC Symbol;Acc:HGNC:38951]	-2.97568	0.169479	GSE227679
100500818	MIR3945	microRNA 3945 [Source:HGNC Symbol;Acc:HGNC:38954]	-0.0498022		GSE227679
100500819	MIR3609	microRNA 3609 [Source:HGNC Symbol;Acc:HGNC:38956]	-0.140756	0.886126	GSE227679
100500820	MIR3655	microRNA 3655 [Source:HGNC Symbol;Acc:HGNC:38960]	0.284806	0.313992	GSE227679
100500821	MIR3910-1	microRNA 3910-1 [Source:HGNC Symbol;Acc:HGNC:38966]	0.312453		GSE227679
100500822	MIR3937	microRNA 3937 [Source:HGNC Symbol;Acc:HGNC:38970]			GSE227679
100500823	MIR3920	microRNA 3920 [Source:HGNC Symbol;Acc:HGNC:38974]	-0.822219		GSE227679
100500824	MIR3650	microRNA 3650 [Source:HGNC Symbol;Acc:HGNC:38981]	-0.82302	0.474909	GSE227679
100500825	MIR3660	microRNA 3660 [Source:HGNC Symbol;Acc:HGNC:38985]			GSE227679
100500826	MIR3909	microRNA 3909 [Source:HGNC Symbol;Acc:HGNC:38987]	-0.396528	0.847742	GSE227679
100500827	MIR3614	microRNA 3614 [Source:HGNC Symbol;Acc:HGNC:38995]	0.266088	0.553286	GSE227679
100500828	MIR3619	microRNA 3619 [Source:HGNC Symbol;Acc:HGNC:38998]	0.317761	0.814937	GSE227679
100500829	MIR3943	microRNA 3943 [Source:HGNC Symbol;Acc:HGNC:38888]	0.85187		GSE227679
100500830	MIR550B2	microRNA 550b-2 [Source:HGNC Symbol;Acc:HGNC:38910]	-0.687276	0.665798	GSE227679
100500831	MIR3912	microRNA 3912 [Source:HGNC Symbol;Acc:HGNC:38923]	0.85187		GSE227679
100500832	MIR3658	microRNA 3658 [Source:HGNC Symbol;Acc:HGNC:38963]	-0.706919	0.263144	GSE227679
100500834	MIR3924	microRNA 3924 [Source:HGNC Symbol;Acc:HGNC:38984]			GSE227679
100500835	MIR3907	microRNA 3907 [Source:HGNC Symbol;Acc:HGNC:38988]	-1.33516		GSE227679
100500836	MIR3914-1	microRNA 3914-1 [Source:HGNC Symbol;Acc:HGNC:38993]	-0.771144		GSE227679
100500837	MIR3606	microRNA 3606 [Source:HGNC Symbol;Acc:HGNC:38881]	2.25498	0.00027885	GSE227679
100500838	MIR3926-2	microRNA 3926-2 [Source:HGNC Symbol;Acc:HGNC:38883]	-2.39556		GSE227679
100500839	MIR3686	microRNA 3686 [Source:HGNC Symbol;Acc:HGNC:38887]	0.310864		GSE227679
100500841	MIR3678	microRNA 3678 [Source:HGNC Symbol;Acc:HGNC:38891]			GSE227679
100500842	MIR3652	microRNA 3652 [Source:HGNC Symbol;Acc:HGNC:38894]	0.176375	0.697711	GSE227679
100500843	MIR3922	microRNA 3922 [Source:HGNC Symbol;Acc:HGNC:38895]	-0.410473		GSE227679
100500844	MIR3664	microRNA 3664 [Source:HGNC Symbol;Acc:HGNC:38899]	-0.428622		GSE227679
100500845	MIR642B	microRNA 642b [Source:HGNC Symbol;Acc:HGNC:38902]	1.13712		GSE227679
100500846	MIR3689A	microRNA 3689a [Source:HGNC Symbol;Acc:HGNC:38904]			GSE227679
100500847	MIR3615	microRNA 3615 [Source:HGNC Symbol;Acc:HGNC:38905]	0.641064	0.514938	GSE227679
100500849	MIR3916	microRNA 3916 [Source:HGNC Symbol;Acc:HGNC:38912]	0.192968	0.660909	GSE227679
100500850	MIR3682	microRNA 3682 [Source:HGNC Symbol;Acc:HGNC:38916]	-1.18873	0.14059	GSE227679
100500851	MIR3918	microRNA 3918 [Source:HGNC Symbol;Acc:HGNC:38919]	0.108467	0.925781	GSE227679
100500852	MIR3180-4	microRNA 3180-4 [Source:HGNC Symbol;Acc:HGNC:38920]			GSE227679
100500853	MIR3605	microRNA 3605 [Source:HGNC Symbol;Acc:HGNC:38922]	0.0745645	0.882842	GSE227679
100500854	MIR3671	microRNA 3671 [Source:HGNC Symbol;Acc:HGNC:38925]	-0.320565	0.682443	GSE227679
100500855	MIR3713	microRNA 3713 [Source:HGNC Symbol;Acc:HGNC:38926]	0.971823		GSE227679
100500856	MIR548Z	microRNA 548z [Source:HGNC Symbol;Acc:HGNC:38929]	-0.950591		GSE227679
100500857	MIR3939	microRNA 3939 [Source:HGNC Symbol;Acc:HGNC:38931]	-0.623681	0.755077	GSE227679
100500858	MIR3622A	microRNA 3622a [Source:HGNC Symbol;Acc:HGNC:38934]	0.772871		GSE227679
100500859	MIR3921	microRNA 3921 [Source:HGNC Symbol;Acc:HGNC:38936]	-2.52928		GSE227679
100500860	MIR3618	microRNA 3618 [Source:HGNC Symbol;Acc:HGNC:38937]	0.305391	0.678672	GSE227679
100500861	MIR3665	microRNA 3665 [Source:HGNC Symbol;Acc:HGNC:38939]	-0.049803		GSE227679
100500862	MIR3648-1	microRNA 3648-1 [Source:HGNC Symbol;Acc:HGNC:38941]	-0.636707	0.611318	GSE227679
100500863	MIR548AA1	microRNA 548aa-1 [Source:HGNC Symbol;Acc:HGNC:38944]	3.59456		GSE227679
100500864	MIR3929	microRNA 3929 [Source:HGNC Symbol;Acc:HGNC:38945]	3.82193		GSE227679
100500865	MIR3936	microRNA 3936 [Source:HGNC Symbol;Acc:HGNC:38947]	0.178063	0.917544	GSE227679
100500866	MIR3941	microRNA 3941 [Source:HGNC Symbol;Acc:HGNC:38949]	-2.55418		GSE227679
100500867	MIR3684	microRNA 3684 [Source:HGNC Symbol;Acc:HGNC:38950]	-1.15546	0.676236	GSE227679
100500868	MIR3913-2	microRNA 3913-2 [Source:HGNC Symbol;Acc:HGNC:38953]			GSE227679
100500869	MIR3672	microRNA 3672 [Source:HGNC Symbol;Acc:HGNC:38957]			GSE227679
100500870	MIR3926-1	microRNA 3926-1 [Source:HGNC Symbol;Acc:HGNC:38959]	-2.39556		GSE227679
100500871	MIR3622B	microRNA 3622b [Source:HGNC Symbol;Acc:HGNC:38961]	1.1306		GSE227679
100500872	MIR3911	microRNA 3911 [Source:HGNC Symbol;Acc:HGNC:38962]	-0.771745	0.358579	GSE227679
100500873	MIR3934	microRNA 3934 [Source:HGNC Symbol;Acc:HGNC:38965]	-0.432903	0.810226	GSE227679
100500875	MIR3938	microRNA 3938 [Source:HGNC Symbol;Acc:HGNC:38972]	0.310864		GSE227679
100500876	MIR3675	microRNA 3675 [Source:HGNC Symbol;Acc:HGNC:38973]	0.130529		GSE227679
100500877	MIR3923	microRNA 3923 [Source:HGNC Symbol;Acc:HGNC:38978]			GSE227679
100500878	MIR3679	microRNA 3679 [Source:HGNC Symbol;Acc:HGNC:38979]	0.280307		GSE227679
100500879	MIR3668	microRNA 3668 [Source:HGNC Symbol;Acc:HGNC:38982]			GSE227679
100500880	MIR3662	microRNA 3662 [Source:HGNC Symbol;Acc:HGNC:38983]	0.0906467	0.969388	GSE227679
100500881	MIR3688-1	microRNA 3688-1 [Source:HGNC Symbol;Acc:HGNC:38986]	-1.59291		GSE227679
100500882	MIR3667	microRNA 3667 [Source:HGNC Symbol;Acc:HGNC:38990]	0		GSE227679
100500883	MIR550B1	microRNA 550b-1 [Source:HGNC Symbol;Acc:HGNC:38992]	-0.0775696	0.970115	GSE227679
100500884	MIR3681	microRNA 3681 [Source:HGNC Symbol;Acc:HGNC:38994]			GSE227679
100500885	MIR3925	microRNA 3925 [Source:HGNC Symbol;Acc:HGNC:38996]	0.130529		GSE227679
100500886	MIR3683	microRNA 3683 [Source:HGNC Symbol;Acc:HGNC:38999]	-0.59081		GSE227679
100500887	MIR676	microRNA 676 [Source:HGNC Symbol;Acc:HGNC:38880]	-2.26344		GSE227679
100500888	MIR3940	microRNA 3940 [Source:HGNC Symbol;Acc:HGNC:38893]	0.0742225	0.902177	GSE227679
100500889	MIR3657	microRNA 3657 [Source:HGNC Symbol;Acc:HGNC:38906]	0.430473	0.787118	GSE227679
100500890	MIR3611	microRNA 3611 [Source:HGNC Symbol;Acc:HGNC:38914]	1.2414		GSE227679
100500891	MIR3935	microRNA 3935 [Source:HGNC Symbol;Acc:HGNC:38918]	0		GSE227679
100500893	MIR3663	microRNA 3663 [Source:HGNC Symbol;Acc:HGNC:38958]			GSE227679
100500894	MIR3690	microRNA 3690 [Source:HGNC Symbol;Acc:HGNC:38967]	0.06061		GSE227679
100500895	MIR548AA2	microRNA 548aa-2 [Source:HGNC Symbol;Acc:HGNC:38921]	0.317123	0.911951	GSE227679
100500896	MIR3666	microRNA 3666 [Source:HGNC Symbol;Acc:HGNC:38940]	0		GSE227679
100500897	MIR3617	microRNA 3617 [Source:HGNC Symbol;Acc:HGNC:38977]	1.21529		GSE227679
100500898	MIR3927	microRNA 3927 [Source:HGNC Symbol;Acc:HGNC:38901]	1.03379		GSE227679
100500899	MIR3692	microRNA 3692 [Source:HGNC Symbol;Acc:HGNC:38885]	-1.92233		GSE227679
100500900	MIR3691	microRNA 3691 [Source:HGNC Symbol;Acc:HGNC:38909]	2.98361		GSE227679
100500901	MIR3928	microRNA 3928 [Source:HGNC Symbol;Acc:HGNC:38933]	-1.80271		GSE227679
100500902	MIR3910-2	microRNA 3910-2 [Source:HGNC Symbol;Acc:HGNC:38952]	0.312453		GSE227679
100500903	MIR3913-1	microRNA 3913-1 [Source:HGNC Symbol;Acc:HGNC:38884]			GSE227679
100500904	MIR3942	microRNA 3942 [Source:HGNC Symbol;Acc:HGNC:38976]	-0.336164	0.812192	GSE227679
100500905	MIR3661	microRNA 3661 [Source:HGNC Symbol;Acc:HGNC:38892]	-0.0757786	0.870875	GSE227679
100500906	MIR3689B	microRNA 3689b [Source:HGNC Symbol;Acc:HGNC:38924]	-0.410474		GSE227679
100500907	MIR3150B	microRNA 3150b [Source:HGNC Symbol;Acc:HGNC:38938]	0.4912		GSE227679
100500908	MIR3613	microRNA 3613 [Source:HGNC Symbol;Acc:HGNC:38964]	-0.637616		GSE227679
100500909	MIR3908	microRNA 3908 [Source:HGNC Symbol;Acc:HGNC:38991]			GSE227679
100500910	MIR3670-1	microRNA 3670-1 [Source:HGNC Symbol;Acc:HGNC:38997]	-0.771143		GSE227679
100500911	MIR3944	microRNA 3944 [Source:HGNC Symbol;Acc:HGNC:38898]	0.4912		GSE227679
100500912	MIR3674	microRNA 3674 [Source:HGNC Symbol;Acc:HGNC:38915]	1.44724		GSE227679
100500913	MIR3714	microRNA 3714 [Source:HGNC Symbol;Acc:HGNC:38928]	-0.578809	0.741562	GSE227679
100500914	MIR3610	microRNA 3610 [Source:HGNC Symbol;Acc:HGNC:38942]	0.532239		GSE227679
100500915	MIR3915	microRNA 3915 [Source:HGNC Symbol;Acc:HGNC:38955]	-0.525732		GSE227679
100500916	MIR3180-5	microRNA 3180-5 [Source:HGNC Symbol;Acc:HGNC:38969]			GSE227679
100500917	MIR3680-1	microRNA 3680-1 [Source:HGNC Symbol;Acc:HGNC:38989]	-0.162708	0.929328	GSE227679
100500918	MIR3651	microRNA 3651 [Source:HGNC Symbol;Acc:HGNC:38897]	1.41166	0.155403	GSE227679
100500919	MIR548Y	microRNA 548y [Source:HGNC Symbol;Acc:HGNC:38980]	-2.0899		GSE227679
100500920	MIR3914-2	microRNA 3914-2 [Source:HGNC Symbol;Acc:HGNC:38975]	-0.771144		GSE227679
100500938	CCDC179	coiled-coil domain containing 179 [Source:HGNC Symbol;Acc:HGNC:44653]	0.483615	0.866481	GSE227679
100505385	IQCJ-SCHIP1	IQCJ-SCHIP1 readthrough [Source:HGNC Symbol;Acc:HGNC:38842]	-1.00682	0.00370802	GSE227679
100505474	LINC01539	long intergenic non-protein coding RNA 1539 [Source:HGNC Symbol;Acc:HGNC:51307]	1.21535		GSE227679
100505477	LINC01602	long intergenic non-protein coding RNA 1602 [Source:HGNC Symbol;Acc:HGNC:51634]	0.310864		GSE227679
100505478	TEX48	testis expressed 48 [Source:HGNC Symbol;Acc:HGNC:52393]	-0.548094	0.828098	GSE227679
100505495	PCAT19	prostate cancer associated transcript 19 [Source:HGNC Symbol;Acc:HGNC:49593]	-0.613462	0.410103	GSE227679
100505501	TOX-DT	TOX divergent transcript [Source:HGNC Symbol;Acc:HGNC:55935]	-0.213548	0.874591	GSE227679
100505515	LINC01723	long intergenic non-protein coding RNA 1723 [Source:HGNC Symbol;Acc:HGNC:52511]			GSE227679
100505534	GPR176-DT	GPR176 divergent transcript [Source:HGNC Symbol;Acc:HGNC:54389]	-2.43305		GSE227679
100505538	RBM26-AS1	RBM26 antisense RNA 1 [Source:HGNC Symbol;Acc:HGNC:39805]	-0.361009	0.553601	GSE227679
100505540	SLIT1-AS1	SLIT1 antisense RNA 1 [Source:HGNC Symbol;Acc:HGNC:51198]	0.400948		GSE227679
100505545	LINC01095	long intergenic non-protein coding RNA 1095 [Source:HGNC Symbol;Acc:HGNC:49220]	-0.410475		GSE227679
100505549	ATP8B1-AS1	ATP8B1 antisense RNA 1 [Source:HGNC Symbol;Acc:HGNC:56042]	0.0687673	0.850421	GSE227679
100505555	ZNF846	zinc finger protein 846 [Source:HGNC Symbol;Acc:HGNC:27260]	-0.750878	0.595377	GSE227679
100505561	GOLGA7B-DT	GOLGA7B divergent transcript [Source:HGNC Symbol;Acc:HGNC:45232]	-0.528602		GSE227679
100505566	LINC00578	long intergenic non-protein coding RNA 578 [Source:HGNC Symbol;Acc:HGNC:43807]	0.91397	0.500301	GSE227679
100505573	INAFM2	InaF motif containing 2 [Source:HGNC Symbol;Acc:HGNC:35165]	-0.429491	0.0666538	GSE227679
100505576	LASP1NB	LASP1 neighbor [Source:HGNC Symbol;Acc:HGNC:44353]	0.429817	0.616287	GSE227679
100505583	LINC00838	long intergenic non-protein coding RNA 838 [Source:HGNC Symbol;Acc:HGNC:44963]	-0.951479		GSE227679
100505588	LHX2-AS1	LHX2 antisense RNA 1 [Source:HGNC Symbol;Acc:HGNC:56163]	-0.59081		GSE227679
100505591	LRRC3C	leucine rich repeat containing 3C [Source:HGNC Symbol;Acc:HGNC:40034]	-0.961479	0.391882	GSE227679
100505592	GAPLINC	gastric adenocarcinoma associated, positive CD44 regulator, long intergenic non-coding RNA [Source:HGNC Symbol;Acc:HGNC:51308]	1.48901	0.0936802	GSE227679
100505609	LINC02053	long intergenic non-protein coding RNA 2053 [Source:HGNC Symbol;Acc:HGNC:52893]	0.4912		GSE227679
100505616	SNHG21	small nucleolar RNA host gene 21 [Source:HGNC Symbol;Acc:HGNC:50284]	-0.208939	0.777405	GSE227679
100505619	LINC00919	long intergenic non-protein coding RNA 919 [Source:HGNC Symbol;Acc:HGNC:48610]			GSE227679
100505621	NDUFV1-DT	NDUFV1 divergent transcript [Source:HGNC Symbol;Acc:HGNC:26915]	-0.632414		GSE227679
100505624	GTF3C2-AS1	GTF3C2 antisense RNA 1 [Source:HGNC Symbol;Acc:HGNC:40269]	-0.0106347	0.97924	GSE227679
100505625	LINC02102	long intergenic non-protein coding RNA 2102 [Source:HGNC Symbol;Acc:HGNC:52957]	0.278577	0.89533	GSE227679
100505635	DAAM2-AS1	DAAM2 antisense RNA 1 [Source:HGNC Symbol;Acc:HGNC:40830]	-0.596257	0.415355	GSE227679
100505641	FGD5-AS1	FGD5 antisense RNA 1 [Source:HGNC Symbol;Acc:HGNC:40410]	0.192967	0.422801	GSE227679
100505648	RAD51-AS1	RAD51 antisense RNA 1 [Source:HGNC Symbol;Acc:HGNC:48621]	-0.504387	0.417907	GSE227679
100505658	DIAPH1-AS1	DIAPH1 antisense RNA 1 [Source:HGNC Symbol;Acc:HGNC:40177]	0.0556629	0.951685	GSE227679
100505664	LINC03125	long intergenic non-protein coding RNA 3125 [Source:HGNC Symbol;Acc:HGNC:57012]	1.40232		GSE227679
100505676	RRS1-DT	RRS1 divergent transcript [Source:HGNC Symbol;Acc:HGNC:50465]	0.0762064	0.961168	GSE227679
100505678	STARD4-AS1	STARD4 antisense RNA 1 [Source:HGNC Symbol;Acc:HGNC:44117]	1.12506	0.00156576	GSE227679
100505685	LINC03074	long intergenic non-protein coding RNA 3074 [Source:HGNC Symbol;Acc:HGNC:56654]			GSE227679
100505687	SNHG33	small nucleolar RNA host gene 33 [Source:HGNC Symbol;Acc:HGNC:48575]	-0.902318	0.0271995	GSE227679
100505696	SH3BP5-AS1	SH3BP5 antisense RNA 1 [Source:HGNC Symbol;Acc:HGNC:44501]	-0.221487	0.589617	GSE227679
100505718	LINC01592	long intergenic non-protein coding RNA 1592 [Source:HGNC Symbol;Acc:HGNC:51557]	1.71461		GSE227679
100505724	KRTAP9-7	keratin associated protein 9-7 [Source:HGNC Symbol;Acc:HGNC:18915]			GSE227679
100505738	MIR4458HG	MIR4458 host gene [Source:HGNC Symbol;Acc:HGNC:49008]	-0.525516	0.445793	GSE227679
100505741	SPATA1	spermatogenesis associated 1 [Source:HGNC Symbol;Acc:HGNC:14682]	-0.127652	0.801673	GSE227679
100505746	ITGB2-AS1	ITGB2 antisense RNA 1 [Source:HGNC Symbol;Acc:HGNC:44304]	0.366087	0.554301	GSE227679
100505753	KRTAP16-1	keratin associated protein 16-1 [Source:HGNC Symbol;Acc:HGNC:18916]	0.310864		GSE227679
100505761	C10orf95-AS1	C10orf95 antisense RNA 1 [Source:HGNC Symbol;Acc:HGNC:45238]	-0.481779	0.312548	GSE227679
100505767	SPDYE18	speedy/RINGO cell cycle regulator family member E18 [Source:HGNC Symbol;Acc:HGNC:51514]	0.0960873	0.903369	GSE227679
100505768	LINC01364	long intergenic non-protein coding RNA 1364 [Source:HGNC Symbol;Acc:HGNC:50599]	-1.99117	0.369712	GSE227679
100505771	MHENCR	melanoma highly expressed competing endogenous lncRNA for miR-425 and miR-489 [Source:HGNC Symbol;Acc:HGNC:53110]	-0.383832	0.646943	GSE227679
100505776	LINC01541	long intergenic non-protein coding RNA 1541 [Source:HGNC Symbol;Acc:HGNC:51309]	-1.39409		GSE227679
100505783	OSER1-DT	OSER1 divergent transcript [Source:HGNC Symbol;Acc:HGNC:48585]	0.0847495	0.916646	GSE227679
100505795	PBX1-AS1	PBX1 antisense RNA 1 [Source:HGNC Symbol;Acc:HGNC:40425]	0.427011	0.516241	GSE227679
100505811	LINC02148	long intergenic non-protein coding RNA 2148 [Source:HGNC Symbol;Acc:HGNC:53008]			GSE227679
100505812	CARD8-AS1	CARD8 antisense RNA 1 [Source:HGNC Symbol;Acc:HGNC:51408]	-0.193232	0.542142	GSE227679
100505817	LINC02582	long intergenic non-protein coding RNA 2582 [Source:HGNC Symbol;Acc:HGNC:53792]	0.19884	0.952405	GSE227679
100505826	STK4-DT	STK4 divergent transcript [Source:HGNC Symbol;Acc:HGNC:43811]	-0.13871	0.956729	GSE227679
100505839	SH3PXD2A-AS1	SH3PXD2A antisense RNA 1 [Source:HGNC Symbol;Acc:HGNC:45242]	-0.00929382	0.99538	GSE227679
100505841	ZNF475	zinc finger protein 475 [Source:HGNC Symbol;Acc:HGNC:53564]	0.634747	0.75009	GSE227679
100505854	APTR	Alu-mediated CDKN1A/p21 transcriptional regulator [Source:HGNC Symbol;Acc:HGNC:44173]	0.112154	0.727606	GSE227679
100505869	CFAP58-DT	CFAP58 divergent transcript [Source:HGNC Symbol;Acc:HGNC:45243]	-0.173357	0.92365	GSE227679
100505876	CEBPZOS	CEBPZ opposite strand [Source:HGNC Symbol;Acc:HGNC:49288]	0.112512	0.65074	GSE227679
100505877	UBE2E2-DT	UBE2E2 divergent transcript [Source:HGNC Symbol;Acc:HGNC:44512]	-3.02044		GSE227679
100505878	LINC02059	long intergenic non-protein coding RNA 2059 [Source:HGNC Symbol;Acc:HGNC:52902]	-0.727556		GSE227679
100505879	KIF25-AS1	KIF25 antisense RNA 1 [Source:HGNC Symbol;Acc:HGNC:20953]	-2.98022		GSE227679
100505881	MAGI2-AS3	MAGI2 antisense RNA 3 [Source:HGNC Symbol;Acc:HGNC:40862]	-0.445064	0.31728	GSE227679
100505890	SORCS3-AS1	SORCS3 antisense RNA 1 [Source:HGNC Symbol;Acc:HGNC:45244]			GSE227679
100505894	TMEM161B-DT	TMEM161B divergent transcript [Source:HGNC Symbol;Acc:HGNC:43839]	-0.179726	0.693177	GSE227679
100505929	LINC01549	long intergenic non-protein coding RNA 1549 [Source:HGNC Symbol;Acc:HGNC:1277]	-3.23241		GSE227679
100505933	ADD3-AS1	ADD3 antisense RNA 1 [Source:HGNC Symbol;Acc:HGNC:48682]	-0.200661	0.830169	GSE227679
100505942	CTCF-DT	CTCF divergent transcript [Source:HGNC Symbol;Acc:HGNC:55409]	-0.144868	0.921987	GSE227679
100505964	LINC01304	long intergenic non-protein coding RNA 1304 [Source:HGNC Symbol;Acc:HGNC:50472]			GSE227679
100505967	LINC00645	long intergenic non-protein coding RNA 645 [Source:HGNC Symbol;Acc:HGNC:44299]	-0.532091		GSE227679
100505984	LINC02478	long intergenic non-protein coding RNA 2478 [Source:HGNC Symbol;Acc:HGNC:53446]	-0.830213	0.643486	GSE227679
100505989	SMIM31	small integral membrane protein 31 [Source:HGNC Symbol;Acc:HGNC:49638]	0.894121	0.638857	GSE227679
100505993	TMEM210	transmembrane protein 210 [Source:HGNC Symbol;Acc:HGNC:34059]	0.399733	0.89168	GSE227679
100506013	APELA	apelin receptor early endogenous ligand [Source:HGNC Symbol;Acc:HGNC:48925]	0.422886	0.847192	GSE227679
100506020	ARAP1-AS2	ARAP1 antisense RNA 2 [Source:HGNC Symbol;Acc:HGNC:39994]	-0.0865142	0.894169	GSE227679
100506022	LINC02606	long intergenic non-protein coding RNA 2606 [Source:HGNC Symbol;Acc:HGNC:54047]	0.24358	0.819309	GSE227679
100506025	CRPPA-AS1	CRPPA antisense RNA 1 [Source:HGNC Symbol;Acc:HGNC:48962]	-0.0215291	0.988938	GSE227679
100506033	PTOV1-AS1	PTOV1 antisense RNA 1 [Source:HGNC Symbol;Acc:HGNC:44174]	-0.040842	0.930951	GSE227679
100506035	LINC00989	long intergenic non-protein coding RNA 989 [Source:HGNC Symbol;Acc:HGNC:48918]	-0.830373	0.445681	GSE227679
100506049	LRRC72	leucine rich repeat containing 72 [Source:HGNC Symbol;Acc:HGNC:42972]	0.310864		GSE227679
100506050	LINC01005	long intergenic non-protein coding RNA 1005 [Source:HGNC Symbol;Acc:HGNC:48963]			GSE227679
100506054	RNASEH1-DT	RNASEH1 divergent transcript [Source:HGNC Symbol;Acc:HGNC:49289]	0.017455	0.982062	GSE227679
100506068	DACT3-AS1	DACT3 antisense RNA 1 [Source:HGNC Symbol;Acc:HGNC:44120]	0.0932104	0.970115	GSE227679
100506082	LINC02749	long intergenic non-protein coding RNA 2749 [Source:HGNC Symbol;Acc:HGNC:54268]	1.09306		GSE227679
100506083	DDX19A-DT	DDX19A divergent transcript [Source:HGNC Symbol;Acc:HGNC:55349]	-0.339417	0.381619	GSE227679
100506084	ARL17A	ADP ribosylation factor like GTPase 17A [Source:HGNC Symbol;Acc:HGNC:24096]	-0.174022	0.750624	GSE227679
100506084	ARL17B	ADP ribosylation factor like GTPase 17B [Source:HGNC Symbol;Acc:HGNC:32387]	-0.174022	0.750624	GSE227679
100506085	LINC02275	long intergenic non-protein coding RNA 2275 [Source:HGNC Symbol;Acc:HGNC:53191]	-0.606308		GSE227679
100506108	SIX3-AS1	SIX3 antisense RNA 1 [Source:HGNC Symbol;Acc:HGNC:40532]	0.274886		GSE227679
100506115	PELATON	plaque enriched lncRNA in atherosclerotic and inflammatory bowel macrophage regulation [Source:HGNC Symbol;Acc:HGNC:50328]	0.466809	0.760274	GSE227679
100506119	LINC01503	long intergenic non-protein coding RNA 1503 [Source:HGNC Symbol;Acc:HGNC:51184]	1.222	0.147858	GSE227679
100506122	LINC02431	long intergenic non-protein coding RNA 2431 [Source:HGNC Symbol;Acc:HGNC:53362]	0.632269		GSE227679
100506125	ADCY6-DT	ADCY6 divergent transcript [Source:HGNC Symbol;Acc:HGNC:53332]	0.301589	0.907044	GSE227679
100506126	LINC00867	long intergenic non-protein coding RNA 867 [Source:HGNC Symbol;Acc:HGNC:45265]	2.22054		GSE227679
100506127	GVQW3	GVQW motif containing 3 [Source:HGNC Symbol;Acc:HGNC:51239]	0.558137	0.323683	GSE227679
100506142	RHOQ-AS1	RHOQ antisense RNA 1 [Source:HGNC Symbol;Acc:HGNC:40816]	0.0978761	0.92394	GSE227679
100506144	TMEM35B	transmembrane protein 35B [Source:HGNC Symbol;Acc:HGNC:40021]	-0.118636	0.824372	GSE227679
100506164	HSFX1	heat shock transcription factor family, X-linked 1 [Source:HGNC Symbol;Acc:HGNC:29603]	-0.152394	0.857518	GSE227679
100506172	LOHAN2	lncRNA oncogene in head and neck cancer 2 [Source:HGNC Symbol;Acc:HGNC:51371]	-3.99193		GSE227679
100506175	RIPOR3-AS1	RIPOR3 antisense RNA 1 [Source:HGNC Symbol;Acc:HGNC:40760]	1.40705		GSE227679
100506178	STEAP1B-AS1	STEAP1B antisense RNA 1 [Source:HGNC Symbol;Acc:HGNC:56137]	-0.457665	0.741562	GSE227679
100506195	LARGE-AS1	LARGE antisense RNA 1 [Source:HGNC Symbol;Acc:HGNC:40336]	-0.0468552	0.963757	GSE227679
100506207	HULC	hepatocellular carcinoma up-regulated long non-coding RNA [Source:HGNC Symbol;Acc:HGNC:34232]	0.0970949	0.868201	GSE227679
100506211	MIR210HG	MIR210 host gene [Source:HGNC Symbol;Acc:HGNC:39524]	0.765875	0.424743	GSE227679
100506215	PAXBP1-AS1	PAXBP1 antisense RNA 1 [Source:HGNC Symbol;Acc:HGNC:39603]	0.0855044	0.817247	GSE227679
100506229	LINC01093	long intergenic non-protein coding RNA 1093 [Source:HGNC Symbol;Acc:HGNC:49218]	3.05009		GSE227679
100506237	NKX2-1-AS1	NKX2-1 antisense RNA 1 [Source:HGNC Symbol;Acc:HGNC:40585]			GSE227679
100506243	KRBOX1	KRAB box domain containing 1 [Source:HGNC Symbol;Acc:HGNC:38708]	-0.126076	0.932358	GSE227679
100506258	SYT9-AS1	SYT9 antisense RNA 1 [Source:HGNC Symbol;Acc:HGNC:56173]	0.223405	0.817645	GSE227679
100506275	KRBOX1-AS1	KRBOX1 antisense RNA 1 [Source:HGNC Symbol;Acc:HGNC:42942]	-0.995221	0.333834	GSE227679
100506286	TBC1D8-AS1	TBC1D8 antisense RNA 1 [Source:HGNC Symbol;Acc:HGNC:52782]	-0.0720078	0.952405	GSE227679
100506289	LINC03095	long intergenic non-protein coding RNA 3095 [Source:HGNC Symbol;Acc:HGNC:56738]	-2.13374	0.0538127	GSE227679
100506299	ID2-AS1	ID2 antisense RNA 1 [Source:HGNC Symbol;Acc:HGNC:51103]	-1.00148	0.152457	GSE227679
100506302	RBM33-DT	RBM33 divergent transcript [Source:HGNC Symbol;Acc:HGNC:56024]	0.0559779	0.944871	GSE227679
100506305	LINC00958	long intergenic non-protein coding RNA 958 [Source:HGNC Symbol;Acc:HGNC:48671]	-1.68228	0.172348	GSE227679
100506314	GPRC5D-AS1	GPRC5D and HEBP1 antisense RNA 1 [Source:HGNC Symbol;Acc:HGNC:53599]	0.0330557	0.977092	GSE227679
100506319	LINC01988	long intergenic non-protein coding RNA 1988 [Source:HGNC Symbol;Acc:HGNC:52820]	-1.66654	0.480359	GSE227679
100506334	LINC00649	long intergenic non-protein coding RNA 649 [Source:HGNC Symbol;Acc:HGNC:44305]	0.442184	0.663872	GSE227679
100506356	ARSD-AS1	ARSD antisense RNA 1 [Source:HGNC Symbol;Acc:HGNC:40085]	0.149936	0.806221	GSE227679
100506368	FZD4-DT	FZD4 divergent transcript [Source:HGNC Symbol;Acc:HGNC:54219]	-0.488616	0.666693	GSE227679
100506374	EDDM13	epididymal protein 13 [Source:HGNC Symbol;Acc:HGNC:53168]	-0.224038	0.697585	GSE227679
100506376	TTLL10-AS1	TTLL10 antisense RNA 1 [Source:HGNC Symbol;Acc:HGNC:41159]	-1.37878	0.424133	GSE227679
100506380	RNF32-DT	RNF32 divergent transcript [Source:HGNC Symbol;Acc:HGNC:48971]	-0.163676	0.719203	GSE227679
100506385	LINC01426	long intergenic non-protein coding RNA 1426 [Source:HGNC Symbol;Acc:HGNC:50734]	1.92	0.0363893	GSE227679
100506392	SLC16A1-AS1	SLC16A1 antisense RNA 1 [Source:HGNC Symbol;Acc:HGNC:49445]	-0.220582	0.808857	GSE227679
100506394	GAS6-DT	GAS6 divergent transcript [Source:HGNC Symbol;Acc:HGNC:43694]	0.24853	0.818438	GSE227679
100506403	RUNX1	RUNX family transcription factor 1 [Source:HGNC Symbol;Acc:HGNC:10471]	-0.121505	0.973034	GSE227679
100506406	CAPSL-DT	CAPSL divergent transcript [Source:HGNC Symbol;Acc:HGNC:56266]			GSE227679
100506409	ELOVL2-AS1	ELOVL2 antisense RNA 1 [Source:HGNC Symbol;Acc:HGNC:44156]	0.534235	0.845973	GSE227679
100506411	MAP3K9-DT	MAP3K9 divergent transcript [Source:HGNC Symbol;Acc:HGNC:53189]	1.15325	0.306023	GSE227679
100506412	LINC00871	long intergenic non-protein coding RNA 871 [Source:HGNC Symbol;Acc:HGNC:47038]	1.7307		GSE227679
100506413	DOCK4-AS1	DOCK4 antisense RNA 1 [Source:HGNC Symbol;Acc:HGNC:40876]	-0.0965982	0.892681	GSE227679
100506421	PANTR1	POU3F3 adjacent non-coding transcript 1 [Source:HGNC Symbol;Acc:HGNC:49513]	-0.96734	0.778066	GSE227679
100506422	LINC03106	long intergenic non-protein coding RNA 3106 [Source:HGNC Symbol;Acc:HGNC:56836]	-1.55884		GSE227679
100506428	CBR3-AS1	CBR3 antisense RNA 1 [Source:HGNC Symbol;Acc:HGNC:43664]	0.510163	0.223334	GSE227679
100506433	LINC00648	long intergenic non-protein coding RNA 648 [Source:HGNC Symbol;Acc:HGNC:44302]	-0.305614	0.918969	GSE227679
100506443	ITPKB-IT1	ITPKB intronic transcript 1 [Source:HGNC Symbol;Acc:HGNC:41349]	-0.816317	0.367355	GSE227679
100506457	MIR3681HG	MIR3681 host gene [Source:HGNC Symbol;Acc:HGNC:52001]	-1.72196		GSE227679
100506462	SRD5A3-AS1	SRD5A3 antisense RNA 1 [Source:HGNC Symbol;Acc:HGNC:44138]	-0.262524	0.876618	GSE227679
100506465	LINC01234	long intergenic non-protein coding RNA 1234 [Source:HGNC Symbol;Acc:HGNC:49757]	2.60649		GSE227679
100506469	TMEM147-AS1	TMEM147 antisense RNA 1 [Source:HGNC Symbol;Acc:HGNC:51273]	0.153659	0.669649	GSE227679
100506470	LINC01718	long intergenic non-protein coding RNA 1718 [Source:HGNC Symbol;Acc:HGNC:52505]			GSE227679
100506475	EGFLAM-AS2	EGFLAM antisense RNA 2 [Source:HGNC Symbol;Acc:HGNC:41168]	-3.2822	0.0368518	GSE227679
100506476	MIDEAS-AS1	MIDEAS antisense RNA 1 [Source:HGNC Symbol;Acc:HGNC:56194]	0.159563	0.889903	GSE227679
100506492	DSCAM-AS1	DSCAM antisense RNA 1 [Source:HGNC Symbol;Acc:HGNC:40197]	7.89407	1.0475e-06	GSE227679
100506495	LIFR-AS1	LIFR antisense RNA 1 [Source:HGNC Symbol;Acc:HGNC:43600]	-1.11287	0.0297693	GSE227679
100506497	CPVL-AS2	CPVL antisense RNA 2 [Source:HGNC Symbol;Acc:HGNC:56138]	-0.0281517	0.9825	GSE227679
100506498	LINC02274	long intergenic non-protein coding RNA 2274 [Source:HGNC Symbol;Acc:HGNC:53190]	-1.54017		GSE227679
100506504	PRKCZ-AS1	PRKCZ antisense RNA 1 [Source:HGNC Symbol;Acc:HGNC:40477]	0.143243	0.915056	GSE227679
100506506	MORC1-AS1	MORC1 antisense RNA 1 [Source:HGNC Symbol;Acc:HGNC:40377]			GSE227679
100506516	LINC01176	long intergenic non-protein coding RNA 1176 [Source:HGNC Symbol;Acc:HGNC:49548]	0.118557	0.904226	GSE227679
100506526	LINC03123	long intergenic non-protein coding RNA 3123 [Source:HGNC Symbol;Acc:HGNC:52969]	0.380506		GSE227679
100506527	LINC01007	long intergenic non-protein coding RNA 1007 [Source:HGNC Symbol;Acc:HGNC:48973]			GSE227679
100506530	LINC02349	long intergenic non-protein coding RNA 2349 [Source:HGNC Symbol;Acc:HGNC:53271]	-1.64371		GSE227679
100506540	MISFA	mitochondrial sheath formation associated [Source:HGNC Symbol;Acc:HGNC:44122]	0.24737	0.40446	GSE227679
100506542	LINC01082	long intergenic non-protein coding RNA 1082 [Source:HGNC Symbol;Acc:HGNC:49125]	0.871808		GSE227679
100506564	SPMAP2L	sperm microtubule associated protein 2 like [Source:HGNC Symbol;Acc:HGNC:43771]	-0.294772		GSE227679
100506571	LINC02809	long intergenic non-protein coding RNA 2809 [Source:HGNC Symbol;Acc:HGNC:54341]	-0.525793	0.526271	GSE227679
100506581	C16orf95	chromosome 16 open reading frame 95 [Source:HGNC Symbol;Acc:HGNC:40033]	-0.392831	0.679166	GSE227679
100506599	PPP1R26-AS1	PPP1R26 antisense RNA 1 [Source:HGNC Symbol;Acc:HGNC:48717]	0.513382	0.441374	GSE227679
100506622	LINC00540	long intergenic non-protein coding RNA 540 [Source:HGNC Symbol;Acc:HGNC:43673]	-0.608876		GSE227679
100506637	PRKAR2A-AS1	PRKAR2A antisense RNA 1 [Source:HGNC Symbol;Acc:HGNC:40471]	0.0627299	0.965272	GSE227679
100506650	LINC02089	long intergenic non-protein coding RNA 2089 [Source:HGNC Symbol;Acc:HGNC:52940]			GSE227679
100506655	LCMT1-AS2	LCMT1 antisense RNA 2 [Source:HGNC Symbol;Acc:HGNC:51178]	0.195032	0.828808	GSE227679
100506658	OCLN	occludin [Source:HGNC Symbol;Acc:HGNC:8104]	0.0554914	0.949229	GSE227679
100506660	DDX11-AS1	DDX11 antisense RNA 1 [Source:HGNC Symbol;Acc:HGNC:44176]	-0.533763	0.588367	GSE227679
100506668	NRAV	negative regulator of antiviral response [Source:HGNC Symbol;Acc:HGNC:48588]	0.749612	0.139999	GSE227679
100506674	MRPS30-DT	MRPS30 divergent transcript [Source:HGNC Symbol;Acc:HGNC:53420]	2.71985	0.0106345	GSE227679
100506675	LINC03031	long intergenic non-protein coding RNA 3031 [Source:HGNC Symbol;Acc:HGNC:56174]			GSE227679
100506679	TTLL1-AS1	TTLL1 antisense RNA 1 [Source:HGNC Symbol;Acc:HGNC:40111]	-0.0851818	0.927496	GSE227679
100506680	SACS-AS1	SACS antisense RNA 1 [Source:HGNC Symbol;Acc:HGNC:39835]	-3.30831	0.0870236	GSE227679
100506682	LINC03012	long intergenic non-protein coding RNA 3012 [Source:HGNC Symbol;Acc:HGNC:56139]	-1.86613		GSE227679
100506686	IQCH-AS1	IQCH antisense RNA 1 [Source:HGNC Symbol;Acc:HGNC:44104]	-0.185629	0.661456	GSE227679
100506688	LINC02982	long intergenic non-protein coding RNA 2982 [Source:HGNC Symbol;Acc:HGNC:56056]	0.266197	0.878823	GSE227679
100506696	PCAT6	prostate cancer associated transcript 6 [Source:HGNC Symbol;Acc:HGNC:43714]	0.37627	0.785691	GSE227679
100506697	LINC00327	long intergenic non-protein coding RNA 327 [Source:HGNC Symbol;Acc:HGNC:42009]	-1.17826	0.629715	GSE227679
100506710	EBLN3P	endogenous Bornavirus like nucleoprotein 3, pseudogene [Source:HGNC Symbol;Acc:HGNC:50682]	0.241635	0.30286	GSE227679
100506713	MIR497HG	mir-497-195 cluster host gene [Source:HGNC Symbol;Acc:HGNC:39523]	0.32859	0.66714	GSE227679
100506724	LINC00901	long intergenic non-protein coding RNA 901 [Source:HGNC Symbol;Acc:HGNC:40352]	0		GSE227679
100506731	FLRT2-AS1	FLRT2 antisense RNA 1 [Source:HGNC Symbol;Acc:HGNC:55912]	-0.450187	0.700965	GSE227679
100506733	FAM170B-AS1	FAM170B antisense RNA 1 [Source:HGNC Symbol;Acc:HGNC:45006]	-4.4738	0.022065	GSE227679
100506736	SLFN12L	schlafen family member 12 like [Source:HGNC Symbol;Acc:HGNC:33920]	-0.441847	0.418461	GSE227679
100506737	LINC01589	long intergenic non-protein coding RNA 1589 [Source:HGNC Symbol;Acc:HGNC:51520]	-0.859141	0.340885	GSE227679
100506742	CASP12	caspase 12 (gene/pseudogene) [Source:HGNC Symbol;Acc:HGNC:19004]	-1.09436	0.261106	GSE227679
100506749	AGAP1-IT1	AGAP1 intronic transcript 1 [Source:HGNC Symbol;Acc:HGNC:41427]	-0.325158	0.735434	GSE227679
100506757	LINC00629	long intergenic non-protein coding RNA 629 [Source:HGNC Symbol;Acc:HGNC:44262]	0.592357		GSE227679
100506765	IGSF11-AS1	IGSF11 antisense RNA 1 [Source:HGNC Symbol;Acc:HGNC:40777]	1.92682		GSE227679
100506775	LINC01353	long intergenic non-protein coding RNA 1353 [Source:HGNC Symbol;Acc:HGNC:50580]	0.572145	0.867512	GSE227679
100506776	TRG-AS1	T cell receptor gamma locus antisense RNA 1 [Source:HGNC Symbol;Acc:HGNC:48974]	-0.040535	0.973873	GSE227679
100506779	TSPOAP1-AS1	TSPOAP1, SUPT4H1 and RNF43 antisense RNA 1 [Source:HGNC Symbol;Acc:HGNC:44148]	0.336352	0.28227	GSE227679
100506791	LINC01511	long intergenic non-protein coding RNA 1511 [Source:HGNC Symbol;Acc:HGNC:51200]	3.36478		GSE227679
100506795	LINC01354	long intergenic non-protein coding RNA 1354 [Source:HGNC Symbol;Acc:HGNC:50581]	-0.468176	0.726604	GSE227679
100506801	ECE1-AS1	ECE1 antisense RNA 1 [Source:HGNC Symbol;Acc:HGNC:40203]	-0.776722	0.125711	GSE227679
100506810	LINC01132	long intergenic non-protein coding RNA 1132 [Source:HGNC Symbol;Acc:HGNC:49444]	0.610703	0.575075	GSE227679
100506827	LINC02475	long intergenic non-protein coding RNA 2475 [Source:HGNC Symbol;Acc:HGNC:53418]	-1.24008		GSE227679
100506834	GAS1RR	GAS1 adjacent regulatory RNA [Source:HGNC Symbol;Acc:HGNC:52261]	-1.00689	0.0936461	GSE227679
100506835	LINC00840	long intergenic non-protein coding RNA 840 [Source:HGNC Symbol;Acc:HGNC:44987]	-0.605991	0.648638	GSE227679
100506866	TTN-AS1	TTN antisense RNA 1 [Source:HGNC Symbol;Acc:HGNC:44124]	-0.309849	0.323928	GSE227679
100506881	MKLN1-AS	MKLN1 antisense RNA [Source:HGNC Symbol;Acc:HGNC:40374]	0.0115963	0.990469	GSE227679
100506885	LNC-LBCS	lncRNA bladder and prostate cancer suppressor, hnRNPK interacting [Source:HGNC Symbol;Acc:HGNC:54418]	-1.15199	0.610023	GSE227679
100506895	LUARIS	lncRNA upregulator of antiviral response interferon signaling [Source:HGNC Symbol;Acc:HGNC:40992]	-0.385495	0.830437	GSE227679
100506897	DAPK1-IT1	DAPK1 intronic transcript 1 [Source:HGNC Symbol;Acc:HGNC:43591]	0.512658	0.809334	GSE227679
100506907	CFAP100-DT	CFAP100 divergent transcript [Source:HGNC Symbol;Acc:HGNC:49641]			GSE227679
100506915	CHRM3-AS2	CHRM3 antisense RNA 2 [Source:HGNC Symbol;Acc:HGNC:43725]	-1.55242	0.360747	GSE227679
100506922	MAP3K2-DT	MAP3K2 divergent transcript [Source:HGNC Symbol;Acc:HGNC:54088]	0.804772	0.029598	GSE227679
100506930	LINC00665	long intergenic non-protein coding RNA 665 [Source:HGNC Symbol;Acc:HGNC:44323]	-0.0596458	0.908499	GSE227679
100506963	ELOA-AS1	ELOA antisense RNA 1 [Source:HGNC Symbol;Acc:HGNC:50582]	-0.0782129	0.830252	GSE227679
100506994	PTPRG-AS1	PTPRG antisense RNA 1 [Source:HGNC Symbol;Acc:HGNC:44638]	-0.195199	0.638614	GSE227679
100506999	LINC02318	long intergenic non-protein coding RNA 2318 [Source:HGNC Symbol;Acc:HGNC:53237]	1.1472		GSE227679
100507003	GFY	golgi associated olfactory signaling regulator [Source:HGNC Symbol;Acc:HGNC:44663]	0		GSE227679
100507027	MRLN	myoregulin [Source:HGNC Symbol;Acc:HGNC:48649]	0.961168		GSE227679
100507032	TMCC1-DT	TMCC1 divergent transcript [Source:HGNC Symbol;Acc:HGNC:49060]	-0.117126	0.87939	GSE227679
100507034	PITRM1-AS1	PITRM1 antisense RNA 1 [Source:HGNC Symbol;Acc:HGNC:44675]	0.0210456	0.955868	GSE227679
100507043	TUNAR	TCL1 upstream neural differentiation-associated RNA [Source:HGNC Symbol;Acc:HGNC:44088]	-1.00911		GSE227679
100507050	TPBGL	trophoblast glycoprotein like [Source:HGNC Symbol;Acc:HGNC:44159]	0.880621		GSE227679
100507055	LRCOL1	leucine rich colipase like 1 [Source:HGNC Symbol;Acc:HGNC:44160]	-1.29484	0.498605	GSE227679
100507057	MELTF-AS1	MELTF antisense RNA 1 [Source:HGNC Symbol;Acc:HGNC:40373]	0.00894587	0.994495	GSE227679
100507058	LINC00845	long intergenic non-protein coding RNA 845 [Source:HGNC Symbol;Acc:HGNC:45033]	0.85187		GSE227679
100507059	LINC00703	long intergenic non-protein coding RNA 703 [Source:HGNC Symbol;Acc:HGNC:44677]			GSE227679
100507062	PSMD6-AS2	PSMD6 antisense RNA 2 [Source:HGNC Symbol;Acc:HGNC:44125]	-0.136623	0.828879	GSE227679
100507064	TEX26-AS1	TEX26 antisense RNA 1 [Source:HGNC Symbol;Acc:HGNC:42784]	-2.42524		GSE227679
100507086	DLG1-AS1	DLG1 antisense RNA 1 [Source:HGNC Symbol;Acc:HGNC:44154]	0.187298	0.811586	GSE227679
100507091	PITPNM2-AS1	PITPNM2 antisense RNA 1 [Source:HGNC Symbol;Acc:HGNC:53391]	-1.36822	0.236859	GSE227679
100507096	GIMD1	GIMAP family P-loop NTPase domain containing 1 [Source:HGNC Symbol;Acc:HGNC:44141]			GSE227679
100507114	LINC00445	long intergenic non-protein coding RNA 445 [Source:HGNC Symbol;Acc:HGNC:42782]	-1.52742	0.579379	GSE227679
100507117	ASAP1-IT2	ASAP1 intronic transcript 2 [Source:HGNC Symbol;Acc:HGNC:48917]	-0.128132	0.918379	GSE227679
100507118	PRC1-AS1	PRC1 antisense RNA 1 [Source:HGNC Symbol;Acc:HGNC:48587]	1.55347	0.00545279	GSE227679
100507127	LINP1	lncRNA in non-homologous end joining pathway 1 [Source:HGNC Symbol;Acc:HGNC:53170]	-1.2467		GSE227679
100507143	LINC00708	long intergenic non-protein coding RNA 708 [Source:HGNC Symbol;Acc:HGNC:44694]	0.671535		GSE227679
100507144	CD44-DT	CD44 divergent transcript [Source:HGNC Symbol;Acc:HGNC:56175]	1.81813		GSE227679
100507156	LOXL2-AS1	LOXL2 antisense RNA 1 [Source:HGNC Symbol;Acc:HGNC:56648]	0.438127	0.488772	GSE227679
100507170	CT47A8	cancer/testis antigen family 47 member A8 [Source:HGNC Symbol;Acc:HGNC:33289]			GSE227679
100507170	CT47A9	cancer/testis antigen family 47 member A9 [Source:HGNC Symbol;Acc:HGNC:33290]			GSE227679
100507170	CT47A2	cancer/testis antigen family 47 member A2 [Source:HGNC Symbol;Acc:HGNC:33283]			GSE227679
100507170	CT47A12	cancer/testis antigen family 47 member A12 [Source:HGNC Symbol;Acc:HGNC:33292]			GSE227679
100507170	CT47A4	cancer/testis antigen family 47 member A4 [Source:HGNC Symbol;Acc:HGNC:33285]			GSE227679
100507170	CT47A10	cancer/testis antigen family 47 member A10 [Source:HGNC Symbol;Acc:HGNC:33291]			GSE227679
100507170	CT47A6	cancer/testis antigen family 47 member A6 [Source:HGNC Symbol;Acc:HGNC:33287]			GSE227679
100507170	CT47A5	cancer/testis antigen family 47 member A5 [Source:HGNC Symbol;Acc:HGNC:33286]			GSE227679
100507170	CT47A3	cancer/testis antigen family 47 member A3 [Source:HGNC Symbol;Acc:HGNC:33284]			GSE227679
100507171	BOLA3-DT	BOLA3 divergent transcript [Source:HGNC Symbol;Acc:HGNC:42922]	-0.418484	0.409469	GSE227679
100507173	LINC01012	long intergenic non-protein coding RNA 1012 [Source:HGNC Symbol;Acc:HGNC:48986]	0.40097	0.826568	GSE227679
100507175	LINC02408	long intergenic non-protein coding RNA 2408 [Source:HGNC Symbol;Acc:HGNC:53337]	0.617137	0.854265	GSE227679
100507178	SLFNL1-AS1	SLFNL1 antisense RNA 1 [Source:HGNC Symbol;Acc:HGNC:44126]	-0.3032	0.480526	GSE227679
100507203	SMLR1	small leucine rich protein 1 [Source:HGNC Symbol;Acc:HGNC:44670]	-0.454212	0.775728	GSE227679
100507206	LINC00943	long intergenic non-protein coding RNA 943 [Source:HGNC Symbol;Acc:HGNC:48639]	0.615572	0.788818	GSE227679
100507240	VWA8-AS1	VWA8 antisense RNA 1 (head to head) [Source:HGNC Symbol;Acc:HGNC:44270]	-0.152366		GSE227679
100507246	SNHG16	small nucleolar RNA host gene 16 [Source:HGNC Symbol;Acc:HGNC:44352]	-0.12194	0.778043	GSE227679
100507254	LINC01013	long intergenic non-protein coding RNA 1013 [Source:HGNC Symbol;Acc:HGNC:48987]	-0.268726	0.891948	GSE227679
100507257	MEG9	maternally expressed 9 [Source:HGNC Symbol;Acc:HGNC:43874]	-1.34804	0.171397	GSE227679
100507261	MIR670HG	MIR670 host gene [Source:HGNC Symbol;Acc:HGNC:49204]			GSE227679
100507266	STX18-AS1	STX18 antisense RNA 1 (head to head) [Source:HGNC Symbol;Acc:HGNC:48877]	0.045134	0.946993	GSE227679
100507274	LINC01210	long intergenic non-protein coding RNA 1210 [Source:HGNC Symbol;Acc:HGNC:49642]			GSE227679
100507277	LINC02314	long intergenic non-protein coding RNA 2314 [Source:HGNC Symbol;Acc:HGNC:53233]	1.56315		GSE227679
100507283	MSANTD2-AS1	MSANTD2 antisense RNA 1 [Source:HGNC Symbol;Acc:HGNC:55601]	-0.336173	0.716567	GSE227679
100507290	ZNF865	zinc finger protein 865 [Source:HGNC Symbol;Acc:HGNC:38705]	-0.421004	0.544146	GSE227679
100507291	COPB2-DT	COPB2 divergent transcript [Source:HGNC Symbol;Acc:HGNC:55579]	-0.0590221	0.933592	GSE227679
100507300	ALKBH3-AS1	ALKBH3 antisense RNA 1 [Source:HGNC Symbol;Acc:HGNC:48670]	-0.509954	0.661456	GSE227679
100507308	TARID	TCF21 antisense RNA inducing promoter demethylation [Source:HGNC Symbol;Acc:HGNC:50506]	-1.21427	0.536972	GSE227679
100507316	MINCR	MYC-induced long non-coding RNA [Source:HGNC Symbol;Acc:HGNC:51653]	0.22926	0.728098	GSE227679
100507331	ZSWIM8-AS1	ZSWIM8 antisense RNA 1 [Source:HGNC Symbol;Acc:HGNC:45103]	0.280378	0.449548	GSE227679
100507341	SMIM18	small integral membrane protein 18 [Source:HGNC Symbol;Acc:HGNC:42973]	0.430942	0.721893	GSE227679
100507347	VIM-AS1	VIM antisense RNA 1 [Source:HGNC Symbol;Acc:HGNC:44879]	-0.206845	0.775548	GSE227679
100507362	LINC01015	long intergenic non-protein coding RNA 1015 [Source:HGNC Symbol;Acc:HGNC:48988]			GSE227679
100507373	ADGRL1-AS1	ADGRL1 antisense RNA 1 [Source:HGNC Symbol;Acc:HGNC:55309]	0.0392772	0.943439	GSE227679
100507377	LINC02882	long intergenic non-protein coding RNA 2882 [Source:HGNC Symbol;Acc:HGNC:54802]	0.671535		GSE227679
100507388	PARM1-AS1	PARM1 antisense RNA 1 [Source:HGNC Symbol;Acc:HGNC:41051]	-0.0292596	0.986896	GSE227679
100507389	HLMR1	hepatic lncRNA metabolic regulator 1 [Source:HGNC Symbol;Acc:HGNC:56713]			GSE227679
100507391	LINC01968	long intergenic non-protein coding RNA 1968 [Source:HGNC Symbol;Acc:HGNC:52794]	1.66696		GSE227679
100507392	SENCR	smooth muscle and endothelial cell enriched migration/differentiation-associated lncRNA [Source:HGNC Symbol;Acc:HGNC:44177]	-0.15894	0.916392	GSE227679
100507401	LRP4-AS1	LRP4 antisense RNA 1 [Source:HGNC Symbol;Acc:HGNC:44128]	-1.29098	0.025075	GSE227679
100507404	TMLHE-AS1	TMLHE antisense RNA 1 [Source:HGNC Symbol;Acc:HGNC:44261]	0.0416357	0.956642	GSE227679
100507406	LINC02539	long intergenic non-protein coding RNA 2539 [Source:HGNC Symbol;Acc:HGNC:53572]	-0.230138		GSE227679
100507420	LINC01605	long intergenic non-protein coding RNA 1605 [Source:HGNC Symbol;Acc:HGNC:51654]	1.81942	0.0333663	GSE227679
100507421	TMEM178B	transmembrane protein 178B [Source:HGNC Symbol;Acc:HGNC:44112]	-1.35036	0.00834917	GSE227679
100507423	MKNK1-AS1	MKNK1 antisense RNA 1 [Source:HGNC Symbol;Acc:HGNC:44129]	-0.130835	0.807566	GSE227679
100507428	LINC00458	long intergenic non-protein coding RNA 458 [Source:HGNC Symbol;Acc:HGNC:42807]	-1.51102		GSE227679
100507433	ZNF571-AS1	ZNF571 antisense RNA 1 [Source:HGNC Symbol;Acc:HGNC:44324]	0.121582	0.832334	GSE227679
100507435	DLGAP2-AS1	DLGAP2 antisense RNA 1 [Source:HGNC Symbol;Acc:HGNC:50467]	-1.18603		GSE227679
100507436	MICA	MHC class I polypeptide-related sequence A [Source:HGNC Symbol;Acc:HGNC:7090]	-0.14084	0.720948	GSE227679
100507437	MTA1-DT	MTA1 divergent transcript [Source:HGNC Symbol;Acc:HGNC:56032]	0.18222	0.905802	GSE227679
100507458	ZNF213-AS1	ZNF213 antisense RNA 1 (head to head) [Source:HGNC Symbol;Acc:HGNC:50505]	0.46146	0.356518	GSE227679
100507459	NRSN2-AS1	NRSN2 antisense RNA 1 [Source:HGNC Symbol;Acc:HGNC:51222]	0.120364	0.880955	GSE227679
100507461	LINC02032	long intergenic non-protein coding RNA 2032 [Source:HGNC Symbol;Acc:HGNC:52866]	0.130529		GSE227679
100507462	CCDC28A-AS1	CCDC28A antisense RNA 1 [Source:HGNC Symbol;Acc:HGNC:51715]	-0.554844	0.608367	GSE227679
100507463	PSMB8-AS1	PSMB8 antisense RNA 1 (head to head) [Source:HGNC Symbol;Acc:HGNC:39758]	0.17764	0.666693	GSE227679
100507470	GRID1-AS1	GRID1 antisense RNA 1 [Source:HGNC Symbol;Acc:HGNC:44131]	-2.4464		GSE227679
100507477	LINC02941	long intergenic non-protein coding RNA 2941 [Source:HGNC Symbol;Acc:HGNC:55956]	-2.88895		GSE227679
100507480	LINC02853	long intergenic non-protein coding RNA 2853 [Source:HGNC Symbol;Acc:HGNC:54390]			GSE227679
100507487	LINC02615	long intergenic non-protein coding RNA 2615 [Source:HGNC Symbol;Acc:HGNC:53402]	0.269104	0.759187	GSE227679
100507495	SDCBP2-AS1	SDCBP2 antisense RNA 1 [Source:HGNC Symbol;Acc:HGNC:44314]	-0.0199998	0.982111	GSE227679
100507500	EGFR-AS1	EGFR antisense RNA 1 [Source:HGNC Symbol;Acc:HGNC:40207]	-1.07888	0.0655897	GSE227679
100507506	ECI2-DT	ECI2 divergent transcript [Source:HGNC Symbol;Acc:HGNC:54425]	-1.00269	0.405074	GSE227679
100507507	FAM131B-AS2	FAM131B antisense RNA 2 [Source:HGNC Symbol;Acc:HGNC:56141]	-0.0864364	0.858076	GSE227679
100507516	LINC02984	long intergenic non-protein coding RNA 2984 [Source:HGNC Symbol;Acc:HGNC:56063]	-0.374093	0.48073	GSE227679
100507524	ARHGEF26-AS1	ARHGEF26 antisense RNA 1 [Source:HGNC Symbol;Acc:HGNC:41048]	-0.353733	0.791593	GSE227679
100507527	LINC03103	long intergenic non-protein coding RNA 3103 [Source:HGNC Symbol;Acc:HGNC:48330]	1.95478		GSE227679
100507528	LINC00613	long intergenic non-protein coding RNA 613 [Source:HGNC Symbol;Acc:HGNC:44060]	0		GSE227679
100507533	SOX21-AS1	SOX21 antisense divergent transcript 1 [Source:HGNC Symbol;Acc:HGNC:39807]	-1.65319		GSE227679
100507534	LINC02192	long intergenic non-protein coding RNA 2192 [Source:HGNC Symbol;Acc:HGNC:53054]	-0.951479		GSE227679
100507537	STRIT1	small transmembrane regulator of ion transport 1 [Source:HGNC Symbol;Acc:HGNC:52297]	-0.909774		GSE227679
100507540	LINC01504	long intergenic non-protein coding RNA 1504 [Source:HGNC Symbol;Acc:HGNC:51185]	-0.562476	0.51409	GSE227679
100507547	PRRT1	proline rich transmembrane protein 1 [Source:HGNC Symbol;Acc:HGNC:13943]	-0.457228	0.25101	GSE227679
100507551	PGLS-DT	PGLS divergent transcript [Source:HGNC Symbol;Acc:HGNC:55274]	-0.491677	0.161915	GSE227679
100507554	RPL37A-DT	RPL37A divergent transcript [Source:HGNC Symbol;Acc:HGNC:40510]	-0.0909302	0.938541	GSE227679
100507567	RAB11B-AS1	RAB11B antisense RNA 1 [Source:HGNC Symbol;Acc:HGNC:44178]	-0.479325	0.0250083	GSE227679
100507582	BHLHE40-AS1	BHLHE40 antisense RNA 1 [Source:HGNC Symbol;Acc:HGNC:44471]	0.220666	0.610523	GSE227679
100507584	LINC01016	long intergenic non-protein coding RNA 1016 [Source:HGNC Symbol;Acc:HGNC:48991]	1.58656	0.423327	GSE227679
100507588	TGFBR3L	transforming growth factor beta receptor 3 like [Source:HGNC Symbol;Acc:HGNC:44152]	0.660974	0.66687	GSE227679
100507599	TFIP11-DT	TFIP11 divergent transcript [Source:HGNC Symbol;Acc:HGNC:55374]	-0.28675	0.688003	GSE227679
100507600	LCT-AS1	LCT antisense RNA 1 [Source:HGNC Symbol;Acc:HGNC:40337]	4.46058		GSE227679
100507602	TRIM52-AS1	TRIM52 antisense RNA 1 (head to head) [Source:HGNC Symbol;Acc:HGNC:49006]	-0.182606	0.690633	GSE227679
100507605	LINC00837	long intergenic non-protein coding RNA 837 [Source:HGNC Symbol;Acc:HGNC:27436]			GSE227679
100507607	NPIPB9	nuclear pore complex interacting protein family member B9 [Source:HGNC Symbol;Acc:HGNC:41987]	0.145694	0.782711	GSE227679
100507608	KRTAP9-6	keratin associated protein 9-6 [Source:HGNC Symbol;Acc:HGNC:18914]			GSE227679
100507612	LINC00402	long intergenic non-protein coding RNA 402 [Source:HGNC Symbol;Acc:HGNC:42732]	1.03949	0.702646	GSE227679
100507629	LINC00658	long intergenic non-protein coding RNA 658 [Source:HGNC Symbol;Acc:HGNC:44315]	1.98281		GSE227679
100507632	LINC00968	long intergenic non-protein coding RNA 968 [Source:HGNC Symbol;Acc:HGNC:48727]	-0.485204	0.792503	GSE227679
100507639	LINC02432	long intergenic non-protein coding RNA 2432 [Source:HGNC Symbol;Acc:HGNC:53363]	-0.0596848	0.983254	GSE227679
100507642	LINC03014	long intergenic non-protein coding RNA 3014 [Source:HGNC Symbol;Acc:HGNC:56142]	-0.160197	0.896274	GSE227679
100507650	RNF212B	ring finger protein 212B [Source:HGNC Symbol;Acc:HGNC:20438]	0.285963	0.661277	GSE227679
100507657	LINC02554	long intergenic non-protein coding RNA 2554 [Source:HGNC Symbol;Acc:HGNC:53594]	0.310864		GSE227679
100507661	LINC02082	long intergenic non-protein coding RNA 2082 [Source:HGNC Symbol;Acc:HGNC:52931]	-0.24164	0.934916	GSE227679
100507679	MUC22	mucin 22 [Source:HGNC Symbol;Acc:HGNC:39755]	-1.79414		GSE227679
100507747	C13orf46	chromosome 13 open reading frame 46 [Source:HGNC Symbol;Acc:HGNC:53786]	-0.741455	0.254754	GSE227679
100508631	LINC02616	long intergenic non-protein coding RNA 2616 [Source:HGNC Symbol;Acc:HGNC:54078]	0.4912		GSE227679
100509620	AQP7B	aquaporin 7B [Source:HGNC Symbol;Acc:HGNC:53895]	-1.5565	0.262532	GSE227679
100509894	CPB2-AS1	CPB2 antisense RNA 1 [Source:HGNC Symbol;Acc:HGNC:39898]	-1.32845	0.377312	GSE227679
10051	SMC4	structural maintenance of chromosomes 4 [Source:HGNC Symbol;Acc:HGNC:14013]	0.909936	0.000249307	GSE227679
10052	GJC1	gap junction protein gamma 1 [Source:HGNC Symbol;Acc:HGNC:4280]	0.290939	0.62803	GSE227679
100526664	LY75-CD302	LY75-CD302 readthrough [Source:HGNC Symbol;Acc:HGNC:38828]	-0.492376	0.125956	GSE227679
100526693	ARPC4-TTLL3	ARPC4-TTLL3 readthrough [Source:HGNC Symbol;Acc:HGNC:38830]	0.0341153	0.927431	GSE227679
100526694	MSANTD3-TMEFF1	MSANTD3-TMEFF1 readthrough [Source:HGNC Symbol;Acc:HGNC:38838]	0.281472	0.548772	GSE227679
100526737	RBM14-RBM4	RBM14-RBM4 readthrough [Source:HGNC Symbol;Acc:HGNC:38840]	0.230424	0.350229	GSE227679
100526739	CENPS-CORT	CENPS-CORT readthrough [Source:HGNC Symbol;Acc:HGNC:38843]	0.412506	0.402154	GSE227679
100526740	ATP5MF-PTCD1	ATP5MF-PTCD1 readthrough [Source:HGNC Symbol;Acc:HGNC:38844]	0.321012	0.433291	GSE227679
100526760	ABHD14A-ACY1	ABHD14A-ACY1 readthrough [Source:HGNC Symbol;Acc:HGNC:38856]	-0.0423908	0.933592	GSE227679
100526761	CCDC169-SOHLH2	CCDC169-SOHLH2 readthrough [Source:HGNC Symbol;Acc:HGNC:38866]	-0.510719	0.593561	GSE227679
100526767	RNF103-CHMP3	RNF103-CHMP3 readthrough [Source:HGNC Symbol;Acc:HGNC:38847]	-0.0143734	0.958719	GSE227679
100526771	SMIM35	small integral membrane protein 35 [Source:HGNC Symbol;Acc:HGNC:44179]	0.340901	0.610064	GSE227679
100526772	STIMATE-MUSTN1	STIMATE-MUSTN1 readthrough [Source:HGNC Symbol;Acc:HGNC:38834]	-0.588692	0.111054	GSE227679
100526773	EPPIN-WFDC6	EPPIN-WFDC6 readthrough [Source:HGNC Symbol;Acc:HGNC:38825]	0.691891		GSE227679
100526783	ARPIN-AP3S2	ARPIN-AP3S2 readthrough [Source:HGNC Symbol;Acc:HGNC:38824]	0.146263	0.431333	GSE227679
100526794	NT5C1B-RDH14	NT5C1B-RDH14 readthrough [Source:HGNC Symbol;Acc:HGNC:38831]	0.0514022	0.928407	GSE227679
100526830	SLX1A-SULT1A3	SLX1A-SULT1A3 readthrough (NMD candidate) [Source:HGNC Symbol;Acc:HGNC:44437]	0.139491	0.769785	GSE227679
100526831	SLX1B-SULT1A4	SLX1B-SULT1A4 readthrough (NMD candidate) [Source:HGNC Symbol;Acc:HGNC:48353]	0.160358	0.725302	GSE227679
100526832	KLHL23	kelch like family member 23 [Source:HGNC Symbol;Acc:HGNC:27506]	-0.0886145	0.863795	GSE227679
100526835	FPGT-TNNI3K	FPGT-TNNI3K readthrough [Source:HGNC Symbol;Acc:HGNC:42952]	-0.00625595	0.990621	GSE227679
100526842	RPL17-C18orf32	RPL17-C18orf32 readthrough [Source:HGNC Symbol;Acc:HGNC:44661]	-0.400504	0.39419	GSE227679
100527943	TGIF2-RAB5IF	TGIF2-RAB5IF readthrough [Source:HGNC Symbol;Acc:HGNC:44664]	0.615158	0.09056	GSE227679
100527949	GIMAP1-GIMAP5	GIMAP1-GIMAP5 readthrough [Source:HGNC Symbol;Acc:HGNC:51257]	-0.486283	0.359389	GSE227679
100527963	PMF1-BGLAP	PMF1-BGLAP readthrough [Source:HGNC Symbol;Acc:HGNC:42953]	0.135493	0.564391	GSE227679
100527964	ACBD6	acyl-CoA binding domain containing 6 [Source:HGNC Symbol;Acc:HGNC:23339]	0.314792	0.538378	GSE227679
100527978	TLCD4-RWDD3	TLCD4-RWDD3 readthrough [Source:HGNC Symbol;Acc:HGNC:49388]	0.0526251	0.930951	GSE227679
100528017	SAA2-SAA4	SAA2-SAA4 readthrough [Source:HGNC Symbol;Acc:HGNC:39550]	-0.764441	0.505001	GSE227679
100528020	FAM187A	family with sequence similarity 187 member A [Source:HGNC Symbol;Acc:HGNC:35153]	0.732296	0.365746	GSE227679
100528021	ST20-MTHFS	ST20-MTHFS readthrough [Source:HGNC Symbol;Acc:HGNC:44655]	0.195358	0.569482	GSE227679
100528030	POC1B-GALNT4	POC1B-GALNT4 readthrough [Source:HGNC Symbol;Acc:HGNC:42957]	0.143838	0.747352	GSE227679
100528032	KLRK1	killer cell lectin like receptor K1 [Source:HGNC Symbol;Acc:HGNC:18788]	-0.651103	0.284519	GSE227679
100528062	GPRASP2	G protein-coupled receptor associated sorting protein 2 [Source:HGNC Symbol;Acc:HGNC:25169]	-0.263012	0.170755	GSE227679
100528062	ARMCX5-GPRASP2	ARMCX5-GPRASP2 readthrough [Source:HGNC Symbol;Acc:HGNC:42000]	-0.263012	0.170755	GSE227679
100528064	NEDD8-MDP1	NEDD8-MDP1 readthrough [Source:HGNC Symbol;Acc:HGNC:39551]	0.145448	0.732254	GSE227679
100529063	BCL2L2-PABPN1	BCL2L2-PABPN1 readthrough [Source:HGNC Symbol;Acc:HGNC:42959]	-0.123314	0.459848	GSE227679
100529097	RPL36A-HNRNPH2	RPL36A-HNRNPH2 readthrough [Source:HGNC Symbol;Acc:HGNC:48349]	-0.230167	0.640357	GSE227679
100529144	CORO7-PAM16	CORO7-PAM16 readthrough [Source:HGNC Symbol;Acc:HGNC:44424]	0.158859	0.733694	GSE227679
100529145	TEN1-CDK3	TEN1-CDK3 readthrough (NMD candidate) [Source:HGNC Symbol;Acc:HGNC:44420]	-0.225282	0.50585	GSE227679
100529215	ZNF559-ZNF177	ZNF559-ZNF177 readthrough [Source:HGNC Symbol;Acc:HGNC:42964]	-0.185695	0.673543	GSE227679
100529215	ZNF177	zinc finger protein 177 [Source:HGNC Symbol;Acc:HGNC:12966]	-0.185695	0.673543	GSE227679
100529239	RPS10-NUDT3	RPS10-NUDT3 readthrough [Source:HGNC Symbol;Acc:HGNC:49181]	-0.156428	0.733422	GSE227679
100529240	ZNF816-ZNF321P	ZNF816-ZNF321P readthrough [Source:HGNC Symbol;Acc:HGNC:38879]	0.297116	0.499089	GSE227679
100529241	HSPE1-MOB4	HSPE1-MOB4 readthrough [Source:HGNC Symbol;Acc:HGNC:49184]	0.349919	0.33205	GSE227679
100529251	CKLF-CMTM1	CKLF-CMTM1 readthrough [Source:HGNC Symbol;Acc:HGNC:39977]	-0.0585735	0.945295	GSE227679
100529257	SYNJ2BP-COX16	SYNJ2BP-COX16 readthrough [Source:HGNC Symbol;Acc:HGNC:48350]	0.153464	0.727704	GSE227679
100529261	FNTB	farnesyltransferase, CAAX box, subunit beta [Source:HGNC Symbol;Acc:HGNC:3785]	0.023976	0.96416	GSE227679
100529261	CHURC1-FNTB	CHURC1-FNTB readthrough [Source:HGNC Symbol;Acc:HGNC:42960]	0.023976	0.96416	GSE227679
10053	AP1M2	adaptor related protein complex 1 subunit mu 2 [Source:HGNC Symbol;Acc:HGNC:558]	0.951364	0.203699	GSE227679
100532726	NDUFC2-KCTD14	NDUFC2-KCTD14 readthrough [Source:HGNC Symbol;Acc:HGNC:42956]	0.369528	0.482139	GSE227679
100532731	COMMD3-BMI1	COMMD3-BMI1 readthrough [Source:HGNC Symbol;Acc:HGNC:48326]	0.62987	0.0631133	GSE227679
100532736	NBL1	NBL1, DAN family BMP antagonist [Source:HGNC Symbol;Acc:HGNC:7650]	0.386831	0.311478	GSE227679
100533105	C8orf44-SGK3	C8orf44-SGK3 readthrough [Source:HGNC Symbol;Acc:HGNC:48354]	-0.264281	0.626909	GSE227679
100533106	ZHX1-C8orf76	ZHX1-C8orf76 readthrough [Source:HGNC Symbol;Acc:HGNC:42975]	0.270057	0.45184	GSE227679
100533177	KRTAP29-1	keratin associated like protein 29-1 [Source:HGNC Symbol;Acc:HGNC:34211]	-1.39409		GSE227679
100533181	FXYD6-FXYD2	FXYD6-FXYD2 readthrough [Source:HGNC Symbol;Acc:HGNC:39978]	-0.793394	0.0320129	GSE227679
100533182	SEC24B-AS1	SEC24B antisense RNA 1 [Source:HGNC Symbol;Acc:HGNC:44003]	-0.175232	0.832514	GSE227679
100533183	RFLNA	refilin A [Source:HGNC Symbol;Acc:HGNC:27051]	0.0948089	0.825447	GSE227679
100533467	BIVM-ERCC5	BIVM-ERCC5 readthrough [Source:HGNC Symbol;Acc:HGNC:43690]	-0.191007	0.207538	GSE227679
100533483	DNAAF4-CCPG1	DNAAF4-CCPG1 readthrough (NMD candidate) [Source:HGNC Symbol;Acc:HGNC:43019]	0.330486	0.302548	GSE227679
100533496	TVP23C-CDRT4	TVP23C-CDRT4 readthrough [Source:HGNC Symbol;Acc:HGNC:42961]	-0.282653	0.370265	GSE227679
100533952	RBAK-RBAKDN	RBAK-RBAKDN readthrough [Source:HGNC Symbol;Acc:HGNC:42971]	-0.0296989	0.956642	GSE227679
100534012	SCNM1	sodium channel modifier 1 [Source:HGNC Symbol;Acc:HGNC:23136]	0.0826678	0.827623	GSE227679
100534592	URGCP-MRPS24	URGCP-MRPS24 readthrough [Source:HGNC Symbol;Acc:HGNC:49188]	-0.132794	0.667627	GSE227679
100534599	ISY1-RAB43	ISY1-RAB43 readthrough [Source:HGNC Symbol;Acc:HGNC:42969]	0.139034	0.505491	GSE227679
10054	UBA2	ubiquitin like modifier activating enzyme 2 [Source:HGNC Symbol;Acc:HGNC:30661]	-0.0360063	0.915889	GSE227679
10055	SAE1	SUMO1 activating enzyme subunit 1 [Source:HGNC Symbol;Acc:HGNC:30660]	0.552978	0.00298153	GSE227679
10056	FARSB	phenylalanyl-tRNA synthetase subunit beta [Source:HGNC Symbol;Acc:HGNC:17800]	-0.0322549	0.926221	GSE227679
10057	ABCC5	ATP binding cassette subfamily C member 5 [Source:HGNC Symbol;Acc:HGNC:56]	0.724241	0.0369858	GSE227679
10058	ABCB6	ATP binding cassette subfamily B member 6 (LAN blood group) [Source:HGNC Symbol;Acc:HGNC:47]	0.301565	0.277546	GSE227679
10059	DNM1L	dynamin 1 like [Source:HGNC Symbol;Acc:HGNC:2973]	0.0971169	0.625702	GSE227679
1006	CDH8	cadherin 8 [Source:HGNC Symbol;Acc:HGNC:1767]	-0.592132	0.678306	GSE227679
10060	ABCC9	ATP binding cassette subfamily C member 9 [Source:HGNC Symbol;Acc:HGNC:60]	0.0385041	0.968462	GSE227679
10061	ABCF2	ATP binding cassette subfamily F member 2 [Source:HGNC Symbol;Acc:HGNC:71]	0.128913	0.601961	GSE227679
100616109	MIR4464	microRNA 4464 [Source:HGNC Symbol;Acc:HGNC:41528]	-1.77553		GSE227679
100616110	MIR2681	microRNA 2681 [Source:HGNC Symbol;Acc:HGNC:41532]	0.374502		GSE227679
100616111	MIR4455	microRNA 4455 [Source:HGNC Symbol;Acc:HGNC:41536]	1.25392		GSE227679
100616112	MIR4793	microRNA 4793 [Source:HGNC Symbol;Acc:HGNC:41538]	3.15906		GSE227679
100616113	MIR4680	microRNA 4680 [Source:HGNC Symbol;Acc:HGNC:41541]	-0.434699	0.444531	GSE227679
100616114	MIR4668	microRNA 4668 [Source:HGNC Symbol;Acc:HGNC:41545]	0.341914	0.858076	GSE227679
100616115	MIR4469	microRNA 4469 [Source:HGNC Symbol;Acc:HGNC:41556]	-0.139406	0.942235	GSE227679
100616116	MIR4648	microRNA 4648 [Source:HGNC Symbol;Acc:HGNC:41560]	-0.0758836	0.973034	GSE227679
100616117	MIR4653	microRNA 4653 [Source:HGNC Symbol;Acc:HGNC:41562]	2.82261		GSE227679
100616118	MIR4486	microRNA 4486 [Source:HGNC Symbol;Acc:HGNC:41566]	-1.17189		GSE227679
100616119	MIR4697	microRNA 4697 [Source:HGNC Symbol;Acc:HGNC:41570]	-1.6819	0.155678	GSE227679
100616120	MIR4695	microRNA 4695 [Source:HGNC Symbol;Acc:HGNC:41573]	-0.771144		GSE227679
100616121	MIR1268B	microRNA 1268b [Source:HGNC Symbol;Acc:HGNC:41581]	0.310864		GSE227679
100616122	MIR4523	microRNA 4523 [Source:HGNC Symbol;Acc:HGNC:41583]	-0.176765		GSE227679
100616123	MIR4436B1	microRNA 4436b-1 [Source:HGNC Symbol;Acc:HGNC:41587]	-1.4589		GSE227679
100616124	MIR4647	microRNA 4647 [Source:HGNC Symbol;Acc:HGNC:41594]	0.0630388	0.929582	GSE227679
100616125	MIR4731	microRNA 4731 [Source:HGNC Symbol;Acc:HGNC:41597]	-0.529377	0.711483	GSE227679
100616126	MIR4686	microRNA 4686 [Source:HGNC Symbol;Acc:HGNC:41601]			GSE227679
100616127	MIR4448	microRNA 4448 [Source:HGNC Symbol;Acc:HGNC:41604]			GSE227679
100616128	MIR4679-1	microRNA 4679-1 [Source:HGNC Symbol;Acc:HGNC:41612]			GSE227679
100616129	MIR4445	microRNA 4445 [Source:HGNC Symbol;Acc:HGNC:41614]			GSE227679
100616130	MIR4526	microRNA 4526 [Source:HGNC Symbol;Acc:HGNC:41618]	-0.210073	0.92732	GSE227679
100616131	MIR3689D1	microRNA 3689d-1 [Source:HGNC Symbol;Acc:HGNC:41621]	0.85187		GSE227679
100616132	MIR4728	microRNA 4728 [Source:HGNC Symbol;Acc:HGNC:41632]	0.606844	0.677512	GSE227679
100616133	MIR4699	microRNA 4699 [Source:HGNC Symbol;Acc:HGNC:41636]	0		GSE227679
100616134	MIR499B	microRNA 499b [Source:HGNC Symbol;Acc:HGNC:41640]	0.42557		GSE227679
100616135	MIR4507	microRNA 4507 [Source:HGNC Symbol;Acc:HGNC:41642]	0.697344		GSE227679
100616136	MIR4430	microRNA 4430 [Source:HGNC Symbol;Acc:HGNC:41646]			GSE227679
100616137	MIR4501	microRNA 4501 [Source:HGNC Symbol;Acc:HGNC:41650]	0.671535		GSE227679
100616138	MIR4787	microRNA 4787 [Source:HGNC Symbol;Acc:HGNC:41653]	-0.410475		GSE227679
100616139	MIR4741	microRNA 4741 [Source:HGNC Symbol;Acc:HGNC:41661]	-0.56973	0.31977	GSE227679
100616140	MIR4506	microRNA 4506 [Source:HGNC Symbol;Acc:HGNC:41663]	-1.12431		GSE227679
100616141	MIR4428	microRNA 4428 [Source:HGNC Symbol;Acc:HGNC:41667]	1.4785		GSE227679
100616142	MIR4458	microRNA 4458 [Source:HGNC Symbol;Acc:HGNC:41674]	-0.938834		GSE227679
100616143	MIR4763	microRNA 4763 [Source:HGNC Symbol;Acc:HGNC:41677]	-0.429163	0.678923	GSE227679
100616144	MIR548AN	microRNA 548an [Source:HGNC Symbol;Acc:HGNC:41681]	-0.474512		GSE227679
100616146	MIR4534	microRNA 4534 [Source:HGNC Symbol;Acc:HGNC:41692]	-1.06342		GSE227679
100616147	MIR4769	microRNA 4769 [Source:HGNC Symbol;Acc:HGNC:41694]	0.853456		GSE227679
100616148	MIR4760	microRNA 4760 [Source:HGNC Symbol;Acc:HGNC:41698]			GSE227679
100616149	MIR4512	microRNA 4512 [Source:HGNC Symbol;Acc:HGNC:41701]	-0.303055		GSE227679
100616150	MIR4720	microRNA 4720 [Source:HGNC Symbol;Acc:HGNC:41705]	-0.663056	0.395272	GSE227679
100616151	MIR4480	microRNA 4480 [Source:HGNC Symbol;Acc:HGNC:41716]	0.0114753	0.996869	GSE227679
100616152	MIR4804	microRNA 4804 [Source:HGNC Symbol;Acc:HGNC:41720]	1.03698	0.581472	GSE227679
100616153	MIR4726	microRNA 4726 [Source:HGNC Symbol;Acc:HGNC:41722]	-1.43706		GSE227679
100616154	MIR4466	microRNA 4466 [Source:HGNC Symbol;Acc:HGNC:41726]	0.13053		GSE227679
100616155	MIR4536-1	microRNA 4536-1 [Source:HGNC Symbol;Acc:HGNC:41730]	0.310864		GSE227679
100616157	MIR4772	microRNA 4772 [Source:HGNC Symbol;Acc:HGNC:41741]	0.671535		GSE227679
100616158	MIR4505	microRNA 4505 [Source:HGNC Symbol;Acc:HGNC:41743]	0.509249		GSE227679
100616159	MIR4779	microRNA 4779 [Source:HGNC Symbol;Acc:HGNC:41747]			GSE227679
100616160	MIR4655	microRNA 4655 [Source:HGNC Symbol;Acc:HGNC:41754]	-0.535356		GSE227679
100616161	MIR4795	microRNA 4795 [Source:HGNC Symbol;Acc:HGNC:41757]			GSE227679
100616162	MIR4483	microRNA 4483 [Source:HGNC Symbol;Acc:HGNC:41761]	-0.964686	0.741159	GSE227679
100616163	MIR4530	microRNA 4530 [Source:HGNC Symbol;Acc:HGNC:41764]	-1.23794	0.321519	GSE227679
100616164	MIR4420	microRNA 4420 [Source:HGNC Symbol;Acc:HGNC:41772]	2.68581		GSE227679
100616165	MIR4771-2	microRNA 4771-2 [Source:HGNC Symbol;Acc:HGNC:41774]	0.652025		GSE227679
100616166	MIR4796	microRNA 4796 [Source:HGNC Symbol;Acc:HGNC:41779]	-0.274268	0.92732	GSE227679
100616167	MIR4722	microRNA 4722 [Source:HGNC Symbol;Acc:HGNC:41782]	-0.529223	0.702409	GSE227679
100616168	MIR4754	microRNA 4754 [Source:HGNC Symbol;Acc:HGNC:41786]	-0.2857		GSE227679
100616169	MIR378D2	microRNA 378d-2 [Source:HGNC Symbol;Acc:HGNC:41797]	2.26436		GSE227679
100616170	MIR4739	microRNA 4739 [Source:HGNC Symbol;Acc:HGNC:41801]			GSE227679
100616171	MIR4752	microRNA 4752 [Source:HGNC Symbol;Acc:HGNC:41803]			GSE227679
100616172	MIR4719	microRNA 4719 [Source:HGNC Symbol;Acc:HGNC:41807]	-0.771144		GSE227679
100616173	MIR203B	microRNA 203b [Source:HGNC Symbol;Acc:HGNC:41811]	0.310864		GSE227679
100616174	MIR4643	microRNA 4643 [Source:HGNC Symbol;Acc:HGNC:41814]			GSE227679
100616175	MIR4633	microRNA 4633 [Source:HGNC Symbol;Acc:HGNC:41822]	-0.230139		GSE227679
100616176	MIR4708	microRNA 4708 [Source:HGNC Symbol;Acc:HGNC:41824]			GSE227679
100616178	MIR4641	microRNA 4641 [Source:HGNC Symbol;Acc:HGNC:41835]	0.908788		GSE227679
100616179	MIR4498	microRNA 4498 [Source:HGNC Symbol;Acc:HGNC:41838]	-0.397808		GSE227679
100616180	MIR4465	microRNA 4465 [Source:HGNC Symbol;Acc:HGNC:41842]			GSE227679
100616181	MIR4514	microRNA 4514 [Source:HGNC Symbol;Acc:HGNC:41845]	2.81933		GSE227679
100616182	MIR4500	microRNA 4500 [Source:HGNC Symbol;Acc:HGNC:41853]			GSE227679
100616183	MIR4513	microRNA 4513 [Source:HGNC Symbol;Acc:HGNC:41855]	0.97349		GSE227679
100616184	MIR4477A	microRNA 4477a [Source:HGNC Symbol;Acc:HGNC:41859]	1.47625	0.149374	GSE227679
100616185	MIR371B	microRNA 371b [Source:HGNC Symbol;Acc:HGNC:41863]			GSE227679
100616186	MIR4490	microRNA 4490 [Source:HGNC Symbol;Acc:HGNC:41871]			GSE227679
100616187	MIR4783	microRNA 4783 [Source:HGNC Symbol;Acc:HGNC:41874]	-0.672746		GSE227679
100616188	MIR3972	microRNA 3972 [Source:HGNC Symbol;Acc:HGNC:41876]			GSE227679
100616189	MIR4421	microRNA 4421 [Source:HGNC Symbol;Acc:HGNC:41879]	-2.10418		GSE227679
100616190	MIR548O2	microRNA 548o-2 [Source:HGNC Symbol;Acc:HGNC:41882]	3.55226		GSE227679
100616191	MIR548AJ1	microRNA 548aj-1 [Source:HGNC Symbol;Acc:HGNC:41884]			GSE227679
100616192	MIR4679-2	microRNA 4679-2 [Source:HGNC Symbol;Acc:HGNC:41890]			GSE227679
100616193	MIR4453	microRNA 4453 [Source:HGNC Symbol;Acc:HGNC:41892]	-0.902086	0.35714	GSE227679
100616194	MIR4477B	microRNA 4477b [Source:HGNC Symbol;Acc:HGNC:41898]	1.44737	0.123587	GSE227679
100616195	MIR4718	microRNA 4718 [Source:HGNC Symbol;Acc:HGNC:41900]	-2.73675		GSE227679
100616196	MIR4525	microRNA 4525 [Source:HGNC Symbol;Acc:HGNC:41903]	-0.666038		GSE227679
100616201	MIR378D1	microRNA 378d-1 [Source:HGNC Symbol;Acc:HGNC:41550]			GSE227679
100616202	MIR4634	microRNA 4634 [Source:HGNC Symbol;Acc:HGNC:41559]			GSE227679
100616203	MIR4734	microRNA 4734 [Source:HGNC Symbol;Acc:HGNC:41572]	-0.951479		GSE227679
100616204	MIR4729	microRNA 4729 [Source:HGNC Symbol;Acc:HGNC:41585]	-0.158959	0.93262	GSE227679
100616205	MIR4704	microRNA 4704 [Source:HGNC Symbol;Acc:HGNC:41602]			GSE227679
100616206	MIR4652	microRNA 4652 [Source:HGNC Symbol;Acc:HGNC:41615]	1.48536		GSE227679
100616207	MIR4439	microRNA 4439 [Source:HGNC Symbol;Acc:HGNC:41622]	2.33363		GSE227679
100616208	MIR4782	microRNA 4782 [Source:HGNC Symbol;Acc:HGNC:41635]	1.7045		GSE227679
100616210	MIR4737	microRNA 4737 [Source:HGNC Symbol;Acc:HGNC:41669]	0.342033	0.845006	GSE227679
100616211	MIR4709	microRNA 4709 [Source:HGNC Symbol;Acc:HGNC:41690]	0.156301	0.770206	GSE227679
100616212	MIR3689F	microRNA 3689f [Source:HGNC Symbol;Acc:HGNC:41702]			GSE227679
100616213	MIR4437	microRNA 4437 [Source:HGNC Symbol;Acc:HGNC:41715]	-0.478282		GSE227679
100616214	MIR4667	microRNA 4667 [Source:HGNC Symbol;Acc:HGNC:41723]	0.0316101		GSE227679
100616215	MIR548AL	microRNA 548al [Source:HGNC Symbol;Acc:HGNC:41736]	0.85187		GSE227679
100616216	MIR4797	microRNA 4797 [Source:HGNC Symbol;Acc:HGNC:41758]	1.48541		GSE227679
100616218	MIR3135B	microRNA 3135b [Source:HGNC Symbol;Acc:HGNC:41783]	1.52463		GSE227679
100616219	MIR4765	microRNA 4765 [Source:HGNC Symbol;Acc:HGNC:41791]	2.80318		GSE227679
100616220	MIR4736	microRNA 4736 [Source:HGNC Symbol;Acc:HGNC:41804]	-3.41692		GSE227679
100616221	MIR4662A	microRNA 4662a [Source:HGNC Symbol;Acc:HGNC:41826]			GSE227679
100616222	MIR4487	microRNA 4487 [Source:HGNC Symbol;Acc:HGNC:41851]	2.27603		GSE227679
100616223	MIR4509-1	microRNA 4509-1 [Source:HGNC Symbol;Acc:HGNC:41860]			GSE227679
100616224	MIR4753	microRNA 4753 [Source:HGNC Symbol;Acc:HGNC:41527]	-0.132977		GSE227679
100616225	MIR4756	microRNA 4756 [Source:HGNC Symbol;Acc:HGNC:41529]	2.46276		GSE227679
100616226	MIR4468	microRNA 4468 [Source:HGNC Symbol;Acc:HGNC:41533]			GSE227679
100616227	MIR4502	microRNA 4502 [Source:HGNC Symbol;Acc:HGNC:41534]	1.09584		GSE227679
100616228	MIR4509-2	microRNA 4509-2 [Source:HGNC Symbol;Acc:HGNC:41537]			GSE227679
100616229	MIR4473	microRNA 4473 [Source:HGNC Symbol;Acc:HGNC:41540]	-0.648174	0.755051	GSE227679
100616230	MIR4646	microRNA 4646 [Source:HGNC Symbol;Acc:HGNC:41543]	0.253033		GSE227679
100616231	MIR4519	microRNA 4519 [Source:HGNC Symbol;Acc:HGNC:41544]	-1.02872	0.570449	GSE227679
100616232	MIR4528	microRNA 4528 [Source:HGNC Symbol;Acc:HGNC:41547]			GSE227679
100616234	MIR4454	microRNA 4454 [Source:HGNC Symbol;Acc:HGNC:41553]			GSE227679
100616235	MIR4457	microRNA 4457 [Source:HGNC Symbol;Acc:HGNC:41554]			GSE227679
100616236	MIR4669	microRNA 4669 [Source:HGNC Symbol;Acc:HGNC:41558]	-1.26988		GSE227679
100616237	MIR4640	microRNA 4640 [Source:HGNC Symbol;Acc:HGNC:41561]	-0.439869	0.851485	GSE227679
100616238	MIR3529	microRNA 3529 [Source:HGNC Symbol;Acc:HGNC:41564]	-2.24706		GSE227679
100616239	MIR4705	microRNA 4705 [Source:HGNC Symbol;Acc:HGNC:41567]	0.972601		GSE227679
100616240	MIR4496	microRNA 4496 [Source:HGNC Symbol;Acc:HGNC:41569]	-0.489863	0.89025	GSE227679
100616241	MIR4717	microRNA 4717 [Source:HGNC Symbol;Acc:HGNC:41571]	1.48248		GSE227679
100616242	MIR4673	microRNA 4673 [Source:HGNC Symbol;Acc:HGNC:41574]	-1.23434	0.554083	GSE227679
100616243	MIR4759	microRNA 4759 [Source:HGNC Symbol;Acc:HGNC:41575]			GSE227679
100616244	MIR3976	microRNA 3976 [Source:HGNC Symbol;Acc:HGNC:41578]			GSE227679
100616245	MIR4661	microRNA 4661 [Source:HGNC Symbol;Acc:HGNC:41582]	-2.33733		GSE227679
100616246	MIR4799	microRNA 4799 [Source:HGNC Symbol;Acc:HGNC:41584]	-0.255504	0.918405	GSE227679
100616247	MIR151B	microRNA 151b [Source:HGNC Symbol;Acc:HGNC:41588]	1.61498	0.140147	GSE227679
100616248	MIR4724	microRNA 4724 [Source:HGNC Symbol;Acc:HGNC:41590]	1.3096	0.14059	GSE227679
100616249	MIR4768	microRNA 4768 [Source:HGNC Symbol;Acc:HGNC:41592]	-0.00493758	0.998688	GSE227679
100616250	MIR3960	microRNA 3960 [Source:HGNC Symbol;Acc:HGNC:41595]	-0.230141		GSE227679
100616251	MIR1587	microRNA 1587 [Source:HGNC Symbol;Acc:HGNC:41596]			GSE227679
100616252	MIR548AJ2	microRNA 548aj-2 [Source:HGNC Symbol;Acc:HGNC:41600]			GSE227679
100616253	MIR4762	microRNA 4762 [Source:HGNC Symbol;Acc:HGNC:41603]	-0.261941	0.91096	GSE227679
100616254	MIR548AH	microRNA 548ah [Source:HGNC Symbol;Acc:HGNC:41605]	-1.54504		GSE227679
100616255	MIR4662B	microRNA 4662b [Source:HGNC Symbol;Acc:HGNC:41607]			GSE227679
100616256	MIR4721	microRNA 4721 [Source:HGNC Symbol;Acc:HGNC:41609]	0.352989	0.361913	GSE227679
100616257	MIR3975	microRNA 3975 [Source:HGNC Symbol;Acc:HGNC:41613]	-0.0345417	0.990141	GSE227679
100616258	MIR4516	microRNA 4516 [Source:HGNC Symbol;Acc:HGNC:41617]	-0.658256		GSE227679
100616259	MIR378I	microRNA 378i [Source:HGNC Symbol;Acc:HGNC:41620]	0.516743	0.847624	GSE227679
100616260	MIR4663	microRNA 4663 [Source:HGNC Symbol;Acc:HGNC:41623]			GSE227679
100616261	MIR4504	microRNA 4504 [Source:HGNC Symbol;Acc:HGNC:41624]	-1.18319		GSE227679
100616262	MIR4701	microRNA 4701 [Source:HGNC Symbol;Acc:HGNC:41627]	0.071743	0.976924	GSE227679
100616263	MIR4485	microRNA 4485 [Source:HGNC Symbol;Acc:HGNC:41628]	-2.06803	0.161474	GSE227679
100616264	MIR4527	microRNA 4527 [Source:HGNC Symbol;Acc:HGNC:41633]			GSE227679
100616265	MIR4433A	microRNA 4433a [Source:HGNC Symbol;Acc:HGNC:41634]			GSE227679
100616266	MIR4733	microRNA 4733 [Source:HGNC Symbol;Acc:HGNC:41638]	-0.663064		GSE227679
100616267	MIR4776-1	microRNA 4776-1 [Source:HGNC Symbol;Acc:HGNC:41641]	-0.771144		GSE227679
100616268	MIR4472-1	microRNA 4472-1 [Source:HGNC Symbol;Acc:HGNC:41644]			GSE227679
100616269	MIR4639	microRNA 4639 [Source:HGNC Symbol;Acc:HGNC:41645]	-0.814309	0.717412	GSE227679
100616270	MIR4651	microRNA 4651 [Source:HGNC Symbol;Acc:HGNC:41647]	-0.517607		GSE227679
100616271	MIR4637	microRNA 4637 [Source:HGNC Symbol;Acc:HGNC:41651]	0.537351	0.808242	GSE227679
100616272	MIR4422	microRNA 4422 [Source:HGNC Symbol;Acc:HGNC:41654]			GSE227679
100616273	MIR451B	microRNA 451b [Source:HGNC Symbol;Acc:HGNC:41655]	-0.410474		GSE227679
100616274	MIR4802	microRNA 4802 [Source:HGNC Symbol;Acc:HGNC:41658]	0.569695	0.763	GSE227679
100616275	MIR4508	microRNA 4508 [Source:HGNC Symbol;Acc:HGNC:41659]			GSE227679
100616276	MIR4538	microRNA 4538 [Source:HGNC Symbol;Acc:HGNC:41664]	-1.3064		GSE227679
100616277	MIR4522	microRNA 4522 [Source:HGNC Symbol;Acc:HGNC:41668]	0.671535		GSE227679
100616278	MIR4540	microRNA 4540 [Source:HGNC Symbol;Acc:HGNC:41670]			GSE227679
100616279	MIR3974	microRNA 3974 [Source:HGNC Symbol;Acc:HGNC:41672]			GSE227679
100616280	MIR4503	microRNA 4503 [Source:HGNC Symbol;Acc:HGNC:41675]			GSE227679
100616282	MIR4738	microRNA 4738 [Source:HGNC Symbol;Acc:HGNC:41679]	-0.570618		GSE227679
100616283	MIR4766	microRNA 4766 [Source:HGNC Symbol;Acc:HGNC:41680]	-1.1995	0.66687	GSE227679
100616284	MIR4489	microRNA 4489 [Source:HGNC Symbol;Acc:HGNC:41685]	0.266048	0.865776	GSE227679
100616285	MIR4645	microRNA 4645 [Source:HGNC Symbol;Acc:HGNC:41689]	-1.19973		GSE227679
100616286	MIR4676	microRNA 4676 [Source:HGNC Symbol;Acc:HGNC:41691]	-0.450948		GSE227679
100616287	MIR4495	microRNA 4495 [Source:HGNC Symbol;Acc:HGNC:41693]			GSE227679
100616288	MIR4665	microRNA 4665 [Source:HGNC Symbol;Acc:HGNC:41696]	-1.44552		GSE227679
100616289	MIR4475	microRNA 4475 [Source:HGNC Symbol;Acc:HGNC:41697]			GSE227679
100616290	MIR4529	microRNA 4529 [Source:HGNC Symbol;Acc:HGNC:41703]	0.4912		GSE227679
100616291	MIR4791	microRNA 4791 [Source:HGNC Symbol;Acc:HGNC:41704]	-2.5265		GSE227679
100616292	MIR4690	microRNA 4690 [Source:HGNC Symbol;Acc:HGNC:41707]	0.507779		GSE227679
100616293	MIR4510	microRNA 4510 [Source:HGNC Symbol;Acc:HGNC:41708]	0.130529		GSE227679
100616294	MIR4740	microRNA 4740 [Source:HGNC Symbol;Acc:HGNC:41711]	-2.5013		GSE227679
100616295	MIR4764	microRNA 4764 [Source:HGNC Symbol;Acc:HGNC:41714]	-0.229901		GSE227679
100616296	MIR4678	microRNA 4678 [Source:HGNC Symbol;Acc:HGNC:41717]			GSE227679
100616297	MIR3977	microRNA 3977 [Source:HGNC Symbol;Acc:HGNC:41721]	0.85187		GSE227679
100616299	MIR4450	microRNA 4450 [Source:HGNC Symbol;Acc:HGNC:41725]	-4.95256		GSE227679
100616300	MIR4710	microRNA 4710 [Source:HGNC Symbol;Acc:HGNC:41727]	1.03379		GSE227679
100616301	MIR4674	microRNA 4674 [Source:HGNC Symbol;Acc:HGNC:41729]	-0.462227		GSE227679
100616302	MIR548X2	microRNA 548x-2 [Source:HGNC Symbol;Acc:HGNC:41734]			GSE227679
100616303	MIR3688-2	microRNA 3688-2 [Source:HGNC Symbol;Acc:HGNC:41735]	-1.59291		GSE227679
100616304	MIR4499	microRNA 4499 [Source:HGNC Symbol;Acc:HGNC:41739]	2.24595		GSE227679
100616305	MIR548AE1	microRNA 548ae-1 [Source:HGNC Symbol;Acc:HGNC:41742]			GSE227679
100616306	MIR378H	microRNA 378h [Source:HGNC Symbol;Acc:HGNC:41744]	0.290278	0.917339	GSE227679
100616307	MIR4757	microRNA 4757 [Source:HGNC Symbol;Acc:HGNC:41746]	-0.0529783		GSE227679
100616308	MIR4666A	microRNA 4666a [Source:HGNC Symbol;Acc:HGNC:41750]			GSE227679
100616309	MIR4472-2	microRNA 4472-2 [Source:HGNC Symbol;Acc:HGNC:41752]			GSE227679
100616310	MIR4650-1	microRNA 4650-1 [Source:HGNC Symbol;Acc:HGNC:41755]	2.3958		GSE227679
100616311	MIR3973	microRNA 3973 [Source:HGNC Symbol;Acc:HGNC:41756]	-0.274445	0.91869	GSE227679
100616312	MIR4478	microRNA 4478 [Source:HGNC Symbol;Acc:HGNC:41759]	0		GSE227679
100616313	MIR4749	microRNA 4749 [Source:HGNC Symbol;Acc:HGNC:41760]	0.0979459	0.971136	GSE227679
100616314	MIR4750	microRNA 4750 [Source:HGNC Symbol;Acc:HGNC:41765]	-1.06755	0.204666	GSE227679
100616315	MIR4781	microRNA 4781 [Source:HGNC Symbol;Acc:HGNC:41769]	0.130529		GSE227679
100616316	MIR4524A	microRNA 4524a [Source:HGNC Symbol;Acc:HGNC:41771]	-1.10751	0.375517	GSE227679
100616317	MIR4777	microRNA 4777 [Source:HGNC Symbol;Acc:HGNC:41773]	3.57109		GSE227679
100616318	MIR4664	microRNA 4664 [Source:HGNC Symbol;Acc:HGNC:41777]	1.21512	0.48342	GSE227679
100616319	MIR4493	microRNA 4493 [Source:HGNC Symbol;Acc:HGNC:41778]	-1.15366		GSE227679
100616320	MIR4481	microRNA 4481 [Source:HGNC Symbol;Acc:HGNC:41781]	3.13324		GSE227679
100616321	MIR378G	microRNA 378g [Source:HGNC Symbol;Acc:HGNC:41785]	0.567702		GSE227679
100616322	MIR4682	microRNA 4682 [Source:HGNC Symbol;Acc:HGNC:41788]	0.671535		GSE227679
100616323	MIR4482	microRNA 4482 [Source:HGNC Symbol;Acc:HGNC:41792]	-0.785999	0.643878	GSE227679
100616324	MIR1245B	microRNA 1245b [Source:HGNC Symbol;Acc:HGNC:41794]	0.666865	0.543591	GSE227679
100616325	MIR4460	microRNA 4460 [Source:HGNC Symbol;Acc:HGNC:41795]	1.8587		GSE227679
100616326	MIR4636	microRNA 4636 [Source:HGNC Symbol;Acc:HGNC:41798]	-3.82769		GSE227679
100616327	MIR4484	microRNA 4484 [Source:HGNC Symbol;Acc:HGNC:41799]	0.352918		GSE227679
100616328	MIR4424	microRNA 4424 [Source:HGNC Symbol;Acc:HGNC:41805]	1.62003		GSE227679
100616329	MIR4700	microRNA 4700 [Source:HGNC Symbol;Acc:HGNC:41806]	-0.184828	0.781345	GSE227679
100616330	MIR4491	microRNA 4491 [Source:HGNC Symbol;Acc:HGNC:41808]	-1.36386		GSE227679
100616331	MIR4650-2	microRNA 4650-2 [Source:HGNC Symbol;Acc:HGNC:41810]	1.91765		GSE227679
100616332	MIR4716	microRNA 4716 [Source:HGNC Symbol;Acc:HGNC:41812]	0.702562		GSE227679
100616333	MIR3689C	microRNA 3689c [Source:HGNC Symbol;Acc:HGNC:41816]	0		GSE227679
100616334	MIR4790	microRNA 4790 [Source:HGNC Symbol;Acc:HGNC:41820]			GSE227679
100616335	MIR219B	microRNA 219b [Source:HGNC Symbol;Acc:HGNC:41823]	-1.80893		GSE227679
100616336	MIR548AB	microRNA 548ab [Source:HGNC Symbol;Acc:HGNC:41825]			GSE227679
100616337	MIR4747	microRNA 4747 [Source:HGNC Symbol;Acc:HGNC:41827]	2.93307		GSE227679
100616338	MIR4794	microRNA 4794 [Source:HGNC Symbol;Acc:HGNC:41829]	-1.28755		GSE227679
100616339	MIR548AE2	microRNA 548ae-2 [Source:HGNC Symbol;Acc:HGNC:41831]			GSE227679
100616340	MIR4758	microRNA 4758 [Source:HGNC Symbol;Acc:HGNC:41836]	-0.178283	0.897726	GSE227679
100616341	MIR4435-2	microRNA 4435-2 [Source:HGNC Symbol;Acc:HGNC:41837]	0.88707	0.638176	GSE227679
100616342	MIR4638	microRNA 4638 [Source:HGNC Symbol;Acc:HGNC:41841]	0.130529		GSE227679
100616343	MIR4677	microRNA 4677 [Source:HGNC Symbol;Acc:HGNC:41844]	0.869452	0.688838	GSE227679
100616344	MIR3689D2	microRNA 3689d-2 [Source:HGNC Symbol;Acc:HGNC:41846]	0.130529		GSE227679
100616345	MIR4426	microRNA 4426 [Source:HGNC Symbol;Acc:HGNC:41848]	0.204155	0.83152	GSE227679
100616346	MIR4649	microRNA 4649 [Source:HGNC Symbol;Acc:HGNC:41852]	0.826457	0.412251	GSE227679
100616347	MIR548AI	microRNA 548ai [Source:HGNC Symbol;Acc:HGNC:41854]	1.03379		GSE227679
100616348	MIR4659A	microRNA 4659a [Source:HGNC Symbol;Acc:HGNC:41857]	-1.78756		GSE227679
100616349	MIR4451	microRNA 4451 [Source:HGNC Symbol;Acc:HGNC:41858]	-1.01816	0.577216	GSE227679
100616350	MIR4660	microRNA 4660 [Source:HGNC Symbol;Acc:HGNC:41861]	1.10372		GSE227679
100616351	MIR4670	microRNA 4670 [Source:HGNC Symbol;Acc:HGNC:41862]	1.80999		GSE227679
100616352	MIR4642	microRNA 4642 [Source:HGNC Symbol;Acc:HGNC:41865]	1.08218		GSE227679
100616354	MIR550A3	microRNA 550a-3 [Source:HGNC Symbol;Acc:HGNC:41870]	-0.993173	0.403313	GSE227679
100616355	MIR4531	microRNA 4531 [Source:HGNC Symbol;Acc:HGNC:41872]	2.24755		GSE227679
100616356	MIR4774	microRNA 4774 [Source:HGNC Symbol;Acc:HGNC:41873]	1.29331	0.498617	GSE227679
100616357	MIR3591	microRNA 3591 [Source:HGNC Symbol;Acc:HGNC:41875]			GSE227679
100616358	MIR4800	microRNA 4800 [Source:HGNC Symbol;Acc:HGNC:41877]	-0.54956	0.212801	GSE227679
100616359	MIR4730	microRNA 4730 [Source:HGNC Symbol;Acc:HGNC:41880]	-1.90146	0.285427	GSE227679
100616360	MIR2467	microRNA 2467 [Source:HGNC Symbol;Acc:HGNC:41881]	0.21014	0.932233	GSE227679
100616361	MIR4775	microRNA 4775 [Source:HGNC Symbol;Acc:HGNC:41885]	0.102252	0.928138	GSE227679
100616362	MIR4533	microRNA 4533 [Source:HGNC Symbol;Acc:HGNC:41886]	-2.03683		GSE227679
100616363	MIR4735	microRNA 4735 [Source:HGNC Symbol;Acc:HGNC:41888]	1.12033		GSE227679
100616364	MIR4785	microRNA 4785 [Source:HGNC Symbol;Acc:HGNC:41889]	-0.337378		GSE227679
100616365	MIR4425	microRNA 4425 [Source:HGNC Symbol;Acc:HGNC:41891]			GSE227679
100616366	MIR4743	microRNA 4743 [Source:HGNC Symbol;Acc:HGNC:41894]	-0.64337		GSE227679
100616367	MIR4467	microRNA 4467 [Source:HGNC Symbol;Acc:HGNC:41896]	0.384182		GSE227679
100616368	MIR4688	microRNA 4688 [Source:HGNC Symbol;Acc:HGNC:41897]	-0.546993		GSE227679
100616369	MIR4713	microRNA 4713 [Source:HGNC Symbol;Acc:HGNC:41899]			GSE227679
100616370	MIR4771-1	microRNA 4771-1 [Source:HGNC Symbol;Acc:HGNC:41901]	3.03074		GSE227679
100616371	MIR4746	microRNA 4746 [Source:HGNC Symbol;Acc:HGNC:41904]	-0.552177	0.781556	GSE227679
100616372	MIR4659B	microRNA 4659b [Source:HGNC Symbol;Acc:HGNC:41530]	-1.78756		GSE227679
100616373	MIR4770	microRNA 4770 [Source:HGNC Symbol;Acc:HGNC:41542]			GSE227679
100616374	MIR4539	microRNA 4539 [Source:HGNC Symbol;Acc:HGNC:41546]	-0.0369005	0.990965	GSE227679
100616375	MIR4438	microRNA 4438 [Source:HGNC Symbol;Acc:HGNC:41555]	0.4912		GSE227679
100616376	MIR4492	microRNA 4492 [Source:HGNC Symbol;Acc:HGNC:41563]	-1.37262	0.526924	GSE227679
100616377	MIR4803	microRNA 4803 [Source:HGNC Symbol;Acc:HGNC:41568]	1.16875	0.66917	GSE227679
100616378	MIR4784	microRNA 4784 [Source:HGNC Symbol;Acc:HGNC:41580]	0.0691339	0.977103	GSE227679
100616379	MIR4511	microRNA 4511 [Source:HGNC Symbol;Acc:HGNC:41589]			GSE227679
100616380	MIR4671	microRNA 4671 [Source:HGNC Symbol;Acc:HGNC:41598]			GSE227679
100616381	MIR4456	microRNA 4456 [Source:HGNC Symbol;Acc:HGNC:41606]			GSE227679
100616382	MIR4509-3	microRNA 4509-3 [Source:HGNC Symbol;Acc:HGNC:41610]			GSE227679
100616383	MIR4675	microRNA 4675 [Source:HGNC Symbol;Acc:HGNC:41619]	-3.31638		GSE227679
100616384	MIR548AC	microRNA 548ac [Source:HGNC Symbol;Acc:HGNC:41626]	0.414486		GSE227679
100616385	MIR4732	microRNA 4732 [Source:HGNC Symbol;Acc:HGNC:41639]	-2.94153		GSE227679
100616386	MIR4654	microRNA 4654 [Source:HGNC Symbol;Acc:HGNC:41643]	-0.189501		GSE227679
100616387	MIR3064	microRNA 3064 [Source:HGNC Symbol;Acc:HGNC:41652]	0.113264	0.815704	GSE227679
100616388	MIR4723	microRNA 4723 [Source:HGNC Symbol;Acc:HGNC:41660]	-0.551135		GSE227679
100616389	MIR4463	microRNA 4463 [Source:HGNC Symbol;Acc:HGNC:41665]	-1.46282		GSE227679
100616390	MIR4427	microRNA 4427 [Source:HGNC Symbol;Acc:HGNC:41678]	1.40834	0.701605	GSE227679
100616391	MIR4684	microRNA 4684 [Source:HGNC Symbol;Acc:HGNC:41695]	1.44249		GSE227679
100616392	MIR4773-1	microRNA 4773-1 [Source:HGNC Symbol;Acc:HGNC:41699]			GSE227679
100616393	MIR4657	microRNA 4657 [Source:HGNC Symbol;Acc:HGNC:41706]	0.38838	0.465543	GSE227679
100616394	MIR4444-1	microRNA 4444-1 [Source:HGNC Symbol;Acc:HGNC:41710]	0.106488	0.668298	GSE227679
100616395	MIR4789	microRNA 4789 [Source:HGNC Symbol;Acc:HGNC:41719]	-1.20415		GSE227679
100616396	MIR4712	microRNA 4712 [Source:HGNC Symbol;Acc:HGNC:41732]	-0.2586	0.868306	GSE227679
100616397	MIR4440	microRNA 4440 [Source:HGNC Symbol;Acc:HGNC:41740]	-2.25999		GSE227679
100616398	MIR4681	microRNA 4681 [Source:HGNC Symbol;Acc:HGNC:41753]	1.48679		GSE227679
100616399	MIR4436A	microRNA 4436a [Source:HGNC Symbol;Acc:HGNC:41762]	0		GSE227679
100616400	MIR3198-2	microRNA 3198-2 [Source:HGNC Symbol;Acc:HGNC:41766]	-0.0417264	0.935948	GSE227679
100616401	MIR4520-1	microRNA 4520-1 [Source:HGNC Symbol;Acc:HGNC:41775]	-0.74199		GSE227679
100616402	MIR4696	microRNA 4696 [Source:HGNC Symbol;Acc:HGNC:41780]	-0.771144		GSE227679
100616403	MIR4691	microRNA 4691 [Source:HGNC Symbol;Acc:HGNC:41796]	-0.573244	0.810743	GSE227679
100616404	MIR4515	microRNA 4515 [Source:HGNC Symbol;Acc:HGNC:41800]	0.85187		GSE227679
100616405	MIR4518	microRNA 4518 [Source:HGNC Symbol;Acc:HGNC:41809]	-0.887331		GSE227679
100616406	MIR4521	microRNA 4521 [Source:HGNC Symbol;Acc:HGNC:41813]	-1.82982		GSE227679
100616407	MIR4443	microRNA 4443 [Source:HGNC Symbol;Acc:HGNC:41830]			GSE227679
100616408	MIR5047	microRNA 5047 [Source:HGNC Symbol;Acc:HGNC:41834]	-0.0706014	0.911449	GSE227679
100616409	MIR4711	microRNA 4711 [Source:HGNC Symbol;Acc:HGNC:41847]	-2.81763		GSE227679
100616410	MIR4692	microRNA 4692 [Source:HGNC Symbol;Acc:HGNC:41856]	1.70773		GSE227679
100616413	MIR4462	microRNA 4462 [Source:HGNC Symbol;Acc:HGNC:41549]			GSE227679
100616414	MIR4761	microRNA 4761 [Source:HGNC Symbol;Acc:HGNC:41591]	-0.205993	0.551141	GSE227679
100616415	MIR4535	microRNA 4535 [Source:HGNC Symbol;Acc:HGNC:41629]	0.130529		GSE227679
100616416	MIR4727	microRNA 4727 [Source:HGNC Symbol;Acc:HGNC:41709]	0.73517		GSE227679
100616417	MIR4786	microRNA 4786 [Source:HGNC Symbol;Acc:HGNC:41751]	0.208657		GSE227679
100616418	MIR4773-2	microRNA 4773-2 [Source:HGNC Symbol;Acc:HGNC:41790]			GSE227679
100616419	MIR4434	microRNA 4434 [Source:HGNC Symbol;Acc:HGNC:41832]	2.14064		GSE227679
100616420	MIR4744	microRNA 4744 [Source:HGNC Symbol;Acc:HGNC:41866]	-2.99047	0.256575	GSE227679
100616421	MIR4689	microRNA 4689 [Source:HGNC Symbol;Acc:HGNC:41895]	-0.756189		GSE227679
100616422	MIR4537	microRNA 4537 [Source:HGNC Symbol;Acc:HGNC:41682]	0.340572		GSE227679
100616423	MIR4703	microRNA 4703 [Source:HGNC Symbol;Acc:HGNC:41817]			GSE227679
100616424	MIR4707	microRNA 4707 [Source:HGNC Symbol;Acc:HGNC:41531]	-0.424407	0.303312	GSE227679
100616425	MIR4748	microRNA 4748 [Source:HGNC Symbol;Acc:HGNC:41557]	-0.584693	0.855329	GSE227679
100616426	MIR4694	microRNA 4694 [Source:HGNC Symbol;Acc:HGNC:41586]	-2.72649	0.213493	GSE227679
100616428	MIR548AM	microRNA 548am [Source:HGNC Symbol;Acc:HGNC:41637]	2.81679		GSE227679
100616429	MIR4672	microRNA 4672 [Source:HGNC Symbol;Acc:HGNC:41662]	-1.77553		GSE227679
100616430	MIR4644	microRNA 4644 [Source:HGNC Symbol;Acc:HGNC:41687]	-1.40652	0.389749	GSE227679
100616431	MIR4431	microRNA 4431 [Source:HGNC Symbol;Acc:HGNC:41738]			GSE227679
100616432	MIR4714	microRNA 4714 [Source:HGNC Symbol;Acc:HGNC:41763]	-0.0476909	0.970115	GSE227679
100616433	MIR4418	microRNA 4418 [Source:HGNC Symbol;Acc:HGNC:41789]			GSE227679
100616434	MIR4755	microRNA 4755 [Source:HGNC Symbol;Acc:HGNC:41815]	0.122055	0.955946	GSE227679
100616435	MIR4801	microRNA 4801 [Source:HGNC Symbol;Acc:HGNC:41840]	-1.15366		GSE227679
100616436	MIR4449	microRNA 4449 [Source:HGNC Symbol;Acc:HGNC:41864]	-0.439121		GSE227679
100616437	MIR1343	microRNA 1343 [Source:HGNC Symbol;Acc:HGNC:41902]	0.833729		GSE227679
100616438	MIR4632	microRNA 4632 [Source:HGNC Symbol;Acc:HGNC:41593]	0.487961		GSE227679
100616439	MIR4658	microRNA 4658 [Source:HGNC Symbol;Acc:HGNC:41673]	0.511823	0.526933	GSE227679
100616440	MIR548AG2	microRNA 548ag-2 [Source:HGNC Symbol;Acc:HGNC:41745]	-1.39409		GSE227679
100616441	MIR4474	microRNA 4474 [Source:HGNC Symbol;Acc:HGNC:41821]	-1.09153		GSE227679
100616447	MIR4780	microRNA 4780 [Source:HGNC Symbol;Acc:HGNC:41552]	0		GSE227679
100616449	MIR4725	microRNA 4725 [Source:HGNC Symbol;Acc:HGNC:41608]	-0.165356	0.925525	GSE227679
100616450	MIR548AG1	microRNA 548ag-1 [Source:HGNC Symbol;Acc:HGNC:41625]			GSE227679
100616451	MIR4471	microRNA 4471 [Source:HGNC Symbol;Acc:HGNC:41657]			GSE227679
100616452	MIR2682	microRNA 2682 [Source:HGNC Symbol;Acc:HGNC:41688]			GSE227679
100616453	MIR4687	microRNA 4687 [Source:HGNC Symbol;Acc:HGNC:41712]	-0.428734	0.572727	GSE227679
100616454	MIR4497	microRNA 4497 [Source:HGNC Symbol;Acc:HGNC:41737]	-1.24609		GSE227679
100616455	MIR548H5	microRNA 548h-5 [Source:HGNC Symbol;Acc:HGNC:41768]			GSE227679
100616456	MIR4476	microRNA 4476 [Source:HGNC Symbol;Acc:HGNC:41793]			GSE227679
100616457	MIR4693	microRNA 4693 [Source:HGNC Symbol;Acc:HGNC:41818]	0		GSE227679
100616459	MIR4745	microRNA 4745 [Source:HGNC Symbol;Acc:HGNC:41868]	0.75115		GSE227679
100616460	MIR3689E	microRNA 3689e [Source:HGNC Symbol;Acc:HGNC:41887]	1.41349		GSE227679
100616463	MIR4452	microRNA 4452 [Source:HGNC Symbol;Acc:HGNC:41539]	-0.829044		GSE227679
100616464	MIR4778	microRNA 4778 [Source:HGNC Symbol;Acc:HGNC:41648]	-3.08598		GSE227679
100616465	MIR4656	microRNA 4656 [Source:HGNC Symbol;Acc:HGNC:41749]	-0.91495		GSE227679
100616466	MIR4520-2	microRNA 4520-2 [Source:HGNC Symbol;Acc:HGNC:41839]	-0.00444827		GSE227679
100616467	MIR4767	microRNA 4767 [Source:HGNC Symbol;Acc:HGNC:41548]	-0.612288		GSE227679
100616468	MIR4742	microRNA 4742 [Source:HGNC Symbol;Acc:HGNC:41565]	0.299193	0.873579	GSE227679
100616469	MIR4429	microRNA 4429 [Source:HGNC Symbol;Acc:HGNC:41579]	0.487331		GSE227679
100616470	MIR4488	microRNA 4488 [Source:HGNC Symbol;Acc:HGNC:41599]	-1.39409		GSE227679
100616471	MIR4798	microRNA 4798 [Source:HGNC Symbol;Acc:HGNC:41616]	0.968136		GSE227679
100616472	MIR4776-2	microRNA 4776-2 [Source:HGNC Symbol;Acc:HGNC:41631]	-0.771144		GSE227679
100616473	MIR4432	microRNA 4432 [Source:HGNC Symbol;Acc:HGNC:41649]			GSE227679
100616474	MIR4715	microRNA 4715 [Source:HGNC Symbol;Acc:HGNC:41666]	1.8561		GSE227679
100616475	MIR548AD	microRNA 548ad [Source:HGNC Symbol;Acc:HGNC:41683]			GSE227679
100616476	MIR4446	microRNA 4446 [Source:HGNC Symbol;Acc:HGNC:41700]	0.874707	0.787118	GSE227679
100616477	MIR4442	microRNA 4442 [Source:HGNC Symbol;Acc:HGNC:41718]	-0.0524571	0.940573	GSE227679
100616478	MIR4494	microRNA 4494 [Source:HGNC Symbol;Acc:HGNC:41731]			GSE227679
100616479	MIR4635	microRNA 4635 [Source:HGNC Symbol;Acc:HGNC:41748]	0.720891	0.686766	GSE227679
100616480	MIR4479	microRNA 4479 [Source:HGNC Symbol;Acc:HGNC:41767]	0.13053		GSE227679
100616481	MIR4423	microRNA 4423 [Source:HGNC Symbol;Acc:HGNC:41784]			GSE227679
100616482	MIR4685	microRNA 4685 [Source:HGNC Symbol;Acc:HGNC:41802]	0.30646		GSE227679
100616483	MIR4751	microRNA 4751 [Source:HGNC Symbol;Acc:HGNC:41819]	0.791345	0.234513	GSE227679
100616484	MIR4470	microRNA 4470 [Source:HGNC Symbol;Acc:HGNC:41833]	-1.47455		GSE227679
100616485	MIR4447	microRNA 4447 [Source:HGNC Symbol;Acc:HGNC:41850]			GSE227679
100616486	MIR4698	microRNA 4698 [Source:HGNC Symbol;Acc:HGNC:41867]	0.0717863		GSE227679
100616487	MIR4517	microRNA 4517 [Source:HGNC Symbol;Acc:HGNC:41878]	-0.694573	0.793175	GSE227679
100616488	MIR548AK	microRNA 548ak [Source:HGNC Symbol;Acc:HGNC:41893]	-0.54722		GSE227679
100616490	MIR4706	microRNA 4706 [Source:HGNC Symbol;Acc:HGNC:41576]	1.08675		GSE227679
100616491	MIR3978	microRNA 3978 [Source:HGNC Symbol;Acc:HGNC:41630]	-2.03079	0.509159	GSE227679
100616492	MIR378F	microRNA 378f [Source:HGNC Symbol;Acc:HGNC:41686]			GSE227679
100616493	MIR4441	microRNA 4441 [Source:HGNC Symbol;Acc:HGNC:41728]	-0.985225	0.413583	GSE227679
100616494	MIR1269B	microRNA 1269b [Source:HGNC Symbol;Acc:HGNC:41787]	-1.38462		GSE227679
100616495	MIR2392	microRNA 2392 [Source:HGNC Symbol;Acc:HGNC:41843]			GSE227679
100616498	MIR378E	microRNA 378e [Source:HGNC Symbol;Acc:HGNC:41671]	1.68325		GSE227679
100616499	MIR4435-1	microRNA 4435-1 [Source:HGNC Symbol;Acc:HGNC:41713]	-0.165931	0.952933	GSE227679
100616500	MIR4683	microRNA 4683 [Source:HGNC Symbol;Acc:HGNC:41883]	-0.548781	0.642248	GSE227679
100616530	CFAP418-AS1	CFAP418 antisense RNA 1 [Source:HGNC Symbol;Acc:HGNC:50444]	-0.257241	0.88214	GSE227679
10062	NR1H3	nuclear receptor subfamily 1 group H member 3 [Source:HGNC Symbol;Acc:HGNC:7966]	-0.241389	0.566554	GSE227679
100628307	DIO2-AS1	DIO2 antisense RNA 1 [Source:HGNC Symbol;Acc:HGNC:44153]	1.34975	0.24714	GSE227679
100628560	MIR3155B	microRNA 3155b [Source:HGNC Symbol;Acc:HGNC:50003]	-0.18576		GSE227679
10063	COX17	cytochrome c oxidase copper chaperone COX17 [Source:HGNC Symbol;Acc:HGNC:2264]	0.344838	0.544807	GSE227679
100631383	FAM47E-STBD1	FAM47E-STBD1 readthrough [Source:HGNC Symbol;Acc:HGNC:44667]	-0.176044	0.785097	GSE227679
100652739	RAET1E-AS1	RAET1E antisense RNA 1 [Source:HGNC Symbol;Acc:HGNC:48994]	0.224928	0.863543	GSE227679
100652740	PYCARD-AS1	PYCARD antisense RNA 1 [Source:HGNC Symbol;Acc:HGNC:45036]	0.311714	0.616391	GSE227679
100652748	TIMM23B	translocase of inner mitochondrial membrane 23 homolog B [Source:HGNC Symbol;Acc:HGNC:23581]	-0.0854963	0.796562	GSE227679
100652749	SPATA8-AS1	SPATA8 antisense RNA 1 (head to head) [Source:HGNC Symbol;Acc:HGNC:48627]	0.130529		GSE227679
100652777	PLA2G10	phospholipase A2 group X [Source:HGNC Symbol;Acc:HGNC:9029]	0.93177	0.0978908	GSE227679
100652824	KIAA2012	KIAA2012 [Source:HGNC Symbol;Acc:HGNC:51250]	0.849862	0.551088	GSE227679
100652846	ITFG2-AS1	ITFG2 antisense RNA 1 [Source:HGNC Symbol;Acc:HGNC:53128]	-0.252761	0.768711	GSE227679
100652909	LINC00904	long intergenic non-protein coding RNA 904 [Source:HGNC Symbol;Acc:HGNC:44325]			GSE227679
100652929	LINC02078	long intergenic non-protein coding RNA 2078 [Source:HGNC Symbol;Acc:HGNC:52926]	2.11537		GSE227679
100652997	LINC00706	long intergenic non-protein coding RNA 706 [Source:HGNC Symbol;Acc:HGNC:44690]	-0.410475		GSE227679
100653515	CEP295NL	CEP295 N-terminal like [Source:HGNC Symbol;Acc:HGNC:44659]	-0.384003	0.631077	GSE227679
10066	SCAMP2	secretory carrier membrane protein 2 [Source:HGNC Symbol;Acc:HGNC:10564]	0.305752	0.121522	GSE227679
10067	SCAMP3	secretory carrier membrane protein 3 [Source:HGNC Symbol;Acc:HGNC:10565]	0.409094	0.0622918	GSE227679
10068	IL18BP	interleukin 18 binding protein [Source:HGNC Symbol;Acc:HGNC:5987]	-0.104847	0.802602	GSE227679
10069	RWDD2B	RWD domain containing 2B [Source:HGNC Symbol;Acc:HGNC:1302]	0.0339103	0.952405	GSE227679
1007	CDH9	cadherin 9 [Source:HGNC Symbol;Acc:HGNC:1768]	1.03379		GSE227679
10071	MUC12	mucin 12, cell surface associated [Source:HGNC Symbol;Acc:HGNC:7510]	0.51698	0.643185	GSE227679
10072	DPP3	dipeptidyl peptidase 3 [Source:HGNC Symbol;Acc:HGNC:3008]	0.850804	0.0238992	GSE227679
10073	SNUPN	snurportin 1 [Source:HGNC Symbol;Acc:HGNC:14245]	-0.062881	0.869099	GSE227679
10075	HUWE1	HECT, UBA and WWE domain containing E3 ubiquitin protein ligase 1 [Source:HGNC Symbol;Acc:HGNC:30892]	0.108768	0.576454	GSE227679
100750225	PCAT1	prostate cancer associated transcript 1 [Source:HGNC Symbol;Acc:HGNC:43022]	-0.70818	0.438793	GSE227679
100750325	RCAN3AS	NCMAP divergent transcript [Source:HGNC Symbol;Acc:HGNC:54327]	-0.0723356	0.973034	GSE227679
100750325	NCMAP-DT	NCMAP divergent transcript [Source:HGNC Symbol;Acc:HGNC:54327]	-0.0723356	0.973034	GSE227679
100750326	HTT-AS	HTT antisense RNA [Source:HGNC Symbol;Acc:HGNC:37118]	-0.973941	0.714956	GSE227679
10076	PTPRU	protein tyrosine phosphatase receptor type U [Source:HGNC Symbol;Acc:HGNC:9683]	0.224989	0.677134	GSE227679
10077	TSPAN32	tetraspanin 32 [Source:HGNC Symbol;Acc:HGNC:13410]	-0.42435	0.560558	GSE227679
100775107	RBM5-AS1	RBM5 antisense RNA 1 [Source:HGNC Symbol;Acc:HGNC:48871]	-0.215939	0.450375	GSE227679
10078	TSSC4	tumor suppressing subtransferable candidate 4 [Source:HGNC Symbol;Acc:HGNC:12386]	-0.0603776	0.875472	GSE227679
10079	ATP9A	ATPase phospholipid transporting 9A (putative) [Source:HGNC Symbol;Acc:HGNC:13540]	0.254569	0.428813	GSE227679
1008	CDH10	cadherin 10 [Source:HGNC Symbol;Acc:HGNC:1749]	-0.747821		GSE227679
10081	PDCD7	programmed cell death 7 [Source:HGNC Symbol;Acc:HGNC:8767]	-0.172525	0.475615	GSE227679
10082	GPC6	glypican 6 [Source:HGNC Symbol;Acc:HGNC:4454]	0.85332	0.220982	GSE227679
100820709	LINC00501	long intergenic non-protein coding RNA 501 [Source:HGNC Symbol;Acc:HGNC:43439]	-1.03342		GSE227679
100820829	MYZAP	myocardial zonula adherens protein [Source:HGNC Symbol;Acc:HGNC:43444]	-0.607507	0.461776	GSE227679
10083	USH1C	USH1 protein network component harmonin [Source:HGNC Symbol;Acc:HGNC:12597]	-1.15568	0.598848	GSE227679
10084	PQBP1	polyglutamine binding protein 1 [Source:HGNC Symbol;Acc:HGNC:9330]	-0.103826	0.763	GSE227679
100846978	LINC00506	long intergenic non-protein coding RNA 506 [Source:HGNC Symbol;Acc:HGNC:43557]	-0.984503	0.352194	GSE227679
100846991	MIR5197	microRNA 5197 [Source:HGNC Symbol;Acc:HGNC:43450]			GSE227679
100846992	MIR548AW	microRNA 548aw [Source:HGNC Symbol;Acc:HGNC:43454]	-0.59081		GSE227679
100846993	MIR5009	microRNA 5009 [Source:HGNC Symbol;Acc:HGNC:43458]	-0.372438	0.897586	GSE227679
100846994	MIR3670-2	microRNA 3670-2 [Source:HGNC Symbol;Acc:HGNC:43460]	-0.771143		GSE227679
100846995	MIR5000	microRNA 5000 [Source:HGNC Symbol;Acc:HGNC:43464]	-2.22893	0.256866	GSE227679
100846996	MIR5007	microRNA 5007 [Source:HGNC Symbol;Acc:HGNC:43468]			GSE227679
100846997	MIR5583-2	microRNA 5583-2 [Source:HGNC Symbol;Acc:HGNC:43471]	0.130529		GSE227679
100846998	MIR5689	microRNA 5689 [Source:HGNC Symbol;Acc:HGNC:43479]			GSE227679
100846999	MIR4444-2	microRNA 4444-2 [Source:HGNC Symbol;Acc:HGNC:43481]	-0.269817	0.765255	GSE227679
100847000	MIR5579	microRNA 5579 [Source:HGNC Symbol;Acc:HGNC:43485]	-0.101804		GSE227679
100847001	MIR5680	microRNA 5680 [Source:HGNC Symbol;Acc:HGNC:43492]			GSE227679
100847002	MIR5011	microRNA 5011 [Source:HGNC Symbol;Acc:HGNC:43496]			GSE227679
100847003	MIR5693	microRNA 5693 [Source:HGNC Symbol;Acc:HGNC:43499]	0.469928		GSE227679
100847004	MIR5188	microRNA 5188 [Source:HGNC Symbol;Acc:HGNC:43502]	1.7383	0.59066	GSE227679
100847005	MIR5701-2	microRNA 5701-2 [Source:HGNC Symbol;Acc:HGNC:43510]			GSE227679
100847006	MIR5571	microRNA 5571 [Source:HGNC Symbol;Acc:HGNC:43513]	1.8107		GSE227679
100847007	MIR5696	microRNA 5696 [Source:HGNC Symbol;Acc:HGNC:43516]			GSE227679
100847008	MIR4524B	microRNA 4524b [Source:HGNC Symbol;Acc:HGNC:43520]	-0.960007	0.430818	GSE227679
100847009	MIR1295B	microRNA 1295b [Source:HGNC Symbol;Acc:HGNC:43524]	-1.63115		GSE227679
100847010	MIR5581	microRNA 5581 [Source:HGNC Symbol;Acc:HGNC:43527]	0.139588	0.938372	GSE227679
100847012	MIR5004	microRNA 5004 [Source:HGNC Symbol;Acc:HGNC:43532]	0.397319	0.633126	GSE227679
100847013	MIR5692B	microRNA 5692b [Source:HGNC Symbol;Acc:HGNC:43535]	0.375859		GSE227679
100847014	MIR5100	microRNA 5100 [Source:HGNC Symbol;Acc:HGNC:43540]			GSE227679
100847015	MIR5691	microRNA 5691 [Source:HGNC Symbol;Acc:HGNC:43545]	1.86632	0.446698	GSE227679
100847016	MIR5695	microRNA 5695 [Source:HGNC Symbol;Acc:HGNC:43548]	0.192705		GSE227679
100847017	MIR5692C2	microRNA 5692c-2 [Source:HGNC Symbol;Acc:HGNC:43448]	0.771247	0.611983	GSE227679
100847018	MIR5585	microRNA 5585 [Source:HGNC Symbol;Acc:HGNC:43452]	-2.06497		GSE227679
100847019	MIR5687	microRNA 5687 [Source:HGNC Symbol;Acc:HGNC:43457]	-0.0464607	0.985624	GSE227679
100847020	MIR5582	microRNA 5582 [Source:HGNC Symbol;Acc:HGNC:43461]	2.20602		GSE227679
100847021	MIR5002	microRNA 5002 [Source:HGNC Symbol;Acc:HGNC:43470]	-1.2184	0.610023	GSE227679
100847022	MIR5093	microRNA 5093 [Source:HGNC Symbol;Acc:HGNC:43474]	1.05351		GSE227679
100847023	MIR5091	microRNA 5091 [Source:HGNC Symbol;Acc:HGNC:43478]	0.0804186		GSE227679
100847024	MIR5698	microRNA 5698 [Source:HGNC Symbol;Acc:HGNC:43487]	0		GSE227679
100847025	MIR5583-1	microRNA 5583-1 [Source:HGNC Symbol;Acc:HGNC:43491]	0.130529		GSE227679
100847026	MIR5006	microRNA 5006 [Source:HGNC Symbol;Acc:HGNC:43495]	-0.122362	0.913057	GSE227679
100847027	MIR5705	microRNA 5705 [Source:HGNC Symbol;Acc:HGNC:43504]			GSE227679
100847028	MIR5587	microRNA 5587 [Source:HGNC Symbol;Acc:HGNC:43508]	-0.18392	0.936156	GSE227679
100847029	MIR5003	microRNA 5003 [Source:HGNC Symbol;Acc:HGNC:43512]	-1.81218	0.404773	GSE227679
100847030	MIR548AT	microRNA 548at [Source:HGNC Symbol;Acc:HGNC:43517]	1.40726	0.390126	GSE227679
100847031	MIR5700	microRNA 5700 [Source:HGNC Symbol;Acc:HGNC:43521]			GSE227679
100847032	MIR5707	microRNA 5707 [Source:HGNC Symbol;Acc:HGNC:43449]	2.18942		GSE227679
100847033	MIR4436B2	microRNA 4436b-2 [Source:HGNC Symbol;Acc:HGNC:43451]	-0.919391		GSE227679
100847034	MIR5683	microRNA 5683 [Source:HGNC Symbol;Acc:HGNC:43453]	-0.522982		GSE227679
100847035	MIR548AR	microRNA 548ar [Source:HGNC Symbol;Acc:HGNC:43455]	0.688278	0.605321	GSE227679
100847036	MIR5186	microRNA 5186 [Source:HGNC Symbol;Acc:HGNC:43459]	-3.48716		GSE227679
100847037	MIR5001	microRNA 5001 [Source:HGNC Symbol;Acc:HGNC:43462]	0.366709	0.797152	GSE227679
100847038	MIR5692A2	microRNA 5692a-2 [Source:HGNC Symbol;Acc:HGNC:43466]			GSE227679
100847039	MIR5092	microRNA 5092 [Source:HGNC Symbol;Acc:HGNC:43467]	2.86598		GSE227679
100847040	MIR5704	microRNA 5704 [Source:HGNC Symbol;Acc:HGNC:43469]			GSE227679
100847041	MIR3680-2	microRNA 3680-2 [Source:HGNC Symbol;Acc:HGNC:43472]	0.377351		GSE227679
100847042	MIR5572	microRNA 5572 [Source:HGNC Symbol;Acc:HGNC:43476]	1.41363	0.492634	GSE227679
100847043	MIR5682	microRNA 5682 [Source:HGNC Symbol;Acc:HGNC:43477]			GSE227679
100847044	MIR5087	microRNA 5087 [Source:HGNC Symbol;Acc:HGNC:43480]	-0.280857	0.857191	GSE227679
100847045	MIR548AU	microRNA 548au [Source:HGNC Symbol;Acc:HGNC:43483]	0.179872		GSE227679
100847046	MIR5010	microRNA 5010 [Source:HGNC Symbol;Acc:HGNC:43484]	0.153156	0.853833	GSE227679
100847047	MIR4666B	microRNA 4666b [Source:HGNC Symbol;Acc:HGNC:43486]			GSE227679
100847048	MIR5690	microRNA 5690 [Source:HGNC Symbol;Acc:HGNC:43490]	0.497289	0.770494	GSE227679
100847049	MIR4999	microRNA 4999 [Source:HGNC Symbol;Acc:HGNC:43494]	0.0758432		GSE227679
100847050	MIR5191	microRNA 5191 [Source:HGNC Symbol;Acc:HGNC:43497]	0.138736		GSE227679
100847051	MIR5194	microRNA 5194 [Source:HGNC Symbol;Acc:HGNC:43498]	0.00683135	0.997682	GSE227679
100847052	MIR664B	microRNA 664b [Source:HGNC Symbol;Acc:HGNC:43501]	-1.34239		GSE227679
100847053	MIR5702	microRNA 5702 [Source:HGNC Symbol;Acc:HGNC:43503]	0.771932		GSE227679
100847054	MIR5588	microRNA 5588 [Source:HGNC Symbol;Acc:HGNC:43505]	0.4912		GSE227679
100847055	MIR5697	microRNA 5697 [Source:HGNC Symbol;Acc:HGNC:43509]	-0.835367		GSE227679
100847056	MIR5708	microRNA 5708 [Source:HGNC Symbol;Acc:HGNC:43511]			GSE227679
100847057	MIR5189	microRNA 5189 [Source:HGNC Symbol;Acc:HGNC:43515]	0.299425		GSE227679
100847058	MIR5681A	microRNA 5681a [Source:HGNC Symbol;Acc:HGNC:43518]			GSE227679
100847059	MIR5094	microRNA 5094 [Source:HGNC Symbol;Acc:HGNC:43519]	1.30596	0.424294	GSE227679
100847060	MIR5701-1	microRNA 5701-1 [Source:HGNC Symbol;Acc:HGNC:43522]			GSE227679
100847061	MIR4536-2	microRNA 4536-2 [Source:HGNC Symbol;Acc:HGNC:43525]	0.310864		GSE227679
100847062	MIR5195	microRNA 5195 [Source:HGNC Symbol;Acc:HGNC:43526]	1.02703		GSE227679
100847063	MIR548AX	microRNA 548ax [Source:HGNC Symbol;Acc:HGNC:43528]	-1.04345		GSE227679
100847064	MIR5694	microRNA 5694 [Source:HGNC Symbol;Acc:HGNC:43530]			GSE227679
100847065	MIR5591	microRNA 5591 [Source:HGNC Symbol;Acc:HGNC:43531]			GSE227679
100847066	MIR5692A1	microRNA 5692a-1 [Source:HGNC Symbol;Acc:HGNC:43533]	0.331889	0.898183	GSE227679
100847067	MIR5089	microRNA 5089 [Source:HGNC Symbol;Acc:HGNC:43536]			GSE227679
100847068	MIR548AO	microRNA 548ao [Source:HGNC Symbol;Acc:HGNC:43539]	-0.052836		GSE227679
100847069	MIR5590	microRNA 5590 [Source:HGNC Symbol;Acc:HGNC:43541]	0		GSE227679
100847070	MIR5196	microRNA 5196 [Source:HGNC Symbol;Acc:HGNC:43542]	1.43183		GSE227679
[truncated: 47,990 more rows]

## Sheet: WNT Gene Family
Gene_ID	Gene_Symbol	Gene_Description	log2FoldChange	padj	Study
101929777	WNT3	Wnt family member 3 [Source:HGNC Symbol;Acc:HGNC:12782]	-1.45387	NA	GSE227679
51384	WNT16	Wnt family member 16 [Source:HGNC Symbol;Acc:HGNC:16267]	-0.323898	0.905802	GSE227679
54361	WNT4	Wnt family member 4 [Source:HGNC Symbol;Acc:HGNC:12783]	-0.153575	0.902211	GSE227679
7471	WNT1	Wnt family member 1 [Source:HGNC Symbol;Acc:HGNC:12774]	-0.827253	0.677141	GSE227679
7472	WNT2	Wnt family member 2 [Source:HGNC Symbol;Acc:HGNC:12780]	1.0334	0.377826	GSE227679
7473	WNT3	Wnt family member 3 [Source:HGNC Symbol;Acc:HGNC:12782]	0.237118	0.797244	GSE227679
7474	WNT5A	Wnt family member 5A [Source:HGNC Symbol;Acc:HGNC:12784]	0.328458	0.743215	GSE227679
7475	WNT6	Wnt family member 6 [Source:HGNC Symbol;Acc:HGNC:12785]	-1.18415	0.489273	GSE227679
7476	WNT7A	Wnt family member 7A [Source:HGNC Symbol;Acc:HGNC:12786]	0.671536	NA	GSE227679
7477	WNT7B	Wnt family member 7B [Source:HGNC Symbol;Acc:HGNC:12787]	1.50753	0.14395	GSE227679
7478	WNT8A	Wnt family member 8A [Source:HGNC Symbol;Acc:HGNC:12788]	-1.06376	0.746115	GSE227679
7479	WNT8B	Wnt family member 8B [Source:HGNC Symbol;Acc:HGNC:12789]	0.180926	0.917169	GSE227679
7480	WNT10B	Wnt family member 10B [Source:HGNC Symbol;Acc:HGNC:12775]	-0.603832	0.649016	GSE227679
7481	WNT11	Wnt family member 11 [Source:HGNC Symbol;Acc:HGNC:12776]	-0.468336	0.682443	GSE227679
7482	WNT2B	Wnt family member 2B [Source:HGNC Symbol;Acc:HGNC:12781]	-0.299291	0.429559	GSE227679
7483	WNT9A	Wnt family member 9A [Source:HGNC Symbol;Acc:HGNC:12778]	0.279038	0.664155	GSE227679
7484	WNT9B	Wnt family member 9B [Source:HGNC Symbol;Acc:HGNC:12779]	-0.099063	0.965272	GSE227679
80326	WNT10A	Wnt family member 10A [Source:HGNC Symbol;Acc:HGNC:13829]	-0.326062	0.823501	GSE227679
81029	WNT5B	Wnt family member 5B [Source:HGNC Symbol;Acc:HGNC:16265]	-0.782825	0.192979	GSE227679
89780	WNT3A	Wnt family member 3A [Source:HGNC Symbol;Acc:HGNC:15983]	0.831132	0.717711	GSE227679
101929777	WNT3	Wnt family member 3 [Source:HGNC Symbol;Acc:HGNC:12782]	-2.27997	0.000776305	GSE233242
51384	WNT16	Wnt family member 16 [Source:HGNC Symbol;Acc:HGNC:16267]	0.276814	0.418198	GSE233242
54361	WNT4	Wnt family member 4 [Source:HGNC Symbol;Acc:HGNC:12783]	0.667137	0.0528092	GSE233242
7471	WNT1	Wnt family member 1 [Source:HGNC Symbol;Acc:HGNC:12774]	0.0562434	0.889273	GSE233242
7472	WNT2	Wnt family member 2 [Source:HGNC Symbol;Acc:HGNC:12780]	1.14532	3.71e-05	GSE233242
7473	WNT3	Wnt family member 3 [Source:HGNC Symbol;Acc:HGNC:12782]	0.977324	0.000119029	GSE233242
7474	WNT5A	Wnt family member 5A [Source:HGNC Symbol;Acc:HGNC:12784]	1.61708	9.68e-17	GSE233242
7475	WNT6	Wnt family member 6 [Source:HGNC Symbol;Acc:HGNC:12785]	-0.54721	0.182746	GSE233242
7476	WNT7A	Wnt family member 7A [Source:HGNC Symbol;Acc:HGNC:12786]	1.62321	0.00694548	GSE233242
7477	WNT7B	Wnt family member 7B [Source:HGNC Symbol;Acc:HGNC:12787]	1.80222	4.64e-06	GSE233242
7478	WNT8A	Wnt family member 8A [Source:HGNC Symbol;Acc:HGNC:12788]	-0.34233	0.579164	GSE233242
7479	WNT8B	Wnt family member 8B [Source:HGNC Symbol;Acc:HGNC:12789]	0.778047	0.0367048	GSE233242
7480	WNT10B	Wnt family member 10B [Source:HGNC Symbol;Acc:HGNC:12775]	-1.03707	0.000586641	GSE233242
7481	WNT11	Wnt family member 11 [Source:HGNC Symbol;Acc:HGNC:12776]	-2.311	3.94e-12	GSE233242
7482	WNT2B	Wnt family member 2B [Source:HGNC Symbol;Acc:HGNC:12781]	-0.257544	0.00395693	GSE233242
7483	WNT9A	Wnt family member 9A [Source:HGNC Symbol;Acc:HGNC:12778]	0.0664504	0.759232	GSE233242
7484	WNT9B	Wnt family member 9B [Source:HGNC Symbol;Acc:HGNC:12779]	-1.1913	1.19e-05	GSE233242
80326	WNT10A	Wnt family member 10A [Source:HGNC Symbol;Acc:HGNC:13829]	-0.180194	0.557234	GSE233242
81029	WNT5B	Wnt family member 5B [Source:HGNC Symbol;Acc:HGNC:16265]	-0.411459	0.0455271	GSE233242
89780	WNT3A	Wnt family member 3A [Source:HGNC Symbol;Acc:HGNC:15983]	0.303113	0.478241	GSE233242

## Sheet: Data Dictionary
Variable	Description
Gene_Symbol	Gene symbol or shorthand identifier (e.g., TP53, BRCA1).
Gene_ID	Gene identifier (e.g., Ensembl ID, Entrez ID, or official gene name).
Gene_Description	A brief functional or biological description of the gene, often including its family, role, or known involvement in cellular processes.
log2FoldChange	Log2-transformed fold change in expression between experimental groups.
padj	Adjusted p-value (e.g., Benjamini-Hochberg) to correct for multiple hypothesis testing.
study	Identifier or name of the study/dataset from which the results are derived.
